# Supplementary material for: Subclinical endometritis in dairy cattle is associated with distinct mRNA expression patterns in blood and endometrium
Source: PLoS One. 2019 Aug 2;14(8):e0220244. doi: 10.1371/journal.pone.0220244 (PMC6677313; doi:10.1371/journal.pone.0220244)
Supplement: S2 Table — (XLSX) [file pone.0220244.s008.xlsx]

## Sheet: Feuil1
Gene Symbol		Unigene/ Gene ID	Genbank Accession	Forward (For.) and reverse (Rev.) primers sequences (5'->3')	Product length (pb)
ART5 (LOC507756)		ID: 100336836	XM_010822848.2	For: GCCACTTTAACTGCGCCTAT	152
				Rev: TAAGAGCTGGAACCCCCAAGA
C2		ID: 515440	NM_001034492.1	For: AAAACCACGTTCCCCAACCT	156
				Rev: CACCAGGCCCACCTGAAAAA
C3		ID: 280677	NM_001040469.2	For: AGATTCTGGCCGTGAGCTTG	193
				Rev: AGCAATTCCACCCTCACCTTG
CAT		Bt.48925	NM_001035386.2	For: TCACTCAGGTGC-GGACTTTC	159
				Rev: GGATGCGGGAGCCATATTCA
CXCL8		ID: 280828	NM_173925.2	For: TTTGAGATGCCTGGCCTAGT	90
				Rev: TTTTACAGATGTAGGAAAGACAGT
LTF		ID: 280846	NM_180998.2	For: AAAGAAGCTAGCCTGCCTCC	148
				Rev: CTTGCTAAAATGACAGCAGGG
PF4		ID: 507790	NM_001101062.1	For: GATAGCTACGCTGAAGACGG	96
				Rev: GGCAACTAACTCTTCAAAAGCC
PRKCI		ID: 528478	NM_001205955.1	For: CAGGGACACCCATTCTTCCG	147
				Rev: AGGAGTGAGCTGGACAGGTT
SAA3		ID: 281474	NM_181016.3	For: GACCAGTTTGCCAACGAATG	140
				Rev: GTCAGTGTCTCTGCCCTTAG
SOD1		Bt.49637	NM_174615.2	For: CACCATCCACTTCGAGGCAA	126
				Rev: GCACTGGTACAGCCTTGTGT
SOD2		Bt.4748	NM_201527.2	For: GGATCCCCTGCAAGGAACAA	110
				Rev: TGGCCTTCAGATAATCGGGC
TFF3		ID: 517889	NM_001114509.2	For: CCAGTGCTCATCCTTCTGCTT	148
				Rev: AATAAAGCACAGCGGCGTCA
TLR2		ID: 281534	NM_174197.2	For: CTTCATTCCTGGCAAGTGGA	130
				Rev: ATGGGAGAAGTCCAGCTCAT
TRAPPC13		ID: 511108	XM_005221450.3	For: TGCCCTCACACTACTGTCTTC	130
				Rev: AATGGCCGAAGATACCACACA
Housekeeping genes
ACTB	ID: 280979		NM_173979.3	For: GAATCCTGCGGCATTCACGA	186
				Rev: GCGCGATGATCTTGATCTTCATT
GAPDH	ID: 281181		NM_001034034.2	For: GCCGATGCCCCCATGTTTGT	150
				Rev: TCATAAGTCCCTCCACGATGC
TPRG1L	ID: 616333		NM_001076418.2	For: GAAGGAGAGTCCTTTGCCAG	96
				Rev: TTGATGAAGGACATGAGCCC
