# Supplementary material for: Subclinical endometritis in dairy cattle is associated with distinct mRNA expression patterns in blood and endometrium
Source: PLoS One. 2019 Aug 2;14(8):e0220244. doi: 10.1371/journal.pone.0220244 (PMC6677313; doi:10.1371/journal.pone.0220244)
Supplement: S3 Table — (XLSX) [file pone.0220244.s009.xlsx]

## Sheet: Feuil1
Index	ProbeName	GeneName	SystematicName	Description	Sequence	Fold Change	f.value	TREAT
10676	A_73_P088371	ABCB1	ENSBTAT00000047541	PREDICTED: Bos taurus ATP binding cassette subfamily B member 1 (ABCB1), transcript variant X4, mRNA	TTCTATGACCCCTTGGCTGGCACAGTGTTAATCGATGGCAAGGAAATAAAGCAGCTGAAT	0.653424	0.00955107	0.0485246
47259	A_73_P030971	ABHD2	NM_001015549	ref|Bos taurus abhydrolase domain containing 2 (ABHD2), mRNA [NM_001015549]	TAGTTACTGGTTTTGTCCATTGCATTTGTTAGCCATGGTGACAAGCGACAGGGTTCTCAC	0.584512	0.00628821	0.00514817
48509	CUST_1763_PI427023673	ACAT1	ENSBTAG00000012885	acetyl-CoA acetyltransferase 1 [Source:HGNC Symbol;Acc:HGNC:93]	GGGTGACTTCTGTCAGAATAATCGAGTCTGCCTGTATCGAAACAATTTATTTAAATTTTG	1.38784	0.97947	0.0437562
20141	A_73_106824	ACBD7	NM_001113297	ref|Bos taurus acyl-CoA binding domain containing 7 (ACBD7), mRNA [NM_001113297]	TAGAATTTCTCACGATGTTGCCATCTGGGGAAACTGGGGAGCTCTGTGTTGTTTCTTAGA	0.580029	0.00650685	0.0195535
22089	A_73_P250666	ACLY	NM_001037457	ref|Bos taurus ATP citrate lyase (ACLY), mRNA [NM_001037457]	GTTATTGACTCTTCTCCAACCAGTTTGCATCTGTAATCCATAAAGATTCCAGGCAGCTGC	0.712719	0.0211297	0.0364539
48763	A_73_P435586	ACSL1	NM_001076085	ref|Bos taurus acyl-CoA synthetase long-chain family member 1 (ACSL1), mRNA [NM_001076085]	CTTGGGTACTTATTGAAATGGATGGTGATAAATAAATGCTCTTCTGTCGTAATGCTACTT	2.09003	0.995652	0.0280291
10445	A_73_P291416	ADAM23	NM_001083458	ref|Bos taurus ADAM metallopeptidase domain 23 (ADAM23), mRNA [NM_001083458]	CACCACCTATCAATAAAGGGGAGCAAAAGACAATATTGTACAAAGAACTATTTCAGAATC	0.531679	0.00427981	0.049083
52433	A_73_P470573	ADAM33	ENSBTAT00000017511	gb|PREDICTED: Bos taurus ADAM metallopeptidase domain 33 (ADAM33), mRNA [XM_601929]	TCATGTGCAGTGGATCCAAAGATGGCCCATGCATAGGCCACCCTTTGGGCAGCATTCACC	1.50432	0.988763	0.0422377
37851	A_73_112546	ADAMTS5	NM_001166515	ref|Bos taurus ADAM metallopeptidase with thrombospondin type 1 motif, 5 (ADAMTS5), mRNA [NM_001166515]	GAAGCTGGCGAAGGGATGTCTCCTCTCCCAGAGGCCTTCCGCGTTTAAGCAGTGTTTTCA	0.48238	0.00323268	0.0437685
24050	A_73_112917	ADAMTSL2	NM_001205934	ref|Bos taurus ADAMTS-like 2 (ADAMTSL2), mRNA [NM_001205934]	GGCGTCTTTCTCACGGCCCCGAGGCTGTGCTGCTGTCCGTCAGTAATCTCTGTATGTTAA	0.515257	0.00413168	0.00599506
46566	A_73_P070211	ADCY2	ENSBTAT00000025582	gb|Bos taurus breed Yanbian adenylate cyclase 2 (ADCY2) mRNA, complete cds. [GU553085]	ATGTTCTTTTCTGGAAAATATGGTAGCTCGCCAACCGCATCCGCTAGTCTGATACTAAAA	0.494491	0.00509001	0.0474392
39500	A_73_105440	ADCYAP1R1	AW670181	PREDICTED: Bos taurus ADCYAP receptor type I (ADCYAP1R1), transcript variant X5, mRNA	TAAGCCCCACAGACCTCACTGCTACCGCTGTGCTCACAACCTTGTCCGGGATTTTAAGGA	3.52343	0.997915	0.0416285
7708	A_73_P432626	ADGRA3	ENSBTAT00000006107	PREDICTED: Bos taurus adhesion G protein-coupled receptor A3 (ADGRA3), mRNA	TAATCAGATGCCCCTCAATCTTACCAATGCTGTGGCTACAGCCCGACAGTTATTAGCTTA	0.752081	0.0281385	0.0355275
1996	CUST_515_PI427023673	ADGRL1	ENSBTAG00000003675	adhesion G protein-coupled receptor L1 [Source:HGNC Symbol;Acc:HGNC:20973]	TCTATGTGGATATTTGCACTTACTGCAGGCTTGTTCATGTATGTTGCTCTGGTTGATATG	0.746931	0.0277071	0.0471635
27760	CUST_14_PI427023673	ADNP	ENSBTAG00000000340	Bos taurus activity dependent neuroprotector homeobox (ADNP), mRNA	TAGTGAGGTTGACCAAGATGATGTTGTTGAGTGGAAAGATGGTGCTTCTCCATCTGAGAG	0.794415	0.0518794	0.0454417
30269	A_73_P046731	AGPAT6	NM_001083669	ref|Bos taurus 1-acylglycerol-3-phosphate O-acyltransferase 6 (lysophosphatidic acid acyltransferase, zeta) (AGPAT6), mRNA [NM_001083669]	AAAGGGAAGTTTCGAAATTGGAGCCACAGTTTACCCTGTTGCTATCAAGTATGACCCGCA	0.692462	0.0184365	0.0169919
49932	A_73_P102196	AGR2	NM_001040500	ref|Bos taurus anterior gradient homolog 2 (Xenopus laevis) (AGR2), mRNA [NM_001040500]	AGCTTTAAAGAAGGCATTTGCTGAAAATAAAGAAATCCAGAGATTGGCAGAGCAGTTTGT	3.49315	0.998079	0.0194569
47157	A_73_115652	AGRP	NM_173983	ref|Bos taurus agouti related protein homolog (mouse) (AGRP), mRNA [NM_173983]	GACCCGTGCGCCACGTGCTATTGCCGTTTCTTCAACGCCTTCTGCTACTGCCGCAAGCTG	1.44061	0.986544	0.0371984
22670	A_73_P252786	AHSG	NM_173984	ref|Bos taurus alpha-2-HS-glycoprotein (AHSG), mRNA [NM_173984]	AGAAAAGCAATATGGCTTCTGTAAAGGGTCAGTCATTCAGAAAGCTCTTGGTGGGGAGGA	1.35167	0.981372	0.0226982
15678	A_73_107588	AIM1	ENSBTAT00000023304	PREDICTED: Bos taurus absent in melanoma 1 (AIM1), transcript variant X2, mRNA	TCACTAACCACAGTACGGTGGGCTAAGACCGTCTAGTGTGTGTTGAATTTCTCTCTCAAA	2.32283	0.997214	9.93581e-05
3343	A_73_112487	AJAP1	NM_001206815	ref|Bos taurus adherens junctions associated protein 1 (AJAP1), mRNA [NM_001206815]	CTGATCGGCATCTTATTCCTGTGGCCTTTGTGTCTGAGAAATGGTTTGAAATCTCCTGCT	0.339039	0.00199661	0.021047
1182	A_73_P051326	AMPH	NM_001098130	ref|Bos taurus amphiphysin (AMPH), mRNA [NM_001098130]	CTGTCTCAGTGGAGCATGTGTGCAAACAAATGTCAGAGAAAGCAAAAAGTAAATTGAGGG	0.505406	0.00411154	0.0355211
36840	A_73_111545	ANGPTL6	ENSBTAT00000020787	PREDICTED: Bos taurus angiopoietin like 6 (ANGPTL6), transcript variant X2, mRNA	AATATCTTGGACCCACATGGCTCCCCAAGGGCATTGAGATCTCAGTTTGAGCTCATATTT	0.435492	0.00335984	0.0367596
18752	A_73_120492	ANKRD50	TC442605	PREDICTED: Bos taurus ankyrin repeat domain 50 (ANKRD50), transcript variant X3, mRNA	TTTATACCCTTCCATTTGTGTTCCTTTCCTAAAAGTCATGAGTTGATAGCAGAGGAAGTG	0.702324	0.0154058	0.0484082
25282	A_73_P035851	ANXA6	NM_001103224	ref|Bos taurus annexin A6 (ANXA6), mRNA [NM_001103224]	GAGTCTTCCAGGAGTTCATCAAGATGACCAACTATGACGTGGAGCACACCATCAAGAAGG	0.586426	0.0059969	0.0146343
21093	A_73_P048996	APP	NM_001076796	ref|Bos taurus amyloid beta (A4) precursor protein (APP), mRNA [NM_001076796]	GATGATTGTACAGGATCATTGCGTATGACCATGATAGCTTTCTACACTGTATTACATAAA	0.719918	0.0164711	0.0083399
46445	A_73_P176732	ARHGAP17	CO000346	PREDICTED: Bos taurus Rho GTPase activating protein 17 (ARHGAP17), transcript variant X7, mRNA	TAGGTGAGCATAATGGATGTACTTCATTAAATAGAGTGTTAATGCATGGCTCTTTGTTCA	0.738528	0.0246945	0.0323321
36633	A_73_106167	ARPC3	NM_001034271	ref|Bos taurus actin related protein 2/3 complex, subunit 3, 21kDa (ARPC3), mRNA [NM_001034271]	GTGGGGAAGAATGAGTTGTTGCCTGGTGATTTGAAATGTCTGCAGTATTAAGCTGGTGCT	0.731744	0.0260563	0.0345215
39840	A_73_P262561	ART3	DV776606	PREDICTED: Bos taurus ADP-ribosyltransferase 3 (ART3), transcript variant X5, mRNA	ATCCCACAGAAATCATTGAAGGGAATGATGTATTTTTCACTTGTTGGTCAACATTCAGTT	0.49991	0.00403499	0.0384149
3699	A_73_115747	ASL	NM_001034428	ref|Bos taurus argininosuccinate lyase (ASL), mRNA [NM_001034428]	TGAGTCCTGACATGCTAGCCACTGACCTCGCCTACTACCTGGTCCGAAAAGGGATGCCAT	2.04802	0.995805	0.00694928
6745	A_73_P037366	ATAD2	NM_001099020	ref|Bos taurus ATPase family, AAA domain containing 2 (ATAD2), mRNA [NM_001099020]	TTCTGACTCAGGAAATGCTGTCCACCCTGAGCCAACAGAATGATTAAAAGTTTTCCCAGC	1.34893	0.978927	0.0375147
47096	A_73_110593	ATP13A2	NM_001192271	ref|Bos taurus ATPase type 13A2 (ATP13A2), mRNA [NM_001192271]	ACCGCCCCAGGCAGAGCTGCTGTCAATGTAGCAAATAAAGTCCTCCAGTTGTCCCGGCAA	1.48671	0.988242	0.0218289
34494	A_73_112788	ATP2C2	XM_587457	gb|PREDICTED: Bos taurus calcium-transporting ATPase type 2C member 2-like (ATP2C2), mRNA [XM_587457]	GTGCTGCCGGGCCCTGGGACGATCCATGAGGAGCCGGCACTATTTATTAAATGATGGTGA	1.87051	0.994115	0.0159909
50081	A_73_100357	ATP6V0A2	TC406832	PREDICTED: Bos indicus ATPase H+ transporting V0 subunit a2 (ATP6V0A2), mRNA	GATCCACAAATGCATGAAAGGACACATTTGCATCTTCCTGTCAGTATTCAGCTTCCCTTT	0.778171	0.0434066	0.0494231
5825	A_73_P089051	ATP6V0A4	NM_001205851	ref|Bos taurus ATPase, H+ transporting, lysosomal V0 subunit a4 (ATP6V0A4), mRNA [NM_001205851]	AATGAGGGGAGTGGGAGTGCCAAACTCATGTTTTCATGTAATTAAACTTTTGGGGCATTC	2.54169	0.99652	0.0301558
48414	A_73_P111191	ATP6V1B1	NM_176654	ref|Bos taurus ATPase, H+ transporting, lysosomal 56/58kDa, V1 subunit B1 (ATP6V1B1), mRNA [NM_176654]	AAGTCATGAATGCTTCCTAAAAGGCAGGGAAGGCTGGGAAGGTAGATCTTCAGCAAAAGA	2.24928	0.996347	0.0243862
37797	A_73_120702	ATP8A2	NM_001163802	ref|Bos taurus ATPase, aminophospholipid transporter, class I, type 8A, member 2 (ATP8A2), mRNA [NM_001163802]	GGAAACCATAGCAACTCTGTTGAAGGCCGAGATTAAAATATGGGTGTTGACAGGCGACAA	0.717984	0.0201915	0.0352151
6215	A_73_P120251	AU097924	AU097924	gb|AU097924 Cloned bovine fetus cDNA Bos taurus cDNA clone Cln216 3', mRNA sequence [AU097924]	TTTCTGGATTGAAATTCCAAATCCACCTTGACCGGAACTGTTTCAGGTGTTTTGGGAGGC	1.46233	0.986233	0.0317593
16772	A_73_118864	BAI1	NM_001191541	ref|Bos taurus brain-specific angiogenesis inhibitor 1 (BAI1), mRNA [NM_001191541]	CTCCGGGAAGAAACAGGGGTGGGGAATCTATTTTTTCTCTCCTTTTCTTTTCTTCAATAA	0.45653	0.00320111	0.00898042
37424	A_73_P104716	BC134716	BC134716	gb|Bos taurus cDNA clone IMAGE:8257396. [BC134716]	GTCATCGAGAACAAAAAAGCCCAATACTTAGAGTCCCAATTTTGTCTTATTTGCCAAAAA	0.618426	0.00904555	0.0182229
52270	A_73_117901	BCAT2	NM_001013593	ref|Bos taurus branched chain amino-acid transaminase 2, mitochondrial (BCAT2), nuclear gene encoding mitochondrial protein, mRNA [NM_001013593]	CTTTGACCCCAAATCTGCATCTCCGTTTTCAGGCCAGATCTCCCGGTGCTACAGTTGATT	1.68003	0.993504	0.0239319
19318	A_73_P208327	BCL2A1	NM_001037100	ref|Bos taurus BCL2-related protein A1 (BCL2A1), mRNA [NM_001037100]	CATTGTTAACTGGGGCAGGATTGTAACCATATTCGCCTTTGAAGGTATTCTTACCAAGAA	1.52275	0.982841	0.0321558
27101	A_73_119599	BCL2L1	NM_001077486	ref|Bos taurus BCL2-like 1 (BCL2L1), nuclear gene encoding mitochondrial protein, mRNA [NM_001077486]	AGCCCACACTTTTTCCAGCTCTTTGAAATAGTCTGTGTGAAAGTAAAGGTGCAGTTCAGT	1.48937	0.988427	0.0376337
6345	A_73_108611	BEND5	NM_001190953	ref|Bos taurus BEN domain containing 5 (BEND5), mRNA [NM_001190953]	AGCACAAGAAACTGTGGATGAAACTGAAATTGCACAGAGACTCTCCAAAGTCAACAAGTA	0.670858	0.00757276	0.0476167
26658	A_73_111338	BEND6	NM_001205554	ref|Bos taurus BEN domain containing 6 (BEND6), mRNA [NM_001205554]	AAGAGTCATCATTGTCCTGATCAATCCCTGTTCCATTTATTATTACCAATGACTCTCCAT	0.590028	0.00648823	0.0341169
23142	A_73_P074116	BIRC7	ENSBTAT00000006463	PREDICTED: Bos taurus baculoviral IAP repeat containing 7 (BIRC7), mRNA	TTCCTGCTCCGGACAAAAGGAAGGGACTTTGTCTGCAGGGTTCAGGAGTCCTGTTGCTGC	0.521332	0.00281696	0.0018678
33055	A_73_120990	BLM	ENSBTAT00000027057	gb|PREDICTED: Bos taurus Bloom syndrome, RecQ helicase-like (BLM), mRNA [XM_613809]	AAGCACAAACCGTACTAAATGGGCATTTAAAGGTAGACTTTATGGAAACGGAAAATTCCA	0.711369	0.0145561	0.0263257
15624	A_73_P315926	BOD1L	NM_001192190	ref|Bos taurus biorientation of chromosomes in cell division 1-like (BOD1L), mRNA [NM_001192190]	GAGCCACAAGATACAAAGGAAGAGAACTCTGGAGATTTGGAAGAGTTATCTAAAGCAAGT	0.680066	0.00819993	0.007517
18562	A_73_P039866	BZW2	NM_001104961	ref|Bos taurus basic leucine zipper and W2 domains 2 (BZW2), mRNA [NM_001104961]	AATACCCAGGTCACCACACAACACTTTTATTGGGAATGCTGAGCCATTTGAGAAGAGAAA	0.697869	0.0166891	0.0262149
9627	A_73_109280	C11H9orf9	NM_001101193	ref|Bos taurus chromosome 9 open reading frame 9 ortholog (C11H9orf9), mRNA [NM_001101193]	CAGCCTCTCCTTCCCTCGAGAGAGAGACGGAGAGAAGCCGGAAGAACTGCCAGTGTGGCT	1.72608	0.993587	0.025183
31690	A_73_P035506	C16H1orf95	NM_001083770	ref|Bos taurus hypothetical LOC614962 (C16H1orf95), mRNA [NM_001083770]	GGAGCATGTGAATAATCAGACTTATTAGAATCAATAAAACTGTAAATAGCTTCGCCTCAG	0.400699	0.00243322	0.0129909
11072	A_73_121175	C17H12orf34	NM_001206865	ref|Bos taurus chromosome 12 open reading frame 34 ortholog (C17H12orf34), mRNA [NM_001206865]	GACCATTATATTCTACTGTGAGAAGTACGGTCTGCACTATATTGTTTTAAAAACGAAGAG	0.567536	0.00693154	0.0208365
1153	A_73_P250851	C2	NM_001034492	ref|Bos taurus complement component 2 (C2), mRNA [NM_001034492]	TAATCTCAAGACAGGGTCAGAGTGGACAAACTGTGTCAAGGTCGTCCTCAAAGACAAAAC	2.46225	0.996845	0.0128635
9026	A_73_P281421	C20H5orf44	NM_001101940	ref|Bos taurus hypothetical protein LOC511108 (C20H5orf44), mRNA [NM_001101940]	AAACCAAATTTTACAATGCAGAGAGTGACCTCAGTTCTGTGACTGATGAAGTATTTCTTG	1.34125	0.973852	0.0402994
6508	A_73_104432	C21H14orf153	NM_001076459	ref|Bos taurus hypothetical protein LOC617441 (C21H14orf153), mRNA [NM_001076459]	AATTCCGCGCTGGCTCTCGGCCATTGATGTGATAGCAAATAAAACGCAAGCACTGAAAAA	1.31034	0.982711	0.0235634
24918	A_73_P049796	C22H3orf14	NM_001046510	ref|Bos taurus chromosome 3 open reading frame 14 ortholog (C22H3orf14), mRNA [NM_001046510]	TTTTCTACCAAACCCATGGAAGTGTGTTAAAAGCTGATACTGGAAAATGGACTGTTGATT	0.734855	0.0194201	0.038257
13793	A_73_P359586	C26H10orf76	XM_868603	REDICTED: Bos taurus chromosome 26 open reading frame, human C10orf76 (C26H10orf76), transcript variant X8, mRNA	TAGGCTTCTGAAAACAGACTAACTCTCAGATGTAGGTGGAGCCAGTTCTGCTTCGTTTGA	0.75397	0.0312843	0.0446842
16075	A_73_P043156	C2CD3	NM_001078130	Bos taurus C2 calcium-dependent domain containing 3 (C2CD3), mRNA	CAACAGCATGACATGAATTTGTTGCCATCCTCACAAGTAAAATTTCCAAAGTAGAATATC	1.30735	0.982685	0.047365
48124	A_73_P095701	C2H1orf64	NM_001205359	ref|Bos taurus hypothetical LOC510340 (C2H1orf64), mRNA [NM_001205359]	GTAAGCTTGAGGGTGGGGGAGAAAAGTTAAACAACCGAATAAAGACTATTCGAGCAGTGT	0.491964	0.00271657	0.0436668
42829	A_73_P102201	C3	NM_001040469	ref|Bos taurus complement component 3 (C3), mRNA [NM_001040469]	TACATCATCGGGAAGGACACCTGGGTGGAGCTGTGGCCCGAGGCTGAAGAATGTCAAGAT	2.31515	0.995972	0.00917455
35538	A_73_107855	C3H1orf189	NM_001038026	ref|Bos taurus chromosome 1 open reading frame 189 ortholog (C3H1orf189), mRNA [NM_001038026]	TGGAGGGGAGGTGGATAGATGGAACAACGTGAGCAGAGCATCCTGATTTGGTTTAATAAA	2.34345	0.996725	0.0318261
21809	A_73_P409151	C5H12orf35	NM_001101072	ref|Bos taurus hypothetical LOC510651 (C5H12orf35), mRNA [NM_001101072]	CCATGGAATTGCTAGCAACATGTCTGTCTTTGTGGAAAAAGCAACCTTCAGAACCTACCA	0.687712	0.0135125	0.0385913
1123	A_73_P054426	C6H4orf22	NM_001076389	ref|Bos taurus chromosome 4 open reading frame 22 ortholog (C6H4orf22), mRNA [NM_001076389]	TTTGAAGCAAGGAAGGCAGCTATAGAGATTGCAAGGTTGGCTGAAAGAACTCAGAAAAAG	1.87644	0.99551	0.00684253
16030	A_73_P030586	C7H19orf21	NM_001035269	ref|Bos taurus chromosome 19 open reading frame 21 homolog (C7H19orf21), mRNA [NM_001035269]	TCTTGAGTTCTGGGAGGAAAGAGACCAGTCCTCTCACCTCCTGATATAATTATTACGGCT	1.75185	0.994725	0.00205233
51446	A_73_P220927	C8H4orf27	NM_001081593	ref|Bos taurus chromosome 4 open reading frame 27 ortholog (C8H4orf27), mRNA [NM_001081593]	CTCCTGATGAACTTCCTGTATTTGTCGGTACAAACGAAGCAAAGAAAAATTGTATAATTG	0.741885	0.0284882	0.0424664
38906	A_73_P073277	CA1	ENSBTAT00000021787	Bos taurus carbonic anhydrase I (CA1), mRNA	GACAGCCTGCTTGCAAATGCAAAATCTTTTTCTTCTTTCTGTTGAACTCAAATAGTAATC	0.536014	0.00544176	0.0242894
52102	A_73_P043056	CA5B	NM_001080908	ref|Bos taurus carbonic anhydrase VB, mitochondrial (CA5B), nuclear gene encoding mitochondrial protein, mRNA [NM_001080908]	TAACAGTACCCTCTTTCACTCTCAACCATGTCCTGCTTTGTATTACAATTGCTGCTCATT	1.61038	0.987696	0.0393897
13275	A_73_112993	CACYBP	NM_001034809	ref|Bos taurus calcyclin binding protein (CACYBP), mRNA [NM_001034809]	AACAAAGTTCATGCTTGCCTTTCAGTTCCTAACATCAGCTCCCGCCAGTGTAAGAATAAA	0.749206	0.0259464	0.0445358
19264	A_73_P106821	CALCR	NM_001076269	ref|Bos taurus calcitonin receptor (CALCR), mRNA [NM_001076269]	TTGTGAAGAAAATAAAGGAATCGCAGGAGGACTCGTACATATACCTGAAGGCAGTGAGGG	1.49874	0.975752	0.0477845
25919	A_73_111407	CALM1	NM_001242572	ref|Bos taurus calmodulin 1 (phosphorylase kinase, delta) (CALM1), mRNA [NM_001242572]	TCAGCACAACCATCAACACTGCTGTTCAAGAATTCACAATTCACGTCCATTCCAAGTTGT	1.56559	0.990153	0.0499462
2551	A_73_P073491	CAMK1D	ENSBTAT00000011406	gb|PREDICTED: Bos taurus calcium [XM_605252]	ATGAAGTCTTTTATGCGTGGAATTAACTGTAAAAAGAAAATAAAAGAGGCCAAAGCCCTC	1.97924	0.995698	0.019087
29914	CUST_1953_PI427023673	CARD10	ENSBTAG00000015044	caspase recruitment domain family member 10 [Source:HGNC Symbol;Acc:HGNC:16422]	GCGTTCTCAGTCCTGTGCGTTGGTTTGCACACTCAAGATCCCACAGAGTGGACTCGAGTC	1.4851	0.987776	0.0294452
21312	A_73_P309846	CASS4	ENSBTAT00000019348	PREDICTED: Bos taurus Cas scaffolding protein family member 4 (CASS4), mRNA	TGAGCTTTCCAAAACAGGCTATCTTCATGATTCCTAGACATGCTCGGACCTCATTACCAG	0.739168	0.0263312	0.0475101
33570	A_73_P152656	CB445080	CB445080	Bos taurus pseudogene for adenylate kinase	TCATTAGATTGTGTAGTCAACATGTACTTTTTCAGATCGTTATGACTGCCTTTCTTACCT	0.741699	0.0322464	0.0329396
9398	A_73_116999	CBLN2	NM_001098919	ref|Bos taurus cerebellin 2 precursor (CBLN2), mRNA [NM_001098919]	TCACCCTTGCTGTTTATCTTTTGTGCTGGGGTGGGGAGAGAAAATGTGTGTTGGATTTCT	0.473462	0.00367242	0.0492679
397	A_73_114581	CCDC146	NM_001205487	ref|Bos taurus coiled-coil domain containing 146 (CCDC146), mRNA [NM_001205487]	ACAGCCCTAAATTACAAACAAACACAGTATCCACAATTACCCAACAGACGACAACATATA	1.95849	0.995744	0.0200131
40932	A_73_P054716	CCDC67	NM_001206892	ref|Bos taurus coiled-coil domain containing 67 (CCDC67), mRNA [NM_001206892]	TTACAAGATGAAAATCAGAAGCTCTTACAAGAACTGAAAATGTACCAAAGACAGTGCCAG	1.30763	0.98036	0.0297818
5783	A_73_106166	CCL19	NM_001034345	ref|Bos taurus chemokine (C-C motif) ligand 19 (CCL19), mRNA [NM_001034345]	AGTGTCATTGTGAGTGTGAGTGTGAGTGAGGATGTGTGGTAAAGATTGCAATGTTTCCAA	4.8284	0.998185	0.0225814
45903	A_73_P043236	CCL28	NM_001101163	ref|Bos taurus chemokine (C-C motif) ligand 28 (CCL28), mRNA [NM_001101163]	AAACACATGGCCACAAAACGCCTTATTAGAGAAGGTACAGATGAAGCTGCACAGAGGAGT	1.64142	0.990245	0.0376019
33094	A_73_P253516	CCNI	NM_001083373	ref|Bos taurus cyclin I (CCNI), mRNA [NM_001083373]	TGATTGGCTTCCTCTTACAATTGAACTGCTTCAGAAAGCACAGATGGATAGCTCCCAGCT	0.647509	0.0101539	0.0260721
48587	A_73_P328501	CD247	NM_174012	ref|Bos taurus CD247 molecule (CD247), mRNA [NM_174012]	GTAATACAAGGGCACATGGCCATGGATGGAAACCCACTCTGCTCGGTCTTAATTTATACT	1.48094	0.986537	0.0342689
5914	A_73_P381831	CDH2	NM_001166492	ref|Bos taurus cadherin 2, type 1, N-cadherin (neuronal) (CDH2), mRNA [NM_001166492]	CTCTTTTTGTTTGGGGAGGGAGAAAAGTTCTTAGCACAAATGTTTTACATAATTTGTACC	0.498721	0.00280114	0.000380546
18490	A_73_113321	CDK2AP2	NM_001035320	ref|Bos taurus cyclin-dependent kinase 2 associated protein 2 (CDK2AP2), mRNA [NM_001035320]	TCAGAAGGCCCATGGCCTCCCTGCCTTTTCTCCTGGGCCATAACAACTCTTTTCTCAGTG	1.6199	0.991736	0.0198669
21942	A_73_106201	CDK5R1	ENSBTAT00000054880	p25/p35=Cyclin-dependent kinase 5 activator [cattle, brain, mRNA, 3582 nt]	GTAAAGAAACCGATATACTTGAGTGTGCAAGCAATGAACCCATTTGACATGCTGCTATGA	0.569872	0.00550465	0.0133522
46591	A_73_P043431	CDKL2	NM_001103274	ref|Bos taurus cyclin-dependent kinase-like 2 (CDC2-related kinase) (CDKL2), mRNA [NM_001103274]	CATTTATTTGGAAGTGAGTTCAGTGGAGGTAGATGATCAAAACTAGGATCAATTGAAGAA	1.40011	0.979282	0.0376347
48025	A_73_P305581	CDKN2C	NM_001101054	ref|Bos taurus cyclin-dependent kinase inhibitor 2C (p18, inhibits CDK4) (CDKN2C), mRNA [NM_001101054]	GCTCTCCCACACTGTCTTCTGTTTTGTCAGTTAATTGATTGGCTGTCCTATTTTAATATC	1.6582	0.991439	0.0251074
33952	A_73_110835	CDKN2D	NM_001046050	ref|Bos taurus cyclin-dependent kinase inhibitor 2D (p19, inhibits CDK4) (CDKN2D), mRNA [NM_001046050]	TATGGAAAATATTGTTGTGTGTGTAATTTAATGTTTTTACCCATTAAATTAAGACTTGTG	1.69462	0.99418	0.00902046
14579	CUST_535_PI427023673	CEACAM1	ENSBTAG00000005615	PREDICTED: Bos taurus carcinoembryonic antigen related cell adhesion molecule 1 (CEACAM1), transcript variant X14, mRNA	ACTAGAAGTAACTAGAAAACAACTTCTCAGTGTTCATAAGTGTATCTTGATGGAAACTGC	2.17044	0.996881	0.0221684
32175	A_73_P104176	CEACAM8	BC120204	PREDICTED: Bos taurus carcinoembryonic antigen related cell adhesion molecule 1 (CEACAM1), transcript variant X8, mRNA	CTAGAAGTAACTAGAAAACAACTTCTCAGTGTTCATAAGTGTATCTTGATGGAAACTGCA	2.09911	0.996594	0.0319487
17477	A_73_P252986	CFB	NM_001040526	ref|Bos taurus complement factor B (CFB), mRNA [NM_001040526]	TGTTCAAACTCCAAGGCATGGAAAACCTGGAGGATGTTTTCGTCCAAATGCTTGATGAAA	3.10305	0.997968	0.0178665
14911	A_73_P106966	CH148 WC1	ENSBTAT00000042881	Bos taurus isolate CH148 WC1 tail-like mRNA, partial sequence	TGAAGATGCTCTTGCTGAAGCCGTGTATGATGAGCTTGATCATCTTGTGACTCAGAAGGA	1.29207	0.965549	0.0464749
21406	A_73_113068	CHAF1B	NM_001098014	ref|Bos taurus chromatin assembly factor 1, subunit B (p60) (CHAF1B), mRNA [NM_001098014]	AGAGATATGTCACCTCTTGTATTTAGGATACTTTTTCCCTCGGAGATGTGAACATCTTAA	0.692769	0.0141902	0.0349079
9449	A_73_111139	CHCHD1	NM_001046484	ref|Bos taurus coiled-coil-helix-coiled-coil-helix domain containing 1 (CHCHD1), mRNA [NM_001046484]	TGGACTTAGCTTCTGAGAATTAAACAGAGGCATTTTAGAGATATTTGCACTGCCATGCTC	1.32656	0.975441	0.0234401
47592	A_73_P065276	CHD3	ENSBTAT00000019119	ens|PREDICTED: Bos taurus misc_RNA (CHD3), miscRNA. [Source:RefSeq DNA;Acc:XR_028724] [ENSBTAT00000019119]	CTGTCCCAGTTCCCTCTTCTGTATCAGGTTTATTGGTTGTACATATAAATTATACTTTCC	0.663165	0.00897542	0.0277625
26814	A_73_101651	CHEK1	NM_001098023	ref|Bos taurus CHK1 checkpoint homolog (S. pombe) (CHEK1), mRNA [NM_001098023]	TGATTGGTCTTTCAAATAGAAGTTGAGCATAAACTCTAGTGCTTAACTACCTTTACTTGG	0.639652	0.0113608	0.0428771
19424	A_73_P038011	CIP2A	NM_001103284	ref|Bos taurus cancerous inhibitor of PP2A (CIP2A), mRNA [NM_001103284]	CTGAATGAGTCACTCAAGCAGCAAAATGAAAAAACTATTGCCCAATTGATAGAGAAAGAA	0.675415	0.00922382	0.0353986
5339	A_73_108361	CKMT1	NM_174275	ref|Bos taurus creatine kinase, mitochondrial 1 (ubiquitous) (CKMT1), nuclear gene encoding mitochondrial protein, mRNA [NM_174275]	AAGCATTAACTCCCGTCCCCAGTGGATGACTCAAGACTCCCAGGACCTCTGCCATTCTAA	1.84996	0.993364	0.0157614
181	A_73_P070821	CLIP1	NM_001192823	ref|Bos taurus CAP-GLY domain containing linker protein 1 (CLIP1), mRNA [NM_001192823]	ATAGTGGACCTTCAGAGGAAGAATCAGGACCTCAAGATGAAGGTGGAGATGATGTCAGAA	1.76346	0.993723	0.00270797
45004	A_73_P351896	CLIP3	NM_001205898	ref|Bos taurus CAP-GLY domain containing linker protein 3 (CLIP3), mRNA [NM_001205898]	AGTAGAACATTCCTGAGTCACTAGTCACTGGAGCAAAACCATTCCCTATTAACAAAGTCC	0.597444	0.00594274	0.0335315
38925	A_73_108625	CMIP	XM_001251051	gb|PREDICTED: Bos taurus c-Maf-inducing protein (LOC782414), mRNA [XM_001251051]	TCACGTAGCTGTGTTCAGAGATGTGAAAAACTTTCAGGCAAAAATAAAACTGTAAGTGAC	1.4043	0.984963	0.044114
22881	A_73_P249031	CNKSR2	NM_001206513	ref|Bos taurus connector enhancer of kinase suppressor of Ras 2 (CNKSR2), mRNA [NM_001206513]	CTGTCTTCAATGATTTAAAATTAACTTTTGCAAACAACCCTGAAGACAGGTGGTCTTCAA	0.685839	0.0155124	0.0284758
22364	A_73_P329351	CNKSR3	NM_001192112	ref|Bos taurus CNKSR family member 3 (CNKSR3), mRNA [NM_001192112]	TAAAAAATCTGGTGAGAAAGTTGAGAGAGAATCCTACTGGAGTTGTGTTACTGCTTAAGA	0.659455	0.010752	0.0362618
22505	A_73_109193	COCH	NM_001077842	ref|Bos taurus coagulation factor C homolog, cochlin (Limulus polyphemus) (COCH), mRNA [NM_001077842]	TTTAGGCTTGATTGTTCAGAACGCTTCATCATCATGATCCTTAGAATCTCAGGAAAGAGA	0.442846	0.00378502	0.0332969
9072	A_73_P092876	COL11A1	NM_001166509	ref|Bos taurus collagen, type XI, alpha 1 (COL11A1), mRNA [NM_001166509]	CCAACCCATTTTACGCCACATGCAAGTTTTGAATAAGAATGGTATAGAAAATAACTTGCT	0.418835	0.00252574	0.0175571
27269	A_73_104907	COL4A5	XM_001790136	gb|PREDICTED: Bos taurus type IV collagen alpha 5-like, transcript variant 3 (COL4A5), mRNA [XM_001790136]	TAGTCATAGAACACCTTATTTCCCTAGCTGTCATCTTCTCACTAAATGTTTTTAACTCAC	0.474469	0.00346912	0.0344618
6540	A_73_P074126	COL9A3	ENSBTAT00000020699	ens|Collagen alpha 3(IX) chain Fragment [Source:UniProtKB/TrEMBL;Acc:Q7M2Q5] [ENSBTAT00000020699]	ACAACTTCGGGAAGAGTGAGAAAGCGGTGCCAACTGAGCAGTGGGCTCTGGAAGGATCGT	0.27525	0.001758	0.0240865
37327	A_73_115635	CORO2A	NM_001038220	ref|Bos taurus coronin, actin binding protein, 2A (CORO2A), mRNA [NM_001038220]	GTGTATTCTAAGCCCTTTCTCTAAGGTGCTCTCTCTCACAGTGGTCAGTACAACAATGCA	1.36921	0.979675	0.0233063
48475	A_73_P072976	CPA6	ENSBTAT00000061366	PREDICTED: Bos taurus carboxypeptidase A6 (CPA6), mRNA	TGGACCAATGATCGATTTTGGAGAAAAACAAGGTCAAGGAACTCAAGGTTTCGCTGCCGT	0.534189	0.00430069	0.0491183
37561	A_73_107623	CPNE5	NM_001205639	ref|Bos taurus copine V (CPNE5), mRNA [NM_001205639]	GTCCTGTGCCCGTCTCTGAGACAGTCTCTGTGTGGAATTTGCCTTAAACTGAAGTAAATT	0.420175	0.0027039	0.0369669
25162	A_73_111930	CRACR2A	CB422545	PREDICTED: Bos taurus calcium release activated channel regulator 2A (CRACR2A), transcript variant X4, mRNA	ATGGCTGCATGTACTGCTGTGGATGTGCTAATCAACGCTTCGGGATTGTACATTTGAAGA	1.52737	0.990438	0.00400943
10961	A_73_P311436	CREB3L2	NM_001102533	ref|Bos taurus cAMP responsive element binding protein 3-like 2 (CREB3L2), mRNA [NM_001102533]	AAACCACCTTTTGTCATAAGCTTTTCCTTTTTGCCCACCCAATCTGGACGAAAACCTGGA	0.707223	0.0154186	0.0195605
51986	A_73_P493993	CRIP1	A_73_P493993	Bos taurus cysteine rich protein 1 (CRIP1), mRNA	ATGGTGGAGCCGAGGGCCACACTTTCAAGTAAACCCAGGTTTTGGAGACCCCTCTCTCCA	1.86212	0.995913	0.0131174
32877	A_73_102764	CRISPLD1	NM_001101165	ref|Bos taurus cysteine-rich secretory protein LCCL domain containing 1 (CRISPLD1), mRNA [NM_001101165]	TGTGCCATTAATTTGTGCCACAACATGAACATCTGGGGGCAAATATGGCCCAAAGCTGTT	0.599706	0.00541794	0.0406974
32949	A_73_P419451	CTNNA3	ENSBTAT00000050546	ens|catenin, alpha [Source:RefSeq peptide;Acc:NP_001073106] [ENSBTAT00000050546]	AAGGCTGAGTGCTGAAGAATTGATGCTTTTGAACTGTGGTGTTGGAGAAGACTCCTGAGA	0.800258	0.0374434	0.0366766
13796	A_73_P074956	CUL5	ENSBTAT00000017119	PREDICTED: Bos taurus cullin 5 (CUL5), transcript variant X5, mRNA	GGCACCCTCGTATTTACAACAAAATGGTGTACAGAATTATATGAAATATGCAGATGCTAA	0.749397	0.0269637	0.0173302
45599	A_73_112080	CUX2	NM_001192597	ref|Bos taurus cut-like homeobox 2 (CUX2), mRNA [NM_001192597]	GAAGATGGCCAACCTGAACAGCATCATCTACCGGCTGGAGCGGGCTGCCAATCGGGAGGA	0.781717	0.0322075	0.0479389
39926	A_73_P075131	CXCR5	ENSBTAT00000023738	Bos taurus Burkitt lymphoma receptor 1, GTP binding protein (chemokine (C-X-C motif) receptor 5) (BLR1), mRNA, incomplete 5' cds	GCACAGAGAGCCCCGGAACAAGCCTAAAAATTGTCTCAAAATAAAAACGAAGATGTCTTC	1.75139	0.993933	0.0179205
16666	A_73_107951	CYP27C1	XM_869576	gb|PREDICTED: Bos taurus FLJ16008 protein-like (LOC617338), mRNA [XM_869576]	TGGGAATGTAGAATTAGCTGTATAGTACAGGAAACTGTATTCAGTATCCTGGGATAAGCC	0.514288	0.00419569	0.0225811
41012	A_73_113083	DCBLD1	TC416258	PREDICTED: Bos taurus discoidin, CUB and LCCL domain containing 1 (DCBLD1), transcript variant X2, mRNA	TGCTGGAAGGTCACAGCAGACTATCTGTGGTTACTATGGAGGACAAACCATTTACCTTGT	1.84868	0.994794	0.0413652
48264	A_73_105723	DDAH1	NM_001102201	ref|Bos taurus dimethylarginine dimethylaminohydrolase 1 (DDAH1), mRNA [NM_001102201]	TGCACTGATTTTAGTCTCTTGCTGTCCTGATCCTACAGGTATACCAATCACGATGGAATA	0.652724	0.00704234	0.0418495
17171	A_73_P044911	DEFB	NM_001078133	ref|Bos taurus defensin, beta (DEFB), mRNA [NM_001078133]	CTCAGGAGCCACGTGGAGTATTTGTAACCATTGTTTTAATAAAAGGATTTTGTGAGGCAG	4.1367	0.997944	0.0141373
17408	A_73_P050736	DHRS12	NM_001100313	ref|Bos taurus dehydrogenase/reductase (SDR family) member 12 (DHRS12), mRNA [NM_001100313]	CCCCCTGTAGCAATGAGGAGTCCAGGATGGAAACTTTTATTTTAAAATACATGATTGCGG	1.5005	0.988892	0.025674
37632	A_73_P034156	DHRS7	NM_001046162	ref|Bos taurus dehydrogenase/reductase (SDR family) member 7 (DHRS7), mRNA [NM_001046162]	CAAGCCACTGGAAAGAGAAATGGAAAATATGAAAAACAGTGATCTTCTTACACATTGAAG	1.6538	0.993566	0.00742309
31846	A_73_P128151	DIP2B	NM_001192309	ref|Bos taurus DIP2 disco-interacting protein 2 homolog B (Drosophila) (DIP2B), mRNA [NM_001192309]	AGGTATATGTAGATGGGCCATGTTATTTGTCCAGAGGAAGAGAGTGTAAAGATATAAGAA	0.665178	0.0102703	0.0042433
23696	A_73_P283446	DKC1	NM_001105395	ref|Bos taurus dyskeratosis congenita 1, dyskerin (DKC1), mRNA [NM_001105395]	TGTAGCCAAGATCAAGAGAGTTATCATGGAGAGAGACACTTACCCTCGGAAATGGGGTTT	0.744502	0.0251349	0.0326544
17269	A_73_119390	DMAC1	DV798521	PREDICTED: Bos taurus distal membrane arm assembly complex 1 (DMAC1), transcript variant X2, mRNA	CTTGTTCTTGTCTTTCAGAACTAGGATTGTTCCCAGGAAGCAAGAATTACCTTTATGAAA	0.678009	0.0180861	0.0223935
20508	A_73_P180412	DN519178	DN519178	B.taurus DNA sequence from clone CH240-512N8, complete sequence	CATCTTTAAAAACAAAACACACACACACAGCCCTTGAAGGGAAGGTAGATAGCATTTACA	0.583457	0.00574869	0.0306365
33885	A_73_P415636	DOK5	NM_001075939	ref|Bos taurus docking protein 5 (DOK5), mRNA [NM_001075939]	GAGAAATTTTCTGACGAGCGTGCCGCCTATTTTAGGTGTTATCATAAGGTTACAGAACTC	0.710107	0.0238044	0.0348525
32521	A_73_P285341	DTD1	NM_001038104	ref|Bos taurus D-tyrosyl-tRNA deacylase 1 homolog (S. cerevisiae) (DTD1), nuclear gene encoding mitochondrial protein, mRNA [NM_001038104]	ATCTTAAACCTGCGTGTATTTGAGGATGAAAGTGGGAAACACTGGTCGAAGAGCGTGATG	0.765794	0.0318115	0.0361432
16524	A_73_102026	EE911170	EE911170	gb|A43180A FFB Bos taurus cDNA clone A4318 5', mRNA sequence [EE911170]	GAGGCAACATGACAGGTTCCCTGAGGTCCCCATCTTAACTCAAGAGGAACCCCAAGCTTC	0.791979	0.0435655	0.0462751
26057	A_73_P030806	EFNA3	NM_001105429	ref|Bos taurus ephrin-A3 (EFNA3), mRNA [NM_001105429]	CCTGGGCCTTTTTCAAGTGCTTTGGCTGTGACTTTCATACTCTGCTCTTAGTCTAAAAAA	0.557374	0.00366728	0.0361276
18650	A_73_102603	EH175578	EH175578	gb|LB01654.CR_P04 GC_BGC-16 Bos taurus cDNA clone IMAGE:8386230 5', mRNA sequence [EH175578]	CTTCTTGTTTTGTGCTGCTCAAAGAAGGGATTCCTCAATTATCTGGGAGCACCAAGAATC	0.673736	0.0122761	0.0478446
32911	A_73_P342831	EIF2S2	NM_001015621	ref|Bos taurus eukaryotic translation initiation factor 2, subunit 2 beta, 38kDa (EIF2S2), mRNA [NM_001015621]	TTTTGAGAAGATATATCAAGGAATACGTCACCTGTCACACGTGCCGATCACCAGACACAA	0.785264	0.0398581	0.0278143
47084	A_73_P255036	EIF3A	NM_001206314	ref|Bos taurus eukaryotic translation initiation factor 3, subunit A (EIF3A), mRNA [NM_001206314]	TTTCTAGAAAGGACTCTCGTTGGGGAGATAGAGATACAGAAGGCACTTGGAGAAAAGGAC	0.618005	0.00696571	0.0050004
11338	A_73_P166932	ELF2	NM_001191138	ref|Bos taurus E74-like factor 2 (ets domain transcription factor) (ELF2), mRNA [NM_001191138]	GCGCAAAGAAAAGCTCATTGATTCTTATCCCATTTGGGGTTAATCTCAATCTCTACTCCT	1.26869	0.962398	0.0418897
7220	A_73_100912	ELF5	TC410991	PREDICTED: Bos taurus E74-like factor 5 (ets domain transcription factor) (ELF5), transcript variant X3, mRNA	TGAACCGCAAGATAGACTGAGGGCCTCCATCTTAGAGTTTCACGTCAAAAGTCACTTGTT	1.99431	0.996104	0.0330432
32791	A_73_107917	ELL3	NM_001046126	ref|Bos taurus elongation factor RNA polymerase II-like 3 (ELL3), mRNA [NM_001046126]	AATGGGAAAGGGCTTGGGCGTTACCCATGTATTAGAAGTGAATTCTTTTACAAACATGGC	1.80751	0.992086	0.0321324
39835	CUST_963_PI427023673	ELOVL6	ENSBTAG00000010564	PREDICTED: Bos taurus ELOVL fatty acid elongase 6 (ELOVL6), transcript variant X1, mRNA	GGGCTTTCTCAGCATCTCGTCTATGTGTGGAATTAAAAAGAATAAAGTTTTATTCCATTC	1.96471	0.995719	0.0285183
15659	A_73_P304291	EMP1	XM_001251793	gb|PREDICTED: Bos taurus epithelial membrane protein 1-like, transcript variant 2 (LOC786490), mRNA [XM_001251793]	TCTGTGGTATTTGTGACAAAATGGGAAGAAGAGACATAGTGATTAAGGCCTAGTTGGTGG	1.68186	0.994309	0.0442474
53768	A_73_P383976	ENKUR	NM_001192445	ref|Bos taurus enkurin, TRPC channel interacting protein (ENKUR), mRNA [NM_001192445]	ATAGTGAGAAAAAAGCTAAGTAGTTTTCAGGACTCGTATGGTGGCCATGGATCCAACGGG	1.53622	0.98919	0.0219304
8730	A_73_P418361	ENTPD2	NM_001105648	ref|Bos taurus ectonucleoside triphosphate diphosphohydrolase 2 (ENTPD2), mRNA [NM_001105648]	GGTCACAGCCCAGGCCTACTTGTACCCATTTTTTACTATTGAATAAAAGGATTTTCGTAG	2.53907	0.996288	0.0449783
49841	A_73_110671	EPHB2	NM_001191498	ref|Bos taurus EPH receptor B2 (EPHB2), mRNA [NM_001191498]	GGCTTCACCTCCTTCGATGTCGTGTCACAGATGATGATGGAGGACATTCTCCGGGTTGGG	0.611947	0.00843102	0.0483369
15941	A_73_107240	EPN2	EE374074	PREDICTED: Bos taurus epsin 2 (EPN2), transcript variant X10, mRNA	GTCTGGACAGCTAGCCTAGTGGGCAAGTCAGTCTCCATTTCCACAGTGGACGTCTTGCCT	1.38197	0.982814	0.0277511
37963	A_73_P378426	ERGIC3	NM_001034353	ref|Bos taurus ERGIC and golgi 3 (ERGIC3), mRNA [NM_001034353]	ATGGAAGACATCAAGTGCTGTAACTCCTGTGAGGACGTGCGGGAGGCATATCGCCGTCGA	0.709413	0.0209908	0.0368814
53342	A_73_P080447	ERH	ENSBTAT00000023664	PREDICTED: Bos indicus enhancer of rudimentary homolog (Drosophila) (ERH), mRNA	TTCAAGTTCCGATACGTTTCCTGTGTGCTTCCTTTCCCTTAACCAAGATGGCTGAAACAG	1.25517	0.958182	0.0429399
24244	A_73_109499	EXPI	NM_001205278	ref|Bos taurus extracellular proteinase inhibitor (EXPI), mRNA [NM_001205278]	ACAAATTCGATGCTTGGCATAACAAGGCTTCCATATCCATTCCTTGCTCTTTCCTTTGCC	3.92521	0.998115	0.0440407
52392	A_73_P048986	EYA2	NM_001035464	ref|Bos taurus eyes absent homolog 2 (Drosophila) (EYA2), mRNA [NM_001035464]	GGGGAGGAGGTGGTATTTTGCGACGGAAAGAGGCATTAAATAAAACCACGTTTACATTTT	3.28791	0.997998	0.0017509
42995	A_73_101542	FAM154B	XM_618236	gb|PREDICTED: Bos taurus hypothetical LOC538044 (LOC538044), mRNA [XM_618236]	AAACTACAAATTCCCAAGGTCATAAATTCTTCCGCAAGATCGCTCCCGCGGTGAAGGCCT	1.81437	0.993159	0.0153742
13833	A_73_110828	FAM160A1	ENSBTAT00000018468	gb|PREDICTED: Bos taurus hypothetical LOC528939 (LOC528939), mRNA [XM_607376]	TCCATCCATCCTGGAACTCTTCTTCCACACTAGTGAGGACCAAGGGGCCGCGAACTTCCT	1.52659	0.988434	0.00758246
16896	A_73_P367321	FAM178A	NM_001102259	ref|Bos taurus family with sequence similarity 178, member A (FAM178A), mRNA [NM_001102259]	CACAGCTGGAAACAGTAATCTTTCAAACCTGGAAAATGGACATCTCTCAAGAAAAAGATC	0.750813	0.0264442	0.0221796
7003	A_73_P047196	FAM190A	NM_001076437	ref|Bos taurus family with sequence similarity 190, member A (FAM190A), mRNA [NM_001076437]	GCCATAGGGCTAAGGAGAACAAAGCAGGTTTTACTGAATTCTATATTTGTTTTAAACAGG	1.39385	0.982632	0.042236
19072	CUST_2176_PI427023673	FBRSL1	ENSBTAG00000039766	PREDICTED: Bos taurus fibrosin like 1 (FBRSL1), transcript variant X19, mRNA	ATCTACCACCATCAGCAGAAGATAAAGCAGATGCAGCTGGAGCCCCACAAGCTGGACGTG	0.619541	0.0108073	0.0435175
22012	CUST_485_PI427023673	FCGBP	ENSBTAG00000005261	PREDICTED: Bos taurus Fc fragment of IgG binding protein (FCGBP), transcript variant X2, mRNA	AACTCCCAAGAGACAACGTTGGAGAATTGGAAAGCACAGGACTTCTCCCCATGCCCTTCC	3.37217	0.997267	0.0117185
7824	A_73_103817	FFAR2	TC488795	PREDICTED: Bos taurus free fatty acid receptor 2 (FFAR2), transcript variant X1, mRNA	CCTTCAGAGGAACTCTGAGTTTCGTAGGAGTTGAGCAGGCTTGGAGAGGGAGAACACGAG	1.24819	0.958426	0.0468382
9512	A_73_107857	FGD3	NM_001024527	ref|Bos taurus FYVE, RhoGEF and PH domain containing 3 (FGD3), mRNA [NM_001024527]	CCTCAAGATTTGTGCCTGCCTCCCCTGGCGGGTGGCGGACAGTGCTTATCTGCATAAATA	1.58472	0.990349	0.0205206
8477	A_73_P136491	FGD4	DV881899	PREDICTED: Bos taurus FYVE, RhoGEF and PH domain containing 4 (FGD4), transcript variant X5, mRNA	TATTCTTGAGATTCAAGTAACCATCAAAAGCCTTTTTATTTTTGCAAAGGGTCTGGATGG	1.45753	0.986774	0.0487851
42261	A_73_102234	FGF18	NM_001076007	ref|Bos taurus fibroblast growth factor 18 (FGF18), mRNA [NM_001076007]	CCAGAGGAGGACTTGAATGAGGAAAACGACACTCTGAGAAACCAAAGTCCTTTTTCCCAA	3.04715	0.997922	0.00439295
50475	A_73_P043261	FHL1	NM_001113259	ref|Bos taurus four and a half LIM domains 1 (FHL1), transcript variant 2, mRNA [NM_001113259]	AATTCATCCTACAGAAGTAACCATAAAACTCAAGAGGGGTAGGTGAACAGGCGCCAGAAC	1.74568	0.994467	0.0299231
39994	A_73_P101131	FIGF	NM_001101043	ref|Bos taurus c-fos induced growth factor (vascular endothelial growth factor D) (FIGF), mRNA [NM_001101043]	AAGTTTGATGAAGATCGTTGTGAGTGTGTCTGTAAAACGCCATGTCCCAGAGACCTCATC	1.69449	0.993158	0.0456414
1011	A_73_P113486	FRMD5	NM_001206201	ref|Bos taurus FERM domain containing 5 (FRMD5), mRNA [NM_001206201]	TTGAACAGTTCCACTATCAATACTTTTGTCCCCTCAGGCGATGGTTTGCCTGCAAAATCC	1.62612	0.989946	0.0384908
19204	A_73_113975	FSTL3	NM_001075710	ref|Bos taurus follistatin-like 3 (secreted glycoprotein) (FSTL3), mRNA [NM_001075710]	AACAGGGCAATCTCCCCCGCCCTGGGGTCCTGCCTTACCTGCCAAAGAAATAAACACTGA	1.69784	0.993791	0.042009
31892	A_73_P288741	FTO	NM_001098142	ref|Bos taurus fat mass and obesity associated (FTO), mRNA [NM_001098142]	GTTGGGAACAATTAGGGAGTGGAACCTATGAAGATTAAAATGTTTGAAAATGACACAGTG	0.740396	0.0239401	0.0152987
17618	A_73_P047711	GAR1	NM_001035303	ref|Bos taurus GAR1 ribonucleoprotein homolog (yeast) (GAR1), mRNA [NM_001035303]	AAGTTTTATATAGACCCATATAAGCTGCTGCCGTTGCAGAGGTTTCTACCTCGACCTCCT	0.615884	0.00872213	0.0163368
20197	A_73_P431946	GARNL3	NM_001077872	ref|Bos taurus GTPase activating Rap/RanGAP domain-like 3 (GARNL3), mRNA [NM_001077872]	GTGTTACAACTACAGTTGCATCTACAAAAAGGTTTGCCCATTTAATGGTGGCTCTTTTTT	0.772576	0.0320764	0.0430676
5948	A_73_P450176	GATSL3	NM_001081514	ref|Bos taurus GATS protein-like 3 (GATSL3), mRNA [NM_001081514]	TGTCATGGATGCTGAGACGCAGAAAAAGTTCCCCAGTGACCTGCTGCTGACCAGCTCCTC	1.63666	0.992324	0.0212352
47517	A_73_110541	GCHFR	NM_001114526	ref|Bos taurus GTP cyclohydrolase I feedback regulator (GCHFR), mRNA [NM_001114526]	TCCAGGACTGGGTGGGTAGGGCCTGCATAGCTAGTCCAAGCCAATAAAGGGCTGTGATGA	1.57285	0.991802	0.00752537
15090	A_73_119343	GCNT3	NM_205809	ref|Bos taurus glucosaminyl (N-acetyl) transferase 3, mucin type (GCNT3), mRNA [NM_205809]	TGCAGTGCTTAGAAGAGTATTTACGTCATAAGGCCATCTATGGGACTGAACTTTGAGCTG	2.40468	0.997435	0.0383241
5399	A_73_P089621	GIMAP1	NM_001083677	ref|Bos taurus GTPase, IMAP family member 1 (GIMAP1), mRNA [NM_001083677]	CCAAGAGATGAAGAAAATGCCTATGGTTTCCAGGAGTTCAGGTCCGCCCTGCAGGAGCGC	1.47533	0.975256	0.0330334
11941	A_73_P089611	GIMAP6	ENSBTAT00000007364	PREDICTED: Bos taurus GTPase, IMAP family member 6 (GIMAP6), mRNA	ACATACCTGGAGAAGACCGACAACCATGCGCTGGCCAAGCTGCATAAGGACTGCTCAAGG	1.32024	0.966453	0.0452105
40239	A_73_P048936	GLTP	NM_175799	ref|Bos taurus glycolipid transfer protein (GLTP), mRNA [NM_175799]	GACATAAGTGGCAACATCACCAAAATCAAAGCTGTCTATGACACCAACCCGACCAAGTTC	0.707648	0.0147311	0.025694
50373	A_73_119118	GNB2	NM_001097561	ref|Bos taurus guanine nucleotide binding protein (G protein), beta polypeptide 2 (GNB2), mRNA [NM_001097561]	CCTCATCCCGCTGGAGGGCCAGAGGCAGGAGGTGGAAACTCCAGGGGCTGGCTTTTTTAA	1.25634	0.959465	0.0449345
6788	A_73_P035061	GNLY	NM_001075143	ref|Bos taurus granulysin (GNLY), mRNA [NM_001075143]	TGGACATCAAGATGTGCAAAAGCAAGCCAGTAGGTTTCATTTGATTCCCTGGGTCCTCTT	1.94716	0.995236	0.0418235
49798	A_73_110654	GOLT1A	NM_001075361	ref|Bos taurus golgi transport 1A (GOLT1A), mRNA [NM_001075361]	TCAGGACTGCTGGGAACAGAGACCCAGAGCCCACGAGAGGAAAAGCAGAGATTAAACCCC	2.11345	0.995113	0.01781
27183	A_73_P442036	GP2	ENSBTAT00000008217	PREDICTED: Bos taurus glycoprotein 2 (GP2), transcript variant X4, mRNA	GGAGAGAAACCAGACCCATGCCATCTACATAAACACGCTCTCCTTAGTCAACGATTTCAT	1.83783	0.994308	0.0354633
4165	A_73_P042816	GPA33	NM_001035330	ref|Bos taurus glycoprotein A33 (transmembrane) (GPA33), mRNA [NM_001035330]	CTGGCAGAGGTTTTGCACACAATGCATTTTTGTTGAATGAATGAAAGAATAAATGAGTAC	1.29198	0.969742	0.0424371
45760	A_73_P336756	GPATCH4	NM_001078129	ref|Bos taurus G patch domain containing 4 (GPATCH4), mRNA [NM_001078129]	ACAAATCACTGGTGGAATGATCTGTTCAACAAGACTGCAGCCAACTTGGTGGTGGAAACT	0.710838	0.0180194	0.0446607
15380	A_73_120819	GPC5	NM_001102070	ref|Bos taurus glypican 5 (GPC5), mRNA [NM_001102070]	GACATTGAACACGTGCTTCTGAACTTCCACTTGCTTGTTAATGATGCTGTGATGCAGGCT	1.3173	0.974563	0.0298704
34816	A_73_P183827	GPD2	DT890433	PREDICTED: Bos taurus glycerol-3-phosphate dehydrogenase 2 (GPD2), transcript variant X2, mRNA	AGATGGGGGTACCTTCACCTGAATCCCATTAAAGGCTCTTTAAACAAATCACTTGATGAC	0.646856	0.0112847	0.0450395
33016	A_73_P298106	GPM6A	NM_001075309	ref|Bos taurus glycoprotein M6A (GPM6A), mRNA [NM_001075309]	ATAGCACTTCATTTCCTAATTTGTTAAATTGGTGCAATCAGATCTCTTCTACAAGCTCCA	0.683594	0.0145221	0.0437886
16532	A_73_106762	GPR143	XM_864344	gb|PREDICTED: Bos taurus G protein-coupled receptor 143 (GPR143), mRNA [XM_864344]	AGCCCAGCAGCTTGTCCGGAGTCTCCGTGGACGTTCGTTTCTCTGATCTGGCTGTAATGT	0.54645	0.00420969	0.0426298
13976	A_73_100528	GRAMD4	DV840326	PREDICTED: Bos taurus GRAM domain containing 4 (GRAMD4), transcript variant X4, mRNA	ATGTCTGAAGCTTGAGTCTATTTTCAATCTGTAAATGCTCCTTACCAGTAACTTTTGTTC	0.709233	0.017201	0.0428895
28590	A_73_P069501	GSC	NM_001192386	ref|Bos taurus goosecoid homeobox (GSC), mRNA [NM_001192386]	AAGCGGTCCTCTTCCGAGGAGTCGGAAAACGCTGAGAAGTGGAACAAGACGTCGTCGAAG	2.09322	0.997325	0.047925
19581	A_73_P487143	GSTM1	NM_175825	ref|Bos taurus glutathione S-transferase M1 (GSTM1), mRNA [NM_175825]	AAGGAGATCCCTGAAAAAATCAAGCTGTTCTCAGAGTTTCTGGGGAAGAGGCCTTGGTTT	1.67549	0.994799	0.00900916
6348	CUST_2787_PI427023673	GSTM2	ENSBTAG00000018287	PREDICTED: Bos taurus glutathione S-transferase M2 (GSTM2), mRNA	GTCAGTTTATCCTGTTACTGTAGCAAAGGGTTCCCTGCTTGAAATAAAACCCTTAGTATG	2.65239	0.996892	0.0357986
39096	A_73_120984	GSTT4	NM_001206623	ref|Bos taurus glutathione S-transferase, theta 4 (GSTT4), mRNA [NM_001206623]	AATGGGACTGCTCCACACTGGACCCGATGGTCAAGGAGAGGATCTGCGATTTGCTGCAGA	0.545875	0.00524088	0.0202006
9312	CUST_266_PI427023673	HAPLN3	ENSBTAG00000001740	Bos taurus hyaluronan and proteoglycan link protein 3 (HAPLN3), mRNA	TTTTCTCTGTTTGGCGAGTGGCCCTCAGGTCTGTGTACTATTTTGGACAATAAATGGTGC	1.39783	0.97332	0.0331075
4831	A_73_P030886	HCST	NM_001076977	ref|Bos taurus hematopoietic cell signal transducer (HCST), mRNA [NM_001076977]	TACGCAGCAGGCCCACCCAAGAAGATGACAAAATCTACATCAACATGCCGGGCAGGGGCT	1.35574	0.973508	0.0346692
18302	A_73_114466	HDDC2	NM_001075401	ref|Bos taurus HD domain containing 2 (HDDC2), mRNA [NM_001075401]	AAATGTTAGGGATGGAGACTTGGAAGCTGAGGGGGAGGGGTTTGAACTAAATAAAATTTT	0.642849	0.00987242	0.0125183
1214	A_73_P071426	HIRA	ENSBTAT00000026497	gb|PREDICTED: Bos taurus HIR histone cell cycle regulation defective homolog A (S. cerevisiae) (HIRA), mRNA [XM_588862]	GCCATTGTGAAGAGAGAGCCCCAGGACGCACGCGGATTATGTGGTCAGTAAACTGACCTG	0.79776	0.0499603	0.0300696
34281	A_73_103997	HKDC1	NM_001191484	ref|Bos taurus hexokinase domain containing 1 (HKDC1), mRNA [NM_001191484]	GAGGCTGCTGTTCGGGGCACCTGTTAATCATTTTACAGGTGGCACATGATAGCTTTTTAA	1.89037	0.994494	0.0344377
1503	A_73_P042563	HMGB1	NM_176612	ref|Bos taurus high mobility group box 1 (HMGB1), mRNA [NM_176612]	TGTCTCTGATGCAGCTTATACGAATAATTGTTGTTCTGTTAACTGAATTCCACTCTGTAA	0.747617	0.0266162	0.0299027
3581	A_73_109651	HNF4A	NM_001015557	ref|Bos taurus hepatocyte nuclear factor 4, alpha (HNF4A), mRNA [NM_001015557]	TGTCACTGCCACCCAACGGGGCAAAGAAGCCAAAAAGATTTCTTACTCTTGTGCGTTTTA	2.75062	0.997521	0.0140841
1540	A_73_120773	HNRNPA0	XM_593096	gb|PREDICTED: Bos taurus heterogeneous nuclear ribonucleoprotein A0 (HNRNPA0), mRNA [XM_593096]	TAGGAGAAAATTGCCTTCCTGGATAGACGTATAGAATAGCAACGTTTATGGATATCACAA	0.692696	0.0115407	0.0388096
15356	A_73_P093036	HNRNPA1	NM_001045911	ref|Bos taurus heterogeneous nuclear ribonucleoprotein A1 (HNRNPA1), mRNA [NM_001045911]	ATTTGGTAATGATGGAAGCAATTTTGGAGGTGGCGGAAGCTACAATGATTTTGGCAATTA	0.71577	0.014856	0.0235219
31680	A_73_P265327	HNRNPA2B1	NM_001045975	ref|Bos taurus heterogeneous nuclear ribonucleoprotein A2/B1 (HNRNPA2B1), mRNA [NM_001045975]	GTAAGAAAGGCTTTGTCTAGACAAGAAATGCAGGAAGTCCAAAGTTCTAGAAGTGGAAGA	0.73111	0.0212566	0.0305112
38260	A_73_P454256	HNRNPM	NM_001191223	ref|Bos taurus heterogeneous nuclear ribonucleoprotein M (HNRNPM), mRNA [NM_001191223]	TGTTTGACAGACCAATGCACGTGAAAATGGATGAGAGGGCCTTACCAAAGGGAGATTTTT	0.713514	0.0164932	0.00514811
43142	A_73_P355226	HNRNPU	NM_001076920	ref|Bos taurus heterogeneous nuclear ribonucleoprotein U (scaffold attachment factor A) (HNRNPU), mRNA [NM_001076920]	CTGTGAGACTGAAGATTATGGAGAGAAGTTTGATGAAAATGATGTGATTACGTGTTTTGC	0.751263	0.0351474	0.0225533
23483	A_73_P417886	HNRPDL	NM_001083725	ref|Bos taurus heterogeneous nuclear ribonucleoprotein D-like (HNRPDL), mRNA [NM_001083725]	TTGTATTCTATTCTGTTGGGTTTATGTCACGGCAAGCACTGAACTGAACAAAATGTTTTC	0.703153	0.0156907	0.0426327
25969	CUST_2590_PI427023673	HOMEZ	ENSBTAG00000032686	PREDICTED: Bos taurus homeobox and leucine zipper encoding (HOMEZ), transcript variant X5, mRNA	ATTATTCAGTGGTTTGGTGACACACGCTATGCCTTGAAGCATGGGCAACTAAAGTGGTTT	0.708148	0.0176908	0.0348569
39190	A_73_100690	HOXB3	NM_001099174	ref|Bos taurus homeobox B3 (HOXB3), mRNA [NM_001099174]	AGACAAGATGGCTAGGCCATCACCAGCCAACCAACCAACTTACCTTTCATGTGGTTAATT	1.6164	0.991267	0.0410182
13699	A_73_P475368	HSP90AB1	NM_001079637	ref|Bos taurus heat shock 90kDa protein 1, beta (HSP90AB1), mRNA [NM_001079637]	TCAGAATATGTGTTTCGCATGAAGGAGACGCATAAGTCCATCTATTACATCACTGGTGAG	0.645643	0.00970718	0.0277057
31564	A_73_P138171	HUNK	ENSBTAT00000027668	gb|PREDICTED: Bos taurus hormonally upregulated Neu-associated kinase-like (HUNK), mRNA [XM_617816]	ATCTACTTCCTCCTAAACAAGAAGCTTGAGCGCTACTTGTCAGGGAAATCTGACTTCCAG	0.600666	0.00650156	0.0169212
13058	CUST_2235_PI427023673	IGF2R	ENSBTAG00000002402	cation-independent mannose-6-phosphate receptor precursor [Source:RefSeq peptide;Acc:NP_776777]	ATGCTTCTGTCCTTGGCCTTTAACGAAAACTGTCCAAAAAAGGGAAGAGTGTTGGTGGTG	0.739761	0.0247864	0.0271527
35379	A_73_P275736	IGSF1	NM_001105048	ref|Bos taurus immunoglobulin superfamily, member 1 (IGSF1), mRNA [NM_001105048]	ATTTGGTATTCATGCTGTTCAAAGAGGGATATGCGGAACCCGTGGATTACCAAGTCCCAA	0.786453	0.0492677	0.0486088
8152	A_73_P047431	IL2	NM_180997	ref|Bos taurus interleukin 2 (IL2), mRNA [NM_180997]	AACGCTGTAGAATTTCTGAACAAATGGATTACCTTTTGTCAAAGCATCTACTCAACAATG	1.38512	0.981649	0.0456003
17624	A_73_P082556	IL37	ENSBTAT00000029311	PREDICTED: Bos taurus interleukin 37 (PREDICTED: Bos taurus interleukin 37 (IL37), mRNA ), mRNA	CCTCTCTATATAAAGCCCCATGTACATGTAAAGTAGCAAAAACATACCTGGAGTCAGTGT	1.31644	0.964988	0.0423304
39474	A_73_115235	ILF3	NM_001206495	ref|Bos taurus interleukin enhancer binding factor 3, 90kDa (ILF3), mRNA [NM_001206495]	ACGGAAGGGATACGTCATCTGTTAATGCTTTTGTGAAGTGAGTTAAACGAGCTTTCTGTA	0.787775	0.0315054	0.0339628
53870	A_73_P058326	IQCK	NM_001192088	ref|Bos taurus IQ motif containing K (IQCK), mRNA [NM_001192088]	AGCGAGTCAAAATCTTCTGGGCCAAACAAGAACAAAAAGTGAAATGCAAAATGGAGGATG	1.6837	0.990778	0.0160101
47143	A_73_118662	IRS4	TC442541	PREDICTED: Bos taurus insulin receptor substrate 4 (IRS4), mRNA	AACCTTGCAACTCTGTATAGTGTTTATATATATATCTGACTTGCCTTTCCATAGAGCTAC	0.602878	0.00670807	0.0409867
45880	A_73_P035611	ITGA6	NM_001109981	ref|Bos taurus integrin, alpha 6 (ITGA6), mRNA [NM_001109981]	GGTTTCATTTCCCTTTCACTAAAACACACAGGCATAACAGATTTGAATGCTAGTTATACT	1.7619	0.992884	0.0312415
14346	A_73_120589	ITGA8	ENSBTAT00000039425	PREDICTED: Bos taurus integrin subunit alpha 8 (ITGA8), mRNA	TCATGCTTTCAGGGACTCACATCTGCTTAATTTAGCCTTGCAAAAAGTTGCATTGATATC	0.337879	0.00233179	0.0261762
5761	A_73_P082421	KCNK12	NM_001205890	ref|Bos taurus potassium channel, subfamily K, member 12 (KCNK12), mRNA [NM_001205890]	AACGTCATCTCCATCCTCATCAAGCAGGTGCTCAACTGGATGCTGCGCAAGCTGAGCTGC	1.61691	0.988796	0.0221412
43977	A_73_P061741	KCNQ1	NM_001205441	ref|Bos taurus potassium voltage-gated channel, KQT-like subfamily, member 1 (KCNQ1), mRNA [NM_001205441]	CCAAGAAGTCCGCCATGGTAAAGAAGAAAAAGTTCAAACTGGATAAGGACAACGGGGTGA	1.30966	0.970768	0.0431536
24807	A_73_115212	KCNT2	TC432094	PREDICTED: Bos taurus potassium channel, sodium activated subfamily T, member 2 (KCNT2), transcript variant X2, mRNA	GTAACCCTATGGGATTTGACTCTGTCTATAGTCTATGTACCATTTTGCTACCAGTTACAT	1.5908	0.99342	0.037312
17654	A_73_120485	KCTD9	NM_001102269	ref|Bos taurus potassium channel tetramerisation domain containing 9 (KCTD9), mRNA [NM_001102269]	CATAACCTAAACCTGCAGAAGAATCTGAAAGATCCAAACACAGTATGCTTAGAAAATGCA	1.46214	0.98771	0.0454832
20000	A_73_P331071	KDM5B	ENSBTAT00000028871	PREDICTED: Bos taurus lysine demethylase 5B (KDM5B), transcript variant X3, mRNA	GATATTGGCCTTTTGGGGATTAAAGAGGAAGCAGAGAAAGTTAAAGGATCCCTTGCCAAG	0.721754	0.0147105	0.0233397
42973	CUST_232_PI427023673	KIAA0895	ENSBTAG00000002011	PREDICTED: Bos taurus KIAA0895 (KIAA0895), transcript variant X3, mRNA	CAAATGTTAAACTGTTTCCCTAAAATGTTTCTGTAGGCTCCAGGGGAAAGTTACTCCTGT	1.25134	0.973142	0.0491054
53924	A_73_108821	KIAA1024	ENSBTAT00000009330	PREDICTED: Bos taurus KIAA1024 ortholog (KIAA1024), mRNA	CACAGATGAATTTTAAGAAGTGCAATATCTTTTCCTACCGAAAGAATGTAATGGATGACC	0.5994	0.00737039	0.0459299
34780	A_73_119681	KIAA1549L	EH200646	PREDICTED: Bos taurus KIAA1549-like ortholog (KIAA1549L), transcript variant X2, mRNA	CCCAAACCAGTCTCTTGTTCGGATGATATTAGGTAGCGTCCTTTTGGTATGCTGGTTGAT	0.713163	0.0138919	0.00700932
26834	A_73_P094586	KIF5C	NM_001076127	ref|Bos taurus kinesin family member 5C (KIF5C), mRNA [NM_001076127]	TACTGTCTCTGTGAACCTGGAACTGACAGCTGAAGAATGGAAGAAGAAATACGAAAAAGA	0.337144	0.00262892	0.045562
27499	A_73_P034891	KLF1	NM_001080359	ref|Bos taurus Kruppel-like factor 1 (erythroid) (KLF1), mRNA [NM_001080359]	TCAGATACTTCTGACAAAGAGACAGACTCTCAGAGAGCTGGACCATCAAACTTGCTCACA	1.51837	0.980364	0.0400289
8880	A_73_111426	KLHL23	NM_001205507	ref|Bos taurus kelch-like 23 (Drosophila) (KLHL23), mRNA [NM_001205507]	AAATCTTCATGCATGTGGAAAGTAATATGCAGAACTGAAATTCACTGTGTTAGTGTAGGG	0.648964	0.00757621	0.0234353
7501	A_73_120733	KLK10	NM_001075890	ref|Bos taurus kallikrein-related peptidase 10 (KLK10), mRNA [NM_001075890]	TCAGTTTAGCCTGACTTGGAAAGCCGGAACAATGAAGTGCTTACCTCATAAAACATGTCA	4.1377	0.997836	0.0106935
10779	A_73_P331481	KRT80	NM_001077952	ref|Bos taurus keratin 80 (KRT80), mRNA [NM_001077952]	AATGCTATATATTATACTACCTGGAGAGACAGCACATGTTCTAGCCAACCCACCCCACTG	1.6003	0.992502	0.00200863
28467	A_73_P041251	L3MBTL2	NM_001075610	ref|Bos taurus l(3)mbt-like 2 (Drosophila) (L3MBTL2), mRNA [NM_001075610]	ATCTACTGTGACGCTGTTCCTTACTTGTTCAAGAAGGTTCGAGCTGTCTACACAGAAGGT	0.766821	0.022693	0.0495092
5167	A_73_P251652	LAPTM4A	NM_205799	ref|Bos taurus lysosomal protein transmembrane 4 alpha (LAPTM4A), mRNA [NM_205799]	GCACTTTCTTTATATAATAGTTTGCATTTTGGTTATTTGCTGCCCTGGATACTTTCAGGA	0.601992	0.00666549	0.0240279
27869	A_73_P255221	LBP	NM_001038674	ref|Bos taurus lipopolysaccharide binding protein (LBP), mRNA [NM_001038674]	GATCGCCAAGTTGCATTTCCAGATGTGCAGCACTTTCCTGGAAATTCTGGGAAAAAGAAG	1.76261	0.996649	0.0390321
8323	CUST_861_PI427023673	LCP1	ENSBTAG00000007079	lymphocyte cytosolic protein 1 [Source:HGNC Symbol;Acc:HGNC:6528]	GAAACACGGGAGGAGTCAGCCATTCCAAAATTTCAACTCGATGACATTATTCACAGTTCC	1.44625	0.990704	0.0278391
22665	A_73_P362966	LDHA	NM_174099	ref|Bos taurus lactate dehydrogenase A (LDHA), mRNA [NM_174099]	TGCTTGTTGTTTCCAATCCAGTCGATATTTTGACCTATGTGGCTTGGAAGATAAGTGGCT	2.12134	0.996413	0.0215835
12792	A_73_118504	LEMD3	NM_001192699	ref|Bos taurus LEM domain containing 3 (LEMD3), mRNA [NM_001192699]	CTTATTTTACCTGAAACTGTTAAGCCGACCAAGATCCCTCCCTGCAAGACAGATGGGAAT	0.782051	0.0397409	0.0451779
7048	A_73_111961	LEPR	NM_001012285	ref|Bos taurus leptin receptor (LEPR), mRNA [NM_001012285]	GTTGTTTTGGGAAGATGTTCCAAACCCCAAGAACTGTTCCTGGGCACAAGGACTTAATTT	0.576923	0.00395228	0.0192564
13986	CUST_807_PI427023673	LHX2	ENSBTAG00000010990	LIM homeobox 2 [Source:HGNC Symbol;Acc:HGNC:6594]	CAACGGTCGCTTTGTTGTTTTAGAATTTTAAGGTGGAAGTCTGTTCGAATATCAGAATTT	0.637672	0.00855944	0.0169255
17535	A_73_P266961	LMO7	ENSBTAT00000014167	PREDICTED: Bos taurus LIM domain 7 (LMO7), transcript variant X40, mRNA	CAACCGATTTCTCAGAAAGCCTTCAGAGTTCTAATACTGAATCAAAAGAAATCAATGGAA	1.44987	0.978646	0.0455359
34348	A_73_104078	LOC100125231	NM_001103311	ref|Bos taurus melanoma antigen family D, 4-like (LOC100125231), mRNA [NM_001103311]	TGACACACTCTATGCCCTTCCTGCTTTCATTGTGTGCTTTTCTCGTGCTGTCGTGTTTTG	0.507544	0.00390613	0.0415197
31805	A_73_P210222	LOC100137784	XM_001789096	gb|PREDICTED: Bos taurus amphiphysin I variant CT4-like (LOC100137784), partial mRNA [XM_001789096]	ACCAACAACTCAGATTTATCTGAAGATGAAATTGCTAACCAGAGATATGGATTGTTGTAC	0.589021	0.00682491	0.0181873
50511	A_73_P167462	LOC100298064	BE722324	PREDICTED: Bos taurus hepatitis A virus cellular receptor 1 (LOC100298064), transcript variant X2, mRNA	CCACCCTAGAGTTGAGGATCAATCCAGGTGAGCTTATCTTCCTACTTCTTTGATCACTTC	0.445236	0.00296808	0.0317913
21153	A_73_P449666	LOC100336282	ENSBTAT00000000555	PREDICTED: Bos taurus uncharacterized LOC100336282 (LOC100336282), mRNA	GCTGGTAGAGAAAAGCTTTGAAACAGATATAAACCTAAACTCCCAAAACCTGTCAGTGAT	1.39688	0.98941	0.0217432
26068	A_73_109102	LOC100847724	BC148021	PREDICTED: Bos taurus WAP four-disulfide core domain protein 18 (LOC100847724), mRNA	AAATGGTGGGATGTCTGCTTTCTAAAGAGCCTGTGTGGAAAATAAACTAAATTTGTGGCA	2.22077	0.994944	0.0457937
23420	A_73_P148521	LOC100847738	A_73_P148521	Bos taurus NKG2-A/NKG2-B type II integral membrane protein-like (LOC100847738), mRNA	AGCGCTGATTCTTCTTGTTCCCATGAAGATTCTGAGGAGCATTTTGAAGATTTAATTCTA	0.73113	0.0281198	0.0285359
15035	A_73_P162112	LOC100847839	FE018506	PREDICTED: Bos taurus uncharacterized LOC100847839 (LOC100847839), ncRNA	ATAACAGAGTCCCTCTATGCTTCTAGGCCGGTAGGCGTGGACTGTTTTATGAGAGAAAAA	1.40633	0.978127	0.0278377
4761	A_73_P104836	LOC101902234	BC142083	PREDICTED: Bos taurus uncharacterized LOC101902234 (LOC101902234), ncRNA	CCTGCTGATTCGAAAGACATTAATCCTGCCTACAAAAAGTTTAGAAAATACAGAAAACTG	0.40521	0.00251948	0.0262363
40170	A_73_116302	LOC101904753	TC438209	PREDICTED: Bos taurus chromobox protein homolog 1 (LOC101904753), mRNA	TGAGTCATGAGATCCATCAGTTGTTGACATCATCTTGATCTGCATCTAGAACTCCATTGT	0.695591	0.0165289	0.0490777
2252	A_73_100083	LOC101904855	A_73_100083	PREDICTED: Bos taurus uncharacterized LOC101904855 (LOC101904855), transcript variant X2, ncRNA	AAGAGGCCCCCAGGGGAGTGAGGAAGGAGACATTGGAAGGGTGCAGCCCACCCTTGACTT	1.37456	0.981457	0.0385144
53331	A_73_115377	LOC104968427	ENSBTAT00000022486	PREDICTED: Bos taurus cilia- and flagella-associated protein 57-like (LOC104968427), mRNA	AAGTTCACCCGCTCCCAAGTCTATGACCTTGAAGCAGCTCTGAAACTGACCAAGAAAATT	1.66382	0.994792	0.0249658
8438	A_73_107376	LOC104973218	TC440609	PREDICTED: Bos taurus uncharacterized LOC104973218 (LOC104973218), ncRNA	CAATGGAAAAGCACATAAACCTCTATACACACAAGTTTTCTCATTTGTAAAGTGGGAATG	1.49948	0.989938	0.0398021
52824	A_73_P058031	LOC104975830	ENSBTAT00000048696	PREDICTED: Bos taurus zymogen granule protein 16 homolog B-like (LOC104975830), transcript variant X2, mRNA	ATCAAGAAAGTGCTACCTAATCCCCAAATATGTCTACGAAATGAGCACTTCTGGGTCTCC	6.82815	0.998165	0.0351561
46443	A_73_111087	LOC104989098	A_73_111087	PREDICTED: Bison bison bison GTPase IMAP family member 4-like (LOC104989098), partial mRNA	CTGTAGGAAATCTTTGACCAACAACATCCAGTTTGCTGAATAACCAGTTCTCTCTGTTTC	1.55274	0.992733	0.0172354
40889	A_73_110364	LOC107131254	TC415797	PREDICTED: Bos taurus protein very KIND-like (LOC107131254), mRNA	TGGCCCTAACATAGCTTTCATGTGAGAATTCGGTTCTGCAGATGAACTCCTGGGTTTTCA	0.498911	0.00354213	0.0443918
1442	A_73_P494048	LOC107133200	XM_001253208	PREDICTED: Bos taurus olfactory receptor 1052-like (LOC107133200), mRNA	ATAAAGATGTCAAGGCTGCTTGGCTCCGGCTCATTGATCGCCCATCTGCTCTGGGGCTGA	1.74876	0.991361	0.038759
43934	A_73_P108131	LOC112446130	M38483	PREDICTED: Bos taurus U1 spliceosomal RNA (LOC112446130), ncRNA	TGTGGGAAACTCGACTGCATAATTTGTGGTAGTGGGGGACTGCGTTCGCGCTTTCCCCTG	0.492294	0.00383648	0.00723717
18257	CUST_593_PI427023673	LOC521656	ENSBTAG00000000258	Bos taurus cytochrome P450, family 2, subfamily J (LOC521656), mRNA	TCATCTGGGAAATAGAAGGTGGACAATGATTTCTTCTCTAAAGCAAAAACTAATGCAAAG	1.74928	0.991203	0.0499279
9498	CUST_115_PI427023673	LOC522763	ENSBTAG00000001308	PREDICTED: Bos taurus uncharacterized LOC522763 (LOC522763), transcript variant X1, mRNA	GATGTTGCTTCCTGCTTCTCTGGGACTCAGGCATAATTTGAACTATATAAATGTGCACAA	1.82979	0.995956	0.0130155
1368	A_73_P031341	LOC525947	NM_001046279	Bos taurus serotransferrin-like (LOC525947), mRNA	TTCTGCTGGCTGGAACATCCCCATGGGTTTCCTATACAATCAGACTGGGTCATGTAAATT	6.10927	0.998337	0.00633348
9198	A_73_101376	LOC539805	XM_589610	PREDICTED: Bos taurus uncharacterized LOC539805 (LOC539805), transcript variant X2, mRNA	TCCTTCTGGCCTTGTCTGTTAGAGGACAGGGATCCTCGGCTGGGCCTACTCCCCAATAAA	1.45608	0.985491	0.00834507
17166	A_73_P085281	LOC616427	ENSBTAT00000054509	PREDICTED: Bos taurus protocadherin beta-2 (LOC616427), mRNA	TATTCAGTGGCTGAGGAAATGAACAGTGGCTCCTTTGTGGCCAATCTATTGAAAGACCTG	0.636184	0.0099952	0.0311672
5342	A_73_P226117	LOC617199	XM_869410	gb|PREDICTED: Bos taurus ATPase, aminophospholipid transporter-like, class I, type 8A, member 2-like (LOC617199), mRNA [XM_869410]	AACATAGGTATCTGGGTGGTAAACCTGAGAAGAACTTTTGGAACCTCGGTCAATGGTCTC	0.708469	0.0158329	0.0259474
37465	A_73_P046586	LOC768255	NM_001078121	Bos taurus GTPase, IMAP family member 4-like (LOC768255), mRNA	TCTGTAGGAAATCTTTGACCAACAACAACCAGCTTGGTGAATAACCAGTTCTCTCCTTTT	1.50328	0.989073	0.0398081
18956	A_73_P061027	LOC785107	ENSBTAT00000053023	PREDICTED: Bos taurus olfactory receptor 147 (LOC785107), mRNA	CTATGGATGAAGGAAAAATCTCTTCTGTTTTTTACACTAATATGGTTCCTTTGCTGAACC	1.57768	0.99089	0.0360945
36066	A_73_119496	LOC788634	A_73_119496	PREDICTED: Bos taurus BOLA class I histocompatibility antigen, alpha chain BL3-7-like (LOC788634), mRNA	CCAAAGTATCTACACTTCTTGAATCATTCATGCAAACAGGGGAATCATTAGAGCTGAATT	1.59348	0.991847	0.0109758
36876	A_73_117336	LPIN2	EH206833	PREDICTED: Bos taurus lipin 2 (LPIN2), transcript variant X6, mRNA	CCATTGCCATTTGGTACAAATGACATTTGTTCTTTCTGTGAAAGAGAGATGCCCTCGGTG	0.69809	0.0116793	0.0487714
50680	A_73_P037696	LRFN5	NM_001081610	ref|Bos taurus leucine rich repeat and fibronectin type III domain containing 5 (LRFN5), mRNA [NM_001081610]	GAGTTCTGTATCAATCCATGTTACATTGCCATCCATGATTTAAGACTGTAGAATCTTGAA	0.399461	0.00258182	0.0303231
19826	A_73_P110446	LRMP	ENSBTAT00000026270	gb|PREDICTED: Bos taurus lymphoid-restricted membrane protein (LRMP), mRNA [XM_001790052]	TTATGATACATTAGCTTCCTGGGCAACAAACCTCAAGACGTCCATCAGAGAGGCCAACAA	1.38473	0.978842	0.0369212
32576	A_73_112710	LRP8	NM_001097565	ref|Bos taurus low density lipoprotein receptor-related protein 8, apolipoprotein e receptor (LRP8), mRNA [NM_001097565]	TATATTTACAGAGGGCTTTTGGTTTGGAGGGTCTTTTTTAGGTTTCAGAGTTATGTTTTG	0.593364	0.00600464	0.00259597
22357	A_73_P134891	LRRC4B	CO894968	Bos taurus leucine rich repeat containing 4B (LRRC4B), mRNA	AGACTCTTTTGATACTGAAGGGAGGTTTGCGTCAACGACTACCTGCTCTGTAATTACTTT	0.265244	0.00168934	0.000316921
42966	A_73_P073296	LRRCC1	NM_001206791	ref|Bos taurus leucine rich repeat and coiled-coil domain containing 1 (LRRCC1), mRNA [NM_001206791]	CATCGAGTTGAAGAAGAAATGCGTGGACTTCTGGAAGAAACATGCAAGAACAAAAAAGCA	0.786137	0.0363651	0.0384261
6784	A_73_P048381	LTF	NM_180998	ref|Bos taurus lactotransferrin (LTF), mRNA [NM_180998]	AGAATATTTGGGGACAGAGTATGTCACGGCCATTGCCAACCTGAAAAAATGCTCAACCTC	12.9496	0.998488	0.0107053
30520	A_73_101726	LURAP1L	NM_001101256	Bos taurus leucine rich adaptor protein 1 like (LURAP1L), mRNA	GTTTTCAGAGCAAGGGGTCAGGGATTACAAGATAAACTTTGCTAAATTTTACAATAAACC	1.43071	0.990294	0.0279784
16462	A_73_P292806	LUZP1	NM_001205828	ref|Bos taurus leucine zipper protein 1 (LUZP1), mRNA [NM_001205828]	AGGAGGAGCTTAAGAAAATGAGGGCCAAAAATAATGATCTGCAGGATAATTACCTAAGTG	0.560483	0.00457417	0.00482249
43651	A_73_P094581	LYPD6B	ENSBTAT00000026237	gb|PREDICTED: Bos taurus LY6 [XM_868675]	AAGGAAACTTCCAGTTGAACTAATATGAAACCTATTTGCTAATTGTGGGGGGAAATAAAG	1.35039	0.979873	0.0436823
31219	A_73_P270161	MAOB	NM_177944	ref|Bos taurus monoamine oxidase B (MAOB), nuclear gene encoding mitochondrial protein, mRNA [NM_177944]	TTGTATCCTCCACTGAATCTGGATACAAAGGTTGGTGCACATTTGGGTAATTCAAATAAA	0.47058	0.00253461	0.0363762
44132	A_73_104573	MAP1LC3A	NM_001046175	ref|Bos taurus microtubule-associated protein 1 light chain 3 alpha (MAP1LC3A), mRNA [NM_001046175]	GTCATGTTAGGGGGTTGATCTTCTGGGTGCTGGCTGGGATTGGGGAGAGTGGGGAGCAGC	0.743289	0.0309612	0.0321824
9806	A_73_P046006	MAP3K8	NM_001099071	ref|Bos taurus mitogen-activated protein kinase kinase kinase 8 (MAP3K8), mRNA [NM_001099071]	CTGTGTTAAACCACATAATGTCTGTACATCCCAAAGGATGAGAATATGACCTTTAAGAAA	1.48565	0.986136	0.0343819
25284	A_73_119006	MAPK8	NM_001192974	ref|Bos taurus mitogen-activated protein kinase 8 (MAPK8), mRNA [NM_001192974]	TCGGGGGGTGGGAGGGATGGGCAGTTGTTTAGTCATTGATAGAACTACTTTGAAAACAAT	0.779485	0.0357287	0.0418005
25119	A_73_113652	MAPK8IP1	NM_001102508	ref|Bos taurus mitogen-activated protein kinase 8 interacting protein 1 (MAPK8IP1), mRNA [NM_001102508]	AGCCCCATTCTAGGTCCTGTGACCCCGGCCTCAACTATTAAAGTGCCATTTCCTGTCGGG	2.04175	0.995391	0.0265547
37179	A_73_P297611	MAPKAP1	NM_001081603	ref|Bos taurus mitogen-activated protein kinase associated protein 1 (MAPKAP1), mRNA [NM_001081603]	AAACTGAACAGACGTACAAGCTTCAGCTTCCAGAAGGAAAAGAAATCAGGGCAGCAGTGA	0.791004	0.0500414	0.0427587
32144	A_73_P041686	MARCKSL1	NM_001076172	ref|Bos taurus MARCKS-like 1 (MARCKSL1), mRNA [NM_001076172]	AAACCATTCTCTTCCACCTGGTTTTACTGTAACATTTGAAAAAGGAATAAATGTTGTCCC	0.623547	0.00833214	0.0484949
44230	A_73_P109621	MAT1A	ENSBTAT00000031299	PREDICTED: Bos indicus methionine adenosyltransferase 1A (MAT1A), mRNA	TGAAACTCGAGTCTTTATTTGTTAATAGTGCGTGCTAAGCCAGTGAATAAAATCTTGAGA	2.33942	0.997245	0.0496545
30228	A_73_P450811	MATR3	NM_001102486	ref|Bos taurus matrin 3 (MATR3), mRNA [NM_001102486]	TCCTGACACTGATACAGGACATACAATGGGGGATCCATTCATGTTGCAGCAGTCTACAAA	0.74914	0.0268207	0.015388
30144	A_73_121355	MEGF9	TC419130	PREDICTED: Bos taurus multiple EGF like domains 9 (MEGF9), partial mRNA	ATGTCACTAAAATTCTAACGCACATCTTAAAAACATGTCTCATACATATGCTGGACTAGG	0.721649	0.019596	0.046395
34946	A_73_P091826	MEI1	ENSBTAT00000028212	gb|PREDICTED: Bos taurus hypothetical LOC516011 (MEI1), mRNA [XM_594137]	TTCATCTGGGGCCATTTACTCCGTCACTGGAACAGAATCAGGAAATAAAGTGAAACACTC	0.723134	0.0194156	0.0391712
28432	CUST_2354_PI427023673	METTL16	ENSBTAG00000017440	PREDICTED: Bos taurus methyltransferase like 16 (METTL16), transcript variant X1, misc_RNA	CAAGCTGAATTCCATCATTAGCCCACTAGTAACATTATGTGGAATTGTCTTAAAAAACCA	0.730499	0.0262782	0.0297653
42115	A_73_113782	MFSD2B	TC418064	PREDICTED: Bos taurus major facilitator superfamily domain containing 2B (MFSD2B), mRNA	AAATCACAGGAACCACTACTTTCTAAAGGCCACCATGTCTTTGGGGAAGAAAGATCTACT	0.542344	0.00508434	0.0228251
20560	A_73_P346536	MGC127055	NM_001080364	ref|Bos taurus hypothetical protein LOC785824 (MGC127055), mRNA [NM_001080364]	CAACCTGCTCCTCAGCCGTAGCCCTGATGGTCAATAAACCGGGGTCTGGTGGTTCAAAAA	1.85205	0.994059	0.0232402
50148	A_73_P040496	MGC148609	NM_001102349	ref|Bos taurus hypothetical protein LOC788407 (MGC148609), mRNA [NM_001102349]	TTTCTTAGATTCAGTGTTTGTCTGTTGGCGCCCACTCACAAATGATGGGGCCAAACAAAC	1.37293	0.984532	0.0192336
16217	A_73_P042956	MGC152301	NM_001099190	ref|Bos taurus hypothetical protein LOC783682 (MGC152301), mRNA [NM_001099190]	CTGCTCTGGACCTTTAATCTCTGTATCCTTAAAGCTATAAATATGATGGAAGCAAATTAC	1.42692	0.982979	0.0230666
2253	A_73_P102781	MIF	NM_001033608	ref|Bos taurus macrophage migration inhibitory factor (glycosylation-inhibiting factor) (MIF), mRNA [NM_001033608]	AACTCCCCTGCTAAATGTACTTATCAGATGGAAATAAATCAAGTCTCTGTTTATAAGGTC	2.16214	0.995715	0.0103667
48825	CUST_2374_PI427023673	MISP	ENSBTAG00000020269	PREDICTED: Bos taurus mitotic spindle positioning (MISP), transcript variant X3, mRNA	ACTCTTGAGTTCTGGGAGGAAAGAGACCAGTCCTCTCACCTCCTGATATAATTATTACGG	1.66258	0.993862	0.0035547
40291	A_73_P032176	MITF	NM_001001150	ref|Bos taurus microphthalmia-associated transcription factor (MITF), mRNA [NM_001001150]	TGGAAGACATCCTCATGGACGATACCCTTTCTCCTGTTGGCATAACTGATCCACTTCTTT	0.601552	0.0088498	0.0388913
49840	A_73_P106091	MKRN2	NM_001045989	ref|Bos taurus makorin ring finger protein 2 (MKRN2), mRNA [NM_001045989]	AAAGGACGTTGGTACTGAGAGACCGAAATCTCTCCGGCATGGCTGAAGACAGGACCTGCC	0.784487	0.0276001	0.0427051
3080	A_73_P392836	MPP6	ENSBTAT00000054769	ens|MPP6 protein Fragment [Source:UniProtKB/TrEMBL;Acc:A7E3B6] [ENSBTAT00000054769]	TATACTCAAAGAGCCTCACTTCCAGTCACTCTTGGAGGCCCATGATATTGTGGCATCAAA	0.608288	0.00647592	0.0173279
7544	A_73_P167587	M-SAA3.2	CR850558	gb|CR850558 Normalized and Subtracted bovine endometrium tissues (bcbp) Bos taurus cDNA clone bcbp0005.d.02 5', mRNA sequence [CR850558]	TTTCCAGTAACGCAGAGAACTATTCAGGGATCACAGACCCTCTGTTTAAGGTATGACCAG	10.6565	0.99844	0.0326069
9948	A_73_108630	MSI1	DN520083	PREDICTED: Bos taurus musashi RNA binding protein 1 (MSI1), transcript variant X4, mRNA	CTATTAGCCCTGAGAACACAAAGCAATAATCTTTGTTACTGAGATGCGCGGCTGTTCGTG	0.605151	0.00617378	0.028101
29956	A_73_P192542	MURC	NM_001103264	ref|Bos taurus muscle-related coiled-coil protein (MURC), mRNA [NM_001103264]	ATCTTGGGTTTGAGTTGGGTCTTAAAACATTTCCTGGAAAATTCTTCTCTGATTATCTTC	0.627765	0.00929806	0.0373154
29556	A_73_101212	MXD3	NM_001193259	ref|Bos taurus MAX dimerization protein 3 (MXD3), mRNA [NM_001193259]	TTCCTAAACAAGGGCCCCTGGCCTTTGCCCCACGCATACTGTATTTTCATTAAAAGCCTC	1.41918	0.986601	0.0342247
1173	A_73_P049611	MYADM	NM_001075252	ref|Bos taurus myeloid-associated differentiation marker (MYADM), mRNA [NM_001075252]	TAGTTAGGAATCGAGCCCCCTTTCTCCCAGTGGGGTTGGGGGTGTGTGTACAGTGTTCCT	1.88557	0.994143	0.0133199
51915	A_73_P274971	MYBBP1A	ENSBTAT00000009771	tc|Rep: Myb-binding protein 1A - Homo sapiens (Human), partial (35%) [TC410756]	GAGCTGCTCAACACTCTGTTCAGGAATTTCCATCATGAGAAGCTGACCATGGACCTGACC	0.719347	0.0291433	0.0403277
51496	A_73_109996	MYL6B	NM_001075713	ref|Bos taurus myosin, light chain 6B, alkali, smooth muscle and non-muscle (MYL6B), mRNA [NM_001075713]	CACCAGGCAAAAGCACGTTCCTGCCACTAGGAGGCTATTGTTTCAAAATAAAGAGACGTT	0.489942	0.00298939	0.0354802
51649	A_73_P336461	MYOT	NM_001075335	ref|Bos taurus myotilin (MYOT), mRNA [NM_001075335]	CTGGTTTGTGAAGCCTACCAGAAAATCTGGATTTGTATATTGTAGAAGATCTTTGACAAA	0.673459	0.0109748	0.0199856
6622	A_73_113051	N4BP2	ENSBTAT00000000200	gb|PREDICTED: Bos taurus phosphonoformate immuno-associated protein 5-like (N4BP2), mRNA [XM_587938]	ATGAGAGTAAGACTTGTCCAAGTAAAAAGATTCATAGGGAACACACATTGTCTCTTCCTT	0.768147	0.0359427	0.0392276
36731	A_73_P222122	NDP	NM_001046090	ref|Bos taurus Norrie disease (pseudoglioma) (NDP), mRNA [NM_001046090]	CACCACTATGTTGATTCTATCAGTCACCCGCTATACAAGTGTAGCTCCAAGATGGTACTC	0.367478	0.00242644	0.0257129
19016	A_73_P402596	NOL8	NM_001191213	ref|Bos taurus nucleolar protein 8 (NOL8), mRNA [NM_001191213]	ACAGAAGCTCATGAATTTGCAGTCTCACTTTGGCACTGATGACAGATTTCGCATGGACTC	0.65651	0.00802975	0.00114756
16338	A_73_P493323	NP13359656	NP13359656	tc|GB|XM_001787950.1|XP_001788002.1 similar to rCG39876 [NP13359656]	AATGATCCAAGCGTAATAAAACAACAAGGAACAGGGGAGTCCAGGACTGAGATAAAGGTT	1.40091	0.978646	0.0359718
8384	A_73_106974	NP9556818	NP9556818	tc|GB|XM_612940.3|XP_612940.3 similar to carboxypeptidase B [NP9556818]	GATCTGGATTCAGAGGTATCCATCGCGTTCACTCTCAAAAATGATGAACCCATTAGGGCT	0.601066	0.00848244	0.0304893
25939	A_73_115435	NPEPL1	NM_001034297	ref|Bos taurus aminopeptidase-like 1 (NPEPL1), mRNA [NM_001034297]	TGTCTACTCGGGCCCCTCTGAGTTCACTGCAAGTTGAATTAAACATGGCTAAACCACACC	1.32931	0.982113	0.0447445
35878	A_73_112384	NPM1	NM_001035441	ref|Bos taurus nucleophosmin (nucleolar phosphoprotein B23, numatrin) (NPM1), mRNA [NM_001035441]	GGAATAGTAGTAGTGGTGGTCAGACAGATGGAAATGGTGGGGAGACAAAAATATACATGT	0.69742	0.0188542	0.0430086
21499	A_73_P036186	NPPC	NM_174125	ref|Bos taurus natriuretic peptide C (NPPC), mRNA [NM_174125]	AAAGGAGGCAACAAGAAGGGTTTGTCCAAGGGCTGCTTCGGCCTCAAGCTGGACAGGATC	0.195654	0.00160851	0.0103208
35555	A_73_111682	NPY	NM_001014845	ref|Bos taurus neuropeptide Y (NPY), mRNA [NM_001014845]	CTATGTGGTGATGGGAAATGAAACTTGCTCTCCAGTCTCTGCCTCTTTTTCAGCCCCCAT	0.21229	0.00164254	0.00861342
36137	A_73_P042121	NPY5R	NM_001102527	ref|Bos taurus neuropeptide Y receptor Y5 (NPY5R), mRNA [NM_001102527]	TGACTTAAGGTCTCTTATACACTGTCTGCATATGTCATAATTCTCAGTGTTTACTAAGGA	0.409912	0.00236507	0.0222359
16852	A_73_115586	NRG1	NM_174128	ref|Bos taurus neuregulin 1 (NRG1), mRNA [NM_174128]	TGTTAAGTTGTAACCAGTACACACTTGAAATGATGGTAAGTTCGCTTCGGTTCAGAATGT	0.388945	0.00260006	0.0427758
30606	A_73_P047691	NT5E	NM_174129	ref|Bos taurus 5'-nucleotidase, ecto (CD73) (NT5E), mRNA [NM_174129]	GGCTACATTTTTTATGCCTGGCCAGTAAAATAGGGTAAACCCTATTGAAACACAAATTTT	2.4488	0.997481	0.0221451
42799	A_73_103532	NTRK1	XM_613650	gb|PREDICTED: Bos taurus neurotrophic tyrosine kinase, receptor, type 1, transcript variant 1 (NTRK1), mRNA [XM_613650]	TGGGAGTGCAGGATGTTCCTGCTTTCTCTAGGCAGGGTTCCGTCATAGCAATTATATTTA	0.438005	0.00336725	0.0470638
16327	CUST_239_PI427023673	NUP155	ENSBTAG00000002458	Bos taurus nucleoporin 155 (NUP155), mRNA	GGTCCAGTTCCGTAATAGTAGATTCTACAACAGTTCTTAAATAAGCAAATAAACAGTCTC	0.768867	0.0353628	0.0274235
14617	A_73_111660	OLFM2	NM_001205320	ref|Bos taurus olfactomedin 2 (OLFM2), mRNA [NM_001205320]	TTTGCGCCCAGCTTTCATTCTGTGCCTCTGTATTTCTATTGGTGCGTTTTCTCTGTATTG	0.408766	0.00216211	0.0258746
45592	A_73_P084936	OR2T33	ENSBTAT00000053471	PREDICTED: Bos taurus olfactory receptor, family 2, subfamily T, member 33 (OR2T33), mRNA	CCCCTGTGTTGAACCCCCTTATATATAGTGTGAGGAATAAAGATGTCAAGGGGGCTTTGA	1.38045	0.974693	0.0457865
26703	A_73_P141471	OSBPL1A	ENSBTAT00000007419	gb|PREDICTED: Bos taurus oxysterol-binding protein-like 1A (LOC512449), partial mRNA [XM_589966]	TTATTAAATGCTTCGATGACACTGTTCATAGCTTCAGGGTTCCCAAGAACAGCCTTCAGC	0.738262	0.0253013	0.0326217
45318	A_73_P373796	PABPC4	NM_001083724	ref|Bos taurus poly(A) binding protein, cytoplasmic 4 (inducible form) (PABPC4), mRNA [NM_001083724]	AGAAGCAGATGCTGGGTGAACGTCTGTTCCCACTCATCCAGACGATGCACTCGAACCTGG	0.673857	0.0115337	0.0186643
18611	A_73_111620	PAG1	TC446649	PREDICTED: Bos taurus phosphoprotein membrane anchor with glycosphingolipid microdomains 1 (PAG1), mRNA	AAAGGAACCTGGTTGAAGTGCTATTATGTAGTGTGGGCTACAGAAAAGAAGCTTTTCCTA	0.75576	0.0246889	0.0467597
19603	A_73_P101296	PAG2	NM_176614	ref|Bos taurus pregnancy-associated glycoprotein 2 (PAG2), mRNA [NM_176614]	CTTGGTGATATCTTCCTGAGGCAGTACTTCTCGGTTTTTGATCGTAAAAATAGAAGGATT	1.31801	0.970671	0.041289
34355	A_73_104944	PCDH17	TC434590	PREDICTED: Bos taurus protocadherin 17 (PCDH17), transcript variant X1, mRNA	AACGCTATTGTTTAATGGCTGTGTTTAATGTGACCTATCTGGAAAATGAGGACTCTGAAT	0.739314	0.0242787	0.030908
18442	A_73_P078071	PCDH19	ENSBTAT00000030214	gb|PREDICTED: Bos taurus protocadherin 10 (PCDH19), mRNA [XM_602429]	ACATCATCACACTGTCCATTGAAGCTACTGCTGCTGATGTTGAAGCTTATGATGACTGCG	0.693269	0.0126087	0.00390171
33721	A_73_P073786	PCSK2	ENSBTAT00000052049	PREDICTED: Bos taurus proprotein convertase subtilisin/kexin type 2 (PCSK2), transcript variant X1, mRNA	GATTCTTTTCATTCCCATGGAAGCAACCTTTTCTATTCTGTGCCCCAAATACAATGCTCC	0.623737	0.00788862	0.0137459
26848	A_73_110325	PCSK5	ENSBTAT00000036658	gb|PREDICTED: Bos taurus proprotein convertase subtilisin [XM_606509]	GAAGTGCAGTGAAAACTGCAAGACATGTACTGAATCTGACAACTGTACAGAATGCAGGGA	0.436709	0.00293711	0.0357401
24165	A_73_P094261	PDE11A	NM_001205422	ref|Bos taurus phosphodiesterase 11A (PDE11A), mRNA [NM_001205422]	TGAAGGTCAATGTGAAACTGAAGCCAATGTTGGATTCCGTGGCCACCAACAGAAGTAAGT	0.372231	0.00228578	0.0436864
14023	A_73_110056	PDGFD	NM_001083706	ref|Bos taurus platelet derived growth factor D (PDGFD), mRNA [NM_001083706]	GGAGGGGCAGAGCAAAGCACATGGCTCTCGTTGACATCCAGTTGGATCATCATGAGCGGT	0.763715	0.0241531	0.0302227
23995	A_73_104677	PDLIM1	NM_001035455	ref|Bos taurus PDZ and LIM domain 1 (PDLIM1), mRNA [NM_001035455]	CTCTGCTGCAAATGGACATCAGCCAAATTCAAACCAAACTGAATTTAATATGTCTGATGA	1.6436	0.99364	0.00525311
3744	A_73_110032	PDP2	TC417859	PREDICTED: Bos taurus pyruvate dehyrogenase phosphatase catalytic subunit 2 (PDP2), mRNA	TGACACCTCCGGCACCTGACATTTAGCTAACCTCCTGGGAAATATTTCGTATCAAGCATT	1.55301	0.988552	0.0296958
23486	A_73_P122351	PELP1	ENSBTAT00000028337	gb|PREDICTED: Bos taurus proline, glutamic acid and leucine rich protein 1 (PELP1), mRNA [XM_001254201]	ACGAGGAGGAAGACTTTGAGCTGGAAGAGCTGGAAGAGGTAGAGTTCGGCCCGGCTGGCG	0.755372	0.0306614	0.0448928
45906	A_73_P276416	PEX11A	NM_001075721	ref|Bos taurus peroxisomal biogenesis factor 11A (PEX11A), mRNA [NM_001075721]	GCATCTCTTATGTGCATATTAGGAGCTCAGTGTTTGCTAAGTGAATAAAAATTGAAAGAG	0.782118	0.0331552	0.0431433
7900	CUST_1912_PI427023673	PF4	ENSBTAG00000011961	Bos taurus platelet factor 4 (PF4), mRNA	CAGCAGAATCCTCTGTATAAGAAAATAATCAAGAGGCTTTTGAAGAGTTAGTTGCCTAAA	1.53167	0.989951	0.0478459
28501	A_73_P091426	PHC1	NM_001205756	ref|Bos taurus polyhomeotic homolog 1 (Drosophila) (PHC1), mRNA [NM_001205756]	GTGGCAGCTTTGACGTTTCTCTGGGTTTTATTTTTTAAATCTTCTCAATTCTCACCTACC	0.727817	0.0156143	0.0348607
20406	A_73_109083	PHC2	NM_001192908	ref|Bos taurus polyhomeotic homolog 2 (Drosophila) (PHC2), mRNA [NM_001192908]	CAGGAGATTTTCCTTTCCAGATTGTTGTGGTGTCTCTGCAGCCCTTTCCTGCACTGTGAC	0.692927	0.0123761	0.0255815
36899	A_73_P341706	PHF14	ENSBTAT00000015687	PREDICTED: Bos taurus PHD finger protein 14 (PHF14), mRNA	GAAGGTTCCTGTAGTGATTCTGAAGAAAATATTTTAGAGGAAGAACTGAATGAAGACGTT	0.727459	0.0233837	0.0231784
15932	A_73_P325366	PHYH	NM_174142	ref|Bos taurus phytanoyl-CoA 2-hydroxylase (PHYH), mRNA [NM_174142]	GCATGGGTAATTCTGCAGTATGGTGGGATGCTTTAATGGATATAAAATAGTAAAAGTGAA	1.71709	0.994671	0.00319811
7374	A_73_114065	PI16	NM_001024487	ref|Bos taurus peptidase inhibitor 16 (PI16), mRNA [NM_001024487]	GTAGGGAGCAGGGACCAGGGAAGGGAGGTGGCCCCTGACTCCGGAATAAAAGCCTGTGTA	4.73831	0.997771	0.0337761
31251	A_73_P074601	PI3	NM_001080353	ref|Bos taurus peptidase inhibitor 3, skin-derived (SKALP) (PI3), mRNA [NM_001080353]	CAAGATCCAGTGAAAGGTCAAGATCCAGTGAAAGGTCAAGATCCAGTCAAAAGGCAAGAC	17.3995	0.998517	0.00619944
19426	A_73_106499	PIK3R4	NM_001100314	ref|Bos taurus phosphoinositide-3-kinase, regulatory subunit 4 (PIK3R4), mRNA [NM_001100314]	TGTGTGTCTCAGCTGGAATTAGCTAGACAGCAGTATCTGGCGCTTTTCTTACTGTATATA	0.73566	0.0252639	0.0449271
29217	A_73_P255271	PINK1	NM_001099701	ref|Bos taurus PTEN induced putative kinase 1 (PINK1), nuclear gene encoding mitochondrial protein, mRNA [NM_001099701]	TAAAAGGTAAAAACCATTTTTAGCTTGCAGGCCTGCAAAAATCAGGCAGCAAGCCAGACC	0.768921	0.024529	0.0448002
11538	A_73_P050901	PISD	NM_001024475	ref|Bos taurus phosphatidylserine decarboxylase (PISD), mRNA [NM_001024475]	AGTGCCTAGAAAACCTGTCCCCAAGTAACAGATACTAACAAACAGGTACGAAGTCCTGAG	0.649065	0.00854213	0.0234381
27217	A_73_115944	PLAC8	NM_001076987	ref|Bos taurus placenta-specific 8 (PLAC8), mRNA [NM_001076987]	GGAGTGTTATCCCTTAGTTTTGCTAAATGGTCCAGCGTAGTTTCTCCTTGCTATTAAGTT	1.49026	0.988939	0.0450731
25228	A_73_P206012	PLEKHG4	ENSBTAT00000028741	PREDICTED: Bos taurus pleckstrin homology and RhoGEF domain containing G4 (PLEKHG4), transcript variant X2, mRNA	CACAGTGCTGTCAACCACCCATTCTGATGTCTGTGTCCATTGGACAGATCGGCAGTGACC	0.54241	0.00402348	0.0388613
34210	A_73_P468173	PLP1	NM_174149	ref|Bos taurus proteolipid protein 1 (PLP1), mRNA [NM_174149]	GTACCTCTTTTAGTCATTTTGCTTCATAGCTGGTTCCTGCTAGAAATGGGAAATGCTTAA	0.670944	0.00737264	0.0137592
33213	A_73_P354181	PLPPR1	TC450710	PREDICTED: Bos taurus phospholipid phosphatase related 1 (PLPPR1), mRNA	GAGCTCCCTTGTCTGTATCTATCAGAATGTTTTCTCAACACTTCCATGTTGGTTCTTCTT	0.476123	0.00288005	0.013356
11894	A_73_102058	PLXDC2	NM_001077928	ref|Bos taurus plexin domain containing 2 (PLXDC2), mRNA [NM_001077928]	AGTGCTGGCTTACAGGTGTTAAGACTAAAAATTTGCCTATACCTTTAAGACAAACACACA	0.591041	0.00578787	0.0446362
14841	A_73_118074	PNKD	NM_001114170	ref|Bos taurus paroxysmal nonkinesigenic dyskinesia (PNKD), nuclear gene encoding mitochondrial protein, transcript variant 1, mRNA [NM_001114170]	CTTATGCATCTCTGTATTTTGCGCACTAGCACAGGTGCACTGGCACACAGTAGGCGCTCA	1.35611	0.977814	0.0180224
27509	A_73_P277016	PNPLA4	NM_001080363	ref|Bos taurus patatin-like phospholipase domain containing 4 (PNPLA4), mRNA [NM_001080363]	TTTGCTGAAGAAATCCGAAGGCAGTCTTTTGGGGCACTAACACCTGGCTATGATTTCATG	0.539761	0.00358144	0.000758114
30420	A_73_P092471	POGZ	NM_001163190	ref|Bos taurus pogo transposable element with ZNF domain (POGZ), mRNA [NM_001163190]	AGCGAGACCGAGTCTTTCTATGGCTTTGAAGAAGCTGACCTAGATCTGATGGAGATTTGA	0.657245	0.00807322	0.0218908
34610	A_73_108828	PPARGC1A	NM_177945	ref|Bos taurus peroxisome proliferator-activated receptor gamma, coactivator 1 alpha (PPARGC1A), mRNA [NM_177945]	AAGCAGTGTTTCTACTTGCACTAGCATGGCCTCTGACGTGACCATGAAGTTGTTCTTGAT	0.625137	0.00711371	0.0125131
7273	A_73_P066661	PRKCA	ENSBTAT00000001407	ens|Protein kinase C alpha type (PKC-alpha)(PKC-A)(EC 2.7.11.13) [Source:UniProtKB/Swiss-Prot;Acc:P04409] [ENSBTAT00000001407]	CAGAGAGGCTTTATTGCTGGAAGGATTTTAATATGTTTTGCAAATGCATCATGCAATGAA	0.598864	0.00701403	0.0461748
49761	A_73_101084	PRSS12	NM_001193222	ref|Bos taurus protease, serine, 12 (neurotrypsin, motopsin) (PRSS12), mRNA [NM_001193222]	GTCTTGTCTCAATTTCTCAGCATTCTCCAGAGATTATTGTATATTGATTGTGCAATAAGG	0.479341	0.00264352	0.015613
890	A_73_P459556	PRSS22	XM_587533	gb|PREDICTED: Bos taurus protease, serine, 22-like (PRSS22), mRNA [XM_587533]	GTAACCGCACCCACGTATCTTATTTATTCCTCCAACTTCAATAAATTATTTATTCCCCGT	1.61144	0.994012	0.0425304
32954	A_73_P173507	PRSS23	NM_001080306	ref|Bos taurus protease, serine, 23 (PRSS23), mRNA [NM_001080306]	CAAAAAGCCCCACAAGAGAAAGTTCATGAAGATCGGGGTGAGCCCGCCTGCCAAGCAGCT	0.699235	0.0141216	0.0163165
43343	A_73_105070	PTBP2	BC149775	gb|Bos taurus cDNA clone IMAGE:8209468, containing frame-shift errors. [BC149775]	CATGGCTCAGAATCTACAGGTCAAATTAATTTGAACAGTTCTTGTCAATCTGAATTGTTG	0.642241	0.007344	0.0249714
53658	A_73_P100581	PTCH1	NM_001205879	ref|Bos taurus patched 1 (PTCH1), mRNA [NM_001205879]	ATTTAGTGAAACGGGACAGAATAAAAGAATTCCTTTTGAGGACAGGACCGGGGAGTGCCT	1.40883	0.982957	0.0451517
4120	CUST_1462_PI427023673	PTER	ENSBTAG00000016676	Bos taurus phosphotriesterase related (PTER), mRNA	GCTTCCTTTTGTTTTGTTTTCTTAATCCATCAGCAGCACTCCTTGAGAAAATTTAAACTG	1.45208	0.986547	0.0269452
38252	A_73_P122226	PTMA	NM_001039953	ref|Bos taurus prothymosin, alpha (gene sequence 28) (PTMA), mRNA [NM_001039953]	TCCTACTCTGACTTTACTTGTGGTGTGACCATGTTCATTATAATCTCAAAGGAGAAAAAA	0.760326	0.0276817	0.048562
5813	A_73_111113	PTPRE	TC441326	PREDICTED: Capra hircus protein tyrosine phosphatase, receptor type E (PTPRE), transcript variant X1, mRNA	TGCCAGTGAATGTTGCTGAATTTGTATATGCAAATTGCAAGATCCAAAATATTCTGTTGC	1.54936	0.988111	0.00857765
22844	CUST_679_PI427023673	PYGL	ENSBTAG00000011494	Bos taurus glycogen phosphorylase L (PYGL), mRNA; NM_001075203.2	CAATGGAAAGTAAGTCGTAAAATGTCCTGAGGAAAAAATAGCTTTTTACTGGACTTGAAC	2.29231	0.997158	0.0429617
481	A_73_110333	RAB25	NM_001017936	ref|Bos taurus RAB25, member RAS oncogene family (RAB25), mRNA [NM_001017936]	AGATCTCTATTATCGGTCCCCCTCTTACAGACTACGGCCCTCCAATAAAGCTGTGTTTTA	1.86291	0.994852	0.0261011
11873	A_73_P373691	RAE1	NM_001015585	ref|Bos taurus RAE1 RNA export 1 homolog (S. pombe) (RAE1), mRNA [NM_001015585]	CCTATGATGGTGTTACAGCTCCCTGAAAGGTGTTACTGTGCTGACGTGATATATCCTATG	0.743577	0.0285899	0.046208
14679	A_73_P439926	RAI14	ENSBTAT00000009296	PREDICTED: Bos taurus retinoic acid induced 14 (RAI14), mRNA	TATATCCATAAAGCGGAGCATGAGAAGCTGATGCAAGTGACCAATGTATCCAGAGCCAAG	0.70251	0.0206372	0.0430995
24921	A_73_103377	RALGPS2	TC417110	PREDICTED: Bos taurus Ral GEF with PH domain and SH3 binding motif 2 (RALGPS2), transcript variant X2, mRNA	TAGGTCCTTACCATGAAACCATATTTTGTTAATAGTTGATCAAGAGAGTTTTGTGAGAGC	0.498047	0.00341912	0.0490804
14493	A_73_P067986	RAN	NM_001034705	ref|Bos taurus RAN, member RAS oncogene family (RAN), mRNA [NM_001034705]	ACTACAACTTGGAAACTCCCTTCCTCTGGCTTGCTAGAAAACTGATTGGAGACCCTAACT	0.694804	0.0142951	0.0299638
34511	A_73_P321116	RANBP1	NM_001034586	ref|Bos taurus RAN binding protein 1 (RANBP1), mRNA [NM_001034586]	AGATGAAGAGGAACTTTTTAAAATGCGGGCCAAGCTGTTCCGGTTTGCTTCAGAGAACGA	0.713078	0.0205428	0.0454555
46023	A_73_P111831	RASAL1	ENSBTAT00000029524	PREDICTED: Bos taurus RAS protein activator like 1 (GAP1 like) (RASAL1), transcript variant X2, mRNA	AACCCAGGCATGGAAGTCCTTTGGCTGGGGACCAGCCTTGCACTGAATGAATCTCTCCCT	3.09742	0.997847	0.00231338
19635	A_73_105819	RASL10B	NM_001192556	ref|Bos taurus RAS-like, family 10, member B (RASL10B), mRNA [NM_001192556]	GGCCAAGTACAACTGGCACATCCTGCTGCTCTTCAGCGAGCTGCTCAAGAGCGTGGGCTG	0.714187	0.0234799	0.0399756
24757	A_73_P098086	RASL12	NM_001076933	ref|Bos taurus RAS-like, family 12 (RASL12), mRNA [NM_001076933]	TAGTAAGAGAAAGGTCTCAGAGGCAGGGGCTTTCATAGTTTTCTAGCTCTGTTTACCGCA	0.728763	0.0220478	0.0259827
23341	A_73_P039206	RBM4B	NM_001045928	ref|Bos taurus RNA binding motif protein 4B (RBM4B), mRNA [NM_001045928]	TCCCCTTTGCCGGGATGTTTCCATTGCTTCATGTTTCAGTAAACAAAGGAGTTTGTGACC	0.745511	0.0175672	0.0335903
17029	A_73_P077036	RCBTB2	NM_001192991	ref|Bos taurus regulator of chromosome condensation (RCC1) and BTB (POZ) domain containing protein 2 (RCBTB2), mRNA [NM_001192991]	GGAGACTTTTGGTACAGGGCTCTAAGTGTATGCTATTCTGGCCAAATTTCCATATTCAAC	0.626985	0.00698634	0.0186287
7207	A_73_P047926	RDH16	NM_001075796	ref|Bos taurus retinol dehydrogenase 16 (all-trans) (RDH16), mRNA [NM_001075796]	AGTGGAGATCCTGACAGAGAACACAGAAACCAATTCTTGTTTTGTCTTGAAATCTTAAAT	2.70474	0.996879	0.0384464
40489	A_73_P088461	RELN	NM_001206458	ref|Bos taurus reelin (RELN), mRNA [NM_001206458]	TGTCTTCATGTTGATGTATCTGTGCAAATTGTGATCTGTTGTAATATCAGTTACAGTAGC	0.416504	0.00266748	0.0452845
50010	A_73_P201822	REST	NM_001101880	ref|Bos taurus RE1-silencing transcription factor (REST), mRNA [NM_001101880]	CAGAAACGTACAGCTCAAATAAAGACGTCCCTCAGGAAACCCCCGTAGCAAAGGACAAGT	0.78685	0.0493183	0.0349302
51776	A_73_105147	RGS14	NM_001192731	ref|Bos taurus regulator of G-protein signaling 14 (RGS14), mRNA [NM_001192731]	ACTGTGCAGTTGGCTTGGGGCAGCTGGGTTTGTCCTGGATGTATGGTATTGTTATTATAA	1.5201	0.988281	0.0367313
6101	A_73_P048411	RHOV	NM_001076099	ref|Bos taurus ras homolog gene family, member V (RHOV), mRNA [NM_001076099]	CTCCAAAATCATAGCCTAGAAGACAGGGCAATGTGGAATCTGCAAATAAAGCCTTAAGTT	1.65404	0.991883	0.0205096
761	A_73_P315261	RNF123	NM_001193064	ref|Bos taurus ring finger protein 123 (RNF123), mRNA [NM_001193064]	TGAACAATAAGGATAACAATGGGGGTGAAGCTTCCAGGTACATCTTCCTGACCAAGTTCC	1.68922	0.988746	0.0382344
6461	A_73_P043766	RNF181	NM_001034510	ref|Bos taurus ring finger protein 181 (RNF181), mRNA [NM_001034510]	CTGGTCCTCTGCAACATGTTCCTCTTGCATCTTGAGTTCTCATTAAAGGTTTCTTCATTT	1.56614	0.991862	0.00262198
27444	A_73_P276866	RNF20	NM_001081587	ref|Bos taurus ring finger protein 20 (RNF20), mRNA [NM_001081587]	GAGATGAGGTTAGTCTTCATAAGAAGCTGAGGACGGAAGTAATCCAGCTGGAAGATACAC	0.693209	0.0103091	0.0131493
12924	A_73_P112951	RNFT1	NM_001076407	ref|Bos taurus ring finger protein, transmembrane 1 (RNFT1), mRNA [NM_001076407]	ATTTCGGACCATATAAACAAATGGAAAGATGGAGCCACTTCATCACACCTTCAAATATAT	0.681262	0.014516	0.0417771
18018	A_73_P259376	ROBO2	ENSBTAT00000048830	Bos taurus roundabout, axon guidance receptor, homolog 2 (Drosophila), mRNA (cDNA clone IMAGE:8049638), partial cds	AAATGACCTACCTGGACCACCTTCCAAACCACAGGTCACTGATGTTACTAAGAATAGTGT	0.56959	0.0061323	0.0415173
37383	A_73_P116916	RPL31	DN532698	gb|1360769 MARC 7BOV Bos taurus cDNA 5', mRNA sequence [DN532698]	CGCATGTCTCTTAAGTTAGAGATGTTTCCAGGAACTTTTTCTGGTTTTGTCAGTTTGTTT	0.638137	0.00878658	0.00539156
36570	CUST_1098_PI427023673	RPL35A	ENSBTAG00000014208	PREDICTED: Bos taurus ribosomal protein L35a (RPL35A), transcript variant X2, mRNA	TAACAAAACCAGAGTAATCTGGGGAAAGATAACTCGAGCTCATGGAAACAGTGGCATGGT	0.76472	0.0351238	0.0361141
20691	A_73_P096146	RPL9	NM_001024469	ref|Bos taurus ribosomal protein L9 (RPL9), mRNA [NM_001024469]	AGAAACAACAAGATAGCAGATGGTTCTATGGACTCAGTTGTGATGTTTTAAAGAGACAAT	0.75332	0.0368071	0.0404963
47591	A_73_P512833	RPS27L	EE371316	gb|LB03030.CR_H12 GC_BGC-30 Bos taurus cDNA clone IMAGE:8143550, mRNA sequence [EE371316]	TAACAGGCTTAGAAAACAAAACTAAAGTGTTGTCTGTGCTGAGTATGACTGTTATTCCTA	0.81655	0.04549	0.0480512
20553	CUST_285_PI427023673	RPS28	ENSBTAG00000002468	ribosomal protein S28 [Source:HGNC Symbol;Acc:HGNC:10418]	TCGCCTTGGCCCACCAGGATGATCTGCTGTTAATAAAGTGTTTGTATCGTATGTAAACCT	0.67603	0.0148006	0.0238175
17731	A_73_111985	RPS3	NM_001034047	ref|Bos taurus ribosomal protein S3 (RPS3), mRNA [NM_001034047]	ATAATAGGTCTCCTTGGCCGCTGGATCTGGAATCTGAATGTTGCTCTGCAAAGACCTTTA	0.631148	0.00882341	0.0141752
41999	A_73_P041711	RPS4X	NM_001035445	ref|Bos taurus ribosomal protein S4, X-linked (RPS4X), mRNA [NM_001035445]	AAAGGGTATTCGCCTTACTATTGCTGAGGAGAGAGATAAGAGATTGGCAGCCAAACAGAG	0.772884	0.0412179	0.045696
19141	A_73_P300426	RTN2	NM_001113260	ref|Bos taurus reticulon 2 (RTN2), transcript variant B, mRNA [NM_001113260]	TATGTGGGATTGGTGACCAATCAGTTGAGCCACATCAAAGCTAAGATCCGAGCTAAGATC	0.780838	0.0438541	0.0455512
2747	CUST_2570_PI427023673	RYBP	ENSBTAG00000022689	RING1 and YY1 binding protein [Source:HGNC Symbol;Acc:HGNC:10480]	GACTTAATAGGATCTGGTGCTGTACATATGAATCTCGCAAAGCTCTAACAGAACGGACTT	0.695757	0.0256765	0.0291829
9100	A_73_104422	S100A10	NM_174650	ref|Bos taurus S100 calcium binding protein A10 (S100A10), mRNA [NM_174650]	ATCCAACTCCATTTTGAGAAGCAGAGAAAGAAAAGTCAATTAAAGCCAGATAAGCTTTTG	1.69196	0.994056	0.0200574
11079	A_73_109977	S100A8	NM_001113725	ref|Bos taurus S100 calcium binding protein A8 (S100A8), mRNA [NM_001113725]	AATAGCAGAGCTATTGGGCCTGGGGCTAGGCCCCTGGACTCGTGCCTGCAGAGTAATAAA	2.52496	0.997799	0.0274588
10318	A_73_P103046	SAA1	NM_001075260	ref|Bos taurus serum amyloid A-like (SAA1), mRNA [NM_001075260]	AGAGAGTTCTCTGTCCTCAGAAGGAAGCAGATCTAATAAATGCTTAAGAGATGGAAAAAA	8.39982	0.998334	0.0336615
1549	A_73_P060826	SAA3	NM_181016	ref|Bos taurus serum amyloid A 3 (SAA3), mRNA [NM_181016]	ACTGACCTAGAGAGTTCTCTGTCCTCAGAAGGCAGCAGATCTAATAAATGCTCAAGAGAT	8.40805	0.998308	0.0403085
10477	A_73_115521	SCARA3	XM_614788	gb|PREDICTED: Bos taurus collectin sub-family member 12-like (SCARA3), mRNA [XM_614788]	CAACTGTGTGTAGTTCTCCTGTCTACATATGATATCGTGCCACCTAGTATCACCCACTCA	0.670102	0.0119341	0.0360284
23046	A_73_112953	SCUBE2	ENSBTAT00000027416	PREDICTED: Bos taurus signal peptide, CUB domain and EGF like domain containing 2 (SCUBE2), transcript variant X2, mRNA	ATGGAACCTTCCAAAATGAGGAAGGGCAAATTACATGCGAACCATGTCCAAGACCAGGAA	0.583013	0.00631957	0.0236726
35567	A_73_P361996	SDAD1	NM_001102489	ref|Bos taurus SDA1 domain containing 1 (SDAD1), mRNA [NM_001102489]	TTCCAGGAGCAGAAATTCTGGAAGTTGAAAACGAAGAAGAAAATGCTGAAGGCGATGAAG	0.669807	0.0129814	0.0387323
24559	A_73_P095306	SDC3	NM_001206531	ref|Bos taurus syndecan 3 (SDC3), mRNA [NM_001206531]	TCACATACCAGAAGCCTGACAAGCAAGAGGAGTTCTACGCCTAGCGGAGCCAGAGTGCCT	0.742628	0.0250807	0.0300595
14519	A_73_P043966	SDF2	NM_001034321	ref|Bos taurus stromal cell-derived factor 2 (SDF2), mRNA [NM_001034321]	TCTTCATGAAGCCCAGTGAGCTGCTGAAGGCAGAAGGCCACCACACAGAGCTCTGAGTCT	0.73611	0.0186557	0.0307736
53025	A_73_105444	SEC14L3	NM_001205882	ref|Bos taurus SEC14-like 3 (S. cerevisiae) (SEC14L3), mRNA [NM_001205882]	ACCTCCCCTTGGAACTCACATCTTATGTTTCAAGCAATTAAAGGCACTTCCCTAAAAGCA	2.22924	0.997224	0.0165779
35517	A_73_114162	SELE	NM_174181	ref|Bos taurus selectin E (SELE), mRNA [NM_174181]	TGTCTACAATCACAGCTACTGTACGTAACATGGCTCTGTAAAGTTTGATAATAAACATGT	0.50108	0.0038803	0.0200715
33910	A_73_P088401	SEMA3A	ENSBTAT00000024139	PREDICTED: Bos taurus semaphorin 3A (SEMA3A), transcript variant X4, mRNA	CAAATGGAAGCACTTACAGGAAAATAAGAAAGGCAGAAACAGGAGGACCCACGAATTTGA	0.490205	0.00322648	0.0446263
40781	A_73_P043971	SEPT11	NM_001082447	ref|Bos taurus septin 11 (SEPT11), mRNA [NM_001082447]	ATGTGCCAGTGTTGGGTAGGTGATTTTTCTGCCTCTGGGACTCAATTTATATTTAAAGGT	1.55825	0.990283	0.0260762
2294	A_73_110501	SEPT8	TC403124	PREDICTED: Bos taurus septin 8 (SEPT8), transcript variant X1, mRNA	ACCGAGCGCCTGCGCATTAGCCCGGACAGGATCTACATCAACTTCTGCGACATGAACGCG	1.38927	0.978945	0.0499804
17709	A_73_P064556	SERPINB13	ENSBTAT00000005068	REDICTED: Bos taurus serpin peptidase inhibitor, clade B (ovalbumin), member 13 (SERPINB13), mRNA	TTATAGATAAAATAACTCCTGAGAAGTTAATAGAGTGGACCAGCGCGGGGCGTATGGAAG	1.32761	0.980111	0.0183756
43231	A_73_P108311	SFRP1	NM_174460	ref|Bos taurus secreted frizzled-related protein 1 (SFRP1), mRNA [NM_174460]	ATTTAGAAAGCAAAGCAACTGCGGTTTTTCCCCGAGGGTCCCTAAGATAATTCTCACAGC	0.195839	0.0015554	0.0383215
25872	A_73_P119946	SFTPC	EW684227	Bos taurus surfactant protein C (SFTPC), mRNA	TAGTCCGGCGGGCTCTCCATCAAGACCTCTTTGCTGCCCACATCCATCTTGCTGTAGACA	1.34309	0.984894	0.0302971
5566	A_73_107646	SGK2	NM_001075760	ref|Bos taurus serum/glucocorticoid regulated kinase 2 (SGK2), mRNA [NM_001075760]	TCATCAGAAATGGAAATAGTATTGTCAAAGTACACAACTTGCTATGAGTTGTGAAACACC	2.58105	0.997611	0.0419136
37485	A_73_P133211	SH2D3A	NM_001205669	ref|Bos taurus SH2 domain containing 3A (SH2D3A), mRNA [NM_001205669]	GACTTTTATCAGATCACTTGACCTCTCTGTGCCCAGTTTCAATATAAAAGTGAGACTGTA	1.36785	0.975301	0.0479389
22071	A_73_P279356	SHMT1	NM_001015553	ref|Bos taurus serine hydroxymethyltransferase 1 (soluble) (SHMT1), nuclear gene encoding mitochondrial protein, mRNA [NM_001015553]	TGCTACCTTTTTTACCTGCTGCACAAATCAACATTTAAAGCTTCTGGGACAAGTTATGAA	1.71467	0.993767	0.0396505
36791	A_73_P068161	SIGLEC14	ENSBTAT00000026429	LOC614923 sialic acid-binding Ig-like lectin 14 [ Bos taurus (cattle) ]	TTCAAAGGGTTCTCTTGAGTGGTCAAGTGAATTTCCATCCCCGCATCATATTTGAGGGTT	0.775049	0.0285538	0.0336815
30800	A_73_117756	SIX1	ENSBTAT00000016104	PREDICTED: Bos taurus SIX homeobox 1 (SIX1), mRNA; XM_002691019.6	AAACAAGTGCCTAAATGTCTTAATGCTCTCTATGTGAGGCAGTTAGAAATAGAAGTGACC	2.8346	0.997337	0.00654174
1228	A_73_107945	SLC26A4	CB449724	PREDICTED: Bos taurus solute carrier family 26 (anion exchanger), member 4 (SLC26A4), transcript variant X4, mRNA	TCTATTTGACTTGTTTCCCAAGCACACTCTAGTAATTTTGTCTCTTAATGCATCTTGTGA	1.45812	0.99132	0.0346217
31101	A_73_P041216	SLC2A8	NM_201528	ref|Bos taurus solute carrier family 2 (facilitated glucose transporter), member 8 (SLC2A8), mRNA [NM_201528]	CTGAGACCAAAGGGAAGACTTTGGAGCAAATCACAGCCCATTTTGAGGGGCGATGACAGC	0.79139	0.0305865	0.0415234
24241	A_73_P094756	SLC39A10	NM_001205880	ref|Bos taurus solute carrier family 39 (zinc transporter), member 10 (SLC39A10), mRNA [NM_001205880]	GCTCAGTACTGTTTTCCCTGCATGAAGGGGTCTTTTAAAAATAGAAAACTTGTGATAAAG	0.684054	0.0137884	0.0418049
1737	A_73_P030326	SLC39A6	NM_001144092	ref|Bos taurus solute carrier family 39 (zinc transporter), member 6 (SLC39A6), mRNA [NM_001144092]	ACTGACCTAGAGAGTTCTCTGTCCTCAGAAGGCAGCAGATCTAATAAATGCTCAAGAGAT	0.612728	0.00651895	0.0229236
34029	A_73_115420	SLC47A1	TC404888	PREDICTED: Bos taurus solute carrier family 47 (multidrug and toxin extrusion), member 1 (SLC47A1), transcript variant X2, mRNA	TGTTTCTTCTGCTTACTGTTTTTTAAGCCACAAACCCATATACTGAGCACTTAAAGATTC	0.733283	0.0276396	0.0414412
3713	CUST_2268_PI427023673	SLC6A20	ENSBTAG00000031340	Bos taurus solute carrier family 6 member 20 (SLC6A20), mRNA; NM_001080294.2	GAAAGTCAGGCAGGGAAATATTGTGTTTTTAGCCACCGTCATAATAAAACCCTAAACAGG	1.58637	0.989737	0.033648
8521	A_73_P040976	SLC7A5	NM_174613	ref|Bos taurus solute carrier family 7 (cationic amino acid transporter, y+ system), member 5 (SLC7A5), mRNA [NM_174613]	GCTTTGGGATGGGGAGTTTTGTGTTTTGTTGGGGTAATTTGTTTTTTAAGAATTGGAATT	0.315574	0.00217047	0.0203586
40414	A_73_P034316	SLC9A3R1	NM_001077852	ref|Bos taurus solute carrier family 9 (sodium/hydrogen exchanger), member 3 regulator 1 (SLC9A3R1), mRNA [NM_001077852]	CTGAGCCAGACACAATTGTAAGGAAATTCTTACCCGAAATTCAACTAGTTTCTCCAAACC	1.54371	0.992434	0.0208095
19370	A_73_P091266	SLCO1A2	NM_174654	ref|Bos taurus solute carrier organic anion transporter family, member 1A2 (SLCO1A2), mRNA [NM_174654]	GCTTGTGGCAAAGTTTACAGGGAAGGAAAATGAGGGCAAAGAAATGGATCAAAATGCCAA	0.547195	0.00401183	0.0494557
35790	CUST_440_PI427023673	SLPI	ENSBTAG00000004148	Bos taurus secretory leukocyte peptidase inhibitor (SLPI), mRNA	GTTCTAACACCAATATCTTCTTTGCAGAAGAAGCCAACAAATGTCTGTTGACTTATCAAT	7.89643	0.998364	0.0137859
32018	A_73_P465553	SMKR1	DT836624	PREDICTED: Bos taurus small lysine-rich protein 1 (SMKR1), mRNA	TCTGAGAACGCATTACCATGCCAGCTAAAGGGAAGAAGAAAGGCCGGGGCAAGTCGCGTG	1.38046	0.985586	0.0236068
38717	A_73_113722	SMPD2	NM_001075383	ref|Bos taurus sphingomyelin phosphodiesterase 2, neutral membrane (neutral sphingomyelinase) (SMPD2), mRNA [NM_001075383]	AGTCTCAGCCAGCCCTGCTCCTAGGGCAGCAGGAGAGAGAGAGAGCTGAGGAACAATAAA	1.48982	0.990108	0.0256234
3289	A_73_119529	SNAP23	NM_001075831	ref|Bos taurus synaptosomal-associated protein, 23kDa (SNAP23), mRNA [NM_001075831]	CTTCTGCGACTGCTTTGGGGGGATGGGAAGCAGTAATTTTGTCAGCTTTAATTTCACAAA	1.3509	0.974549	0.0499384
25668	CUST_2858_PI427023673	SNORA14	ENSBTAG00000043324	PREDICTED: Bos taurus small nucleolar RNA SNORA14 (LOC112444800), ncRNA; XR_003033168.1	CTCTTGGTAGCTCCACTGTAAAGGCTTCCAAGATATGAGTGAATGCTATAGAAATCGCGG	0.771949	0.0228569	0.0485115
7422	CUST_2720_PI427023673	SNORA79	ENSBTAG00000043589	PREDICTED: Bos taurus small nucleolar RNA SNORA79 (LOC112448620), ncRNA; XR_003037003.1	TTTAGTCCATCATATATCTAAACTGACTTGTCTTCACTCAGGGCACCATGGGGACAGGTT	0.749431	0.0239868	0.0389729
30802	CUST_2415_PI427023673	SNORA9	ENSBTAG00000042440	PREDICTED: Bos taurus small nucleolar RNA SNORA9 (LOC112446500), ncRNA; XR_003034510.1	TTTGAAACGGTTTGAGGCCTTGCCCTGCTCCATCCAGAGCAAGGTTATAGAAATTTCAGA	0.750414	0.024996	0.0265582
36713	CUST_2670_PI427023673	SNORD12	ENSBTAG00000043036	PREDICTED: Bos taurus small nucleolar SNORD12/SNORD106 (LOC112449405), ncRNA; XR_003037978.1	CCCGACAGATCGACCATGTTGATCTAACTTCTCTAAGCCAGTTTCTGTCTGATATGCCAA	0.569178	0.00403647	0.00588627
6716	A_73_P110731	SNW1	NM_001077834	ref|Bos taurus SNW domain containing 1 (SNW1), mRNA [NM_001077834]	TAAAACTGGCTCCTGCTCAGTATATCCGATACACACCATCTCAACAGGAGTGGCTTTCAA	0.782159	0.0438247	0.0303271
44575	A_73_P495428	SORCS1	NM_001191207	ref|Bos taurus sortilin-related VPS10 domain containing receptor 1 (SORCS1), mRNA [NM_001191207]	GAAGTATTTCCATAGTTGCTGAGAATCAAAGCACAAAAGAAATCCCTACCTATGTAAATG	1.78334	0.995382	0.000334241
27453	A_73_P034946	SOX4	NM_001078128	ref|Bos taurus SRY (sex determining region Y)-box 4 (SOX4), mRNA [NM_001078128]	ATGATCTCGGGAGACTGGCTGGAGTCCAGCATCTCCAACCTGGTCTTCACCTACTGAAGG	0.608824	0.00704072	0.0355389
40371	A_73_P301411	SOX5	NM_001083471	ref|Bos taurus SRY (sex determining region Y)-box 5 (SOX5), mRNA [NM_001083471]	GTCTTAACTAGTTGGGACATCAGCTGACTAATAGACCTCAGCCTCAAAAGGCTTGGAAAG	0.66525	0.0117425	0.0189672
44877	A_73_P030031	SPAG11B	NM_001098154	ref|Bos taurus sperm associated antigen 11B (SPAG11B), mRNA [NM_001098154]	TAGGCAACACAGTGTCATGGACTCTTCACTTGATCTTAGCCAAAAGGCTGAGAAGCAATC	0.67205	0.0115741	0.0173302
194	A_73_114848	SPOCK1	TC394847	PREDICTED: Bos taurus sparc/osteonectin, cwcv and kazal-like domains proteoglycan (testican) 1 (SPOCK1), transcript variant X1, mRNA	ACTCTTTTGGTTAATAGTAAATGCTTAACTGTAGTCCTGAGTAGGTGCATTTGTTTGTCT	0.345602	0.00207388	0.0139671
20303	A_73_117925	SPTSSB	NM_001110774	ref|Bos taurus small subunit of serine palmitoyltransferase B (C1H3orf57), mRNA [NM_001110774]	TTTCAAGGAGAACTAGAGGGAAAGATGTTTGGCATGCCAAATTACCTTGCATGTTTGTTA	1.67061	0.990813	0.0210351
18759	A_73_106286	SQRDL	NM_001040511	ref|Bos taurus sulfide quinone reductase-like (yeast) (SQRDL), nuclear gene encoding mitochondrial protein, mRNA [NM_001040511]	TCCAGGCAGCTCCCATGCAGGCTGCTCAGGACAAGCTTAATTATTTGGAAACATTCAAAT	1.5633	0.989755	0.0300335
27469	A_73_117434	SRGAP2	TC417196	PREDICTED: Bos taurus SLIT-ROBO Rho GTPase activating protein 2 (SRGAP2), transcript variant X2, mRNA	ATGCTTTGTGTGAACCTAAGACTGTCACTCAACAGATGTTGGATTGGGGAAAATCCAAAG	1.47196	0.989001	0.0147956
11199	A_73_120614	SSH2	TC418605	PREDICTED: Bos taurus slingshot protein phosphatase 2 (SSH2), transcript variant X7, mRNA	GCTCCGCTGTTTTTAAATGTGAACTTGTGCGCAAATGTGCAGATTCAATGTTCTTGTTAC	1.47671	0.991017	0.0418917
28146	A_73_P384496	SSRP1	NM_001101041	ref|Bos taurus structure specific recognition protein 1 (SSRP1), mRNA [NM_001101041]	TACCTGTTTTCTCCTATGAAATGCAGTCCTTGGGTTCTGTGCCATCTGAAACAGCTTTCC	0.717269	0.017739	0.0196311
12674	A_73_117990	STAP2	NM_001034246	ref|Bos taurus signal transducing adaptor family member 2 (STAP2), mRNA [NM_001034246]	ACAGGCTTTCTCGCCCACCACAGGGCTGGCAGATGTGACAGCAGAACTGGAAGAGAAACT	1.85348	0.995272	0.00335552
34022	A_73_P137666	STON2	DV918588	PREDICTED: Bos taurus stonin 2 (STON2), transcript variant X6, mRNA	TATGATTTTGTTTCTAGTACTAAGAGTTGGTCAAATGTAATGGCTTAATTCCAGCCAGCC	1.55452	0.989373	0.0425338
24782	A_73_P285451	STT3B	NM_001097570	ref|Bos taurus STT3, subunit of the oligosaccharyltransferase complex, homolog B (S. cerevisiae) (STT3B), mRNA [NM_001097570]	GGTCCAGGTTAACATCCAAAACTCTGGCAACACCTGATTTAAAAAATAAAATTGGCTTAT	0.671961	0.00785554	0.0448567
4314	CUST_2475_PI427023673	STUM	ENSBTAG00000024560	Bos taurus stum, mechanosensory transduction mediator homolog (STUM), mRNA; NM_001083770.1	ATGGTCATCCTCGCCATTTCTCAAGGCTACAAGGAGCAGGGCATCCCACAGCAGCTGTGA	0.650237	0.00977688	0.0294628
17717	CUST_348_PI427023673	SUN2	ENSBTAG00000003693	Bos taurus Sad1 and UNC84 domain containing 2 (SUN2), mRNA; NM_001102319.1	TCACCTTGAGATCAGAGCATCAACAGGACTCAGAAGACCTTTTCAAGAAGATTGTCCAGG	1.38582	0.980295	0.0446297
19589	A_73_103576	SUN5	NM_001046165	ref|Bos taurus Sad1 and UNC84 domain containing 5 (SUN5), mRNA [NM_001046165]	GAAAATAATAAAGATGATCCAAGGAGATTACATTGAGAAGCCGGACTTTGCCCTGAAGTC	1.25525	0.968306	0.0313052
21227	A_73_P051401	SYNPR	NM_001046506	ref|Bos taurus synaptoporin (SYNPR), mRNA [NM_001046506]	CTGGATCCTGTTGGGTAAATCTGTATGTGATATCTCTTTGACCTTAATAAAGTTATTGCA	1.50989	0.993273	0.0387798
15239	A_73_P114631	TAAR8	ENSBTAT00000008724	PREDICTED: Bos taurus trace amine associated receptor 8 (TAAR8), mRNA	TAAAAATTGAAAATACTGGCAGCAAAGCAGAATCACAGAGCTATAAATCCAGAGTGGCCA	1.47122	0.980327	0.0470297
23804	A_73_104098	TAGLN2	NM_001013599	ref|Bos taurus transgelin 2 (TAGLN2), mRNA [NM_001013599]	GTAGGCTGCTCACCATGGGCTGGGGCTTGAAGAATCTGAGTTTGCTGATTTAAATAAAGA	1.39208	0.979523	0.0372913
21152	A_73_108910	TALDO1	NM_001035283	ref|Bos taurus transaldolase 1 (TALDO1), mRNA [NM_001035283]	ACGAATCATAGATTTCTGATTTATGTAAAAATCTGCTCAGCGCATTAAAGCCCTCACTTT	1.48726	0.98889	0.0107127
28698	A_73_P100626	TAP	ENSBTAT00000018930	ens|Tracheal antimicrobial peptide Precursor (TAP) [Source:UniProtKB/Swiss-Prot;Acc:P25068] [ENSBTAT00000018930]	AAACAGATTGGCACCTGTGTTGGCCGGGCCGAAAAATGCTGTAGAAAGAAGTAAAAGAAG	4.35696	0.997926	0.0296421
17744	A_73_P037456	TBC1D10C	NM_001102060	ref|Bos taurus TBC1 domain family, member 10C (TBC1D10C), mRNA [NM_001102060]	AAAGGGCACAGGCTGGGCCATGGGGACCCCAAAAGGCTCCTGAGGGGCCTGGAATAAAGT	1.36348	0.968907	0.0448976
33318	A_73_P118706	TBCA	CK772058	gb|960492 MARC 1BOV Bos taurus cDNA 3', mRNA sequence [CK772058]	CCTCTCTCAAATCGTTTTAGGTTTGAAATTGGGAAGAATTCCAAATCCTTTGTAAAACAG	0.727023	0.0198491	0.0490129
53665	A_73_P269606	TC407778	TC407778	PREDICTED: Bos indicus hemicentin 1 (HMCN1), mRNA	CAGACTCTGGAAGCAATTGCCGAGATGTATTGAATTTTTATGAAGTGTACATATATTACC	1.51387	0.986395	0.0406698
17362	A_73_118230	TC407784	TC407784	PREDICTED: Bos taurus ring finger protein 152 (RNF152), mRNA	ATTTTTGTACGCCGATCTGGTGTCTTGTCCTTTGTATATGCGGTAATGTTGATTTTATGA	1.56936	0.990364	0.039722
12580	A_73_119583	TC426521	TC426521	Unknown	GGAAATGCCTCAGGATATTCCCTCTTTTCACTGGGGATTCACTTGCCTGTTTGCACATTA	0.694745	0.0167527	0.0456337
14416	A_73_115026	TC447578	TC447578	tc|Rep: Proteolipid protein 2 - Bos taurus (Bovine), partial (14%) [TC447578]	CCATGGGGAGTGTGGGCTCAATGTTGCCCCCTTTTCTAGTTTTTCAAACTGCTGAAAATT	1.57692	0.992343	0.0482114
6339	A_73_P085406	TCERG1	ENSBTAT00000061039	PREDICTED: Bos taurus transcription elongation regulator 1 (TCERG1), mRNA	TATCTAGTACTAGACTGTGTGCCAGAGGAGAGGCGTAAACTGATTGTGGCATATGTGGAT	0.79709	0.0353327	0.0498408
35726	A_73_112515	TCF21	NM_001014899	ref|Bos taurus transcription factor 21 (TCF21), mRNA [NM_001014899]	TAAAATGTAGATCATAGAATAGCTGACTTTGACAGTCACATTTATAAAGTAATTCACTTA	2.86897	0.997708	0.0138778
20325	A_73_110103	TFF3	NM_001114509	ref|Bos taurus trefoil factor 3 (intestinal) (TFF3), mRNA [NM_001114509]	TTCAAATGTAAGTTCCCCCCAAAAGGTTATTCATGACTTTCATGGTAAAGAGAGAGCCAA	4.68385	0.998235	0.00516007
24477	A_73_106579	TGFBR1	TC422941	PREDICTED: Bos taurus transforming growth factor beta receptor I (TGFBR1), transcript variant X1, mRNA	GAGGTAGAAGAATAATGCTTATGTCAAGTCCTAACACTACAGTAGAAACATGGAAGCAAT	0.72658	0.0192405	0.0394063
24780	A_73_P073711	THNSL1	ENSBTAT00000012015	PREDICTED: Bos taurus threonine synthase like 1 (THNSL1), mRNA	ATGGAGCACCAGGTCTGTGTAGCTGATGTGAATGTCCTGAAGAATTATGTGGAAAAACTT	0.751654	0.0317741	0.0231023
14790	CUST_1725_PI427023673	THOC1	ENSBTAG00000019215	Bos taurus THO complex 1 (THOC1), mRNA; NM_001205480.2	GACCTCGCAGAAAGTCTAACTAATGACAATGAGACAAACAGTTAGCTTTGTTCTTTTATT	0.786338	0.0564422	0.0338141
6822	A_73_P095776	TIAM1	ENSBTAT00000023716	PREDICTED: Bos taurus T cell lymphoma invasion and metastasis 1 (TIAM1), mRNA	TTTGATCTTGCTCAGTATGAAGAGCAGGATGACATCAAGGAGACAGACATCCTCAGTGAC	0.772822	0.0211675	0.0414077
16220	A_73_110685	TKDP1	NM_205776	ref|Bos taurus trophoblast Kunitz domain protein 1 (TKDP1), mRNA [NM_205776]	GGTTTAAAAAAGCCCCTTTTCCACACAACGATGTTGCAATTTTCATTTCTGTAGCTTCAA	1.32366	0.969354	0.0437598
37441	A_73_110504	TLE6	TC455836	PREDICTED: Bos taurus transducin like enhancer of split 6 (TLE6), transcript variant X13, mRNA	CAGCAACCACCTGATCGTCACAGGGTGCAGGGACCACGCCTCGGTGTACCAGCTCACATA	0.49835	0.00388491	0.0295203
9964	A_73_P066441	TMC8	ENSBTAT00000025384	gb|PREDICTED: Bos taurus transmembrane channel-like 8 (TMC8), mRNA [XM_591560]	GGGGCAGCAGGAAGAAAATATGGGAACTTGTATTTATATTTTTATCTCTGTCCTTTAAAG	1.60632	0.994943	0.0439228
34176	A_73_P251631	TMED9	NM_001034812	ref|Bos taurus transmembrane emp24 protein transport domain containing 9 (TMED9), mRNA [NM_001034812]	TTCCTTGTGTCTTCCTTTGCTAACTTGGAACTTTGACCAGGTTGGGGCATAGCTGTGATT	0.731946	0.0154663	0.0198959
32971	A_73_P086911	TMEFF1	NM_001205476	ref|Bos taurus transmembrane protein with EGF-like and two follistatin-like domains 1 (TMEFF1), mRNA [NM_001205476]	CGACGACAGAAGCAAAACCTAGGTCATTTTACTTCAGATACGTCATCCAGAATGGTTTGA	0.718556	0.0224622	0.040465
27334	A_73_114429	TMEM130	NM_001083369	ref|Bos taurus transmembrane protein 130 (TMEM130), mRNA [NM_001083369]	CACCGTTGTACAGCTCATACTCATAAATACTGCCGTTATTGCTGAATAAAGCTTGTGTGC	0.181334	0.00156635	0.0400525
15612	A_73_117155	TMEM132B	CO877562	PREDICTED: Bos taurus transmembrane protein 132B (TMEM132B), transcript variant X1, mRNA	TTGGGACTGTGGATGGAATCTGCCAGAACATTTTGATCTTACTCTTCCTTACTTTTGGAT	0.765247	0.0314674	0.0300071
49558	A_73_100899	TMEM213	NM_001040513	ref|Bos taurus transmembrane protein 213 (TMEM213), mRNA [NM_001040513]	CCCAAGAATGTCAATCACCAAGTTGTGGGTAATAGCAGGAGGGGAGAGCGCTGATGTGGT	1.93381	0.996324	0.0039342
48385	A_73_118928	TMEM37	NM_001034744	ref|Bos taurus transmembrane protein 37 (TMEM37), mRNA [NM_001034744]	CCTCCATGCCACCAGCTGCACCAGTTTATCCACAGCCATGTTATATAGGATGTTGATTTT	0.510781	0.00365536	0.0171209
150	A_73_P338001	TNFRSF11B	NM_001098056	ref|Bos taurus tumor necrosis factor receptor superfamily, member 11b (TNFRSF11B), mRNA [NM_001098056]	TTCTCAGGCGCTTGAGGAGGGAACAATGATTTCTTTCTCATCACCAAGGACTAGCTTTGA	0.479539	0.00261106	0.0411022
17190	A_73_114732	TNFRSF13C	NM_001193192	ref|Bos taurus tumor necrosis factor receptor superfamily, member 13C (TNFRSF13C), mRNA [NM_001193192]	CTGAGAGACTGATCTGATCTGAGTGAGCACAAATACACAAAATAAACTCATACCATCTGT	1.56011	0.99195	0.0373777
30775	CUST_2580_PI427023673	TNFRSF1B	ENSBTAG00000024928	TNF receptor superfamily member 1B [Source:HGNC Symbol;Acc:HGNC:11917]	GCTGTGACCTGGTTAAGATGCCAAACCTCTAACCGGAAATCTTCCAGTTTAAACTTGTGG	1.54782	0.98774	0.047883
45415	A_73_P038171	TNK2	NM_173885	ref|Bos taurus tyrosine kinase, non-receptor, 2 (TNK2), mRNA [NM_173885]	ACAATGTGCTGGAGATGTTCGACTGGAACCTGGAACAGGCCGGCTGCCACCTGCTGGGCT	0.749721	0.0291177	0.0307055
18957	A_73_P030026	TNS4	NM_001038155	ref|Bos taurus tensin 4 (TNS4), mRNA [NM_001038155]	CATGTATCTGTGGATGCCTTGTAGCTCCCCTCATGGAAAATAAAGTGTCTGTCTTTGCAC	1.54893	0.99146	0.0262387
35857	A_73_114983	TPPP	NM_173976	ref|Bos taurus tubulin polymerization promoting protein (TPPP), mRNA [NM_173976]	CATACCTCCTCGTGTGCTCCCTGTTGTTAACATTGTGTCCGGTTGGTAAAGTGACAAATA	2.04543	0.994247	0.0490968
39077	A_73_P305666	TPR	NM_001205623	ref|Bos taurus translocated promoter region (to activated MET oncogene) (TPR), mRNA [NM_001205623]	CAAGATCAAATGCATCTTTGACTAACAACCAGAACTTAATCCAGAGTCTAAAGGAAGATT	0.779954	0.0356821	0.0290149
29716	A_73_P289011	TRA2A	NM_001046380	ref|Bos taurus transformer 2 alpha homolog (Drosophila) (TRA2A), mRNA [NM_001046380]	TATTCTATCACTAAGAGAGCACACACACCAACACCAGGCATATACATGGGCAGACCAACT	0.729559	0.0157859	0.0363747
53964	CUST_1741_PI427023673	TRAPPC13	ENSBTAG00000016900	trafficking protein particle complex 13 [Source:HGNC Symbol;Acc:HGNC:25828]	CCAGTGTTACACTTTTCATTGAGTTGCCCAGAATTTTCTGTATTTTTGTCACCTTTGTAA	1.39343	0.985933	0.0189219
20043	A_73_118489	TRIML2	ENSBTAT00000011391	PREDICTED: Bos taurus tripartite motif family like 2 (TRIML2), transcript variant X2, mRNA	TCAGTATCTCCAGTGGAGGTGTGAATTCAGACTCTTTGAGTATCTGCCTCCCTCATGTTT	1.72517	0.992754	0.0371435
49204	CUST_1561_PI427023673	TSPEAR	ENSBTAG00000018607	thrombospondin type laminin G domain and EAR repeats [Source:HGNC Symbol;Acc:HGNC:1268]	CCTCACATATTTGTACCAGCTATTTATTGTGTTCTGTCTATTTATGATGCTTCCTACAGA	0.561183	0.00604724	0.0418828
34472	A_73_P410221	TTC21B	NM_001102108	ref|Bos taurus tetratricopeptide repeat domain 21B (TTC21B), mRNA [NM_001102108]	TTTACAAGATGCCATCCATGAATTTTCTGGGACGTCTGAAGAGTTGCGTGTCACTATCGC	0.641555	0.00988406	0.0204869
16804	A_73_P333361	TTC3	NM_001109767	ref|Bos taurus tetratricopeptide repeat domain 3 (TTC3), mRNA [NM_001109767]	GAAAGGTTTCTCAAGAATCTGAAGCTAATGAGCAGTGATTCGGCAGCGTATTCTGACATG	0.732209	0.0284468	0.047099
43116	A_73_P203637	TTC38	NM_001105259	ref|Bos taurus tetratricopeptide repeat domain 38 (TTC38), mRNA [NM_001105259]	TGTCTTCAACCAGTTACTGATTCACGCGGCCTTGAACTGCTCGTCCGGCCTCCACAAGCA	0.708707	0.0108306	0.0282147
9399	A_73_112267	TTPA	NM_001206676	ref|Bos taurus tocopherol (alpha) transfer protein (TTPA), mRNA [NM_001206676]	GGTTTCCTGATTAAAAATTCATGACTGAGATCCTATCTGGTTATATGAATGAAAGGAAGG	1.63405	0.991428	0.0444793
47853	A_73_P116636	UBE2E2	NM_001191190	ref|Bos taurus ubiquitin-conjugating enzyme E2E 2 (UBE2E2), mRNA [NM_001191190]	GGGTGTTCTTTCTTGACATAACCTTTTCACCTGACTATCCGTTTAAACCCCCCAAGGTCA	0.648383	0.0118099	0.0301378
16323	A_73_P041491	UNC50	NM_001014921	ref|Bos taurus unc-50 homolog (C. elegans) (UNC50), mRNA [NM_001014921]	GCAGCAGTATTGGTGAGGTGGTGATTTCTTGTGAAACCTGTAAATAAACTATCATTGTAG	0.680305	0.0116264	0.0201905
36319	A_73_P036686	UPB1	NM_001101050	ref|Bos taurus ureidopropionase, beta (UPB1), mRNA [NM_001101050]	TGAGGTGGTTAAACTTTGTTGGGTGAGTTATAGAAATTCAATTAAAAGATGATCCCAGGC	1.4228	0.981531	0.0203557
8610	A_73_P058691	UPK3BL	NM_001168011	ref|Bos taurus uroplakin 3B-like (UPK3BL), mRNA [NM_001168011]	TCCTTAGCCCAAAGCTTGGGCCTGCCCCTTTGAGGAATAAATGTCCCCAACAGCTCCCTG	2.9629	0.997522	0.00823217
42262	CUST_2876_PI427023673	USP30	ENSBTAG00000019845	Bos taurus ubiquitin specific peptidase 30 (USP30), mRNA; NM_001191361.3	GAAAACAGACCTCATCTGGGAGTCACACGGACAATTTTTGCAAAGCTCTGATTGTTGCAG	0.75866	0.0323686	0.0184954
43063	A_73_P087181	USP53	ENSBTAT00000013666	Bos taurus cDNA clone IMAGE:7985649, partial cds	CTGTAGTACTAACAAACTAGAAACCGACTGTTTGTTTTTGTTGACACAACACTCCAAATA	1.42281	0.984605	0.047494
1505	A_73_P106956	WC-7	ENSBTAT00000042901	Bos taurus WC1 isolate CH149 (WC-7), mRNA	ATCTAGCTATGAAGATGCTCTTGCTGAAGCTGTGTATGAGGAGCTCGATTACCTTCTGAC	1.43811	0.987737	0.0252362
50629	A_73_P080256	WDHD1	NM_001192766	ref|Bos taurus WD repeat and HMG-box DNA binding protein 1 (WDHD1), mRNA [NM_001192766]	AAACCTTTAGATCTTTCTACGAATCAGAAACTGTCAGCTTTTGCTTTTAAGCAGGAATAG	0.738328	0.0259464	0.0293949
20329	A_73_106476	WDR17	XM_001789371	gb|PREDICTED: Bos taurus WD repeat domain 17 (WDR17), mRNA [XM_001789371]	CTTAAGACCTTTCATGGCGTTAGTATTACCTTAACCTCTGTTGTCCAAAGCCAAAGGTCT	1.47595	0.98529	0.0349236
27987	A_73_P040736	WFDC2	NM_001076490	ref|Bos taurus WAP four-disulfide core domain 2 (WFDC2), mRNA [NM_001076490]	TTGAAATGCTGCGTCAATGGTTGCGGGAGGGTGTCCTGTGTCACCCCTGTCTTCTGAGCT	4.45832	0.998203	0.0221231
47963	A_73_106356	WNK3	ENSBTAT00000021876	Bos taurus WNK lysine deficient protein kinase 3 (WNK3), mRNA; NM_001256587.1	TAGTGGCAGGTTCCTGAAATTTGACATAGAACTGGGAAGAGGAGCATTTAAAACAGTATA	0.745098	0.029471	0.0494767
46997	A_73_108402	WNT2B	NM_001099363	ref|Bos taurus wingless-type MMTV integration site family, member 2B (WNT2B), mRNA [NM_001099363]	CTGGGATTGCTAGATATGAGTTAGCATAGTGGACAAGGTTCCATTCTCATGCTCATATTG	2.2781	0.99742	0.000477427
50859	A_73_P257901	XRN2	NM_001192472	ref|Bos taurus 5'-3' exoribonuclease 2 (XRN2), mRNA [NM_001192472]	AAACCGAACAAACCCAAACCCTGTGGTCTTTGTAATCAATTTGGACATGATGTCAAGGAC	0.736657	0.0245782	0.0171267
27645	A_73_P034826	ZBBX	NM_001079633	PREDICTED: Bos taurus zinc finger, B-box domain containing (ZBBX), mRNA	AGACACAGAACTTACATGCAGCAAAATCAGATTCATTGGAAGAATGTGAAGTACAAACTA	1.55349	0.992807	0.0144994
4800	A_73_P077006	ZC3H13	ENSBTAT00000009295	PREDICTED: Bos taurus zinc finger CCCH-type containing 13 (ZC3H13), transcript variant X5, mRNA	AAGACTGAAGATGATAAACTTTCACAGTCCGGTATCCAACAGGAACTCTGTGTGTCTTAA	0.717148	0.0132212	0.0242528
7467	A_73_104248	ZC3HC1	NM_001034591	ref|Bos taurus zinc finger, C3HC-type containing 1 (ZC3HC1), mRNA [NM_001034591]	GGTTTCATGTCTGAGGTCGGGGCAGTGTTTTGAAGACTCTTATGTCCCAGGAATATGTAA	0.7621	0.0274917	0.0218691
26263	A_73_P205642	ZCCHC17	NM_001034652	ref|Bos taurus zinc finger, CCHC domain containing 17 (ZCCHC17), mRNA [NM_001034652]	AATGATAGGATAAAAGTATCCCTCTCCGTGAAGGTTGTCAACCAAGGGACTGGAAAGGAC	0.768542	0.0436369	0.0262179
25121	A_73_P067146	ZDHHC1	ENSBTAT00000013295	PREDICTED: Bos indicus zinc finger DHHC-type containing 1 (ZDHHC1), transcript variant X5, mRNA	TTCCACATTTATCTCATGTGGCACAAGCTCACCACCTATGAGTACATTGTGCAGCATCGT	0.760432	0.029688	0.0341217
4947	A_73_P299971	ZNF292	NM_001192850	ref|Bos taurus zinc finger protein 292 (ZNF292), mRNA [NM_001192850]	GGATTCTGACACAAGTGTATCAGAGAGCAATGATAATGCAAGAACAGCTGTAGTTCCACA	0.784093	0.0439848	0.0373627
28813	A_73_P290351	ZNF3	NM_001046614	ref|Bos taurus zinc finger protein 3 (ZNF3), mRNA [NM_001046614]	TGTTATTTCATTGGGCAGGTGTAGGGGAACACTGAGAGAGGTTTTCTGTAGTGACCATGT	0.720618	0.0166023	0.031306
12513	A_73_112450	ZNF32	NM_001046119	ref|Bos taurus zinc finger protein 32 (ZNF32), mRNA [NM_001046119]	GGTAGAGCAAACTGAGTTTTCTTTTTTCCCCCCAAATGAGTATGAAAAATAAATGTCTTG	0.694598	0.0124418	0.0265371
17529	A_73_106394	ZNF385B	NM_001083502	ref|Bos taurus zinc finger protein 385B (ZNF385B), mRNA [NM_001083502]	CAGGGGCAAGAGGTATAAGACAGCAAAATAAAATGAACTCTTTTAGAGCATCTATATCTG	1.62565	0.990454	0.017431
40017	A_73_P417911	ZNF507	NM_001206198	ref|Bos taurus zinc finger protein 507 (ZNF507), mRNA [NM_001206198]	TGCCAGTGACCAAAATTACAACTACGAACAAGTGAACAAGGCTATTAATGATGCAATTTC	0.739256	0.0147702	0.0345446
42499	A_73_115024	ZNF711	NM_001205925	ref|Bos taurus zinc finger protein 711 (ZNF711), mRNA [NM_001205925]	TTGTGTGTCCTGTGGTTGTAAATGATGTACACGCTGTAAGATAAGATTGTCACTGTTAAT	0.516435	0.00322446	0.0254888
47917	A_73_P084576	ZNF77	ENSBTAT00000017099	PREDICTED: Bos taurus zinc finger protein 77 (ZNF77), mRNA	GGGAAAGCCTTCAGGTATCCAAGATCTTTGCAAGGACACATGATAACTCACAGTGAAGAG	0.550862	0.00474874	0.020575
45552	A_73_P051476	ZSCAN2	NM_001101190	ref|Bos taurus zinc finger and SCAN domain containing 2 (ZSCAN2), mRNA [NM_001101190]	AACGCACCTTGGTTTTTACAGGATGGCTGCTCCAAATCACCTAATAAAGTCGAGTCCCAT	0.647946	0.00917564	0.0468746
17114	CUST_2842_PI427023673	ZZEF1	ENSBTAG00000016316	Bos taurus zinc finger ZZ-type and EF-hand domain containing 1 (ZZEF1), mRNA; NM_001206129.3	ATCTTGAAGCAGATGCTGTCAGAAGAAAGAGTTGTGCCATACCTCCCGTTGGCCAAAATT	1.38442	0.985497	0.0402833
