# Supplementary material for: Subclinical endometritis in dairy cattle is associated with distinct mRNA expression patterns in blood and endometrium
Source: PLoS One. 2019 Aug 2;14(8):e0220244. doi: 10.1371/journal.pone.0220244 (PMC6677313; doi:10.1371/journal.pone.0220244)
Supplement: S4 Table — (XLSX) [file pone.0220244.s010.xlsx]

## Sheet: Feuil1
Index	ProbeName	GeneName	SystematicName	Description	Sequence	FC2	f.value	TREAT
43092	A_73_109082	CLEC6A	NM_001034479	ref|Bos taurus C-type lectin domain family 6, member A (CLEC6A), mRNA [NM_001034479]	AGGTCATGGGGATATTCCGATGCCTTTCTCTCTTCAGTTCGTCCTCTTCTATTAACCTCT	2.55576	0.998941	0.0201476
45945	A_73_P160035	LOC101902555	ENSBTAT00000047979	PREDICTED: Bos taurus multidrug resistance-associated protein 4-like (LOC101902555), transcript variant X6, mRNA	TCTTAGATTGTCAGAAACCGAAGGTGGCATTCGGATTGATGGGATCTGGACAAACAACAT	2.54049	0.999135	0.0474363
38492	A_73_P148316	KPNB1	TC464952	PREDICTED: Bison bison bison karyopherin (importin) beta 1 (KPNB1), mRNA	GATCTTTTCATCAAGGCGCCTTTCCTAATAATATGGTTCAACTGTGAATGTAGAAGTGGG	2.48914	0.999137	0.0233355
49500	A_73_P107676	CXCL8	NM_173925	ref|Bos taurus interleukin 8 (IL8), mRNA [NM_173925]	TGTTAAGCTTACCAATGGAAACGAGGTCTGCTTAAACCCCAAGGAAAAGTGGGTGCAGAA	2.30845	0.999048	0.02408
45751	A_73_105393	TMEM232	TC458959	PREDICTED: Bos taurus transmembrane protein 232 (TMEM232), transcript variant X9, mRNA	TGGGATGAACATCAATCAGTACTCCTATAATGACTGTAACACTAATAAAACATGTAAGGC	2.24909	0.998772	0.0389668
4538	A_73_P101151	C3	NM_001040469	ref|Bos taurus complement component 3 (C3), mRNA [NM_001040469]	CCCTGGAGCTGGCCAGGAGTGACCTGGATGATGACATAATTCCAGAGGAGGACATCATTT	2.1282	0.99885	0.016181
471	A_73_111285	CPA3	NM_001192660	ref|Bos taurus carboxypeptidase A3 (mast cell) (CPA3), mRNA [NM_001192660]	TTAATGTCTCATGGAACTCTTTCCCTAACACCAATGATCCGTGTCAGGAGATCTATCGGG	2.12523	0.997848	0.0228133
18183	A_73_100847	LOC507756	ENSBTAT00000039859	ecto-ADP-ribosyltransferase 5-like	ATGAAGTCTTCGTGGTGACGAGTTTCTTTAAGGATGGAAACAACAGCCTGGTGACTCTCT	2.10282	0.99905	0.000652621
25204	A_73_P486633	LOC528502	TC398728	olfactory receptor 8K3	AAGGAAGTAAAAGGTGCTCTGCATAGAATGTGGGAAAATCTCTGCAAAATTCCTATATAA	2.0777	0.997186	0.0382554
22473	A_73_P034856	ART5	NM_001076515	ref|Bos taurus ADP-ribosyltransferase 5 (ART5), mRNA [NM_001076515]	TGGGAACAAGCAAGGATAGTGCTTTGATGGCTACTCCATTAAACAGTGCTGCAGTATGGT	2.06137	0.998936	0.0096382
24263	A_73_112892	ARHGAP32	NM_001192087	ref|Bos taurus Rho GTPase activating protein 32 (ARHGAP32), mRNA [NM_001192087]	AGAGCTGGCCTTGCAGCCTCCTGAAACGCAGGTCCATGCAGAATGAGCCCCGGGAGCAAT	2.02194	0.998714	0.00752231
25106	A_73_P096596	PRKCI	NM_001205955	ref|Bos taurus protein kinase C, iota (PRKCI), mRNA [NM_001205955]	TCTGAATTTGAAGGTTTTGAGTACATTAATCCTCTCTTGATGTCTGCAGAAGAATGTGTC	1.97989	0.998751	0.0021071
3864	A_73_P074653	TKDP5	ENSBTAT00000053389	ens|Trophoblast Kunitz domain protein 5 Fragment [Source:UniProtKB/TrEMBL;Acc:Q9N0X4] [ENSBTAT00000053389]	TTCATGAGATACAGTCTTCCCTTTATCCTGAGCACTTAACACAGTTTCTGGCACCAAGGA	1.97918	0.998428	0.045704
14499	CUST_1742_PI427023673	TRAPPC13	ENSBTAG00000016900	PREDICTED: Bos taurus trafficking protein particle complex 13 (TRAPPC13), transcript variant X3, mRNA	GACATCGCACAAGTCTGTGTGGTATCTTCGGCCATTAAAGTGGAAAGTTGAAGAAAATGT	1.96676	0.998841	0.00393038
36001	A_73_P032486	SEPHS2	NM_001114732	ref|Bos taurus selenophosphate synthetase 2 (SEPHS2), mRNA [NM_001114732]	ATCTTCAAAGTATGGAGAGGGTCATCAAGCCTGGATCGTCGGTATTGTGGAAAAGGGAAA	1.91143	0.996492	0.0240052
5532	A_73_P095761	EVA1C	NM_001199027	PREDICTED: Bos taurus eva-1 homolog C (C. elegans) (EVA1C), transcript variant X3, mRNA	TTCTGAGGAAAGATGGTGTGATTGTCAGCCACTCGTTGGCAGCATTTGCTTACATTAGAG	1.90186	0.998037	0.0266571
6196	A_73_117651	MRAS	NM_001098118	ref|Bos taurus muscle RAS oncogene homolog (MRAS), mRNA [NM_001098118]	TCCTGCGCGTCAAGGACAGGGAGTCATTCCCGATGATCCTCATGGTCAAAAGGTCGATCT	1.90174	0.998994	0.0255617
382	A_73_118327	VCAM1	NM_001101158	ref|Bos taurus vascular cell adhesion molecule 1 (VCAM1), mRNA [NM_001101158]	GGAGACGTTTTTTGATGTTGTTTGTTCATCAGACTCTTGTGTCATTTTCCCAAGTGGTCT	1.8829	0.99831	0.0370161
45936	A_73_109432	CYB5R2	ENSBTAT00000021485	gb|PREDICTED: Bos taurus cytochrome b5 reductase 2-like (LOC536960), mRNA [XM_617111]	AGCTGCGCACCCTAACCTGAAGAAACTGGGTTATACCAAGGACATGATTTTCACCTACTA	1.88051	0.997936	0.00571814
50266	A_73_P269961	PARD3	ENSBTAT00000019972	PREDICTED: Bos taurus par-3 family cell polarity regulator (PARD3), transcript variant X18, mRNA	TCCCACTCTCTGGAGAGACAGATGAATGGAAACCAAGACAGAGGCGAGAAGCCCGATCGG	1.86344	0.998346	0.0436753
11216	A_73_100009	TC411502	TC411502	Bos taurus isolate L1 Dominette 01449 registration number 42190680 breed Hereford chromosome 22, ARS-UCD1.2	TGTGCAAGTTTCCTCCTGTAAGGACACCTCTAATCGGAAAGGCCATTTCCTTGGTATCAT	1.82556	0.998646	0.00841071
7843	CUST_1912_PI427023673	PF4	ENSBTAG00000011961	Bos taurus platelet factor 4 (PF4), mRNA	CAGCAGAATCCTCTGTATAAGAAAATAATCAAGAGGCTTTTGAAGAGTTAGTTGCCTAAA	1.82531	0.998287	0.0088361
42099	A_73_P327001	MYOF	NM_001193212	ref|Bos taurus myoferlin (MYOF), mRNA [NM_001193212]	ACAGAAGGAAAAGCTAATGTCACGGTTCTCGATACTCAGATCCGAAAGTTGCGATCCAGA	1.8197	0.998337	0.0306992
24769	A_73_P112406	MTUS1	NM_001075692	ref|Bos taurus microtubule associated tumor suppressor 1 (MTUS1), nuclear gene encoding mitochondrial protein, mRNA [NM_001075692]	CCGTGCTAGAGATCAAGAATGAGAAGCTGCACCAACAGGATGTGAAGTTAATGAAGATGG	1.81456	0.998268	0.0116351
20631	A_73_P052226	OAS1	NM_001029846	ref|Bos taurus 2',5'-oligoadenylate synthetase 1, 40/46kDa (OAS1), mRNA [NM_001029846]	TGATTCTCATTGTAATACATTGAGACATGGCCACTCACTCAGAGTCCCCTGATGAGTGAG	1.80384	0.995763	0.0453005
35020	A_73_104160	TC466838	TC466838	Bos mutus isolate yakQH1 chromosome 22	ACAAGGAATAATAAGGGAACTTTGATTCTTAAAGGAAGTCGATAGCTGCATTGTTTGCTT	1.79848	0.998132	0.00492696
26067	A_73_115081	ZNF205	NM_001034473	ref|Bos taurus zinc finger protein 205 (ZNF205), mRNA [NM_001034473]	TGGCAACACAGGAGGAGCTCAGATGAGGACCAGGCATGCTCGCCGCAAATTAAAGGCCTT	1.76817	0.997822	0.0371295
6999	A_73_P042756	C1R	NM_001034407	ref|Bos taurus complement component 1, r subcomponent (C1R), mRNA [NM_001034407]	AGTGGAAGACTGACCTCAGGATTGCCTAGGTCAGAATCCAGAGAGCAGTGTATTAAAAAA	1.76292	0.99749	0.0373982
43505	A_73_118840	CFB	NM_001040526	ref|Bos taurus complement factor B (CFB), mRNA [NM_001040526]	AGGATCTGGGTTTTCTATAAGGGGTTTCCTGCTGGAAAGGGGCATGAGACCAAATTAAAA	1.74261	0.997822	0.0419176
23705	A_73_104831	ZNF420	NM_001102552	ref|Bos taurus zinc finger protein 420 (ZNF420), mRNA [NM_001102552]	GAATTCATATCAGTGAGAAATCTTTTGCATATAAGGAATGTGGGATAGACTTCAGTCATG	1.73581	0.996917	0.0327147
22963	A_73_P226857	KIF20B	NM_001105258	ref|Bos taurus kinesin family member 20B (KIF20B), mRNA [NM_001105258]	GGAACAAAAGGTTTCCATACGCCCATCATCTAAGAAAACTTATTCTTTACGGAGTCATGC	1.73388	0.998165	0.0381902
3191	A_73_P049566	DMTF1	NM_001078044	PREDICTED: Bos taurus cyclin D binding myb-like transcription factor 1 (DMTF1), transcript variant X7, mRNA	CTACAATTTCACGTTAACAAAACACAGACGGTGAAAAGACAACTTTGATTGTGTAGATCT	1.68929	0.995132	0.0464358
44331	A_73_P371341	CALD1	NM_174258	ref|Bos taurus caldesmon 1 (CALD1), mRNA [NM_174258]	CCTAAATCTGAACCCACACCATGGATGATTTTGAACGTCGCAGAGAACTCAGAAGGCAAA	1.68924	0.997039	0.0299274
26424	A_73_102350	FCGR3A	NM_001077402	ref|Bos taurus Fc fragment of IgG, low affinity IIIa, receptor (CD16a) (FCGR3A), transcript variant 1, mRNA [NM_001077402]	ACTGTATTTTTCTGTACGGAGACACCTTCAAAGCTCAGAGGAATGGAGGGATGGCAAAGT	1.6758	0.997315	0.00772397
1346	A_73_P205742	DYNLT1	NM_174620	ref|Bos taurus dynein, light chain, Tctex-type 1 (DYNLT1), mRNA [NM_174620]	TTTTGTTGTTGATGAAGTGAGCAACATCGTAAAAGAGGCCATAGAAAGCGCCATCGGTGG	1.66836	0.994019	0.0347366
23897	A_73_P147916	LDLRAD3	NM_001192619	ref|Bos taurus low density lipoprotein receptor class A domain containing 3 (LDLRAD3), mRNA [NM_001192619]	AGAATAACTGTCAAGACAACAGTGACGAGGAAAGCTGTGAGAGTTCTCAAGAACCAGGCA	1.66769	0.997999	0.0307292
53236	A_73_P277171	GATM	NM_001045878	ref|Bos taurus glycine amidinotransferase (L-arginine:glycine amidinotransferase) (GATM), nuclear gene encoding mitochondrial protein, mRNA [NM_001045878]	ACTGAGTTTGAGCCATGCTTTGATGCTGCTGATTTCATTCGAGCTGGAAGAGATATCTTC	1.6544	0.997556	0.0100338
6605	A_73_P048251	PARVB	NM_001102299	ref|Bos taurus parvin, beta (PARVB), mRNA [NM_001102299]	ATAATTAAAACGGCATTACAGCGTCTCTTGCGGGAGGCGGTGACATTAAAGATCCACGTT	1.59772	0.996938	0.0191058
37780	A_73_P453806	POLK	NM_001102258	ref|Bos taurus polymerase (DNA directed) kappa (POLK), mRNA [NM_001102258]	TAGAAACAGAGGAGAAATCACATAGCTGTCAGACATTTACCTGTCCTGTCTGCTTTAAGG	1.58479	0.997104	0.00284734
24766	A_73_P106881	CBLB	NM_001205923	ref|Bos taurus Cas-Br-M (murine) ecotropic retroviral transforming sequence b (CBLB), mRNA [NM_001205923]	GATGCAAAAATTGCAAAACTCATGGGAGAGGGTTATGCCTTTGAAGAAGTGAAAAGAGCA	1.57926	0.996018	0.0175311
8538	A_73_P030961	KLF15	NM_001082425	ref|Bos taurus Kruppel-like factor 15 (KLF15), mRNA [NM_001082425]	GCCCTGATCTAGAAGTGCATTCCTTGTTTTGTCTAGAAATTAATATCAAATGAACTAGCT	1.57832	0.994277	0.0242809
21182	A_73_P054346	EBD	NM_175703	enteric beta-defensin [ Bos taurus (cattle) ]	GAAACTGCGCCCTTCGACAGAACGTCTAAAATTTAAACCAGAATAAATTTTGTTCAAAGT	1.57182	0.995897	0.0364476
39042	A_73_P091216	PPFIBP1	ENSBTAT00000005615	PREDICTED: Bos taurus PPFIA binding protein 1 (PPFIBP1), transcript variant X13, mRNA	GTTGCCATGACAATTGAGACACTGGTGAATGAGAGTATAATTGTTTCTCCTCTATTTAAT	1.56521	0.997312	0.0275495
11894	A_73_102058	PLXDC2	NM_001077928	ref|Bos taurus plexin domain containing 2 (PLXDC2), mRNA [NM_001077928]	AGTGCTGGCTTACAGGTGTTAAGACTAAAAATTTGCCTATACCTTTAAGACAAACACACA	1.5567	0.997807	0.0150175
7845	A_73_P444341	FAM208B	ENSBTAT00000046340	PREDICTED: Bos taurus family with sequence similarity 208 member B (FAM208B), transcript variant X6, mRNA	ATGACCCATCTGCTCGACAGTGAGGATAGTGGAGCCGAGTTACAGGGAAGAGCCGTGGAT	1.55494	0.997665	0.0105362
8847	A_73_P113536	SEPP1	NM_174459	ref|Bos taurus selenoprotein P, plasma, 1 (SEPP1), mRNA [NM_174459]	ATAAAGGATCAAGACCCTATGCTGAACTCCTACGGTTCAGTGACTGTGGTTGCTCTTCTT	1.55485	0.997293	0.0141295
4656	A_73_P075976	LOC109569192	ENSBTAT00000038298	PREDICTED: Bos indicus ecto-ADP-ribosyltransferase 5 (LOC109569192), transcript variant X3, mRNA	AAGTCAGAAGTATATTTGGGAGAAGGGGAAGATGGATTGATTTGGGAATAGTTGTACCAG	1.55376	0.996356	0.017486
29261	A_73_P040966	EFEMP1	NM_001081717	ref|Bos taurus EGF containing fibulin-like extracellular matrix protein 1 (EFEMP1), mRNA [NM_001081717]	CTTTTCTGGAAAAGTGGGACCACGCAATGATTGTCTTCTGTGGTGCTTAAGGAAACTTAC	1.55336	0.996937	0.0156105
2554	A_73_P045266	CSF1R	NM_001075403	ref|Bos taurus colony stimulating factor 1 receptor (CSF1R), mRNA [NM_001075403]	CTCATCGTAACTAACAGTCACAAAGTGGAATGTCCCTGTCAGCATTAAACTAACCCCATT	1.55234	0.996797	0.0057614
10638	A_73_P097066	TRPM2	ENSBTAT00000029198	gb|PREDICTED: Bos taurus transient receptor potential cation channel, subfamily M, member 2 (TRPM2), mRNA [XM_584750]	ACCACAAGGTCATCCTCCAGAAAGTGGCCGCCTTGTTCATGGCCTACTACTGACCCGAGA	1.55016	0.996406	0.0230606
37535	A_73_103070	C3AR1	NM_001083752	ref|Bos taurus complement component 3a receptor 1 (C3AR1), mRNA [NM_001083752]	CAAATCATTAGGAATGCTCTCACTTGTGCAATAATGATATCCAAGATGATGTGATTTGTC	1.53894	0.996063	0.00913452
14588	A_73_P406596	NUP98	ENSBTAT00000011092	ens|NUP98 protein Fragment [Source:UniProtKB/TrEMBL;Acc:A6QQA0] [ENSBTAT00000011092]	ACAAATACCAGTGGGAATAGTATTTTTGGAAGTAAACCAGGACCTGGCACTCTGGGGACT	1.53573	0.996828	0.0419556
5316	A_73_P045011	IKBIP	NM_001081736	ref|Bos taurus IKK interacting protein (IKBIP), mRNA [NM_001081736]	GGACCTCTGTCATGTTATAAAAAGACTGACAGCCGGAAATAATGAAATTTTGGAGTAAAT	1.53315	0.997305	0.0384844
22628	A_73_P494688	SUHW2	NM_001077935	ref|Bos taurus zinc finger protein 280B (SUHW2), mRNA [NM_001077935]	TAAAAAATCTCAAGTTTATGAATCACATGAAGCACCATTTGGAACTTGAGAGGCAGAGAG	1.53315	0.993646	0.0348472
1105	A_73_P265866	CAMK2A	NM_001075938	ref|Bos taurus calcium/calmodulin-dependent protein kinase II alpha (CAMK2A), mRNA [NM_001075938]	ATACCTGTGTCAAGAAAACCTGTCCGTTCGTAAAAGCCATCATGACTTCAGAGCAGATGG	1.52249	0.996682	0.0384257
17238	A_73_P378871	LRRC28	NM_001038156	ref|Bos taurus leucine rich repeat containing 28 (LRRC28), mRNA [NM_001038156]	TCTGAGAACTTTACGTCATCTTCGGTTGGCTAATAACCAACTGCAGTTCCTACCTCCAGT	1.51573	0.996828	0.0460805
13882	A_73_P175377	CB459340	CB459340	gb|718958 MARC 6BOV Bos taurus cDNA 3', mRNA sequence [CB459340]	AGAACTGTTCTGTTCAACTAGAGATTCAAAATAAAGAACAGCTCCTACACACTTCTGACT	1.51563	0.996681	0.00604459
18397	A_73_P268846	ZFYVE9	ENSBTAT00000018986	gb|PREDICTED: Bos taurus zinc finger, FYVE domain containing 9, transcript variant 2 (ZFYVE9), mRNA [XM_863952]	ATCCATTGAATAGACCAAATGCAGAGGGGGATTCTGATAAGTATATATGTACTACTTCTG	1.50894	0.997289	0.00152816
29807	A_73_P036466	ACVR2B	NM_174495	ref|Bos taurus activin A receptor, type IIB (ACVR2B), mRNA [NM_174495]	ACTTTAAGAGCAAGAATGTATTGCTGAAGAGTGACCTCACTGCTGTGCTGGCTGACTTTG	1.50891	0.997214	0.0247598
16846	A_73_P421426	DYNC1H1	NM_001206138	ref|Bos taurus dynein, cytoplasmic 1, heavy chain 1 (DYNC1H1), mRNA [NM_001206138]	AGAGGAGTTAAGAGATTATGTCAAAGCCAGGCTGAAAGTCTTCTACGAGGAAGAGCTGGA	1.50576	0.996119	0.0252196
28230	A_73_P063396	MITF	ENSBTAT00000008786	ens|microphthalmia-associated transcription factor isoform M- [Source:RefSeq peptide;Acc:NP_001001150] [ENSBTAT00000008786]	TCATGCAACAGAGAGTGCCTGTGAGTCAGACTCCAGCCATAAACGTCAGCGTGCCCACCA	1.49576	0.997358	0.0261379
13595	A_73_P064866	PIGS	NM_001034216	ref|Bos taurus phosphatidylinositol glycan anchor biosynthesis, class S (PIGS), mRNA [NM_001034216]	AAATGCCTGTTTTTTGGGCCTAAGAGTGAAGGGATAATGACCTGGGAGTTAGACCGTTTG	1.49358	0.995189	0.0214268
262	A_73_P492783	SMURF1	ENSBTAT00000043725	gb|PREDICTED: Bos taurus Smad ubiquitination regulatory factor 1 (SMURF1), mRNA [XM_591663]	AAGACTTGAAAAAGCGACTCATGGTGAAATTCCGAGGAGAAGAAGGCTTGGACTATGGAG	1.49181	0.995452	0.0407678
32641	A_73_P283876	ATOH1	NM_001098099	ref|Bos taurus atonal homolog 1 (Drosophila) (ATOH1), mRNA [NM_001098099]	CCACTACTGCGGCTCTGGGACAAACTCAACTGCCAATTGCAGACCAGTTTTTTATTTTTT	1.47958	0.996387	0.00983502
10932	A_73_104848	DOCK3	XM_002702777	gb|PREDICTED: Bos taurus dedicator of cytokinesis 3 (DOCK3), partial mRNA [XM_002702777]	CCAATTGGTATTCAGCCCTATAAATCGTGTTTTTAACCTCTGGCATTCTGTGCTTATTTA	1.47846	0.995068	0.0152317
8122	A_73_P052701	HMGN5	ENSBTAT00000034343	PREDICTED: Bos taurus high mobility group nucleosome binding domain 5 (HMGN5), partial mRNA	GAAACCAAGAAAGAAGATGTTAAAGACTACAACAACGAAACTGCTGAAAATGGAGGGGCC	1.47652	0.990407	0.0315232
51273	A_73_106038	LOC533894	XR_082763	gb|PREDICTED: Bos taurus low density lipoprotein receptor-related protein 1 (LOC533894), miscRNA [XR_082763]	TTAATAATTTTTGCTGAATTCCTTTACAACTAAATAACACAGATATTGTTATAAATAAAA	1.47618	0.994876	0.0142718
13888	CUST_1639_PI427023673	STARD3	ENSBTAG00000011729	PREDICTED: Bos taurus StAR related lipid transfer domain containing 3 (STARD3), transcript variant X1, mRNA	AGAAGAATAACGAATATGGGGACACTGTGTACACCATCGAGATTCCCTTTCACGGCAAGA	1.47391	0.995351	0.014765
35148	A_73_P389606	PLEKHA5	ENSBTAT00000023359	PREDICTED: Bos taurus pleckstrin homology domain containing A5 (PLEKHA5), transcript variant X12, mRNA	CTAGGATGACTGTGGAAGAGCAAATGGAAAGAATCAGGAGGCATCAACAAGCATGCTTAA	1.46415	0.994571	0.04056
2091	A_73_113890	AQP9	NM_001205833	ref|Bos taurus aquaporin 9 (AQP9), mRNA [NM_001205833]	CCTTTAATAGACAGTAATAGACTGACATATGGCATTTCTTCTTGCTCTGAAACTACTGGC	1.46357	0.99477	0.0266236
17829	A_73_P034831	SEMA3C	NM_001101082	ref|Bos taurus sema domain, immunoglobulin domain (Ig), short basic domain, secreted, (semaphorin) 3C (SEMA3C), mRNA [NM_001101082]	CTTAATGTTGTCTTAAGTGGGACTTATGCTTCCATTAATAAAGGTCTGTCTTCAATGATC	1.4616	0.992493	0.0467249
28841	A_73_P397001	MAP7D3	ENSBTAT00000048938	PREDICTED: Bos taurus MAP7 domain containing 3 (MAP7D3), transcript variant X3, mRNA	AGACGAAGTTCATCTTTGAATAGAAGATGTAGCAGACTGCATTCATCTACAGAAACAGAA	1.45914	0.994334	0.0488071
23158	A_73_102072	CLEC4D	NM_001193117	ref|Bos taurus C-type lectin domain family 4, member D (CLEC4D), mRNA [NM_001193117]	GGAGTGATTTTCCTTGTGACTCTAAGACAAGTTGGATTTGCAAGATAACTGGAACTGCAT	1.45904	0.99405	0.0193229
11631	A_73_P098536	AY741373	AY741373	gb|Bos taurus clone NG010008A10D09 mRNA, partial sequence. [AY741373]	TGAGGGGGTAATGTTAGGTAGTTAGAATAGGAAACATGTCCAGAATGGCGGTGGCTAAAA	1.45843	0.99486	0.0300494
34034	A_73_P064306	RALBP1	ENSBTAT00000061174	PREDICTED: Bos taurus ralA binding protein 1 (RALBP1), transcript variant X4, mRNA	TGAAAACGAGGAAGTCATAAATATTCTTCTTGCCCAGGAGAATGAGATCCTGACTGAGCA	1.453	0.994696	0.045982
2153	CUST_923_PI427023673	KIF7	ENSBTAG00000002440	kinesin family member 7 [Source:HGNC Symbol;Acc:HGNC:30497]	AAGGTGCAGATTTCTACCAGTCACTTCCTTTAGGATGTGGTACCCAGTTGCCATGTTTTG	1.44386	0.993765	0.0161338
10701	A_73_P265751	ANK3	NM_001105620	ref|Bos taurus ankyrin 3, node of Ranvier (ankyrin G) (ANK3), mRNA [NM_001105620]	TTCATAACAGTAAACGGTCAACCAACGTGGATCATGTGTTTTTACTGCCAGTATTGAGAA	1.43933	0.995535	0.025825
27839	A_73_P122821	COL7A1	ENSBTAT00000025418	ens|PREDICTED: Bos taurus misc_RNA (LOC507133), miscRNA. [Source:RefSeq DNA;Acc:XR_028527] [ENSBTAT00000025418]	ACGCTAGTGATGACATGGTGCTGATTCTGGGGGGTCATTAAAGCTGCTGTTTTAAAAGGC	1.42998	0.992715	0.0468715
25574	A_73_P134861	CN437235	CN437235	gb|BE04012A1A01 Normalized and Subtracted bovine embryonic and extraembryonic tissue Bos taurus cDNA clone BE04012A1A01 5, mRNA sequence [CN437235]	TGTTTTAAGCGGTGTTTACTTTGGATTTCTGGGTATTAAATAAAAGCCACTGAAACCCTG	1.42961	0.991931	0.0209314
35654	A_73_P090516	LOC781146	NM_001080336	ref|Bos taurus lysozyme (LOC781146), mRNA [NM_001080336]	TATTTCAGATCAACAGCAAATGGTGGTGTAATGATGGCAAAACCCCAAACGCAGTTAACG	1.42774	0.990962	0.0352134
1153	A_73_P250851	C2	NM_001034492	ref|Bos taurus complement component 2 (C2), mRNA [NM_001034492]	TAATCTCAAGACAGGGTCAGAGTGGACAAACTGTGTCAAGGTCGTCCTCAAAGACAAAAC	1.42418	0.993917	0.0253438
4426	A_73_P060361	DUSP5	ENSBTAT00000027029	ens|PREDICTED: Bos taurus misc_RNA (DUSP5), miscRNA. [Source:RefSeq DNA;Acc:XR_042993] [ENSBTAT00000027029]	TTACCTCATGAAGACCAAGCAGTTCCACCTGAAGGAAGCCTTTGATTACATCAAGCAGAG	1.42094	0.992423	0.0365122
12884	A_73_P122656	CADPS	NM_001076020	ref|Bos taurus Ca++-dependent secretion activator (CADPS), mRNA [NM_001076020]	AGAGTCCAGTGATGCTTCATTAATGTGCTGTGTGTGCGCGTTGACAGTAAATGGATATGA	1.4204	0.991401	0.0400629
33772	CUST_457_PI427023673	CEP162	ENSBTAG00000003384	Bos taurus centrosomal protein 162kDa (CEP162), mRNA. [Source:RefSeq mRNA;Acc:NM_001206593]	ATTGAGAAATGGAAAAGACTTGCACAGCTGAAGAATCGGGAGCTGGACAAGTTCCGAACA	1.42002	0.995061	0.0202904
99	A_73_P049266	OSGIN1	NM_001077129	ref|Bos taurus oxidative stress induced growth inhibitor 1 (OSGIN1), mRNA [NM_001077129]	AGATGCTGTACCCCGAGTACCACAAGGTTCACCAGATGATGCGCGAGCAGTCCATCCTGT	1.41978	0.993594	0.042778
18919	A_73_P126176	TMTC2	ENSBTAT00000003752	gb|PREDICTED: Bos taurus transmembrane and tetratricopeptide repeat containing 2-like, transcript variant 1 (TMTC2), partial mRNA [XM_616512]	TCTAATGAACCAAGGAAAGTCAGAAGAAGCGCGACGCACATTCCTGAAGTGTTCTGAGAT	1.41612	0.993163	0.018809
11215	A_73_103794	TBC1D2	NM_001101981	ref|Bos taurus TBC1 domain family, member 2 (TBC1D2), mRNA [NM_001101981]	ATAGGGTTAACCTTGAACATTCTCTAAGTTTTATCTGTGTATAACAGTGTAAATACTGGA	1.41607	0.984378	0.0471352
34017	A_73_P093131	LOC613309	ENSBTAT00000054157	ens|PREDICTED: Bos taurus misc_RNA (LOC613309), miscRNA. [Source:RefSeq DNA;Acc:XR_027651] [ENSBTAT00000054157]	GTGAGCGCTGTATCTGTAATTTTTCTGGCCCATCACTTTAAAAGAAGACGTGGAAAAAAG	1.41549	0.993413	0.0298333
31075	A_73_111224	CHRM5	TC451694	Bos taurus cholinergic receptor, muscarinic 5 (CHRM5), mRNA	GTTCTGCCGATGGAAAAAGAAAAAAGTGGAAGAGAAGTTGTACTGGCAGGGGAACAGTAA	1.41498	0.993646	0.0375636
33335	A_73_P038256	MYRFL	NM_001102323	PREDICTED: Bos taurus myelin regulatory factor-like (MYRFL), transcript variant X1, mRNA	TGTATATGTGTGTGCGTGCACTTGAACTACATACACTATAACTTGCTAATAAACTGGATT	1.41196	0.989498	0.0370492
10734	CUST_2572_PI427023673	STX2	ENSBTAG00000007988	PREDICTED: Bos taurus syntaxin 2 (STX2), transcript variant X2, mRNA	AGAAGGAAAAAGTGGATAATTGTGGCTGTGTCACTGGTTCTGTTGGCTGTGATTGCTCTA	1.41156	0.993607	0.0494679
28213	A_73_108082	MEIS1	NM_001083507	ref|Bos taurus Meis homeobox 1 (MEIS1), mRNA [NM_001083507]	TGAGCAAAGCATCGGTCATGTGTGTATTTTTCCATAGTCCCACCTTGGAGCATTTATGTA	1.4114	0.993214	0.0383214
11127	A_73_P341246	NRP2	NM_001193237	ref|Bos taurus neuropilin 2 (NRP2), mRNA [NM_001193237]	ATGACAAAGATTTGCAGCTCCCTTCAGGATTCAATTGCAACTTTGATTTCCCGGAGGAGC	1.41137	0.995035	0.0409727
8224	A_73_P504893	LOC511531	ENSBTAT00000032697	tc|Rep: PREDICTED: guanylate binding protein 1, interferon-inducible, 67kD isoform 3 - Pan troglodytes, partial (5%) [TC459428]	CGAATACTTGAAGTCCAAGGAGTCTGTGACTGATGCAATTCTACAAACAGACCAGACACT	1.41052	0.992015	0.0447806
30386	A_73_P315586	ADAMTS2	NM_174631	ref|Bos taurus ADAM metallopeptidase with thrombospondin type 1 motif, 2 (ADAMTS2), mRNA [NM_174631]	CCAAGAGCTCATTGATGAGATGAGGAAGAAAGAGATGCTCGGAAAGTTCTAATAAAATGG	1.40938	0.993837	0.00914464
13248	A_73_P096331	GP5	ENSBTAT00000017571	gb|Bos taurus glycoprotein V (platelet) (GP5), mRNA [NM_001192564]	TTTGCGATGATTAAACTCTGCAGGCTCTTTCGGAAATTAATCACAGAGCTCTGGTTTGAG	1.40911	0.992055	0.0319403
18117	A_73_P340036	SCARB1	NM_174597	ref|Bos taurus scavenger receptor class B, member 1 (SCARB1), mRNA [NM_174597]	TGGAGTCAGCAAGGTCAACTATTGGCATTCCGATCAGTGCAACATGATTAACGGAACTTC	1.40667	0.992266	0.0450946
44251	A_73_P238060	IL15RA	ENSBTAT00000007987	gb|PREDICTED: Bos taurus interleukin 15 receptor, alpha-like (IL15RA), mRNA [XM_866719]	TTGTAGTATGCCTGGTGTTTCTTCTGGGACGTTGCCTGTGGTCAAGGCGAGCCCACCAGA	1.40318	0.993191	0.0171777
31383	A_73_P330311	GRK5	NM_174331	ref|Bos taurus G protein-coupled receptor kinase 5 (GRK5), mRNA [NM_174331]	AAACCTGAAAATATCCTGTTAGACGATTACGGCCACATTAGAATTTCGGACCTGGGCCTG	1.4031	0.992045	0.0149017
14166	CUST_324_PI427023673	CEP55	ENSBTAG00000005129	centrosomal protein 55 [Source:HGNC Symbol;Acc:HGNC:1161]	TGAAAACAGAGGAAAAGTCGCCTCACCAAAATGTCCCACTGCTGCGTTAAATGAAAGCCT	1.40262	0.989885	0.0414781
32600	CUST_1342_PI427023673	CTDSPL	ENSBTAG00000013402	CTD small phosphatase-like protein [Source:RefSeq peptide;Acc:NP_001180010]	GGGCGAATGTGGCCATACCTACCTGATTTCTTTTTTAAGAACAGAAACAACTATTTTAAA	1.40149	0.992459	0.0291955
30557	A_73_106192	ITPR2	NM_174369	ref|Bos taurus inositol 1,4,5-trisphosphate receptor, type 2 (ITPR2), mRNA [NM_174369]	GAGAACAATTTTTAACTGTGTTTTCATGGTTGAGAAGACCAAACTTAAAATGCAGCCGCT	1.40121	0.994932	0.0371664
23495	CUST_571_PI427023673	SYNE2	ENSBTAG00000025450	PREDICTED: Bos taurus spectrin repeat containing nuclear envelope protein 2 (SYNE2), transcript variant X10, mRNA	AAATACGGGAGCAAAGAATCTGTGGAATTATTGCTGGAAGACTGGCATGAAAAATTTTTG	1.39903	0.992389	0.0420729
37654	A_73_119331	APLP2	XM_001251234	gb|PREDICTED: Bos taurus amyloid beta (A4) precursor-like protein 2 (APLP2), mRNA [XM_001251234]	CTGTTTGTTCCAGCTCCACTGTGTAAACCACCTCTTTAAGGCTCACTGTCCTGGTTTTTA	1.3978	0.991894	0.0407293
11186	A_73_P329701	LOC512486	ENSBTAT00000023500	ens|LOC512486 protein Fragment [Source:UniProtKB/TrEMBL;Acc:Q3T0I1] [ENSBTAT00000023500]	AGGAAAAGTTGATTGAAGTGGAACGTGTGAGAGCTGAATCTGCACAGGCTGCAGCAAAAA	1.39332	0.99062	0.0476832
35333	A_73_P270226	AOX1	NM_176668	ref|Bos taurus aldehyde oxidase 1 (AOX1), mRNA [NM_176668]	AAGGCATCTTTCACCCAGTTATAATTTCTCCTGATAGAATTGAAGAACTGAGTGTTGTAA	1.39147	0.990853	0.0194837
8482	A_73_P266531	HCFC1	ENSBTAT00000015793	gb|PREDICTED: Bos taurus Host cell factor (predicted)-like (HCFC1), mRNA [XM_590515]	CAAAATCATCACGGCTGTTCCCAAAATCGCTACGGGTCACGGGCAGCAAGGAGTGACCCA	1.3896	0.994065	0.0211496
8262	A_73_117861	LOC100296627	ENSBTAT00000020806	PREDICTED: Bos taurus multidrug resistance protein 1 (LOC100296627), transcript variant X10, mRNA	CATCAATATCATTGAAAAAATTCCTCTGATCGACAGCTACAGCACAGAAGGCCTAAAGCC	1.38525	0.992406	0.046076
32189	A_73_P316457	AHNAK	ENSBTAT00000017912	Neuroblast differentiation-associated protein AHNAK isoform X6	GTGGATGTGAGTCTGCCTAAAGCTGATATTGACATCTCTGGACCCAAGGTGGATATTGAA	1.38194	0.993498	0.0177285
41706	A_73_P170367	AV614201	AV614201	gb|AV614201 Bos taurus adipocyte cell line Bos taurus cDNA clone E1AD003F03 3', mRNA sequence [AV614201]	GAGGCTCCATTTATCCTACTAATGTTCAAATAAATGAGAATTTTCTACACGGACACAGAG	1.37552	0.994162	0.0473968
34182	A_73_P036323	SERPINA3-1	NM_174768	ref|Bos taurus serpin peptidase inhibitor, clade A (alpha-1 antiproteinase, antitrypsin), member 3 (SERPINA3-1), mRNA [NM_174768]	ATAGTTCTCAAAGACACCCAGAGCATCATCTTTTTGGGGAAAGTCACCAACCCCAGTGAA	1.3748	0.992188	0.0403664
34532	A_73_P360651	FOXRED1	NM_001034371	ref|Bos taurus FAD-dependent oxidoreductase domain containing 1 (FOXRED1), nuclear gene encoding mitochondrial protein, mRNA [NM_001034371]	AAGGATTAGGCAACAACTACCTGGGCAGCTTGTAGCCCCACAGAGGAGGAGGAACCAGAC	1.37345	0.990356	0.0259724
30983	A_73_P069746	RGNEF	NM_001102307	ref|Bos taurus 190 kDa guanine nucleotide exchange factor (RGNEF), mRNA [NM_001102307]	GTCCAAAGTACTTTAGGAGTAATGTTTAATATTTTGTGCAGGTTTATTTGAGGGGCATGA	1.37069	0.990977	0.0220673
17081	A_73_P070101	CDH10	NM_001076266	ref|Bos taurus cadherin 10, type 2 (T2-cadherin) (CDH10), mRNA [NM_001076266]	TGAGTTCCTTGGAATCAGGTACCACTGATGGAGACCAAAACTACGATTACCTCCGAGAAT	1.36629	0.989656	0.0212015
22272	A_73_P155127	SPAG17	NM_001206874	ref|Bos taurus sperm associated antigen 17 (SPAG17), mRNA [NM_001206874]	CATGATCCTCTCAGCCTACAGACGATGACAAAGAATGGAAGTCATCACGATACACTCATC	1.36571	0.990882	0.0343143
3934	A_73_115745	ECHDC3	TC444581	Bos taurus Enoyl-CoA hydratase domain-containing protein 3, mitochondrial isoform X2	AACCTGAACCCTAGGATTACTTCACCTAATTTCTCCTTCATACATTGACTTACTCATTCA	1.36514	0.99116	0.0444695
19380	A_73_P149591	LOC616063	TC442875	PREDICTED: Bos taurus myeloid-associated differentiation marker (LOC616063), mRNA	TCCTGTTTATTAGTCACACCCTCCTGATTATGAAACAGACTGGGACCTGAGATCCTTTGC	1.36273	0.990355	0.0436278
31782	A_73_P037806	IRAK2	NM_001075696	ref|Bos taurus interleukin-1 receptor-associated kinase 2 (IRAK2), mRNA [NM_001075696]	GAAAAAGATCTAAGGAAGAATCGCGATCTCCCAGGAAACACCAAACATCAGCTTCCCTTG	1.36101	0.991807	0.0454922
37775	CUST_518_PI427023673	FAM20C	ENSBTAG00000003607	FAM20C, golgi associated secretory pathway kinase [Source:HGNC Symbol;Acc:HGNC:22140]	CCACTATGAGACCTTCGAGAAGTTTGGGAACGAGACGTTTATCATCCACTTGGACAACGG	1.3609	0.991767	0.0496856
10888	A_73_110370	LOC781126	XM_001249508	gb|PREDICTED: Bos taurus transmembrane and tetratricopeptide repeat containing 2 (predicted)-like (LOC781126), mRNA [XM_001249508]	GTGGTAAACCATTAAGGTCAAGTTCATGGGCGGTGATTGAAGTGTGGTGTGAATTCTGGT	1.36035	0.988694	0.0216054
21578	A_73_P109141	THBS1	NM_174196	ref|Bos taurus thrombospondin 1 (THBS1), mRNA [NM_174196]	AATGACTTTGGTTGGCTTTTGCAAAAGCAAAAGCATCCACATGCTTTGGTTGGAAGGTGC	1.35872	0.992424	0.0349349
29501	CUST_1622_PI427023673	HEG1	ENSBTAG00000021396	heart development protein with EGF like domains 1 [Source:HGNC Symbol;Acc:HGNC:29227]	CCATCTTTCATCAGTGATGAGAGCAGGAGAAGAGACTACTTCTAAATGCAGAAGAGAGAG	1.35411	0.987554	0.0458012
35323	A_73_P355956	ZNF667	NM_001102078	ref|Bos taurus zinc finger protein 667 (ZNF667), mRNA [NM_001102078]	AAGCAGTGACTTTATCATGTATGTTAGTTTCAAAATAACAAGCTCAGATGATTGGGTCAG	1.35182	0.988835	0.0298232
30397	A_73_116131	TC488624	TC488624	Bos mutus isolate yakQH1 chromosome 15	AAACAACCTGGAAGGATATAGGCAAGGTTTATCTGTACCTTCTAGTCTTCCTACATTGAA	1.35091	0.986713	0.0385173
48159	A_73_P418721	SCPEP1	NM_001045909	ref|Bos taurus serine carboxypeptidase 1 (SCPEP1), mRNA [NM_001045909]	TCTCAGAGTCTTATGGAGGAAAGATGGCTTGCTGGCATCGCTCTAGAACTTTATAAGGCT	1.34739	0.988774	0.0197051
7653	A_73_P114021	GUCY1A2	NM_001191341	ref|Bos taurus guanylate cyclase 1, soluble, alpha 2 (GUCY1A2), mRNA [NM_001191341]	TCGAAAATAAAAAAGGTTTCCTACAACATTGGCACTATGTTCCTCCGGGAGACAAGCCTC	1.3457	0.990488	0.0254576
17070	A_73_P451601	LOC104974256	ENSBTAT00000021483	PREDICTED: Bos taurus liprin-beta-2-like (LOC104974256), transcript variant X2, mRNA	TGAAACGTATCAGGAACGCTTAGCACGCCTAGAAGGAGATAAGGAGTCCCTCATATTACA	1.34483	0.987765	0.0391363
14213	A_73_P080081	PRTG	ENSBTAT00000007689	protogenin [ Bos taurus (cattle) ]	TTATACTTTCTACATTGTGGCATATATGCCAATGGGGGCCAGTCAGATGTCCGACCATGT	1.34314	0.991937	0.0236251
9854	A_73_P488318	NP9568160	NP9568160	tc|GB|XM_583812.2|XP_583812.2 similar to olfactory receptor [NP9568160]	AGCCTGAGAAACCAGGACATAAAAGGGGCTCTTGGAAAAGTGATTGCTATGAAATTTTTT	1.34301	0.991547	0.045856
341	A_73_P092192	CD1A	NM_001075382	ref|Bos taurus CD1a molecule (CD1A), mRNA [NM_001075382]	TTTTGGCTTTGGAAGCACTGGACACACCATGAATCCCCAAGCTCTATTCTTCCTTTGGAA	1.34249	0.98758	0.0459815
19510	A_73_P101506	TLR2	NM_174197	ref|Bos taurus toll-like receptor 2 (TLR2), mRNA [NM_174197]	TCTTTGATGAGAACAATGATGCTGCCATTCTGATTCTGCTGGAGCCCATTGACAAGAAGG	1.3416	0.988996	0.0217627
16398	CUST_2740_PI427023673	ZNF814	ENSBTAG00000039946	Bos taurus zinc finger protein 814 (ZNF814), mRNA	ATCTCCTTGGTGATCCCAGATCATGGTGTTTTAGGACTCAGATGTCTTTCTCAAGAACCT	1.34144	0.990912	0.00927931
16848	A_73_101663	MPP6	ENSBTAT00000054769	ens|MPP6 protein Fragment [Source:UniProtKB/TrEMBL;Acc:A7E3B6] [ENSBTAT00000054769]	CAGGGTCTGCTTCATGTGGGAGATATCATTAAAGAAGTCAATGGCCATGAAGTTGGAAAC	1.33928	0.989536	0.0282798
34076	CUST_244_PI427023673	CFAP53	ENSBTAG00000002660	coiled-coil domain-containing protein 11 [Source:RefSeq peptide;Acc:NP_001291505]	CTATGGAACAGGAACGTATAAATGAAGGTCTTAAAGAGCTTAACTGTGAAGAGAGGGAGA	1.33828	0.989435	0.0363473
15975	A_73_P368996	ASB11	NM_001034413	ref|Bos taurus ankyrin repeat and SOCS box containing 11 (ASB11), mRNA [NM_001034413]	ACAGTGTGGAAATCATCCACCTGCTGATAGACTACGGGGCTAACCTCAAATGCAAAAATG	1.33747	0.989005	0.0406607
23449	A_73_107470	LOC507426	ENSBTAT00000045795	ens|PREDICTED: Bos taurus misc_RNA (LOC507426), miscRNA. [Source:RefSeq DNA;Acc:XR_028255] [ENSBTAT00000045795]	TTTTCCCAGAGCGAATATCTCATCTACCAGGAGAGCCAGCGCTGCCTGCGCTACCTGCTA	1.33542	0.985599	0.0353111
23001	A_73_P440631	KRT78	NM_001102077	ref|Bos taurus keratin 78 (KRT78), mRNA [NM_001102077]	AATCAGTGGGCCGAGGCAGGACTGGCTTCAGCAGCAGGAGCCTCAGTTCCTTTGGGGGTT	1.3291	0.990751	0.0265521
11299	A_73_121126	ABCA3	NM_001113746	ref|Bos taurus ATP-binding cassette, sub-family A (ABC1), member 3 (ABCA3), mRNA [NM_001113746]	CAAGCGGCTGTCCGTGGAGGGCGCACCTAATGCGCAGTGATTGTCTGGAAAATAAAGGCT	1.32662	0.989397	0.0368566
35854	A_73_103774	PKP4	NM_001191491	ref|Bos taurus plakophilin 4 (PKP4), mRNA [NM_001191491]	TCTAATTACTTGTAGATTCTATAGTCTGGTGAAGGTGTGGGCGATGTGATGAGAGGTTTA	1.32386	0.982807	0.0428835
41722	A_73_104462	SNX33	TC442679	PREDICTED: Bos indicus sorting nexin 33 (SNX33), mRNA	CAGAAACTGACAGATGCCACTGCTGGCCTTCCCAGGAGGTCATGGCTATTTCTGGCTGCT	1.31946	0.983898	0.0343512
24759	A_73_P490178	NP9571706	NP9571706	tc|GB|XM_001250824.1|XP_001250825.1 similar to CTAGE family, member 5 [NP9571706]	TGTGTCAGATCCGCAACCTCTCCAAGAAGATAGCTGGAGACATGAGCAAAGAATTAGAGA	1.31779	0.989646	0.0450193
22939	A_73_P313286	TPM2	NM_001010995	ref|Bos taurus tropomyosin 2 (beta) (TPM2), mRNA [NM_001010995]	CCTCCAGAAAAAGCTAAAAGGGACGGAGGACGAGGTGGAAAAGTATTCTGAATCAGTGAA	1.31493	0.985378	0.0357201
34480	CUST_1614_PI427023673	ZBTB40	ENSBTAG00000016448	zinc finger and BTB domain containing 40 [Source:HGNC Symbol;Acc:HGNC:29045]	AACGGAGCATGCAGACGTGAAGTTCCATGAGTGTGACCAGTGCAAGGAGCTCTTCCCCAC	1.31328	0.988306	0.0339778
36978	A_73_P137856	CO881332	CO881332	gb|BovGen_09657 normal cattle brain Bos taurus cDNA clone RZPDp1056N0528Q 5', mRNA sequence [CO881332]	TTCACATCACAAGTTTAGGACTACAAAGCCACAGTATTTAGAGCATCACTTTAACCCTGC	1.31327	0.985732	0.0386998
5665	A_73_P083161	LHX2	NM_001191175	ref|Bos taurus LIM homeobox 2 (LHX2), mRNA [NM_001191175]	TGCCACGTGCCTTAGGAATACTGTTTTATCTCCATACTTTGGATGACTTGTTCATTTTTT	1.31297	0.98229	0.0292273
32585	A_73_P414831	ECM1	NM_001099706	ref|Bos taurus extracellular matrix protein 1 (ECM1), mRNA [NM_001099706]	AGATCTGCCTTCCTAGTCGTCAGCATGTGGTATACGGCCCTTGGAACCTACCACAGACTG	1.31216	0.982608	0.0432223
43675	A_73_102116	CTNND1	NM_001192402	ref|Bos taurus catenin (cadherin-associated protein), delta 1 (CTNND1), mRNA [NM_001192402]	GCCTTTCCTGTTTTTCTTTCTCTCTTGTTAATGCTTTAAAAACAAATGAGTTTTTATACA	1.30866	0.986115	0.0406607
50673	A_73_100746	OR6A2	ENSBTAT00000025482	tc|GB|XM_607367.3|XP_607367.2 similar to olfactory receptor I7 [NP9555571]	CTGCCTGCGCAACCAAGAAGTAAAGAGAGCCTTACGCCATACTCTACACCTGCACCAGGG	1.30802	0.986484	0.0454833
50834	A_73_P377646	SPRED1	NM_001192516	ref|Bos taurus sprouty-related, EVH1 domain containing 1 (SPRED1), mRNA [NM_001192516]	CTAGAAGGCTAACTCATAATGTTACCTGAATCCCTTATGTGGAAATTTTCTCTTGAGTAA	1.30428	0.982366	0.0403267
9910	A_73_113344	SLC28A3	TC481008	PREDICTED: Ovis aries solute carrier family 28 (concentrative nucleoside transporter), member 3 (SLC28A3), transcript variant X2, mRNA	CAGAAGCTGTGGTTACAAACAAATTCTCTGACACCACAGAAGCCTTAGGGTCACAGCTAA	1.30293	0.985764	0.0248051
6986	A_73_P113796	RGSL1	NM_001192209	ref|Bos taurus regulator of G-protein signaling like 1 (RGSL1), mRNA [NM_001192209]	AGAAAAGGATGTTCTCTATGCCAGGAAGTCCAATGTGAAGAAGAAAGCCAAGAGCCACCT	1.30273	0.986788	0.0393716
31829	A_73_P055221	LOC531225	ENSBTAT00000057024	PREDICTED: Bos taurus olfactory receptor 8B3 (LOC531225), mRNA	CCTTAATTTACAGCTTGAGGAACAAAGATGTTAAGCTTGCTCTGAGAAAAACTTTGAGAA	1.30263	0.985494	0.0360631
20931	CUST_2500_PI427023673	TBC1D9	ENSBTAG00000018951	PREDICTED: Bos taurus TBC1 domain family member 9 (TBC1D9), mRNA	CCAAGGCAAAGAATGCAAAGGATTTACCAAAATTGAATCAGGGGCAATTTATCGAGCTTT	1.29965	0.983997	0.0346678
8856	A_73_P355146	TEAD3	ENSBTAT00000025965	PREDICTED: Bos taurus TEA domain transcription factor 3 (TEAD3), mRNA	ATCAACTTTATCCACAAGCTCAAGCACCTGCCAGAGAAATACATGATGAACAGCGTCCTG	1.29868	0.984993	0.0392098
53952	A_73_P109451	KIR3DL2	NM_001098089	ref|Bos taurus killer cell immunoglobulin-like receptor, three domains, long cytoplasmic tail, 2 (KIR3DL2), mRNA [NM_001098089]	TGACAAGTTTATCCTGTACCAAGAAAGCAGCACAAGGCATTTCCAGAGACGTGGAGAGAT	1.29806	0.979387	0.0472071
26650	A_73_P050916	OSMR	ENSBTAT00000047019	ens|oncostatin M receptor [Source:RefSeq peptide;Acc:NP_001073741] [ENSBTAT00000047019]	CTCCACTACGGAAATGACAGATTTATTTTGTGTGTGCTTGTGGATATATTCTCATTTCTT	1.29592	0.982629	0.0328417
28700	A_73_P467828	HRH1	NM_174083	ref|Bos taurus histamine receptor H1 (HRH1), mRNA [NM_174083]	ACTTCTTGTTAGAGCGAGAAGATACTTCCTTATCACTTCAGCCAAGAGTGAGCCGTAGCT	1.2956	0.984038	0.0414552
51379	A_73_P122051	DV932275	DV932275	gb|LB03025.CR_E21 GC_BGC-30 Bos taurus cDNA clone IMAGE:8141567, mRNA sequence [DV932275]	GCAGTTTTAGAGCACAGTCTTACGGAATGAAATCTACAGAGAAAGTTAATGCAAGGGTGT	1.29352	0.983424	0.0361304
9638	A_73_P101866	SSPO	NM_174706	ref|Bos taurus SCO-spondin homolog (Bos taurus) (SSPO), mRNA [NM_174706]	ATCGCTATGCCCCTGGCAGTGCTACTATGAAGGACTGCAACCACTGTGTCTGCCAGGAGA	1.28849	0.978434	0.0468122
40163	A_73_102401	TULP3	NM_001098992	ref|Bos taurus tubby like protein 3 (TULP3), mRNA [NM_001098992]	TGTGTAGATGTGTGTGGATTCACATACGTGTGCGCGCACATATATGTTTGTACACCCCTA	1.28735	0.980458	0.0453266
30065	A_73_103578	LOC618016	XM_870347	ref|PREDICTED: Bos taurus UDP-GlcNAc:betaGal beta-1,3-N-acetylglucosaminyltransferase 2-like (LOC618016), mRNA [XM_870347]	ATGATTGTGCAAATGTGGCTTTATTTGAAGCACTGTGGGTTCAAGGGCGATGATGATGTT	1.28684	0.981255	0.0233613
11817	A_73_110883	MR1	NM_001190298	ref|Bos taurus major histocompatibility complex, class I-related (MR1), mRNA [NM_001190298]	GAAGAAATTTTCCAAGATACCGATTATGGGAGCATTCTTCCCAGTGGGGATGGGACCTAT	1.2846	0.982839	0.0311435
22041	A_73_P336016	SLC11A2	NM_001101103	ref|Bos taurus solute carrier family 11 (proton-coupled divalent metal ion transporters), member 2 (SLC11A2), mRNA [NM_001101103]	CTGTTATCATGCCACACAACATGTACCTGCATTCTGCCTTAGTTAAGTCCAGACAGGTAG	1.27315	0.980359	0.0450222
10761	A_73_112350	DOCK4	ENSBTAT00000028230	gb|PREDICTED: Bos taurus dedicator of cytokinesis 4 (DOCK4), partial mRNA [XM_613918]	TATAAAGTGAATCACATCTGGAAATTCCGCTACGACAGACCGTTTCACAAAGGCACAAAA	1.26942	0.979906	0.0393025
33884	A_73_109841	CD36	ENSBTAT00000050352	ens|Platelet glycoprotein 4 (Platelet glycoprotein IV)(GPIV)(Glycoprotein IIIb)(GPIIIB)(PAS IV)(PAS-4)(CD36 antigen) [Source:UniProtKB/Swiss-Prot;Acc:P26201] [ENSBTAT00000050352]	ATTGACCTTCATGTGCTCAAATCATGCCATTTTACATGAATTTCACAGCTAATCCCTAAT	1.26557	0.9791	0.0306612
19650	A_73_P260776	KRT80	NM_001077952	ref|Bos taurus keratin 80 (KRT80), mRNA [NM_001077952]	AAACTCACATCTCAATTCTTGTGTTGCCTCTGACTAGGAACCAAAGTGAGTGCCCTCACT	1.26536	0.977317	0.0448796
1158	A_73_P080396	PPP1R36	ENSBTAT00000010271	protein phosphatase 1 regulatory subunit 36, transcript variant X1	CAGGATACACTGGACTTAGTCATGAGAACACTGTCCTCTCAAACAACATTCCCTAAATAA	1.26455	0.978268	0.0493999
12093	A_73_P117071	BDH2	DV781979	gb|Hw_Fat_39_050806_C09 Bos taurus CF-24-HW fat cDNA library Bos taurus cDNA, mRNA sequence [DV781979]	CGGGACATCAAGGAAAATGAAACCTTTTGATGATGTCATTGGTTCCAAGAATCTGAAGTC	1.23972	0.972476	0.0360603
22614	CUST_774_PI427023673	DSC2	ENSBTAG00000040584	desmocollin 2 [Source:HGNC Symbol;Acc:HGNC:3036]	ATGAAGAGATGAGTGCCTTCTAGATGGTCTACAAAAGCCAATGGGTTTATCGTCTTTTTT	1.23126	0.970948	0.0466338
42626	A_73_P251786	PAG11	NM_176623	ref|Bos taurus pregnancy-associated glycoprotein 11 (PAG11), mRNA [NM_176623]	ATGCTTGGACTTGTTCAGGAATCATTCAGGCCAGTCCTAACACACACTTGCTCACACTTA	0.816011	0.0418077	0.0482024
49736	CUST_312_PI427023673	COX6B1	ENSBTAG00000023487	cytochrome c oxidase subunit 6B1 [Source:RefSeq peptide;Acc:NP_788848]	ATCCCCACCCTGGGATCCTGACTCATGGTATAACTAATAATAAATGCTCGTTGGAAACGT	0.797503	0.0302156	0.042248
29352	A_73_P328301	TMEM93	NM_001078035	ref|Bos taurus transmembrane protein 93 (TMEM93), mRNA [NM_001078035]	CGCTGCTTGTTCTGTAAAGTTATAAATAATTTATATCTGAAGACGAAGAGCCTGTACAGT	0.796199	0.0319164	0.0464265
46386	A_73_P360411	TEX264	NM_001038169	PREDICTED: Bos taurus testis expressed 264 (TEX264), transcript variant X6, mRNA	AGAAATAAAGAGGCTTGTGGCTTCAGTCATCCTTTGTAGCTCCCTTCTAGGTCACTGTGT	0.795617	0.0299284	0.0483231
27673	A_73_106545	GABRD	NM_001081715	ref|Bos taurus gamma-aminobutyric acid (GABA) A receptor, delta (GABRD), mRNA [NM_001081715]	GGAAGGGCATTCCCGGGCATTGGGTCCCAGCATGAAATAAAACGGAGCCTTTGGCCATCA	0.794476	0.0318117	0.0290734
40616	A_73_100056	NUDT21	NM_001035331	ref|Bos taurus nudix (nucleoside diphosphate linked moiety X)-type motif 21 (NUDT21), mRNA [NM_001035331]	TTTTGATGTTATCTCTTTCCCAGTCCTGAAATTAGCACCTGCTTTCTATTGTCTGAATAG	0.791473	0.0194841	0.0373912
26819	A_73_P051751	SCAND1	NM_001079591	ref|Bos taurus SCAN domain containing 1 (SCAND1), mRNA [NM_001079591]	TGTTTATTTTCCCGAACCTATTTCCACCCTCTATGGTTAGTTGTGAAACCAATTGGGGGG	0.790499	0.02656	0.0393665
23057	A_73_105885	OSBPL5	TC432822	PREDICTED: Bos taurus oxysterol binding protein like 5 (OSBPL5), transcript variant X3, mRNA	ACGATCTTCCCTTCACACACGTTTTTAATAAACGCAATTGCAATATTTTAGGCAGGCTGC	0.790386	0.0223425	0.0315761
3238	A_73_P032766	MMACHC	NM_001015588	ref|Bos taurus methylmalonic aciduria (cobalamin deficiency) cblC type, with homocystinuria (MMACHC), mRNA [NM_001015588]	CTAAATAATAGTACCTGCTTCAGAGGGTTATCATGGTGACTGAATAAATGTGAAATTGCT	0.787424	0.0258208	0.0418598
831	CUST_17_PI427023673	HIF1AN	ENSBTAG00000000092	hypoxia inducible factor 1 alpha subunit inhibitor [Source:HGNC Symbol;Acc:HGNC:17113]	AAAGCCCATCAGAAAGTGGCCATAATGAGAAACATTGAGAAGATGCTTGGAGAGGCCTTG	0.784551	0.0217141	0.0464466
48341	CUST_1260_PI427023673	ARMC10	ENSBTAG00000014161	armadillo repeat containing 10 [Source:HGNC Symbol;Acc:HGNC:21706]	GGTTTGTGTTGGACCATTTTATTGATACCAAATGAATATGAGAGCTTGTTCTGAAACTGT	0.784249	0.0201473	0.042357
40376	A_73_P078241	DCX	NM_001206965	ref|Bos taurus neuronal migration protein doublecortin (DCX), mRNA [NM_001206965]	TCAGGATGACTTTTCTCTGGATGAAAATGAATGCCGAGTCATGAAGGGAAACCCATCAGC	0.782722	0.0243574	0.0381547
43311	CUST_1375_PI427023673	WDR53	ENSBTAG00000014660	WD repeat domain 53 [Source:HGNC Symbol;Acc:HGNC:28786]	GGTACCGAAATATATTGGTAGCTGATCAAACTAGTTGTATATCAGTGTATCCCTTAAAAG	0.781862	0.0223221	0.0442134
17135	A_73_104909	SRD5A1	NM_001099137	ref|Bos taurus steroid-5-alpha-reductase, alpha polypeptide 1 (3-oxo-5 alpha-steroid delta 4-dehydrogenase alpha 1) (SRD5A1), mRNA [NM_001099137]	CTTCGTCTGCCTGTCTTCCAATTGCTAGACACTAACGTAGCACGTTATGACAGTTCGTTA	0.781142	0.0219206	0.0394536
40068	A_73_107930	ABHD11	NM_001034372	ref|Bos taurus abhydrolase domain containing 11 (ABHD11), nuclear gene encoding mitochondrial protein, mRNA [NM_001034372]	TGGGCACTCCAAGGGCATGAGGATTCAGAAGGGGTCAGACCTCAAACTTTAATGAATAAA	0.777798	0.0150713	0.0490104
34796	CUST_119_PI427023673	PDF	ENSBTAG00000001663	peptide deformylase (mitochondrial) [Source:HGNC Symbol;Acc:HGNC:30012]	TAAATAGCCACTCTCAGTAGACGTGATTTCAGAAGAGTGTAGCCATCTATTCCCCAAGCC	0.775207	0.0207114	0.0337769
48833	CUST_1150_PI427023673	ARID3B	ENSBTAG00000011828	AT-rich interaction domain 3B [Source:HGNC Symbol;Acc:HGNC:14350]	ACCACTTACGCAGGTGTGCTGTTTGCCCAGAAACCTGCAGTCCACCTCATCACAGGATCC	0.774848	0.0257312	0.0430258
40228	A_73_P182932	SMC1B	ENSBTAT00000014005	PREDICTED: Bos taurus structural maintenance of chromosomes 1B (SMC1B), transcript variant X4, mRNA	ACAAGTTTCAGGAGTCCATAGACGCTTTTGAGGCCAGCAGAAAGGAAGCCAGAATATGTA	0.774811	0.0174688	0.0251386
29033	A_73_P307856	THAP7	NM_001098465	ref|Bos taurus THAP domain containing 7 (THAP7), mRNA [NM_001098465]	TCCCACCATATTTGAGTCTTTCTCGAAGTTGCGCCGGACCAGGACCAAGGGGCACGGTTA	0.774261	0.0166421	0.0428557
28053	A_73_P273161	SALL2	NM_001102112	ref|Bos taurus sal-like 2 (Drosophila) (SALL2), mRNA [NM_001102112]	ATAGTAAAATGTGAAGACCAGACAAGGGAGATATTAGTGTCTTTCCCTTTTCATTAAAGG	0.773843	0.0203615	0.0463723
36311	A_73_110618	SIVA1	NM_001193178	ref|Bos taurus SIVA1, apoptosis-inducing factor (SIVA1), mRNA [NM_001193178]	GAGGGTGCCTTTTCTCTTTTGTATTTTGTGCTCCTGACGACTGAAGACAATAAATCCTCT	0.773688	0.0153952	0.0391219
4919	A_73_P064661	MGC133568	ENSBTAT00000049229	Bos taurus hypothetical protein MGC133568, mRNA (cDNA clone MGC:133568 IMAGE:8057427), complete cds	TCTCTCAAAAAGTTCTCTACCATCCCTAGAATCTGTAGATAAAGTGGCTGATGGTAAACT	0.773005	0.0220921	0.040042
26199	CUST_2497_PI427023673	LOC510860	ENSBTAG00000039196	Bos taurus C4b-binding protein alpha-like (LOC510860), mRNA	TGTGGAGTTATTGATGATTTTCTGACTCATGTTTTCCCTTTTCTGGACACAGAATACACA	0.772494	0.0209559	0.0448278
19599	CUST_695_PI427023673	EMC4	ENSBTAG00000006416	ER membrane protein complex subunit 4 [Source:HGNC Symbol;Acc:HGNC:28032]	CATGACTATGTAAACAAAAGAATGGTTGTTGTTAAATCAAGAACCACAGCAGCATCTCCT	0.772024	0.0184043	0.0452296
3858	A_73_P386066	CFH	NM_001033936	ref|Bos taurus complement factor H (CFH), mRNA [NM_001033936]	ACTGTAAGAGTTCGCTGCCATGAAGGCTACAGTCTTCAAAACGATCAGAACACAATGACC	0.770753	0.0185207	0.0439799
34652	A_73_P071931	SRM	ENSBTAT00000006978	gb|PREDICTED: Bos taurus spermidine synthase-like, transcript variant 1 (SRM), mRNA [XM_582280]	TTTGAGTTCATGAAACAGAACCAGGACGCCTTTGACGTCATCATCACTGACTCCTCAGAT	0.768095	0.0218141	0.0412886
33810	A_73_P072595	KIFC2	NM_001206788	ref|Bos taurus kinesin family member C2 (KIFC2), mRNA [NM_001206788]	ACAGTGTCTGCATTTTCACCTACGGTCAGACAGGGACGGGGAAGACCTACAGCATGGAGG	0.766878	0.0123411	0.0469885
211	A_73_120430	MYL12B	NM_001083764	ref|Bos taurus myosin, light chain 12B, regulatory (MYL12B), mRNA [NM_001083764]	CGAAAGACAAAGATGACTGAAGGAACTTGAGCTAAAACTTTCCAGTTACTTTGTCTTACT	0.765439	0.0157035	0.0370603
34850	A_73_P034331	TMEM261	NM_001077007	Bos taurus transmembrane protein 261 (TMEM261), mRNA	ATTCATGGTCAATGACTGTTTATGGCATTCTTCGCAGGCTCCACAGGGACCAATAAATCC	0.765309	0.0143302	0.0258241
43654	CUST_765_PI427023673	ACMSD	ENSBTAG00000008039	aminocarboxymuconate semialdehyde decarboxylase [Source:HGNC Symbol;Acc:HGNC:19288]	CATATTTTACCAAGAGAATGGCCAGACCTAAAAAAGAGATTCGGTTATGGAGGCTGGGTG	0.764214	0.0148052	0.0265351
47573	A_73_103367	SLC1A4	NM_001081577	ref|Bos taurus solute carrier family 1 (glutamate/neutral amino acid transporter), member 4 (SLC1A4), mRNA [NM_001081577]	GCTGTTCATCTCTTTTCAATATGTGACACTTGCCTTAAAACATAGCAGTCTTCAAAATGA	0.763051	0.0155354	0.0314697
43116	A_73_P203637	TTC38	NM_001105259	ref|Bos taurus tetratricopeptide repeat domain 38 (TTC38), mRNA [NM_001105259]	TGTCTTCAACCAGTTACTGATTCACGCGGCCTTGAACTGCTCGTCCGGCCTCCACAAGCA	0.762775	0.0157841	0.0410547
48078	A_73_100387	CCDC94	NM_001075691	ref|Bos taurus coiled-coil domain containing 94 (CCDC94), mRNA [NM_001075691]	GAGGAATCAAGGAAAAGAAGACTCCTTGAAGACTCTGACTCAGAGGAGGACACCAGCCCC	0.76209	0.0180026	0.0489857
1489	A_73_P044856	FETUB	NM_001034218	ref|Bos taurus fetuin B (FETUB), mRNA [NM_001034218]	GTGGTGGGGAAAAGGGGACAGAGAAATAGTTCAAACAGTCTAATAAAGTAAGTTTTTTGG	0.761865	0.0142015	0.0209802
40200	CUST_2186_PI427023673	ADGRB1	ENSBTAG00000026340	Adhesion G protein-coupled receptor B1, transcript variant X1	CCGTAAATTCTACAAGCACTTCTCCGAAGACGTCACTGAACTGTCCCAGTATGTGATGAT	0.761508	0.0179666	0.0474367
21243	A_73_P075517	CNGA4	ENSBTAT00000006887	ref|PREDICTED: Bos taurus cyclic nucleotide gated channel alpha 3-like (CNGA4), mRNA [XM_002693174]	TGTTATGGAGGAAAAGGGCCGTGAGATCCTGCTCAAAATGAACAAGTTGGATGTAAACGC	0.760169	0.0110507	0.0175958
36501	A_73_P276312	LOC784457	TC411552	PREDICTED: Bos taurus proline-rich transmembrane protein 1 (LOC784457), mRNA	ACTTGTGCAACACACGGCTGAAGTGTAAAATGCGGGAGTATTCATGGGTTGTGCAATTAA	0.760013	0.0131199	0.0182007
40066	A_73_P400021	PTPN18	NM_001078069	ref|Bos taurus protein tyrosine phosphatase, non-receptor type 18 (brain-derived) (PTPN18), mRNA [NM_001078069]	AAGCTTTAACCTGCGCATTGGGAGGCCTAAAGGACCCCGAGATCCGTCTGCTGAATGGAC	0.759928	0.014809	0.0375189
5169	A_73_P060516	LOC534506	ENSBTAT00000004287	ens|PREDICTED: Bos taurus misc_RNA (LOC534506), miscRNA. [Source:RefSeq DNA;Acc:XR_042714] [ENSBTAT00000004287]	AGGGCCAGGATACACACTACACATTCAGTTTCACAATCCTCTGTTCAGGTCACTAAACCT	0.758225	0.013868	0.0318335
45435	A_73_P101391	CACNA1D	NM_001193025	ref|Bos taurus calcium channel, voltage-dependent, L type, alpha 1D subunit (CACNA1D), mRNA [NM_001193025]	ATCAGTTTTTATATGCTCTGCGCATTTCTGATCATCAACCTCTTTGTAGCAGTCATCATG	0.756948	0.0166357	0.0414115
44565	CUST_274_PI427023673	RAB11B	ENSBTAG00000002475	RAB11B, member RAS oncogene family [Source:HGNC Symbol;Acc:HGNC:9761]	CCGCTCTTGTAGCCTTTGGTTTTTTGTTATTGTAGAGAAACACAGATTCTTTATACACTT	0.756198	0.0175795	0.0425681
36126	A_73_105677	TC477196	TC477196	tc|Rep: Uncharacterized small conserved protein, homolog of yfjA/yukE B.subtilis - Clostridium acetobutylicum, partial (12%) [TC477196]	TCTGCATCATCCCTTATTTTGCCACTGTAGAATAATTCAAGAATCCTTTGTCAATTTGTC	0.756185	0.0136926	0.0292913
23946	A_73_P313861	NOTCH4	NM_001206948	ref|Bos taurus Notch homolog 4 (NOTCH4), mRNA [NM_001206948]	CACCACTATCTCTAAGAACACCAAGTCTGTCACCCCATAATAAAGATGATTTGAAGTGTT	0.756119	0.0108131	0.0179395
38766	A_73_P145691	DN284051	DN284051	gb|1184301 MARC 7BOV Bos taurus cDNA 5', mRNA sequence [DN284051]	TTGAAGCCCCACAGTTCAACATCCTAAAGTGAGACAGCAATAAAAATTAGCCTGGAAAAA	0.755368	0.0148345	0.0411196
11082	A_73_P060446	CACUL1	ENSBTAT00000030962	PREDICTED: Bos taurus CDK2-associated, cullin domain 1 (CACUL1), transcript variant X2, mRNA	CACCAAGCTGTTCTTGGAAGAGGATGCTGGACTTCTTGCTTTGGTTTGTAATTTAAAAAA	0.755131	0.0151405	0.0463758
152	A_73_P134921	PHF21A	A_73_P134921	PHD finger protein 21A, transcript variant X14	TTTCCACTCCGTCATCCTAGGTGACTAGCACAACAGCTTACATCTGAACTTGAGAGGAAT	0.754628	0.0142417	0.0248138
29028	CUST_1896_PI427023673	CST6	ENSBTAG00000014718	Bos taurus cystatin E/M (CST6), mRNA	CAACATGGGCAGCAACAGCGACTACTACTACCGCGACATCACCATCCTCCGGGCGCACAG	0.752528	0.0119653	0.034724
28339	A_73_P040026	ZMYND10	NM_001040548	ref|Bos taurus zinc finger, MYND-type containing 10 (ZMYND10), mRNA [NM_001040548]	TGCAGGAGCTGCAGAAGCAGGCAGAGCTGATGGAATTTGAGATTGCGCTGAAGGCCCTCT	0.752234	0.0152169	0.0429614
39990	A_73_P062991	ECI2	NM_001034242	ref|Bos taurus enoyl-CoA delta isomerase 2 (ECI2), mRNA [NM_001034242]	TGAGAATTTCCAAGCAGATCATCAGAAACAGGGAGAAAGAAAAGTTGCACGCGGTCAACG	0.750806	0.0115833	0.0464072
28616	A_73_P034806	TACC2	ENSBTAT00000014288	PREDICTED: Bos taurus transforming acidic coiled-coil containing protein 2 (TACC2), transcript variant X24, mRNA	ACTGATTGCCAAAATGGGGAAAAGCTAACTCTGAACCAAATGTTTGGACTTGACCGTTGC	0.750794	0.0139282	0.0432062
11687	A_73_P034122	NRXN1	NM_174404	ref|Bos taurus neurexin 1 (NRXN1), mRNA [NM_174404]	ACAACACAAAAACAACACAAAACACAACACAGAAAAAGAAGCTACCTATGATCCCAGATT	0.750695	0.0144691	0.0284559
49043	A_73_116710	TC436181	TC436181	tc|Rep: Elongation of very long chain fatty acids protein 5 - Bos taurus (Bovine), partial (48%) [TC436181]	TTAATCATTAAAACGTTTTTGATTACCAAAAACAACTGCATAAACCTGCTGAACCCGAGC	0.750268	0.0153792	0.0363024
51496	A_73_109996	MYL6B	NM_001075713	ref|Bos taurus myosin, light chain 6B, alkali, smooth muscle and non-muscle (MYL6B), mRNA [NM_001075713]	CACCAGGCAAAAGCACGTTCCTGCCACTAGGAGGCTATTGTTTCAAAATAAAGAGACGTT	0.749615	0.0139472	0.0310981
2969	A_73_P041811	SRR	NM_001077965	ref|Bos taurus serine racemase (SRR), mRNA [NM_001077965]	GGGTGAAGAAGCAGGATGAAAAGGCAGCTCCTTAGCAATCTGTTTCTGTTTAATATGTGC	0.748816	0.0102252	0.040873
9584	CUST_588_PI427023673	ATXN10	ENSBTAG00000009351	Bos taurus ataxin 10 (ATXN10), mRNA	TTGATTCTTTGCTTTAAAAAATGTAGCTGTCTGGTTTGCTTCTTTCCCTGTGGAATACAG	0.748739	0.0130041	0.0471202
32135	CUST_2335_PI427023673	NFYC	ENSBTAG00000021943	nuclear transcription factor Y subunit gamma [Source:HGNC Symbol;Acc:HGNC:7806]	GGGGCCGAGATTCTCCAACAGAAAGATGCAATATTTTTTATTTCCTTCTTTCTCATTTTT	0.74832	0.0146295	0.0434514
28892	A_73_P362371	ZSCAN12	NM_001077138	ref|Bos taurus zinc finger and SCAN domain containing 12 (ZSCAN12), mRNA [NM_001077138]	CAAATGTGATGTATGTGGAAAAGCCTCTTATTCAGAGGACAAGTCTTATAGAACATCAAC	0.747804	0.0110425	0.0111463
7425	A_73_P058396	POLR3E	ENSBTAT00000045908	PREDICTED: Bos taurus polymerase (RNA) III (DNA directed) polypeptide E (80kD) (POLR3E), transcript variant X6, mRNA	CCGGCAGGATGATGAAAATCATGGTCTAATATTTTACTTTCAAACTTAATGCCAACAAGA	0.746523	0.0131309	0.0309005
27928	A_73_P395086	MON2	ENSBTAT00000014698	tc|Rep: Uncharacterized protein MON2 - Homo sapiens (Human), partial (35%) [TC453780]	TTCAACACCAGAAGATATTTACTTCACCCTTTAGGAGATTTTTCAAGAGCATGGGATGTT	0.745775	0.0120791	0.0224676
10645	A_73_P143206	DN285266	DN285266	gb|1235103 MARC 7BOV Bos taurus cDNA 3', mRNA sequence [DN285266]	CTCCTCAAAACACCAATTTCCATGATATACAAATAAGAGGAATTGTGTGGTAAACCTAGG	0.745408	0.0112077	0.0373555
20584	A_73_118497	FMC1	NM_001076997	Bos taurus formation of mitochondrial complex V assembly factor 1 homolog (FMC1), mRNA	GCTGGGAGCCATGAAAATGGAGAAATTCCTTGGATGCTGTCTTCATGCAAGAGTTCACTA	0.743144	0.00971288	0.0184067
36046	CUST_815_PI427023673	MRPS35	ENSBTAG00000006369	mitochondrial ribosomal protein S35 [Source:HGNC Symbol;Acc:HGNC:16635]	AGGGGGACAATGAGAATACCATTTCTCAGTACAAAGAATCAGTGAAGAGACTATTACATT	0.742887	0.00796934	0.0207087
42669	A_73_P066601	LOC526163	ENSBTAT00000010967	gb|PREDICTED: Bos taurus CD300C antigen-like (LOC526163), miscRNA [XR_083992]	TCATAAACAATACCAAATACTGGTGCAAACCCCCATGTGTGTTATCGTGGAGGATGGTGG	0.742393	0.0126111	0.0398339
33516	A_73_P346036	TTC5	NM_001075464	ref|Bos taurus tetratricopeptide repeat domain 5 (TTC5), mRNA [NM_001075464]	TTCTGTGTTTTGGCAAAGAGTGTGGAATTGGTAGAAGGGTTGGGACCTTGTCACAGGATA	0.741038	0.010633	0.0394371
1611	CUST_2569_PI427023673	RYBP	ENSBTAG00000022689	RING1 and YY1 binding protein [Source:HGNC Symbol;Acc:HGNC:10480]	AGTATACAGTCTGCAAATGCTACAACAAAGACCAGTGAAACGAATCACACCTCAAGGCCC	0.74052	0.0132376	0.028557
18300	A_73_P512963	AKR1B1	NM_001012519	ref|Bos taurus aldo-keto reductase family 1, member B1 (aldose reductase) (AKR1B1), mRNA [NM_001012519]	GAACTGTAATCCTTTCAGCTAGGCTTTTCTTTGCCTCAAATAAAAATGCTCTTATGAGTT	0.739009	0.0127981	0.0381173
20278	A_73_P030661	TEX29	NM_001076461	Bos taurus testis expressed 29 (TEX29), mRNA	GGCCGAAATATTTTGTAGAGTGACCACCGGTGAGAGAAAATAAAGGTATTTTGAAATGCT	0.738646	0.0126191	0.0322659
42491	A_73_P043546	ZCCHC17	NM_001034652	ref|Bos taurus zinc finger, CCHC domain containing 17 (ZCCHC17), mRNA [NM_001034652]	TTGTATTTACTACAGTGTGAGTCAATTGGTTCCATTTCAGGTTTCTGCTTAAATTCCTGG	0.738303	0.0130264	0.047259
53427	A_73_118965	GALNT2	TC441416	PREDICTED: Bos indicus polypeptide N-acetylgalactosaminyltransferase 2 (GALNT2), mRNA	ACTGCTGTACAGAGCTTGTACTTTGTCCATTTTATAGATGGAAACCATCCTTGAAAATTG	0.738147	0.00945174	0.0078788
47770	A_73_P066111	IMP5	ENSBTAT00000013625	tc|GB|XM_591677.2|XP_591677.2 similar to Intramembrane protease 5 [NP9568390]	TATTGTCACCGCTTTGATGTGCAGATCCACTCGCGGCAGGTCTACTTCGTGGCCTGCACA	0.737527	0.00964587	0.0435935
11953	A_73_P032466	CORO2A	NM_001038220	ref|Bos taurus coronin, actin binding protein, 2A (CORO2A), mRNA [NM_001038220]	GGAAGTCAGAAATTGAGCTATGCTTTTAATACAAAACCGTGCCTGAAATCCTTTGATTAT	0.736401	0.0112347	0.0345849
28751	CUST_116_PI427023673	LOC522763	ENSBTAG00000001308	PREDICTED: Bos taurus uncharacterized LOC522763 (LOC522763), transcript variant X1, mRNA	ATACGTGTGTTTTTCTATGTCCGTTGCTTTTTGATGTTGCTTCCTGCTTCTCTGGGACTC	0.735915	0.00974905	0.0395563
32691	CUST_2159_PI427023673	C2orf80	ENSBTAG00000012888	chromosome 2 open reading frame 80 [Source:HGNC Symbol;Acc:HGNC:34352]	CACACAGCTGAAGGACAAAGTCACTTAGAAACTTGGAATTGCACCACGGGAGTTCATAAT	0.733975	0.00641301	0.00948077
521	A_73_115565	FAM120B	NM_001102507	ref|Bos taurus family with sequence similarity 120B (FAM120B), mRNA [NM_001102507]	TTTGGTGGTGGTATATTATCTCTGCAGTTAAGTCTTCTGATGAAGGTTCCATATATCAGT	0.73314	0.00954629	0.0204908
53041	A_73_P124311	CB171863	CB171863	gb|OIJ603163072.R1 CSEQFN46 thyroid and parathyroid Bos taurus cDNA, mRNA sequence [CB171863]	AGACTCCATGTATACGCCATCGGTAACCAGTATGTAAAACTAGCAAGGATCAAATAACCC	0.733105	0.00910633	0.0499582
38245	CUST_2393_PI427023673	ATOH8	ENSBTAG00000024000	atonal bHLH transcription factor 8 [Source:HGNC Symbol;Acc:HGNC:24126]	ACATCTGTGCTCAACCATCTGCTTCAAATTGAAGTAAAAGCCCCAATGTGTAAAGAAAAC	0.732581	0.0103792	0.0108207
27100	A_73_P090311	DNAJC22	NM_001075701	ref|Bos taurus DnaJ (Hsp40) homolog, subfamily C, member 22 (DNAJC22), mRNA [NM_001075701]	TAAGGTTTTTGGTCTCTCAGAGGGGGCAACAAATGAAGAAATACATGGCAGATACCGGGA	0.730705	0.00974596	0.0351379
47333	A_73_P093811	TMEM35B	ENSBTAT00000029261	PREDICTED: Bos taurus transmembrane protein 35B (TMEM35B), mRNA	TAGCGTTCCTCATGTCATGTGAAAGTAAATTTAAATGACCCAAACTTTTAATGCCCCCAA	0.730638	0.00910706	0.0230788
27763	A_73_P030701	RPL38	NM_001113309	ref|Bos taurus ribosomal protein L38 (RPL38), mRNA [NM_001113309]	GGTGAAGGAGCTGAAATGAACCACGCATGCTGCTTTGAACTGTATTAAAATTTTTAAAAT	0.730194	0.00784235	0.0131817
52558	CUST_1707_PI427023673	ZNF362	ENSBTAG00000012629	zinc finger protein 362 [Source:HGNC Symbol;Acc:HGNC:18079]	TGGGACCTCCAGGCCACCGTATTTAGAACTAGTTACCTTATTAAAAAAGAGAAAACAGTC	0.730133	0.0155083	0.0419297
40459	A_73_105446	ZNF133	NM_001110090	ref|Bos taurus zinc finger protein 133 (ZNF133), mRNA [NM_001110090]	AGCGCAGACTAAATCAAAACATTTTACGGTCTTCTTGAAAACGCATTCCCTAAGCGGTCA	0.728874	0.0107131	0.0372565
13349	A_73_P404139	TOB1	NM_001077075	ref|Bos taurus transducer of ERBB2, 1 (TOB1), mRNA [NM_001077075]	AATTTGTTTTTCTGCCACAAACTGAACTTTTTTGTGTGTGTCTAGGGGGGAATTGAAACA	0.725643	0.0109808	0.048237
44414	A_73_101296	TRIM32	NM_001075824	ref|Bos taurus tripartite motif containing 32 (TRIM32), mRNA [NM_001075824]	CTGTTGGGTCCTCATTGTGCATTTTCCCCAAGTGAGTGCATAATTTTTGGTTGTGGGATT	0.724122	0.0079114	0.0291796
38830	A_73_P049996	CCDC96	NM_001103314	ref|Bos taurus coiled-coil domain containing 96 (CCDC96), mRNA [NM_001103314]	GCTCGTGAGACTATCACAGTAACTTTTGTCTTTTGATGACATTTTGTTTTCTAAAGTGCT	0.721649	0.00836493	0.044995
33812	A_73_P034206	CCDC37	NM_001076866	ref|Bos taurus coiled-coil domain containing 37 (CCDC37), mRNA [NM_001076866]	GACTCAACTGAAATAAAAGCTGTGTCGCTTGGGTACTGTGTCTTGGGAGGCAGACACAGT	0.720291	0.00813489	0.00903748
51842	A_73_113755	DNAH7	NM_001143874	ref|Bos taurus dynein, axonemal, heavy chain 7 (DNAH7), mRNA [NM_001143874]	CAAGGAACACTGGATTGGACGGGGTGTAGCGCTGCTGTGTCAACTTAATTCATAATTAGA	0.719481	0.00704498	0.0375985
32101	A_73_P084966	OR2M5	ENSBTAT00000012496	tc|GB|XM_592528.1|XP_592528.1 similar to olfactory receptor, family 2, subfamily M, member 2 [NP9568631]	GTGGGAACGTACTATGGAGCAGTTTTGTTTATGTACATGCGGCCTGCTTCTAATCATTCC	0.7194	0.00619325	0.0197225
53439	CUST_161_PI427023673	CPSF4	ENSBTAG00000002090	cleavage and polyadenylation specific factor 4 [Source:HGNC Symbol;Acc:HGNC:2327]	ATTTTGCTGTAATGTCTTTTTTAAAAGGGGGACACGTGTTCCAGTCTGGCCCCTTGGGTT	0.719265	0.00687672	0.0251402
53686	A_73_P040841	DUSP14	NM_001075308	ref|Bos taurus dual specificity phosphatase 14 (DUSP14), mRNA [NM_001075308]	CCTCTTGGAATCAGTGTGCCCCAGAAGTATATTAGCATTATTTTTAATAAATACATCTGC	0.719197	0.00987032	0.0292669
39287	A_73_104563	NMT2	NM_174456	ref|Bos taurus N-myristoyltransferase 2 (NMT2), mRNA [NM_174456]	GTGACTCAAAAATTACAGGAAATTCAGATGTCAGCATCCATAAATAAAGTGTGGAACATG	0.718683	0.00899619	0.0475782
16299	A_73_116573	GSTM3	NM_001046560	ref|Bos taurus glutathione S-transferase mu 3 (brain) (GSTM3), mRNA [NM_001046560]	TTGTTCCATTCCGTCCCTAGGGTACTTGTACTCCCTCTTTCCTGCTCTTTTCAATAAATA	0.7152	0.0124498	0.0465866
31854	A_73_P034366	ING5	NM_001040580	ref|Bos taurus inhibitor of growth family, member 5 (ING5), mRNA [NM_001040580]	GCGCGTTAGCGTGTTCCCTCATTCATGTTGCAATATTTTACATTTATTTTAAAACTACCT	0.714975	0.00835045	0.0118677
15114	A_73_P074641	LOC618696	ENSBTAT00000054119	Trophoblast Kunitz domain protein 1-like, transcript variant X2	TTTGATAACCACACGCCAGAGGAATTGCCAACACTCGAGATTGAATACTCAACACTCAGT	0.713403	0.00904191	0.0311526
47653	CUST_2241_PI427023673	ACTL6A	ENSBTAG00000002460	actin like 6A [Source:HGNC Symbol;Acc:HGNC:24124]	CTTTCAGTAAAATGCTTTCCAACTCTGTTTAGTATATTACCAGTGGATTGGTAGAATTGC	0.712712	0.0112779	0.0469668
31191	A_73_P285591	CYP4F2	NM_001075322	ref|Bos taurus cytochrome P450, family 4, subfamily F, polypeptide 2 (CYP4F2), mRNA [NM_001075322]	ACTTCAACATCTTGAAGCCCTATATCAAGATTTTCACCAAGAGTGCAGAGATCATGCACG	0.712258	0.00757361	0.00842585
34780	A_73_119681	KIAA1549L	EH200646	gb|LB01844.CR_N21 GC_BGC-18 Bos taurus cDNA clone IMAGE:8832407 5', mRNA sequence [EH200646]	CCCAAACCAGTCTCTTGTTCGGATGATATTAGGTAGCGTCCTTTTGGTATGCTGGTTGAT	0.711181	0.00833632	0.0477617
37268	A_73_P257136	SCG5	NM_001045998	ref|Bos taurus secretogranin V (7B2 protein) (SCG5), mRNA [NM_001045998]	TAAAGTGAAGACTCAGTGTGGAATTCATGTGACCTGCTATCCCTCCTTGGTACTGCTTCT	0.711012	0.00702935	0.0178518
30549	A_73_P062261	LY6G6D	ENSBTAT00000053636	PREDICTED: Bos taurus lymphocyte antigen 6 complex, locus G6D (LY6G6D), mRNA	AGACGTAACTTATACGACCCACAGGGACTGCTGCGTTGGCGACCTGTGCAACAGTGCTGT	0.710755	0.00682133	0.0361276
159	CUST_1837_PI427023673	C2orf68	ENSBTAG00000018291	chromosome 2 open reading frame 68 [Source:HGNC Symbol;Acc:HGNC:34353]	CTGTTTTCTCATTTCCAATGTTCCTGCTGTGTGGATGAATAAAATGACATGTTGCAAATT	0.710324	0.0079516	0.0431396
26177	A_73_P030121	PANX2	NM_001102225	ref|Bos taurus pannexin 2 (PANX2), mRNA [NM_001102225]	ACGGTGACATCGTGACAGTGTTAACAAGGTACCCAGCATATCAATAAAGATTATTCTGAT	0.709102	0.00796966	0.0375284
50197	A_73_P423416	CATHL2	NM_174826	ref|Bos taurus cathelicidin 2 (CATHL2), mRNA [NM_174826]	AGGGAAGACCTCTTGGGATCTCTTTTGCCCTGAGTCAGCATCCAAAAAATAAAATCTTGG	0.70896	0.00939339	0.0455268
31425	A_73_P267566	NME1	NM_205818	ref|Bos taurus non-metastatic cells 1, protein (NM23A) expressed in (NME1), transcript variant 1, mRNA [NM_205818]	TCTTGGAGCTGTGGGTGCTCCATGTACAGTATTAAATGCTATCATCAGATTAAAATGTTC	0.707695	0.0079603	0.0457157
48891	A_73_103208	ULK2	TC409105	PREDICTED: Bos taurus unc-51 like autophagy activating kinase 2 (ULK2), transcript variant X8, mRNA	GTATGTGTGAAACCCTGCAGTCTGAACAGCAGAAAACAAACTGTAAATGCAGGAATAATG	0.707562	0.00702501	0.00500617
3856	A_73_107437	SLIT3	NM_001191450	ref|Bos taurus slit homolog 3 (Drosophila) (SLIT3), mRNA [NM_001191450]	TCCTCCTCAATGCCAACAAGATCAACTGCCTGCGGGTGAACACGTTCCAGGACCTGCAGA	0.707027	0.00879876	0.0406507
37030	A_73_P164557	STARD10	NM_001192379	ref|Bos taurus StAR-related lipid transfer (START) domain containing 10 (STARD10), mRNA [NM_001192379]	AAACTTTCGACATTGCTCGCTTGACAGTCAACGCTGATGTGGGCTATTATTCTTGGAGGT	0.705066	0.00949006	0.0491164
30728	A_73_110659	FAM117A	NM_001101070	ref|Bos taurus family with sequence similarity 117, member A (FAM117A), mRNA [NM_001101070]	CTTACACAAAATTGAAGAAGAATGTTAATGTTCAAGTTTTATTATCCTGTGTTTAGAAGG	0.704159	0.00697718	0.0189865
25663	A_73_P114561	RGS6	ENSBTAT00000018891	ens|regulator of G-protein signaling 6 [Source:HGNC Symbol;Acc:10002] [ENSBTAT00000018891]	ACTCGCAGTGTGGTAAGTTCAGCTGGTTTTCTTTGGTTTTTTGGCTTTCTTTCCGTTTTT	0.702329	0.00639304	0.0209267
203	A_73_P342081	CCDC92	NM_001101243	ref|Bos taurus coiled-coil domain containing 92 (CCDC92), mRNA [NM_001101243]	ATAAACCGAGCAGATGTATGTTATGTCACAGGAACTAAATAAGATGACATTACTCCTCAT	0.701713	0.00999999	0.0494485
36945	A_73_102001	ID3	NM_001014950	ref|Bos taurus inhibitor of DNA binding 3, dominant negative helix-loop-helix protein (ID3), mRNA [NM_001014950]	ATGCGATGTATATTAAACTTTTTATAAAAGTTAACATTTTGCATAATAAACGGTTTTTAA	0.701143	0.00645043	0.0281848
1101	CUST_1798_PI427023673	CSTB	ENSBTAG00000018189	Bos taurus cystatin B (stefin B) (CSTB), mRNA	AAATTTCCTTCGAGGGGAGCTTGAGTTATCTTTAAATAAACATGTGTTTTCTGTTTTCAC	0.700077	0.00632397	0.021349
18715	A_73_P036306	OOEP	NM_001077869	ref|Bos taurus oocyte expressed protein homolog (dog) (OOEP), mRNA [NM_001077869]	GCTTCAAACCTGAGTTTGTAGTGCCATTCTAGTTAATAAATTTCATTTTTGTCTGAAGGC	0.699549	0.00658103	0.0289913
30294	A_73_P149851	ALPK3	TC443116	PREDICTED: Bos taurus alpha kinase 3 (ALPK3), transcript variant X4, mRNA	CATGTTATGACTCTCACATGTGACCAAAAGCAAATTACTTTCTGCTTAGGGAGATCATTC	0.69935	0.00847406	0.0492697
20996	A_73_P056796	LOC529919	ENSBTAT00000037390	gb|PREDICTED: Bos taurus hypothetical LOC529919 (LOC529919), mRNA [XM_608381]	CGTAAATTCTACAAGCACTTCTCCGAAGACGTCACTGAACTGTCCCAGTATGTGATGATC	0.699056	0.0090005	0.018611
22681	CUST_1954_PI427023673	CARD10	ENSBTAG00000015044	caspase recruitment domain family member 10 [Source:HGNC Symbol;Acc:HGNC:16422]	TGCGTTCTCAGTCCTGTGCGTTGGTTTGCACACTCAAGATCCCACAGAGTGGACTCGAGT	0.696148	0.00737974	0.00638958
49587	A_73_113465	CCDC141	NM_001242308	ref|Bos taurus coiled-coil domain containing 141 (CCDC141), mRNA [NM_001242308]	GGCGGTGAAGCATGAGGAATTACACAGAGAAATTAAAGACTGCACAGCTGATGCTTTGCA	0.693586	0.00611612	0.026479
20891	A_73_P079166	TRD@	ENSBTAT00000052114	Bos taurus T-cell receptor delta chain, mRNA (cDNA clone IMAGE:7948970), partial cds	GGGGGCCCAACTGTTTTATATGCTGCTTTATAAAGGGATAAGAGATATGAAGATATATAG	0.69336	0.00610667	0.0479799
40065	A_73_P093931	FAM132B	ENSBTAT00000042641	PREDICTED: Bos taurus family with sequence similarity 132 member B (FAM132B), transcript variant X2, mRNA	TCTCTATCTGCAGGCCGGGCAGTACACCTCCGTCTTCTTGGACAATGCCAGTGGCTCCGC	0.692533	0.00493899	0.0307616
13273	A_73_P067221	CDH1	ENSBTAT00000053544	ens|Cadherin-1 Precursor (Epithelial cadherin)(E-cadherin)(CD324 antigen) [Contains E-Cad/CTF1;E-Cad/CTF2;E-Cad/CTF3] [Source:UniProtKB/Swiss-Prot;Acc:Q6R8F2] [ENSBTAT00000053544]	GTGCCGATAATTTTATATTTTCTTTGGGAGTGGAAAAGGAAAGCAATTCAAGCTGCAAAA	0.691732	0.00651666	0.036349
22835	A_73_P251656	CRISP2	NM_001038089	ref|Bos taurus cysteine-rich secretory protein 2 (CRISP2), mRNA [NM_001038089]	TGTGATTCCTTGAAGAAAACAGCTGGCTGTGAACACGAATTGCTCAAGGAAAAGTGCAAG	0.690217	0.00782962	0.0375528
48607	A_73_105883	GRTP1	NM_001103336	ref|Bos taurus growth hormone regulated TBC protein 1 (GRTP1), mRNA [NM_001103336]	AAACGTGAGGTGCGGGTCTGTGTTCATTACACCAGCTCCTGTGAGCCTGCCATCTAATGA	0.688601	0.00657748	0.0391368
21249	A_73_116263	FKBP1B	NM_001098158	ref|Bos taurus FK506 binding protein 1B, 12.6 kDa (FKBP1B), mRNA [NM_001098158]	CAGAAGTTCTGCTGACTTAAACAATGTCCTCTTTGAAACCGGTATGTAAAATAAAGGCTC	0.687607	0.00613122	0.0329356
3392	A_73_P123741	CB221878	CB221878	gb|1IL21B10 Bos taurus Ileum #1 library Bos taurus cDNA, mRNA sequence [CB221878]	AAGCAAACAGGATAGTGTGATAAATTACCCAACAGCTTCACCAAACTTTATGTTGACTGG	0.685409	0.00645955	0.0394386
47746	A_73_111644	KNOP1	NM_001166606	Bos taurus lysine rich nucleolar protein 1 (KNOP1), mRNA	AAGGCCTGTGTCAACTATTCCCTACACTGAATGTCCCCTCTAGGGAATTTCACCCAAAAT	0.685052	0.00815992	0.0299759
42601	A_73_109480	ORC3	NM_001038139	ref|Bos taurus origin recognition complex, subunit 3 (ORC3), mRNA [NM_001038139]	CCCAAACAGGAATGTATCAAAGCCCCTTTGGAGAATTTTGAAATCCAACAAGTAACACGC	0.681583	0.00514221	0.0219678
33426	A_73_115115	HIST1H2AA	NM_001205596	ref|Bos taurus histone H2A (HIST1H2AA), mRNA [NM_001205596]	GAAATAAATGGATTGGTGTCAGTGTTCTGATATCACTGATTGATCCTGCACGTGCAAAAT	0.680847	0.00402269	0.0308103
34089	CUST_811_PI427023673	POLR1D	ENSBTAG00000008642	Bos taurus polymerase (RNA) I polypeptide D (POLR1D), mRNA	AAAGACGTACGATGCCACTCTTAGGTGTTGTACAGTTGTTTCAGAAATCTGAATTTTAAA	0.680375	0.00403062	0.0446931
37011	A_73_P430506	XIST	NR_001464	ref|Bos taurus X (inactive)-specific transcript (XIST), non-coding RNA [NR_001464]	CGATTTCAGCCTTAAGTGACTAGTATGGAAATGTGTTTAGGGACTTATTTGTAGAATTCA	0.679667	0.00514638	0.0291729
34011	A_73_P303401	CXCL12	NM_001113174	ref|Bos taurus chemokine (C-X-C motif) ligand 12 (CXCL12), mRNA [NM_001113174]	TATAGTCAAACAGTTCCTATATTTGGAGTGGAGCCATATGAATGTCAGTAGGTTACATTT	0.679181	0.00479315	0.041552
22410	A_73_P278841	HEATR1	ENSBTAT00000032886	PREDICTED: Bos mutus HEAT repeat containing 1 (HEATR1), partial mRNA	CATGTCTTTATTCTGGGTGTTCAGGACCATATCACTTTTGGTGCCTTAACCCTGCTTGGA	0.677117	0.00770397	0.033583
45425	A_73_P104166	HSPBAP1	BC120165	gb|Bos taurus HSPB (heat shock 27kDa) associated protein 1, mRNA (cDNA clone IMAGE:8112780), complete cds. [BC120165]	GAAGACTTGTAACTGATTCTTTTTGCCTTACAGTCAGAGAAAGCAATTACCATTACTCTG	0.672767	0.00477506	0.0229566
7290	A_73_P204577	SLC45A3	TC469886	PREDICTED: Bos taurus solute carrier family 45 member 3 (SLC45A3), transcript variant X4, mRNA	CTGTATGTGAGCAATCAGAGTATAATGTTTATGGTGATGAAATTAAAGCCTACTCCTATG	0.665719	0.00681992	0.0338
51877	A_73_P370326	COL6A1	NM_001143865	ref|Bos taurus collagen, type VI, alpha 1 (COL6A1), mRNA [NM_001143865]	GTGTTTTTTCTCAACCGTGTTCATGTGGGCGACTTTTCCAAATAAAGGTTTTCACTCTCC	0.665332	0.00353825	0.00487968
20714	A_73_102834	POU6F2	NM_001102046	ref|Bos taurus POU class 6 homeobox 2 (POU6F2), mRNA [NM_001102046]	AGCACGAGCCGACCACGGCGGTCCCTTTGGAACCCTTAACAGACTCGCTGGAAGAAAATT	0.663065	0.00580068	0.0316016
45876	A_73_P366161	PARD6B	NM_001098104	Bos taurus par-6 family cell polarity regulator beta (PARD6B), mRNA	ATCAAGAAGAAGAATGTTCTAACCAATGTGTTGCGGCCCGACAACCACAGAAAAAAGCCG	0.6551	0.00339033	0.0355625
22479	A_73_P091466	LOC101907335	ENSBTAT00000028129	PREDICTED: Bos taurus antigen WC1.1-like (LOC101907335), mRNA	GCCTCAGATATTCTAATTGCCTGTATTTCAATAGAGTAATGCTGACCTGTAATTTTGTCA	0.654659	0.00524146	0.0330508
50651	CUST_1462_PI427023673	PTER	ENSBTAG00000016676	phosphotriesterase related [Source:HGNC Symbol;Acc:HGNC:9590]	GCTTCCTTTTGTTTTGTTTTCTTAATCCATCAGCAGCACTCCTTGAGAAAATTTAAACTG	0.652366	0.00583958	0.0371012
41241	A_73_P079171	LOC785752	ENSBTAT00000046304	Bos taurus T-cell receptor delta chain, mRNA (cDNA clone MGC:159602 IMAGE:8182494), complete cds	TGCTTAAATGGCTGCTCCCCAAACGGTTTTCCTTTAAAGACAACAAACCCAGCTTATCCT	0.650633	0.00443896	0.0499881
42189	CUST_1934_PI427023673	TMEM163	ENSBTAG00000018753	PREDICTED: Bos taurus transmembrane protein 163 (TMEM163), transcript variant X1, mRNA	GAACCATCGTGTAGATCACCTCCTAATTTCTATCCGTGTATTTCATTCGTTTCATACTGT	0.650599	0.00416938	0.0178136
39781	A_73_P253201	KIAA2013	NM_001045942	ref|Bos taurus KIAA2013 (KIAA2013), mRNA [NM_001045942]	TTGGGGGACACCAGTGACTCAGAAGTGCGTGTAGATGTTCAGGAGTTTGCATCGGGGAGG	0.648743	0.0054028	0.0306946
36484	A_73_P116016	OSBPL6	ENSBTAT00000019160	PREDICTED: Bos taurus oxysterol binding protein like 6 (OSBPL6), transcript variant X23, mRNA	AAACGGGAAACGTAGAGCTAGCCGACATATCACGCTCTGAATGAATAAATAACTATGCAC	0.648025	0.00432552	0.0273844
2402	A_73_P348406	IGF2	NM_174087	ref|Bos taurus insulin-like growth factor 2 (somatomedin A) (IGF2), mRNA [NM_174087]	GAATCCACAGCCTGGGTTTTGTCTTTAACCTTTATCGCTCGCAATCCCAATAAAGCATTT	0.646484	0.00421375	0.0490247
28188	A_73_P232567	A2LD1	NM_001075571	ref|Bos taurus AIG2-like domain 1 (A2LD1), mRNA [NM_001075571]	CTGATTATGCTGGGTTTTTCTTTTCCCTTGCTCTGCTTTGCTTTAATCTGAAGATAACAT	0.644291	0.00423914	0.0238346
53208	A_73_P404926	ETS2	NM_001080214	ref|Bos taurus v-ets erythroblastosis virus E26 oncogene homolog 2 (avian) (ETS2), mRNA [NM_001080214]	CTGGCCTCTCTGCTTCTCCTTTAATTGTAATGTAAAAGCTATAAAGCAGTATTTTTCTTG	0.642404	0.00586392	0.0271926
41400	A_73_P088356	IGF2BP3	NM_001192288	ref|Bos taurus insulin-like growth factor 2 mRNA binding protein 3 (IGF2BP3), mRNA [NM_001192288]	AAATGCAGCTCCATTATCCAGATACCTTGATGCAAAATAAAGTACTTCATTATTAGGTGC	0.629994	0.00261663	0.0456177
42921	A_73_P087076	ASTN2	ENSBTAT00000061605	gb|PREDICTED: Bos taurus astrotactin 2 (ASTN2), partial mRNA [XM_001787408]	TGACAACAAGGCGGAAGAGATAGCTGACAAGATCTACAACCTGTATAATGGGTACACGAG	0.629567	0.00269257	0.0301318
43921	A_73_P031051	WC1	NM_001143742	ref|Bos taurus WC1 isolate DV9 (WC1), mRNA [NM_001143742]	TATGAAGATACTCTTGCTGAAGCTGTGTATGAGGAGCTCGATTACCTTCTGACCCAGAAG	0.621892	0.00330303	0.0407883
36193	A_73_P379786	RRAGD	NM_001192828	ref|Bos taurus Ras-related GTP binding D (RRAGD), mRNA [NM_001192828]	TTGCTTCCGGAAGGCCATCCATGAAGTTTTTGAGGTGAGAATGAAAGTAGTGAAATCGCG	0.621313	0.00351479	0.0191937
22409	A_73_101645	SMYD2	NM_001076364	ref|Bos taurus SET and MYND domain containing 2 (SMYD2), mRNA [NM_001076364]	GCTGTAGTTATTTTTCCCTTCATGACTACTGTAATGTTCTGAACAAACATGAATGAAGAG	0.617137	0.00258275	0.0458184
51597	CUST_1292_PI427023673	OSBP2	ENSBTAG00000019146	oxysterol binding protein 2 [Source:HGNC Symbol;Acc:HGNC:8504]	TTATAAAAATACAAAAGTGAAAACACCAACGTATGAAAGGCCTTAGGGTACCCACTGGAG	0.61558	0.00354815	0.0403275
24920	A_73_P165447	ZNF683	ENSBTAT00000012691	gb|PREDICTED: Bos taurus zinc finger protein 683 (ZNF683), mRNA [XM_588398]	ATATTCTGGCAGCGCCATCAGAGAGGCAGATGGACCGGGACATGGACAAGGTCAAGGTGT	0.612156	0.00425282	0.0375512
41749	A_73_P046256	AFAP1L2	NM_001076375	ref|Bos taurus actin filament associated protein 1-like 2 (AFAP1L2), mRNA [NM_001076375]	CATTTATTTCCTTTGTCATTAACACTTGGCGTCCCAAGTGGTGAGTTAGTTAGATTTTTT	0.606753	0.00255407	0.0200577
49501	A_73_106673	GADD45G	NM_001045901	ref|Bos taurus growth arrest and DNA-damage-inducible, gamma (GADD45G), mRNA [NM_001045901]	TACGGGCACTGCTTCATTTTCTAAAGGACTATGCTGCTGCAGCTTTGAGTTTTACAATAA	0.606407	0.00199804	0.03243
6784	A_73_P048381	LTF	NM_180998	ref|Bos taurus lactotransferrin (LTF), mRNA [NM_180998]	AGAATATTTGGGGACAGAGTATGTCACGGCCATTGCCAACCTGAAAAAATGCTCAACCTC	0.604111	0.00361797	0.0332791
40058	A_73_112637	LOC614881	TC416994	histone H2A type 3	CCTCCCGGGGATGCTAACTGTGGGGACAGAAATTCTGCTGTCGATTAAACATACTTTTAT	0.603674	0.00220188	0.0180724
6362	A_73_104985	ATP6AP1L	NM_001207027	ref|Bos taurus ATPase, H+ transporting, lysosomal accessory protein 1-like (ATP6AP1L), transcript variant 1, mRNA [NM_001207027]	GTTTGTGTTCTATGCTGTTTTCTTTGTGATACAAGGTCTTCACCAAAAGTCTTGGTTTTT	0.603081	0.00292903	0.0338536
42243	A_73_P105036	LOC404176	ENSBTAT00000000553	Bos taurus T-cell receptor delta chain, mRNA (cDNA clone MGC:159602 IMAGE:8182494), complete cds	ATGGTTTTCTGCCGTTTTTCTTTGTCTCTGTTGCGTTTATTAAAGTGCATTGTATGTACC	0.603062	0.00198525	0.0198904
40273	A_73_P043336	SCRN1	NM_001110803	ref|Bos taurus secernin 1 (SCRN1), mRNA [NM_001110803]	CCTGCAGTGGGAACTGACTGTGTCGTCTTAATAGCCTTTTGTACAAATATCTACAAACCA	0.602946	0.00240581	0.00561257
5344	A_73_P194182	CYGB	NM_001206720	ref|Bos taurus cytoglobin (CYGB), mRNA [NM_001206720]	CATCACTTATCTAGAGTACCATGCACACGTCTATTGCATATACAGATATATTCTATATCC	0.59489	0.00220177	0.0207024
17639	A_73_109408	SERPING1	NM_174821	ref|Bos taurus serpin peptidase inhibitor, clade G (C1 inhibitor), member 1 (SERPING1), mRNA [NM_174821]	CCTCCAAAGCACTTTTTGCCACCTTCTCTGGTACAGATACAGCGGACTTCACAAATAAAA	0.585201	0.00156746	0.00196691
22361	A_73_P104706	BC134701	BC134701	gb|Bos taurus cDNA clone IMAGE:7943331. [BC134701]	CACGGTGTAGGTTTTACAGTCTCCTAATTTGTACTGGTAATGCATATTCCAAATAAATAG	0.580597	0.00236796	0.0122656
17506	A_73_P032521	NREP	NM_001105045	Bos taurus neuronal regeneration related protein (NREP), mRNA	GTGATCTTTACTGATGCACTCACGACAAGTACCCAATGTATTTTAGCTATTTTAGTAGTA	0.577609	0.00205179	0.0149023
20952	A_73_108058	GPR183	NM_001105442	ref|Bos taurus G protein-coupled receptor 183 (GPR183), mRNA [NM_001105442]	GGGAAAAGCTTCTTCAGAAACACAAAGTATCAACCAGACAGGAGGCTCCTCGCCCTTGGA	0.575574	0.00247234	0.0413481
23385	A_73_P091496	LOC10190733	ENSBTAT00000054987	Antigen WC1.1-like	CTGCTCAGATGGAGAGCAGAGTGCAGAGCCTTATCCAGCTATGAAGATGCTCTTGCTGAA	0.570652	0.00234382	0.0254521
7420	A_73_P030646	CD163L1	NM_176651	ref|Bos taurus CD163 molecule-like 1 (CD163L1), mRNA [NM_176651]	ATGAAAATTATGATGATGCTGAAGAAGTACCAGTGCCTGGAACTCCTTCTCCCTCTCAGG	0.542116	0.00144611	0.0133721
27798	CUST_1545_PI427023673	PIGQ	ENSBTAG00000016594	PREDICTED: Bos taurus phosphatidylinositol glycan anchor biosynthesis class Q (PIGQ), transcript variant X4, misc_RNA	TGGACCAGCTGTTCATCGGGACCTTGCTCTTCACCATCCTGATTTTCCTGCTTCCTACCA	0.54079	0.00159066	0.0194744
36343	A_73_P108951	MCAM	NM_001110062	ref|Bos taurus melanoma cell adhesion molecule (MCAM), mRNA [NM_001110062]	TAAAGTTATATTAGCACCAGGGTTCCTAATGGGAGAATGGTACTTGGAGATGAGAAATGG	0.538229	0.00146549	0.00394872
46894	A_73_P045951	PIGR	NM_174143	ref|Bos taurus polymeric immunoglobulin receptor (PIGR), mRNA [NM_174143]	GCACTTCAACTAGCATCTATGAGCTGGCACTTGCTAACAAATCAAAAATGTGAATTAATT	0.48702	0.00103097	0.00175846
37410	A_73_112330	BBS4	CO886930	PREDICTED: Bison bison bison Bardet-Biedl syndrome 4 (BBS4), transcript variant X5, mRNA	AGGGTATAAAGTCTCTTCCTTCCCTGTCTCTCTGCTACGGATTTCTCCTCCTTACAAGTA	0.486111	0.00163927	0.0150035
7007	A_73_113698	HSPB8	NM_001014955	ref|Bos taurus heat shock 22kDa protein 8 (HSPB8), mRNA [NM_001014955]	CTAGTGGTGTTGTGTATATGGGTGGGACGTGCGTGTCATTGTTATTTGAATTGTGCTGTT	0.476457	0.00122451	0.0234991
24300	A_73_P046241	CD300LB	NM_001105023	ref|Bos taurus CD300 molecule-like family member b (CD300LB), mRNA [NM_001105023]	GGGGCCTCTGCTCTCTGGAGACCAGGCTGCTCACAATAAATCATCTCCATAGTTTCTCAT	0.440778	0.000995208	0.0447334
48866	A_73_P312016	CDHR5	NM_001103326	ref|Bos taurus cadherin-related family member 5 (CDHR5), mRNA [NM_001103326]	AGCCTCAAGGGTTTGACAACCACGCTTTCCTCAACGACTCGGACGACGCCAACTGGGCGC	0.383655	0.000853951	0.00157279
