# Supplementary material for: Subclinical endometritis in dairy cattle is associated with distinct mRNA expression patterns in blood and endometrium
Source: PLoS One. 2019 Aug 2;14(8):e0220244. doi: 10.1371/journal.pone.0220244 (PMC6677313; doi:10.1371/journal.pone.0220244)
Supplement: S5 Table — (XLSX) [file pone.0220244.s011.xlsx]

## Sheet: Feuil1
ID	Analysis	Molecules in Network	Score	Focus Molecules	Top Diseases and Functions
1	20180202_Endo__DD_Lim.IPA - 2018-02-02 02:51 PM	ABCB1, ADAM33, ANKRD50, APP, BCAT2, BEND5, CAVIN4, CDKL2, CPA6, KLK10, METTL16, MYOT, PHYH, PRSS12, PRSS22, PRSS23, Rab11, RAB25, RASAL1, RTN2, Serine Protease, SGK2, SHMT1, SLPI, SORCS1, SUN5, TBC1D10C, TCF21, THOC1, trypsin, TTPA, WFDC2, ZBBX, ZNF385B, ZZEF1	55	32	Amino Acid Metabolism, Small Molecule Biochemistry, Lipid Metabolism
2	20180202_Endo__DD_Lim.IPA - 2018-02-02 02:51 PM	60S ribosomal subunit, CDK2AP2, CHCHD1, CUL5, DKC1, EIF3A, GAR1, GPATCH4, HNRNPA0, HNRNPDL, HNRNPM, HNRNPU, ILF3, MATR3, MKRN2, Mucin, NDP, NPM1, PABPC4, PTBP2, RBM4B, Ribosomal 40s subunit, Rnr, RPL9, RPL31, RPL35A, RPS3, RPS28, RPS27L, RPS4X, SQOR, TCERG1, TMED9, TRA2A, Vegf	50	30	RNA Post-Transcriptional Modification, Cancer, Cell Death and Survival
3	20180202_Endo__DD_Lim.IPA - 2018-02-02 02:51 PM	Actin, Adaptor protein 2, AMPH, ARPC3, CACYBP, Calcineurin A, CALM1 (includes others), Calmodulin, CAMK1D, CDK5R1, CHD3, Ck2, DEUP1, EPN2, FRMD5, GLTP, HNRNPA1, HSP90AB1, IRS4, KRT80, LDHA, MITF, MPP6, MYL6B, NTRK1, NUP155, RCBTB2, SDAD1, SEPT8, SEPT11, SLF2, SNW1, STT3B, tubulin, UBE2E2	47	29	Infectious Diseases, Cell Morphology, Cellular Assembly and Organization
4	20180202_Endo__DD_Lim.IPA - 2018-02-02 02:51 PM	ADGRL1, ART3, ATAD2, ATPase, BLM, Cbp/p300, CHAF1B, CHEK1, CPNE5, DHRS7, DHRS12, ENTPD2, FHL1, Hdac, Histone h3, Histone h4, ITGA8, KDM5B, KIAA0895, KIAA1549L, KIF5C, L3MBTL2, LEMD3, LUZP1, MARCKSL1, MutS alpha, NRG1, nucleoside-triphosphatase, POGZ, RAN, REST, SLC26A4, SOX4, STAT, WDHD1	42	27	Cell Cycle, Embryonic Development, Cancer
5	20180202_Endo__DD_Lim.IPA - 2018-02-02 02:51 PM	ADAMTS5, ATP8A2, CK1, COCH, Collagen type II, CYP, GTPase, HMGB1, Ifn, IFN Beta, IL1, IL37, LHX2, Mapk, MHC Class II (complex), MIF, OLFM2, Pro-inflammatory Cytokine, RALGPS2, RGS14, ROBO2, S100A8, S100A10, SAA, SDC3, SIX1, SRGAP2, Talin, TIAM1, Tlr, Tnf (family), TRIML2, Wnt, XRN2, ZNF507	27	20	Cell-To-Cell Signaling and Interaction, Cellular Movement, Hematological System Development and Function
6	20180202_Endo__DD_Lim.IPA - 2018-02-02 02:51 PM	ACLY, ACSL1, AMPK, Calcineurin protein(s), CEACAM1, Cofilin, CREB3L2, Cyclin B, DDAH1, ELOVL6, ERGIC3, F Actin, FTO, GPAT4, histone deacetylase, Immunoglobulin, Insulin, KCNQ1, LEPR, MAT1A, Mek, N-cor, NPY, Nr1h, P38 MAPK, PCSK2, PCSK5, PPARGC1A, Proinsulin, RANBP1, Rxr, SEMA3A, SFRP1, Srebp, VEGFD	27	20	Digestive System Development and Function, Organismal Functions, Lipid Metabolism
7	20180202_Endo__DD_Lim.IPA - 2018-02-02 02:51 PM	ABHD2, ADGRB1, ADGRB2, ATP6V0B, BPIFA1, CASTOR1, CBLN2, CORO2A, CYP27C1, FAM172A, FSCN2, GIMAP1, GLP1R, GP2, KCNK12, KCNT2, LRFN5, LRRCC1, miR-185-5p (and other miRNAs w/seed GGAGAGA), miR-4723-5p (and other miRNAs w/seed GGGGGAG), miR-504-3p (and other miRNAs w/seed GGGAGAG), miR-6773-3p (miRNAs w/seed CUGUCAC), MYADM, NOL8, NPBWR1, OR2T33, PI16, SDF2, SEC14L3, SSX2IP, SYNPR, TIAF1, TMEM130, TTY…	27	20	Hereditary Disorder, Ophthalmic Disease, Organismal Injury and Abnormalities
8	20180202_Endo__DD_Lim.IPA - 2018-02-02 02:51 PM	ADGRL1, AJAP1, BEND6, C2CD3, CCL17, CCR10, CCRL2, CDKL5, CRISPLD1, CSF3R, FFAR2, GPA33, GPR39, GPR107, GRB2, IGSF1, KLK14, LRRC4B, MEGF9, miR-762 (and other miRNAs w/seed GGGCUGG), NPY, PANX2, Pik3r, PRLHR, PTER, PTGIR, RAMP3, RASL10B, RP1L1, SIGLEC14, SLC47A1, STUM, Trk Receptor, USP53, ZNF32	24	18	Cell-To-Cell Signaling and Interaction, Connective Tissue Development and Function, Cell Signaling
9	20180202_Endo__DD_Lim.IPA - 2018-02-02 02:51 PM	ADNP, APH1B, ATP2C2, BGLAP, BMP2, BOD1L1, CCSER1, CYP26A1, FABP1, GARNL3, GPM6A, IFT43, IFT122, KHDC3L, KLK7, LOX, miR-200b-3p (and other miRNAs w/seed AAUACUG), miR-4777-5p (miRNAs w/seed UCUAGAU), PEX11A, PISD, PLIN1, PPARG, PYGL, RDH10, RIOX1, SAXO2, SIX1, SLC39A10, SOX2, THNSL1, TLE6, TMEFF1, TNFRSF11B, TTC21B, UNC50	24	18	Connective Tissue Disorders, Dermatological Diseases and Conditions, Developmental Disorder
10	20180202_Endo__DD_Lim.IPA - 2018-02-02 02:51 PM	ADAMTSL2, CCNI, CLIP3, DOCK1, DTD1, EMILIN3, EXTL3, GIMAP6, GOLT1A, HAPLN3, histone deacetylase, MAD1L1, METAP2, miR-1250-5p (miRNAs w/seed CGGUGCU), miR-196b-3p (miRNAs w/seed CGACAGC), miR-6825-5p (and other miRNAs w/seed GGGGAGG), MXD3, NCDN, PIP4K2B, RAB5B, SCARA3, SUN1, SUN2, TAOK2, TMEM37, TMEM213, TPPP, TSPEAR, TSPYL5, TXNDC11, UPB1, WNT6, WNT10A, WNT2B, ZDHHC1	22	17	Cellular Assembly and Organization, Nervous System Development and Function, Neurological Disease
11	20180202_Endo__DD_Lim.IPA - 2018-02-02 02:51 PM	ACBD7, AQP8, AR, ARHGAP17, CASS4, CDKAL1, CUX2, FAM160A1, FXN, GSTM1, LOC102724788/PRODH, LTBP3, MEI1, MFSD2B, miR-1285-3p (and other miRNAs w/seed CUGGGCA), miR-3612 (and other miRNAs w/seed GGAGGCA), N4BP2, NTF4, OSBPL1A, P2RX1, PIGA, PLEKHG4, RAC1, RNF20, SCAP, SFSWAP, SLC30A7, SPTBN2, TBCA, TMC8, UPK3BL1, WDR91, ZNF3, ZNF318, ZSCAN2	22	17	Hereditary Disorder, Neurological Disease, Organismal Injury and Abnormalities
12	20180202_Endo__DD_Lim.IPA - 2018-02-02 02:51 PM	AHSG, apyrase, C2, C3, C1q, CEACAM8, CFB, Complement component 1, creatine kinase, CRYBG1, CSF, elastase, ELF2, EPHB2, ERK1/2, ETS, FGF18, Fibrinogen, FSTL3, GSC, HDL, HDL-cholesterol, IL23, Inflammasome (Nalp3, Asc, Casp1), LBP, Patched, PLA2, SAA1, Secretase gamma, SLC39A6, Smad2/3, SMPD2, SPAG11B, TCF, TLR7/8	20	16	Carbohydrate Metabolism, Lipid Metabolism, Molecular Transport
13	20180202_Endo__DD_Lim.IPA - 2018-02-02 02:51 PM	ATP6V0A2, ATP6V0A4, ATP6V1B1, BCL2A1, c-Src, CARD10, CD3 group, Cpla2, DOK5, Ggt, glutathione peroxidase, GST, GSTM1, GSTM2, Ikb, IKK (complex), IL-1R, Integrin alpha 3 beta 1, JUN/JUNB/JUND, NFkB (complex), NfkB-RelA, PDLIM1, peptidase, PI3, PXR ligand-PXR-Retinoic acid-RXRα, SLC7A5, SOX5, sphingomyelinase, STAP2, Tnf receptor, TNFRSF11B, TNFRSF13C, TRAF, Vacuolar H+ ATPase, ZC3H13	20	16	Small Molecule Biochemistry, Drug Metabolism, Metabolic Disease
14	20180202_Endo__DD_Lim.IPA - 2018-02-02 02:51 PM	Akt, BZW2, Cdc2, CDK4/6, CDKN2C, CDKN2D, Cyclin A, Cyclin D, Cyclin E, DEFB1, DNA-PK, E2f, estrogen receptor, Foxo, HIRA, Histone H1, IRS, Kallikrein, KLF1, LTF, Myosin, N-Cadherin, PCDH19, PDGFD, PELP1, PLAC8, PP1 protein complex group, PTMA, PTPase, PTPRE, Rb, Syntaxin, TALDO1, TFF3, TTC3	20	16	Cell Death and Survival, Cancer, Organismal Injury and Abnormalities
15	20180202_Endo__DD_Lim.IPA - 2018-02-02 02:51 PM	BCL2L1, CTNNA3, CXCR5, EFNA3, EGLN, EMP1, FCGBP, GCNT3, GNRH, GOT, hemoglobin, HISTONE, Iga, Ige, IgG, IgG1, Igg3, IgG2a, IgG2b, Igm, IL2, IL12 (complex), IL12 (family), Interferon alpha, ITGA6, LCP1, LRMP, MAP3K8, MHC Class I (complex), Pka, PLP1, PTCH1, STAT5a/b, TNFRSF1B, ZNF292	20	16	Digestive System Development and Function, Gastrointestinal Disease, Organ Morphology
16	20180202_Endo__DD_Lim.IPA - 2018-02-02 02:51 PM	ADAM23, ADGRB1, ADGRB2, APOM, ATP13A2, CUX2, ECE2, ELP2, GCHFR, GNB2, GNB1L, GPR160, GTF2H3, GTF2H4, Hamp/Hamp2, HNF4A, LAPTM4A, LTB4R2, NAT8, PDE11A, RASL12, RNA polymerase II, SSRP1, SSTR4, TAGLN2, TGFBR1, TIGD6, TRAPPC8, TRAPPC13, TTC38, UCHL3, USP30, VN1R1, WDR13, YIF1A	20	16	Cardiovascular Disease, Hematological Disease, Metabolic Disease
17	20180202_Endo__DD_Lim.IPA - 2018-02-02 02:51 PM	Acot1, AHR, CCL17, CCL28, Chil3/Chil4, CNKSR2, COL11A1, COL9A3, CREB1, DEFB1, FFAR1, GHSR, GLA, Gpd, GPD2, GPER1, Gsta1, HDDC2, IFNG, Ins1, LGR4, miR-376a-3p (and other miRNAs w/seed UCAUAGA), miR-4255 (miRNAs w/seed AGUGUUC), MYBBP1A, PCDH17, PDP2, PLXDC2, RDH16, Retnla, RNFT1, SAA1, SPTSSB, TBK1, UPK3BL1, ZP3	20	16	Cellular Movement, Hematological System Development and Function, Immune Cell Trafficking
18	20180202_Endo__DD_Lim.IPA - 2018-02-02 02:51 PM	ADGRB2, ADGRL1, ADRA1B, BPIFB1, CALCR, CCR10, CDKN1A, DCBLD1, ETS1, FBRSL1, FZD9, GPER1, HOXB3, IQCK, KLHL23/PHOSPHO2-KLHL23, Lefty, miR-1207-3p (and other miRNAs w/seed CAGCUGG), miR-6887-3p (miRNAs w/seed CCCCUCC), miR-8062 (miRNAs w/seed AGUGAUU), NPPC, PCNX1, PHC1, PHC2, PHC3, PHF14, PHLDA2, PLAA, PLPP2, PRLHR, RYBP, SLCO1A2, SPATC1L, TMEM130, WDR17, ZCCHC17	20	16	Connective Tissue Development and Function, Connective Tissue Disorders, Organ Morphology
19	20180202_Endo__DD_Lim.IPA - 2018-02-02 02:51 PM	Ap1, calpain, CD3, CD247, chemokine, COL4A5, CRIP1, ELF5, Focal adhesion kinase, G protein alphai, Gpcr, Gsk3, HNRNPA2B1, IGF2R, LPIN2, MAPK8, Mmp, MTORC1, NFAT (complex), NMDA Receptor, p85 (pik3r), PRKCA, PYGL, Rac, RAE1, Ras, Ras homolog, SDF2, SELE, Sfk, SH2D3A, Shc, SNAP23, SRC (family), TCR	18	15	Organ Morphology, Organismal Injury and Abnormalities, Reproductive System Development and Function
20	20180202_Endo__DD_Lim.IPA - 2018-02-02 02:51 PM	ALT, CA1, CA5B, Carbonic anhydrase, CP, DYRK3, ELAVL1, EPO, Gm21596/Hmgb1, GOT, HKDC1, Hrk, KIAA1024, MGST3, mir-155, miR-155-5p (miRNAs w/seed UAAUGCU), NfkB-RelA, NfkB1-RelA, NOS2, NOSIP, NPY5R, PDSS2, RHOV, RNF123, SCUBE2, SELENOS, SERPINB13, SMKR1, SMPD2, SNCA, SPOCK1, TEC/BTK/ITK/TXK/BMX, TNF, ZNF77, ZNF711	16	14	Inflammatory Response, Cell Signaling, Small Molecule Biochemistry
21	20180202_Endo__DD_Lim.IPA - 2018-02-02 02:51 PM	ACAC, ADGRB1, ANGPTL6, ASL, CSF3R, ELL3, ERH, EZH2, GHSR, GTF2H4, HCRTR1, HOMEZ, Irs3, LEP, LOX, LTF, LYPD6B, MC3R, MC4R, mir-143, mir-491, miR-491-5p (and other miRNAs w/seed GUGGGGA), MISP, Mt2, MT-CYB, NPBWR1, NPEPL1, NPY5R, PRKAA2, PRLHR, RNF181, SLC22A18AS, SLC6A20, TMEM132B, TP53	16	14	Nutritional Disease, Protein Synthesis, Digestive System Development and Function
22	20180202_Endo__DD_Lim.IPA - 2018-02-02 02:51 PM	ADGRA3, ADGRB2, CASP3, CCDC146, CIP2A, COL9A3, EGFR, EGFR/PDGFR/IGFR, ENKUR, GHSR, Girk, GPC5, Gpcr, GPER1, GPR143, HCRTR1, KCTD9, KRAS, MC3R, MED4, NPFFR2, NPY4R/NPY4R2, NPY5R, P2RY10, PI3Kγ, PIK3R1, PNKD, RAI14, Rasgrf, Retnla, Rgs, SSTR4, TAAR8, TNS4, WNK3	16	14	Cellular Development, Cancer, Gastrointestinal Disease
23	20180202_Endo__DD_Lim.IPA - 2018-02-02 02:51 PM	ACAT1, ADCY, ADCY2, ADRB, AGR2, ANXA6, CaMKII, CDH2, Cg, Creb, EIF2S2, Erm, EYA2, FSH, GNLY, Growth hormone, HUNK, Ldh (complex), LDL-cholesterol, Lh, MAOB, Mitochondrial complex 1, NPPC, p70 S6k, PEPCK, Pka catalytic subunit, Pkc(s), PLC, PP2A, Ppp2c, Rsk, SLC2A8, SLC9A3R1, TSH, voltage-gated calcium channel	15	13	Cellular Function and Maintenance, Molecular Transport, Small Molecule Biochemistry
24	20180202_Endo__DD_Lim.IPA - 2018-02-02 02:51 PM	14-3-3, 20s proteasome, 26s Proteasome, AGRP, BIRC7, caspase, Caspase 3/7, chymotrypsin, cytochrome C, FAS, FGD3, FGD4, HLA-DR, Hsp27, Hsp70, Hsp90, Ifn gamma, Jnk, Lamin b, MAP1LC3, MAP1LC3A, MAPKAP1, MHC CLASS I (family), Nos, P glycoprotein, PARP, PINK1, PRKAA, Rar, SFTPC, Smad, SSH2, TNK2, TRA, Ubiquitin	13	12	Infectious Diseases, Cell Death and Survival, Cell Morphology
25	20180202_Endo__DD_Lim.IPA - 2018-02-02 02:51 PM	Alpha tubulin, BCR (complex), CLIP1, CMIP, CNKSR3, collagen, DIP2B, Dynein, ERK, Fcer1, growth factor receptor, Integrin, JAK, JINK1/2, JIP1/2/3, Lfa-1, LRP, LRP8, MAP2K1/2, MAPK8IP1, NCK, Nfat (family), Pak, Pdgf (complex), PLC gamma, Ptk, Raf, Rap1, RELN, Sapk, Sos, SYK/ZAP, TPR, VAV, ZC3HC1	9	9	Embryonic Development, Nervous System Development and Function, Organ Development
