# Supplementary material for: Subclinical endometritis in dairy cattle is associated with distinct mRNA expression patterns in blood and endometrium
Source: PLoS One. 2019 Aug 2;14(8):e0220244. doi: 10.1371/journal.pone.0220244 (PMC6677313; doi:10.1371/journal.pone.0220244)
Supplement: S6 Table — (XLSX) [file pone.0220244.s012.xlsx]

## Sheet: Feuil1
Categories	Diseases or Functions Annotation	p-Value	Predicted Activation State	Activation z-score	Molecules	# Molecules
Cancer, Organismal Injury and Abnormalities	Cancer	1,58E-11		1,017	ABCB1, ACAT1, ACLY, ADAM23, ADAMTS5, ADCY2, ADGRB1, ADGRL1, AGR2, AHSG, AJAP1, AMPH, ANGPTL6, ANXA6, APP, ARHGAP17, ATAD2, ATP2C2, ATP6V1B1, BCL2L1, BIRC7, BLM, C2, C3, CA1, CACYBP, CALM1 (includes others), CCL19, CD247, CDH2, CDK2AP2, CDK5R1, CDKN2C, CDKN2D, CEACAM1, CFB, CHEK1, CIP2A, CMIP, COCH, COL11A1, CRIP1, CRYBG1, CUX2, CXCR5, DEFB1, DHRS7, EIF3A, ELF2, ELOVL6, EMP1, EPHB2, EYA2, FAS, FCG…	183
Cancer, Organismal Injury and Abnormalities	Solid tumor	5,03E-11		-0,383	ABCB1, ACAT1, ACLY, ADAM23, ADAMTS5, ADCY2, ADGRB1, ADGRL1, AGR2, AHSG, AJAP1, AMPH, ANGPTL6, ANXA6, APP, ARHGAP17, ATAD2, ATP2C2, ATP6V1B1, BCL2L1, BIRC7, BLM, C2, C3, CA1, CACYBP, CALM1 (includes others), CCL19, CD247, CDH2, CDK2AP2, CDK5R1, CDKN2C, CDKN2D, CEACAM1, CFB, CHEK1, CIP2A, CMIP, COCH, COL11A1, COL4A5, COL9A3, CRIP1, CRYBG1, CXCR5, DEFB1, DHRS7, DKC1, EIF3A, ELF2, ELOVL6, EMP1, EPHB2…	182
Cancer, Organismal Injury and Abnormalities	Malignant solid tumor	1,46E-10		0,286	ABCB1, ACAT1, ACLY, ADAM23, ADAMTS5, ADCY2, ADGRB1, AGR2, AHSG, AJAP1, AMPH, ANGPTL6, ANXA6, APP, ARHGAP17, ATAD2, ATP2C2, ATP6V1B1, BCL2L1, BIRC7, BLM, C2, C3, CA1, CACYBP, CALM1 (includes others), CCL19, CD247, CDH2, CDK2AP2, CDK5R1, CDKN2C, CDKN2D, CEACAM1, CFB, CHEK1, CIP2A, CMIP, COCH, COL11A1, CRIP1, CRYBG1, CXCR5, DEFB1, DHRS7, EIF3A, ELF2, ELOVL6, EMP1, EPHB2, EYA2, FAS, FCGBP, FGD4, FGF1…	168
Cancer, Organismal Injury and Abnormalities	Nonhematologic malignant neoplasm	3,13E-11		0,115	ABCB1, ACAT1, ACLY, ADAM23, ADAMTS5, ADCY2, ADGRB1, AGR2, AHSG, AJAP1, AMPH, ANGPTL6, APP, ARHGAP17, ATAD2, ATP2C2, ATP6V1B1, BCL2L1, BIRC7, BLM, C2, C3, CA1, CACYBP, CALM1 (includes others), CCL19, CDH2, CDK2AP2, CDK5R1, CDKN2C, CDKN2D, CEACAM1, CFB, CHEK1, CIP2A, COCH, COL11A1, CRIP1, CRYBG1, DEFB1, DHRS7, EIF3A, ELOVL6, EMP1, EPHB2, EYA2, FAS, FCGBP, FGD4, FGF18, FHL1, FSTL3, FTO, GCNT3, GPAT4…	158
Cell Death and Survival	Cell death	7,47E-09		1,467	ABCB1, ACAT1, ACLY, ADNP, AGR2, ANXA6, APP, ATAD2, ATP13A2, BCL2A1, BCL2L1, BIRC7, BLM, C3, CACYBP, CALCR, CALM1 (includes others), CAMK1D, CCL19, CCNI, CD247, CDH2, CDK5R1, CDKN2C, CDKN2D, CEACAM1, CFB, CHEK1, CLIP3, CMIP, CREB3L2, CRIP1, CUL5, DEFB1, EFNA3, ELF5, EMP1, EPHB2, EYA2, FAS, FGF18, FSTL3, GIMAP1, GNB2, GNLY, GP2, GPM6A, GSTM1, HCST, HMGB1, HNF4A, HNRNPA1, HSP90AB1, HUNK, IGF2R, IL2,…	154
Cancer, Organismal Injury and Abnormalities	Non-melanoma solid tumor	5,53E-07		-0,064	ABCB1, ACAT1, ACLY, ADAM23, ADAMTS5, ADGRB1, ADGRL1, AGR2, AHSG, AJAP1, AMPH, ANGPTL6, ANXA6, ARHGAP17, ATAD2, BCL2L1, BIRC7, BLM, C3, CA1, CACYBP, CALM1 (includes others), CCL19, CD247, CDH2, CDK5R1, CDKN2C, CDKN2D, CEACAM1, CFB, CHEK1, CIP2A, CMIP, COCH, COL11A1, COL4A5, COL9A3, CRYBG1, CXCR5, DEFB1, DHRS7, DKC1, ELF2, EPHB2, FAS, FCGBP, FGD4, FGF18, FSTL3, GLTP, GPM6A, GSTM1, HMGB1, HNF4A, HNR…	134
Cell Death and Survival	Necrosis	2,19E-09		1,395	ABCB1, ACAT1, ACLY, ADNP, AGR2, APP, ATAD2, ATP13A2, BCL2A1, BCL2L1, BIRC7, BLM, C3, CALCR, CCL19, CCNI, CD247, CDH2, CDK5R1, CDKN2C, CDKN2D, CEACAM1, CHEK1, CREB3L2, DEFB1, EFNA3, ELF5, EMP1, EPHB2, EYA2, FAS, FGF18, FSTL3, GIMAP1, GNB2, GNLY, GP2, GPM6A, GSTM1, HCST, HMGB1, HNF4A, HNRNPA1, HSP90AB1, IGF2R, IL2, ITGA6, LBP, LDHA, LEPR, LTF, MAOB, MAP1LC3A, MAP3K8, MAPK8, MAPK8IP1, MAPKAP1, MIF, …	129
Cell Death and Survival	Apoptosis	8,65E-07		1,508	ABCB1, ACLY, ADNP, ANXA6, APP, ATAD2, BCL2A1, BCL2L1, BIRC7, BLM, C3, CALCR, CAMK1D, CCL19, CCNI, CD247, CDH2, CDK5R1, CDKN2C, CDKN2D, CEACAM1, CHEK1, CLIP3, CMIP, CREB3L2, CRIP1, CUL5, DEFB1, ELF5, EPHB2, EYA2, FAS, FSTL3, GNB2, GNLY, GP2, HCST, HMGB1, HNF4A, HNRNPA1, HSP90AB1, HUNK, IGF2R, IL2, ILF3, ITGA6, KCNQ1, LDHA, LEPR, LHX2, LTF, MAP1LC3A, MAP3K8, MAPK8, MAPK8IP1, MAPKAP1, MIF, MITF, MYB…	119
Organismal Survival	Organismal death	7,85E-09	Increased	3,265	ABCB1, ACLY, ADAM23, ADNP, AGR2, AMPH, ANGPTL6, APP, ASL, ATP8A2, BCL2A1, BCL2L1, BLM, C3, CA5B, CALCR, CARD10, CD247, CDH2, CDK5R1, CDKN2C, CDKN2D, CEACAM1, CFB, CHEK1, CLIP3, COL11A1, CREB3L2, CTNNA3, CUX2, DDAH1, DEFB1, DKC1, EFNA3, EPHB2, EPN2, FAS, FTO, GCNT3, GNLY, GPD2, GSC, GSTM1, HCST, HIRA, HMGB1, HNF4A, HNRNPA1, HOXB3, HSP90AB1, IGF2R, IL2, ILF3, ITGA6, ITGA8, KCNQ1, KDM5B, KLF1, L3MBT…	118
Cancer, Organismal Injury and Abnormalities	Tumorigenesis of tissue	2,58E-07		0,449	ABCB1, ACAT1, ACLY, ADAM23, ADAMTS5, AGR2, AHSG, AJAP1, AMPH, ANGPTL6, ARHGAP17, ATAD2, BCL2L1, BIRC7, C3, CA1, CACYBP, CALM1 (includes others), CCL19, CD247, CDH2, CDK5R1, CDKN2C, CEACAM1, CFB, CHEK1, CIP2A, COCH, COL11A1, CUX2, DEFB1, DHRS7, DKC1, EPHB2, FAS, FCGBP, FGD4, FGF18, FSTL3, GLTP, GPM6A, GSTM1, HMGB1, HNF4A, HNRNPA1, HOXB3, HSP90AB1, IGF2R, IL2, ILF3, ITGA6, ITGA8, KLK10, LDHA, LEPR,…	117
Cancer, Organismal Injury and Abnormalities	Abdominal neoplasm	9,27E-07		0,707	ABCB1, ACAT1, ACLY, ADAM23, ADAMTS5, AGR2, AHSG, AMPH, ANGPTL6, ARHGAP17, ATAD2, ATP6V1B1, BCL2L1, BIRC7, C3, CA1, CACYBP, CCL19, CDH2, CDK5R1, CDKN2C, CDKN2D, CEACAM1, CFB, CHEK1, COCH, COL11A1, CRIP1, CRYBG1, DEFB1, DHRS7, EIF3A, EMP1, EPHB2, EYA2, FAS, FGF18, FHL1, FSTL3, GCNT3, GLTP, GPM6A, GSTM1, HMGB1, HNF4A, HNRNPA1, HNRNPA2B1, HNRNPDL, HSP90AB1, IGF2R, IL2, ILF3, ITGA6, KLK10, LBP, LCP1, …	117
Cancer, Organismal Injury and Abnormalities	Neoplasia of epithelial tissue	2,30E-07		0,373	ABCB1, ACAT1, ACLY, ADAM23, ADAMTS5, AGR2, AHSG, AJAP1, AMPH, ANGPTL6, ARHGAP17, ATAD2, BCL2L1, BIRC7, C3, CA1, CACYBP, CALM1 (includes others), CCL19, CDH2, CDK5R1, CDKN2C, CEACAM1, CFB, CHEK1, CIP2A, COCH, COL11A1, DEFB1, DHRS7, DKC1, EPHB2, FAS, FCGBP, FGD4, FGF18, FSTL3, GLTP, GPM6A, GSTM1, HMGB1, HNF4A, HNRNPA1, HSP90AB1, IGF2R, IL2, ILF3, ITGA6, ITGA8, KLK10, LDHA, LEPR, LHX2, LMO7, LRP8, L…	112
Cellular Movement	Cell movement	1,03E-08		1,094	ABHD2, ADAM33, ADGRB1, AGR2, AHSG, AJAP1, APP, ARPC3, BCL2L1, BIRC7, BLM, C2, C3, CAMK1D, CARD10, CCL19, CCL28, CD247, CDH2, CDK5R1, CDKN2C, CEACAM1, CFB, CIP2A, CLIP1, COCH, COL11A1, CUL5, CXCR5, DEFB1, EFNA3, EIF3A, EPHB2, EYA2, FAS, FGD4, FHL1, FRMD5, GNB2, GNLY, GPM6A, HMGB1, HNF4A, HNRNPA2B1, HSP90AB1, IGF2R, IL2, IL37, ILF3, ITGA6, ITGA8, KDM5B, LBP, LCP1, LDHA, LEPR, LMO7, LRP8, LTF, MAP3K…	111
Cancer, Organismal Injury and Abnormalities	Abdominal cancer	1,90E-07		0,964	ABCB1, ACAT1, ACLY, ADAM23, ADAMTS5, AGR2, AHSG, AMPH, ANGPTL6, ARHGAP17, ATAD2, ATP6V1B1, BCL2L1, BIRC7, C3, CA1, CACYBP, CCL19, CDH2, CDK5R1, CDKN2C, CEACAM1, CFB, CHEK1, COCH, COL11A1, CRIP1, CRYBG1, DEFB1, DHRS7, EIF3A, EMP1, EPHB2, EYA2, FAS, FGF18, FHL1, FSTL3, GCNT3, GPM6A, GSTM1, HMGB1, HNF4A, HNRNPA1, HNRNPA2B1, HNRNPDL, HSP90AB1, IGF2R, IL2, ILF3, ITGA6, KLK10, LBP, LCP1, LDHA, LEPR, LR…	110
Cancer, Organismal Injury and Abnormalities	Carcinoma	1,49E-07		0,614	ABCB1, ACAT1, ACLY, ADAM23, ADAMTS5, AGR2, AHSG, AJAP1, AMPH, ANGPTL6, ARHGAP17, ATAD2, BCL2L1, BIRC7, C3, CA1, CACYBP, CALM1 (includes others), CCL19, CDH2, CDK5R1, CDKN2C, CEACAM1, CFB, CHEK1, CIP2A, COCH, COL11A1, DEFB1, DHRS7, EPHB2, FAS, FCGBP, FGD4, FGF18, FSTL3, GPM6A, GSTM1, HMGB1, HNF4A, HNRNPA1, HSP90AB1, IGF2R, IL2, ILF3, ITGA6, ITGA8, KLK10, LDHA, LEPR, LHX2, LMO7, LRP8, LTF, MAPK8, M…	106
Cellular Movement	Migration of cells	5,18E-08		0,925	ABHD2, ADAM33, ADGRB1, AHSG, APP, BCL2L1, BIRC7, BLM, C2, C3, CAMK1D, CARD10, CCL19, CCL28, CD247, CDH2, CDK5R1, CDKN2C, CEACAM1, CFB, CIP2A, COCH, COL11A1, CUL5, CXCR5, DEFB1, EFNA3, EPHB2, EYA2, FAS, FHL1, FRMD5, GNLY, GPM6A, HMGB1, HNF4A, HNRNPA2B1, HSP90AB1, IGF2R, IL2, IL37, ILF3, ITGA6, ITGA8, KDM5B, LBP, LCP1, LDHA, LEPR, LMO7, LRP8, LTF, MAP3K8, MAPK8, MARCKSL1, MAT1A, MIF, MITF, MYADM, N…	99
Cancer, Gastrointestinal Disease, Organismal Injury and Abnormalities	Digestive organ tumor	1,38E-06		0,181	ABCB1, ACLY, ADAM23, AGR2, AHSG, AJAP1, AMPH, ANGPTL6, ARHGAP17, ATAD2, BCL2L1, CA1, CACYBP, CCL19, CDH2, CDK5R1, CDKN2C, CEACAM1, CFB, CIP2A, COCH, COL11A1, CRIP1, CRYBG1, EIF3A, EMP1, EPHB2, FAS, FGD4, FSTL3, GCNT3, GLTP, GPM6A, GSTM1, HMGB1, HNF4A, HNRNPA1, HNRNPA2B1, HNRNPDL, HSP90AB1, IGF2R, IL2, ILF3, ITGA6, ITGA8, LBP, LDHA, LEPR, LRP8, LTF, MAPK8, MAPK8IP1, MIF, NPM1, NPY, NRG1, NTRK1, OS…	93
Cancer, Organismal Injury and Abnormalities	Breast or colorectal cancer	1,14E-08		0,943	ABCB1, ACLY, ADAM23, ADAMTS5, ADCY2, AGR2, AMPH, APP, ATAD2, ATP2C2, BCL2L1, C2, C3, CA1, CACYBP, CALM1 (includes others), CCL19, CDH2, CDK2AP2, CDKN2C, CEACAM1, CHEK1, CIP2A, COCH, CRIP1, CRYBG1, EIF3A, ELOVL6, EMP1, EPHB2, FAS, FCGBP, FSTL3, FTO, GPAT4, GPATCH4, GSTM1, HMGB1, HNF4A, HNRNPA1, HNRNPA2B1, HNRNPM, HSP90AB1, IL2, ILF3, ITGA6, LBP, LDHA, LEPR, LMO7, LRP8, LTF, MAP3K8, MAPK8, MAPK8IP1…	92
Gene Expression	Expression of RNA	1,82E-03		-0,399	ADNP, AGR2, AMPH, APP, ATAD2, BCL2L1, BEND5, BLM, CALCR, CAVIN4, CDH2, CDK5R1, CDKN2C, CHD3, CREB3L2, CUX2, ELF2, ELF5, ELL3, EPHB2, EPN2, FAS, FSTL3, GSC, HIRA, HMGB1, HNF4A, HNRNPA1, HNRNPA2B1, HNRNPU, HOXB3, IGSF1, IL2, ILF3, ITGA6, KCNQ1, KDM5B, KLF1, L3MBTL2, LEPR, LHX2, LPIN2, LRP8, MAP3K8, MAPK8, MAPK8IP1, MARCKSL1, MATR3, MIF, MITF, MXD3, MYADM, MYBBP1A, NDP, NPM1, NRG1, PABPC4, PDLIM1, P…	90
Cancer, Gastrointestinal Disease, Organismal Injury and Abnormalities	Digestive system cancer	1,28E-06		0,332	ABCB1, ACLY, ADAM23, AGR2, AHSG, AJAP1, AMPH, ANGPTL6, ARHGAP17, ATAD2, BCL2L1, CA1, CACYBP, CCL19, CDH2, CDK5R1, CDKN2C, CEACAM1, CFB, CIP2A, COCH, COL11A1, CRIP1, CRYBG1, EIF3A, EMP1, EPHB2, FAS, FGD4, FSTL3, GCNT3, GPM6A, GSTM1, HMGB1, HNF4A, HNRNPA1, HNRNPA2B1, HNRNPDL, HSP90AB1, IGF2R, IL2, ILF3, ITGA6, ITGA8, LBP, LDHA, LEPR, LRP8, LTF, MAPK8, MAPK8IP1, MIF, NPM1, NPY, NRG1, NTRK1, OSBPL1A,…	88
Gene Expression	Transcription	8,33E-04		-0,587	ADNP, AGR2, AMPH, APP, ATAD2, BCL2L1, BEND5, BLM, C3, CALCR, CAVIN4, CDK5R1, CDKN2C, CHD3, CREB3L2, CUX2, ELF2, ELF5, ELL3, EPHB2, EPN2, FAS, FSTL3, GSC, HIRA, HMGB1, HNF4A, HNRNPA1, HNRNPA2B1, HNRNPU, HOXB3, IGSF1, IL2, ILF3, ITGA6, KCNQ1, KDM5B, KLF1, L3MBTL2, LEPR, LHX2, LPIN2, LRP8, MAPK8, MAPK8IP1, MATR3, MIF, MITF, MXD3, MYADM, MYBBP1A, NDP, NPM1, NRG1, PDLIM1, PELP1, PF4, PHF14, PINK1, PLA…	87
Cellular Development, Cellular Growth and Proliferation	Cell proliferation of tumor cell lines	1,17E-07		-0,241	ABCB1, ACAT1, ACLY, ADAMTS5, AHSG, ANXA6, APP, ATAD2, BCL2L1, BIRC7, CACYBP, CARD10, CDK5R1, CDKN2C, CDKN2D, CEACAM1, CHEK1, CIP2A, CLIP1, CMIP, CUL5, DEFB1, EIF3A, ELF2, ELF5, EMP1, FAS, FSTL3, GCNT3, GPC5, GSTM1, HMGB1, HNF4A, HNRNPA1, HNRNPA2B1, HOXB3, IGF2R, IL2, ILF3, ITGA6, LCP1, LDHA, MAP1LC3A, MAPK8, MIF, MITF, MYBBP1A, NPM1, NPY, NRG1, NTRK1, PELP1, PHC1, PLAC8, PPARGC1A, PRKCA, PTCH1, P…	85
Tissue Morphology	Quantity of cells	8,25E-06		-0,873	ABCB1, ACAT1, ADNP, AGR2, APP, ATP8A2, BCL2A1, BCL2L1, BLM, C3, CALCR, CCL19, CCL28, CD247, CDK5R1, CDKN2C, CDKN2D, CREB3L2, CUX2, CXCR5, DKC1, EFNA3, ELF5, EYA2, FAS, FGF18, FSTL3, FTO, GIMAP1, GNLY, HCST, HMGB1, HNF4A, HOXB3, IGF2R, IL2, IL37, ITGA6, KIF5C, LEPR, LHX2, MAP3K8, MAPK8, MIF, MITF, NDP, NPM1, NPY, NRG1, NT5E, NTRK1, PCDH17, PCSK2, PF4, PHC1, PHYH, PI3, PLAC8, PLP1, PPARGC1A, PRSS12…	84
Cellular Assembly and Organization, Cellular Function and Maintenance	Organization of cytoplasm	1,75E-06		-0,704	ADGRB1, ADNP, APP, ARHGAP17, ARPC3, ATP13A2, ATP8A2, C2CD3, C3, CAMK1D, CCL19, CDH2, CDK2AP2, CDK5R1, CHD3, CHEK1, CLIP1, CLIP3, CRIP1, CUX2, DDAH1, EFNA3, EPHB2, FAS, FGD3, FGD4, FTO, GPM6A, GSTM1, HMGB1, HNF4A, IL2, ITGA6, ITGA8, KIF5C, LCP1, LHX2, LRP8, LTF, MAPK8, MAPK8IP1, NPY, NRG1, NTRK1, PDGFD, PEX11A, PINK1, PLEKHG4, PPARGC1A, PRKCA, PRSS12, PTPRE, RAE1, RAN, RANBP1, RELN, RGS14, ROBO2, …	79
Cellular Function and Maintenance	Cellular homeostasis	4,13E-06		-0,272	ACLY, ACSL1, ANXA6, APP, ATP13A2, ATP2C2, ATP6V0A2, ATP6V0A4, ATP6V1B1, BCAT2, BCL2A1, BCL2L1, BLM, C3, CALCR, CCL19, CCL28, CD247, CDK5R1, CDKN2D, CEACAM1, CHEK1, CIP2A, CXCR5, DEFB1, EPHB2, EYA2, FAS, FFAR2, GIMAP1, GNLY, GPD2, HMGB1, HNF4A, IGF2R, IL2, KCNQ1, KIF5C, LDHA, LEPR, LTF, MAP1LC3A, MAPK8, MAPK8IP1, MIF, MITF, MYADM, NPPC, NPY, NRG1, NT5E, PF4, PINK1, PLP1, PPARGC1A, PRKCA, PTCH1, PY…	79
Cancer, Organismal Injury and Abnormalities	Breast or pancreatic cancer	1,35E-08		1,912	ABCB1, ADAM23, ADAMTS5, ADCY2, AGR2, AMPH, APP, ATAD2, ATP2C2, ATP6V1B1, BCL2L1, C2, C3, CALM1 (includes others), CCL19, CDH2, CDK2AP2, CDK5R1, CDKN2C, CFB, CHEK1, CIP2A, COCH, COL11A1, EIF3A, ELOVL6, EPHB2, EYA2, FAS, FCGBP, FGF18, FSTL3, FTO, GCNT3, GPAT4, GPATCH4, GSTM1, HMGB1, HNRNPA1, HNRNPM, HSP90AB1, ILF3, KLK10, LBP, LEPR, LMO7, LRP8, LTF, MAP3K8, MAPK8IP1, MYBBP1A, NT5E, NTRK1, PCSK2, PE…	77
Cell Death and Survival	Cell death of tumor cell lines	3,04E-06		0,644	ABCB1, ADNP, AGR2, APP, ATAD2, ATP13A2, BCL2A1, BCL2L1, BIRC7, BLM, CD247, CDK5R1, CDKN2C, CDKN2D, CEACAM1, CHEK1, CREB3L2, DEFB1, ELF5, EPHB2, FAS, GNLY, GPM6A, GSTM1, HCST, HNF4A, HNRNPA1, HSP90AB1, IGF2R, IL2, ITGA6, LEPR, MAPK8, MAPK8IP1, MAPKAP1, MIF, MITF, MYBBP1A, NPM1, NPY, NRG1, NT5E, NTRK1, PELP1, PI3, PINK1, PPARGC1A, PRKCA, PTMA, PTPRE, RBM4B, REST, RPS3, S100A8, SEMA3A, SFRP1, SLC39A…	77
Infectious Diseases	Viral Infection	1,99E-05	Decreased	-2,315	ABCB1, ACSL1, ADAMTS5, AMPH, ANXA6, APP, ARPC3, ATP6V0A4, BCL2L1, C2, C3, CAMK1D, CD247, CEACAM1, CEACAM8, CLIP1, CLIP3, CUL5, DCBLD1, DEFB1, EIF3A, EPHB2, EPN2, FAS, GPD2, HIRA, HMGB1, HNF4A, HNRNPDL, HNRNPM, HNRNPU, HSP90AB1, IGF2R, IL2, ILF3, LTF, MAP1LC3A, MIF, MKRN2, NPM1, NRG1, NUP155, PCSK5, PDE11A, PF4, PI3, PIK3R4, PINK1, PPARGC1A, PRKCA, PYGL, RAE1, RAN, RANBP1, RTN2, S100A8, SEPT8, SLC…	74
Cell Death and Survival	Cell survival	1,72E-06		0,828	ABCB1, ACLY, ADNP, AGR2, APP, ATP13A2, BCL2A1, BCL2L1, BIRC7, BLM, C3, CALCR, CARD10, CCNI, CDH2, CDK5R1, CDKN2D, CEACAM1, CHEK1, COCH, EFNA3, EIF3A, EMP1, EPHB2, FAS, FGF18, GIMAP1, GNLY, GSTM1, HMGB1, HNRNPU, HSP90AB1, IGF2R, IL2, ITGA6, LDHA, LEPR, LTF, MAP3K8, MAPK8, MAPK8IP1, MIF, MITF, MXD3, NDP, NPY5R, NRG1, NTRK1, PF4, PINK1, PLAC8, PLP1, PPARGC1A, PRKCA, PTCH1, PTPRE, REST, RPL35A, S100A…	73
Cellular Assembly and Organization, Cellular Function and Maintenance	Organization of cytoskeleton	3,01E-06		-0,704	ADGRB1, ADNP, APP, ARHGAP17, ARPC3, ATP8A2, C2CD3, C3, CAMK1D, CCL19, CDH2, CDK2AP2, CDK5R1, CHD3, CHEK1, CLIP1, CLIP3, CRIP1, CUX2, DDAH1, EFNA3, EPHB2, FAS, FGD3, FGD4, FTO, GPM6A, GSTM1, HMGB1, HNF4A, IL2, ITGA6, ITGA8, KIF5C, LCP1, LHX2, LRP8, LTF, MAPK8, MAPK8IP1, NPY, NRG1, NTRK1, PDGFD, PLEKHG4, PRKCA, PRSS12, PTPRE, RAE1, RAN, RANBP1, RELN, RGS14, ROBO2, RPS3, S100A8, SDC3, SEMA3A, SEPT11…	73
Cancer, Organismal Injury and Abnormalities, Reproductive System Disease	Breast or ovarian cancer	6,07E-08			ABCB1, ADAM23, ADAMTS5, ADCY2, AGR2, AMPH, APP, ATAD2, ATP2C2, ATP6V1B1, BCL2L1, C2, C3, CALM1 (includes others), CCL19, CDH2, CDK2AP2, CDKN2C, CFB, CHEK1, CIP2A, COCH, COL11A1, EIF3A, ELOVL6, EYA2, FAS, FCGBP, FGF18, FSTL3, FTO, GPAT4, GPATCH4, GSTM1, HNRNPA1, HNRNPM, HSP90AB1, ILF3, KLK10, LBP, LEPR, LMO7, LRP8, LTF, MAP3K8, MAPK8IP1, MYBBP1A, NT5E, NTRK1, PELP1, PF4, PNPLA4, PRKCA, PTPRE, RANB…	71
Cell Death and Survival	Cell viability	1,48E-06		0,813	ABCB1, ACLY, ADNP, AGR2, APP, ATP13A2, BCL2A1, BCL2L1, BIRC7, BLM, C3, CALCR, CARD10, CCNI, CDH2, CDK5R1, CDKN2D, CEACAM1, CHEK1, COCH, EFNA3, EIF3A, EPHB2, FAS, FGF18, GIMAP1, GNLY, GSTM1, HMGB1, HNRNPU, HSP90AB1, IGF2R, IL2, ITGA6, LDHA, LEPR, LTF, MAP3K8, MAPK8, MAPK8IP1, MIF, MITF, MXD3, NDP, NPY5R, NRG1, NTRK1, PF4, PINK1, PLAC8, PLP1, PPARGC1A, PRKCA, PTCH1, PTPRE, REST, RPL35A, S100A8, SEL…	70
Molecular Transport	Transport of molecule	6,19E-04		-1,507	ABCB1, ACAT1, ACLY, ACSL1, ANXA6, APP, ATP13A2, ATP2C2, ATP6V0A2, ATP6V0A4, ATP6V1B1, ATP8A2, C3, CALCR, CDK5R1, CLIP3, CNKSR3, CREB3L2, FAS, FHL1, HNRNPA2B1, IGF2R, IL2, KCNQ1, KIF5C, LBP, LTF, MAOB, MAPK8IP1, MAPKAP1, MIF, MYBBP1A, NPM1, NPPC, NPY, NPY5R, NRG1, NTRK1, NUP155, OLFM2, OSBPL1A, PCSK2, PINK1, PNKD, PPARGC1A, PRKCA, PTCH1, RAE1, RAN, RELN, RGS14, RTN2, S100A8, SAA1, SLC26A4, SLC2A8,…	69
Cancer, Gastrointestinal Disease, Organismal Injury and Abnormalities	Gastrointestinal neoplasia	8,61E-05		-0,225	ABCB1, ACLY, AGR2, AJAP1, BCL2L1, CA1, CACYBP, CDH2, CDKN2C, CEACAM1, CIP2A, COCH, COL11A1, CRIP1, CRYBG1, EIF3A, EMP1, EPHB2, FAS, FGD4, FSTL3, GLTP, GSTM1, HMGB1, HNF4A, HNRNPA2B1, HSP90AB1, IGF2R, IL2, ITGA6, ITGA8, LDHA, LEPR, LRP8, LTF, MAPK8, MAPK8IP1, MIF, NPM1, NRG1, NTRK1, OSBPL1A, PDGFD, PDLIM1, PRKCA, PRSS23, PTCH1, PTMA, PTPRE, RAE1, RAN, RASAL1, ROBO2, SGK2, SLC7A5, SLPI, TAGLN2, TCF…	68
Cancer, Organismal Injury and Abnormalities, Reproductive System Disease	Mammary tumor	8,10E-07		0,194	ABCB1, ADAM23, ADAMTS5, ADCY2, AGR2, AMPH, APP, ATAD2, ATP2C2, BCL2L1, C2, C3, CALM1 (includes others), CCL19, CDH2, CDK2AP2, CDKN2C, CHEK1, CIP2A, COCH, EIF3A, ELOVL6, FAS, FCGBP, FSTL3, FTO, GPAT4, GPATCH4, GSTM1, HNRNPA1, HNRNPM, HSP90AB1, IL2, ILF3, LBP, LEPR, LMO7, LTF, MAP3K8, MAPK8IP1, MIF, MYBBP1A, NRG1, NT5E, NTRK1, PELP1, PF4, PNPLA4, PRKCA, PTPRE, RANBP1, RBM4B, RPS3, RPS4X, S100A8, SC…	67
Cell Death and Survival	Apoptosis of tumor cell lines	3,94E-06		0,599	ABCB1, APP, ATAD2, BCL2A1, BCL2L1, BIRC7, BLM, CDK5R1, CDKN2C, CDKN2D, CEACAM1, CHEK1, DEFB1, ELF5, EPHB2, FAS, GNLY, HCST, HNF4A, HNRNPA1, HSP90AB1, IGF2R, IL2, LEPR, MAPK8, MAPK8IP1, MAPKAP1, MIF, MITF, MYBBP1A, NPM1, NRG1, NTRK1, PELP1, PI3, PINK1, PPARGC1A, PRKCA, PTMA, PTPRE, RBM4B, REST, RPS3, S100A8, SEMA3A, SFRP1, SLC39A6, SLPI, SNW1, SOX4, SPOCK1, SSRP1, STAP2, TAGLN2, TCERG1, TFF3, TGFB…	64
Cancer, Gastrointestinal Disease, Organismal Injury and Abnormalities	Gastrointestinal tract cancer	8,94E-05		0,317	ABCB1, ACLY, AGR2, AJAP1, BCL2L1, CA1, CACYBP, CDH2, CDKN2C, CEACAM1, CIP2A, COCH, COL11A1, CRIP1, CRYBG1, EIF3A, EMP1, EPHB2, FAS, FGD4, FSTL3, GSTM1, HMGB1, HNF4A, HNRNPA2B1, HSP90AB1, IGF2R, IL2, ITGA6, ITGA8, LDHA, LRP8, LTF, MAPK8, MAPK8IP1, MIF, NPM1, NRG1, NTRK1, OSBPL1A, PDGFD, PDLIM1, PRSS23, PTCH1, PTMA, PTPRE, RAE1, RAN, RASAL1, ROBO2, SGK2, SLC7A5, SLPI, TAGLN2, TCF21, TFF3, TIAM1, TL…	64
Cellular Assembly and Organization, Cellular Function and Maintenance	Microtubule dynamics	7,55E-06		-0,663	ADGRB1, ADNP, APP, ARPC3, ATP8A2, C2CD3, C3, CAMK1D, CCL19, CDH2, CDK2AP2, CDK5R1, CHEK1, CLIP1, CLIP3, CRIP1, CUX2, DDAH1, EFNA3, EPHB2, FAS, FGD3, FGD4, FTO, GPM6A, GSTM1, HMGB1, HNF4A, ITGA6, ITGA8, KIF5C, LCP1, LHX2, LRP8, LTF, MAPK8, MAPK8IP1, NPY, NRG1, NTRK1, PLEKHG4, PRKCA, PRSS12, PTPRE, RAN, RANBP1, RELN, ROBO2, RPS3, SDC3, SEMA3A, SEPT11, SGK2, SLC9A3R1, SMPD2, SRGAP2, SSRP1, TGFBR1, T…	63
Neurological Disease	Movement Disorders	3,74E-07		-0,748	ABCB1, ACAT1, ADAM23, ADCY2, APP, ATP13A2, ATP8A2, BCL2L1, C3, CA1, CA5B, CDH2, CDK5R1, CDKN2C, CHAF1B, COCH, CPNE5, EPHB2, FAS, HNRNPDL, HNRNPU, IGF2R, ILF3, KCNQ1, LDHA, LRP8, LTF, MAOB, MAPK8IP1, NPM1, NPY, PDE11A, PDLIM1, PHYH, PINK1, PLP1, PNKD, PPARGC1A, PTBP2, PTPRE, RAN, RANBP1, RASL12, RELN, RGS14, RPL31, RPS4X, RTN2, S100A10, SCUBE2, SELE, SIX1, SLC26A4, SOX4, SUN2, SYNPR, TCERG1, TMEFF…	60
Cancer, Organismal Injury and Abnormalities, Reproductive System Disease	Breast cancer	1,57E-06			ABCB1, ADAM23, ADAMTS5, ADCY2, AGR2, AMPH, APP, ATAD2, ATP2C2, BCL2L1, C2, C3, CALM1 (includes others), CCL19, CDH2, CDK2AP2, CDKN2C, CHEK1, CIP2A, COCH, EIF3A, ELOVL6, FAS, FCGBP, FSTL3, FTO, GPAT4, GPATCH4, GSTM1, HNRNPA1, HNRNPM, HSP90AB1, ILF3, LBP, LEPR, LMO7, LTF, MAP3K8, MAPK8IP1, MYBBP1A, NT5E, NTRK1, PELP1, PF4, PNPLA4, PRKCA, PTPRE, RANBP1, RBM4B, RPS3, SCUBE2, SFRP1, SLC39A6, SLC9A3R1,…	60
Cancer, Organismal Injury and Abnormalities	Urogenital cancer	1,62E-03		0,513	ABCB1, ACAT1, ADAMTS5, AGR2, ATP6V1B1, BCL2L1, BIRC7, C3, CDH2, CDKN2C, CFB, CHEK1, COCH, COL11A1, DEFB1, DHRS7, EIF3A, EPHB2, EYA2, FAS, FGD4, FGF18, FHL1, GPM6A, GSTM1, HSP90AB1, IL2, ITGA6, KLK10, LCP1, LRP8, LTF, MAPK8IP1, MITF, NPM1, NT5E, PDE11A, PF4, PI3, PLP1, PTCH1, PTPRE, RAE1, RASAL1, RASL12, RCBTB2, REST, RNF181, S100A8, SAA1, SFRP1, SLC7A5, SLPI, SOX4, SSRP1, TCF21, TFF3, TGFBR1, TRA…	60
Nervous System Development and Function	Morphology of nervous system	5,28E-08			ADGRB1, APP, ATP13A2, ATP8A2, BCL2L1, C3, CD247, CDH2, CDK5R1, CDKN2C, CLIP3, CUX2, EFNA3, EPHB2, FGD4, FTO, GPR143, GSC, HIRA, HNRNPA2B1, IGF2R, IL2, IL37, ITGA6, KCNQ1, KIF5C, LEPR, LHX2, LRP8, MAOB, MAPK8IP1, MARCKSL1, MIF, MITF, NDP, NRG1, NTRK1, PHYH, PINK1, PLP1, PPARGC1A, PRSS12, PTCH1, RELN, REST, ROBO2, SDC3, SEMA3A, SEPT11, SIX1, SLC26A4, SLC2A8, SOX4, SUN2, TIAM1, TNFRSF1B, TRA, TTPA, …	59
Connective Tissue Disorders, Inflammatory Disease, Organismal Injury and Abnormalities, Skeletal and Muscular Disorders	Rheumatic Disease	1,84E-06		0,141	ABCB1, ACLY, ADAMTS5, AHSG, BCL2L1, C2, C3, CCL19, CD247, CDK2AP2, CDKN2D, CEACAM1, CEACAM8, CFB, COCH, COL11A1, COL4A5, COL9A3, CXCR5, ERH, FAS, GAR1, GNB2, GNLY, HMGB1, HNRNPA1, IL2, LBP, LCP1, LEPR, LTF, MAOB, MAP3K8, MAPK8, MIF, NPY, NTRK1, PDE11A, PDGFD, PHC1, PRKCA, PTMA, PTPRE, RANBP1, RPL31, RPS3, S100A10, S100A8, SAA1, SDC3, SEC14L3, SELE, SERPINB13, TALDO1, TBC1D10C, TNFRSF11B, TNFRSF1B…	58
Cancer, Organismal Injury and Abnormalities	Adenocarcinoma	1,91E-04		-0,784	ABCB1, ACAT1, ADAM23, AGR2, AJAP1, AMPH, BCL2L1, C3, CDH2, CDK5R1, CDKN2C, CFB, COCH, COL11A1, DEFB1, EPHB2, FAS, FCGBP, FGF18, GPM6A, GSTM1, HMGB1, HNF4A, HSP90AB1, IL2, KLK10, LDHA, LEPR, LMO7, LRP8, MAPK8IP1, MAPKAP1, MITF, NPM1, NPY, NRG1, NTRK1, OSBPL1A, PCSK2, PF4, PI3, PLP1, PTCH1, PTPRE, RBM4B, RPL9, SAA1, SFRP1, SLC7A5, SLPI, SOX4, TCF21, TFF3, TGFBR1, TNK2, TNS4, TRA2A, WFDC2	58
Cancer, Organismal Injury and Abnormalities, Reproductive System Disease	Tumorigenesis of genital organ	1,49E-03		-0,144	ABCB1, ADAMTS5, AGR2, ATP6V1B1, BCL2L1, C3, CDH2, CDKN2C, CDKN2D, CFB, CHEK1, COCH, COL11A1, DEFB1, DHRS7, EIF3A, EPHB2, EYA2, FAS, FGD4, FGF18, FHL1, GPM6A, GSTM1, HSP90AB1, IL2, ITGA6, KLK10, LRP8, LTF, MAPK8IP1, MEGF9, NPM1, NRG1, NT5E, PDE11A, PF4, PI3, PLP1, PTCH1, RASL12, RCBTB2, RNF181, RPL9, S100A8, SAA1, SFRP1, SLC7A5, SLPI, SOX4, SSRP1, TCF21, TFF3, TGFBR1, THOC1, TMC8, TRA2A, WFDC2	58
Cancer, Organismal Injury and Abnormalities, Reproductive System Disease	Genital tumor	1,66E-03		-0,144	ABCB1, ADAMTS5, AGR2, ATP6V1B1, BCL2L1, C3, CDH2, CDKN2C, CDKN2D, CFB, CHEK1, COCH, COL11A1, DEFB1, DHRS7, EIF3A, EPHB2, EYA2, FAS, FGD4, FGF18, FHL1, GPM6A, GSTM1, HSP90AB1, IL2, ITGA6, KLK10, LRP8, LTF, MAPK8IP1, MEGF9, NPM1, NRG1, NT5E, PDE11A, PF4, PI3, PLP1, PTCH1, RASL12, RCBTB2, RNF181, RPL9, S100A8, SAA1, SFRP1, SLC7A5, SLPI, SOX4, SSRP1, TCF21, TFF3, TGFBR1, THOC1, TMC8, TRA2A, WFDC2	58
Cardiovascular System Development and Function	Development of vasculature	8,32E-06		-0,172	ADGRB1, APP, ATP6V0A2, C3, CCL28, CDH2, CDKN2D, CEACAM1, CFB, CUL5, DDAH1, EFNA3, EMP1, EPHB2, EPN2, FAS, FGF18, GSC, GSTM1, HIRA, HMGB1, HOXB3, IGF2R, IL2, KLF1, LDHA, LEMD3, LEPR, LRP8, LUZP1, MAPK8, NDP, NPPC, NPY, NRG1, NTRK1, PCSK5, PDGFD, PF4, PI3, PPARGC1A, PRKCA, PTCH1, S100A8, SAA1, SELE, SEMA3A, SFRP1, SFTPC, SLPI, SOX4, TCF21, TGFBR1, TNFRSF11B, TNFRSF1B, VEGFD, ZC3H13	57
Organismal Development	Morphology of head	2,23E-06			APP, ATP8A2, C2CD3, C3, CD247, CDK5R1, CDKN2C, CREB3L2, CUX2, EFNA3, ENTPD2, EPHB2, FTO, GPR143, GSC, HIRA, HOXB3, IGF2R, IGSF1, IL2, ITGA6, ITGA8, KCNQ1, KIF5C, LEPR, LHX2, LMO7, LRP8, MAPK8, MAPK8IP1, MARCKSL1, MIF, MITF, NDP, NPPC, NTRK1, PHC1, PHC2, PHYH, PINK1, PPARGC1A, PTCH1, RELN, REST, ROBO2, SEMA3A, SFRP1, SIX1, SLC26A4, SLC2A8, SOX4, SOX5, SUN2, TNFRSF11B, TNFRSF1B, TTPA	56
Cancer, Organismal Injury and Abnormalities	Tumorigenesis of epithelial neoplasm	1,67E-04		-0,083	ABCB1, ACAT1, ACLY, BCL2L1, C3, CA1, CACYBP, CDH2, CDKN2C, CEACAM1, COCH, COL11A1, DEFB1, DKC1, FAS, FGF18, GLTP, GSTM1, HMGB1, HNF4A, HSP90AB1, IGF2R, IL2, ITGA6, KLK10, LDHA, LEPR, LMO7, LRP8, MAPK8, MAPK8IP1, MIF, MITF, NPM1, NTRK1, OSBPL1A, PCSK2, PF4, PISD, PRKCA, PTCH1, PTMA, PTPRE, RELN, S100A8, SFRP1, SLC7A5, SLPI, SOX4, TNK2, TPR, TRA2A, TTC3, WDHD1, WFDC2	55
Behavior	Behavior	1,52E-05		-0,808	ACAT1, ADGRL1, ADNP, AGRP, AMPH, APP, ASL, ATP13A2, ATP8A2, BCAT2, C3, CDK5R1, CUX2, EFNA3, EPHB2, FTO, GPD2, GSC, HMGB1, IGF2R, IL2, ILF3, ITGA8, KCNQ1, LEPR, LRP8, MAOB, MAPK8, MAPK8IP1, MIF, NPY, NPY5R, NRG1, NT5E, NTRK1, PCDH17, PDE11A, PHYH, PINK1, PPARGC1A, PRKCA, PRSS12, RELN, RGS14, ROBO2, S100A10, SDC3, SELE, SEMA3A, SFTPC, SLC26A4, TNFRSF11B, TNFRSF1B, VEGFD	54
Organismal Development	Development of genitourinary system	1,57E-05		-1,056	AGRP, AHSG, AMPH, BCAT2, BCL2L1, BLM, CDKN2C, CHEK1, CIP2A, CLIP1, COL4A5, COL9A3, EIF2S2, FSTL3, FTO, GCNT3, GPAT4, GPD2, HIRA, HSP90AB1, HUNK, IGF2R, ITGA6, ITGA8, KDM5B, LEPR, LRP8, MAPK8, MEI1, MIF, NDP, NPPC, NRG1, NTRK1, PCSK5, PELP1, PHC2, PPARGC1A, PTCH1, RANBP1, RDH16, ROBO2, SFRP1, SIX1, SOX4, SPAG11B, SUN5, TCF21, TGFBR1, TTPA, WFDC2, WNT2B, XRN2, ZC3HC1	54
Cell Cycle	Cell cycle progression	3,28E-05		-1,719	ADCY2, AHSG, APP, BCL2A1, BCL2L1, BLM, CARD10, CCNI, CDK5R1, CDKN2C, CDKN2D, CEACAM1, CHEK1, CLIP1, CUL5, EMP1, FAS, HMGB1, HNF4A, HNRNPU, HOXB3, IL2, IRS4, KDM5B, LEMD3, MAPK8, MIF, MITF, MYBBP1A, NPM1, NRG1, NTRK1, PELP1, PF4, PHC1, PI3, PLAC8, POGZ, PRKCA, PTCH1, PTMA, RAE1, RAN, REST, RGS14, RPS3, SDC3, SLC9A3R1, SSRP1, TCERG1, TGFBR1, TPR, VEGFD, ZC3HC1	54
Embryonic Development, Organismal Development	Development of body trunk	1,60E-04		-0,734	AGRP, ASL, BCL2L1, C2CD3, CDKN2C, CDKN2D, CHEK1, COL11A1, COL9A3, CRIP1, CUL5, CXCR5, EMP1, FAS, FGF18, FHL1, GPAT4, GSC, HIRA, HOXB3, HUNK, IGF2R, IL2, ITGA6, ITGA8, KDM5B, KLF1, LBP, LEPR, LUZP1, MAPK8, MARCKSL1, MATR3, NPPC, NRG1, PCSK5, PELP1, PHC1, PHF14, PPARGC1A, PRKCA, PTCH1, REST, SELE, SFRP1, SFTPC, SIX1, SOX4, TCF21, TGFBR1, TNFRSF11B, TNFRSF1B, TRA, UPB1	54
Cellular Movement	Invasion of cells	9,19E-07		-0,248	ACAT1, AGR2, AHSG, AJAP1, APP, ATP6V0A4, BCL2L1, BIRC7, CARD10, CCL19, CDH2, CDK5R1, CEACAM1, COL11A1, EIF3A, EPHB2, EYA2, FAS, FGD4, HMGB1, HNRNPA2B1, HSP90AB1, ILF3, ITGA6, LCP1, LDHA, LTF, MAPK8, MIF, MITF, NPM1, NRG1, NTRK1, PDGFD, PDLIM1, PRKCA, RAB25, RELN, S100A10, S100A8, SAA1, SEPT11, SFRP1, SLC9A3R1, SNAP23, SOX4, TAGLN2, TFF3, TGFBR1, TIAM1, TNK2, TNS4, VEGFD	53
Embryonic Development, Organismal Development	Development of body axis	3,00E-04		-0,323	ADGRB1, APP, ATP6V1B1, ATP8A2, BCL2L1, C2CD3, CD247, CDH2, CDK5R1, COL11A1, CRISPLD1, EFNA3, EPHB2, FTO, GPR143, GSC, HIRA, HOXB3, IL2, ITGA6, ITGA8, KCNQ1, LHX2, LMO7, LRP8, MAPK8, MARCKSL1, MITF, NDP, NPM1, NPY, NRG1, NTRK1, PCSK5, PHC1, PHC2, PTCH1, RELN, REST, ROBO2, SEMA3A, SFRP1, SIX1, SOX4, SUN2, TCF21, TGFBR1, TNFRSF11B, TNFRSF1B, TTC21B, TTPA, VEGFD, WNT2B	53
Cancer, Gastrointestinal Disease, Organismal Injury and Abnormalities	Intestinal tumor	8,25E-04		0,314	ABCB1, ACLY, AGR2, BCL2L1, CA1, CACYBP, CDH2, CDKN2C, CEACAM1, COCH, CRIP1, CRYBG1, EMP1, EPHB2, FAS, FSTL3, GLTP, GSTM1, HMGB1, HNF4A, HNRNPA2B1, HSP90AB1, IL2, ITGA6, LDHA, LEPR, LRP8, LTF, MAPK8, MAPK8IP1, MIF, NRG1, NTRK1, OSBPL1A, PDLIM1, PRKCA, PRSS23, PTCH1, PTMA, RAE1, SGK2, SLC7A5, SLPI, TAGLN2, TCF21, TFF3, THOC1, TLE6, TNFRSF11B, TNS4, TTC38, USP53, WDHD1	53
Cellular Movement	Cell movement of tumor cell lines	4,61E-06		-0,335	AGR2, AJAP1, APP, BCL2L1, C3, CARD10, CCL19, CDH2, CEACAM1, CIP2A, CLIP1, COL11A1, EIF3A, EPHB2, EYA2, FGD4, GNB2, HMGB1, HNRNPA2B1, IL2, ILF3, ITGA6, LCP1, LDHA, LEPR, LMO7, MAP3K8, MAPK8, MIF, MITF, MYADM, NPM1, NRG1, NT5E, PDLIM1, PRKCA, REST, S100A10, S100A8, SDC3, SELE, SEMA3A, SLC9A3R1, STAP2, TAGLN2, TGFBR1, TIAM1, TLE6, TNFRSF11B, TNK2, TPPP, VEGFD	52
Immunological Disease	Systemic autoimmune syndrome	5,55E-06		-0,673	ABCB1, ACLY, AHSG, BCL2L1, C2, C3, CA1, CALCR, CCL19, CD247, CDKN2D, CEACAM1, CEACAM8, CFB, COCH, COL4A5, CXCR5, ERH, FAS, GAR1, GIMAP1, GNB2, GNLY, HCST, HMGB1, HNRNPA1, IL2, LBP, LCP1, LTF, MAOB, MAP3K8, MIF, MITF, NT5E, NTRK1, PRKCA, PTMA, PTPRE, RPL31, RPS3, S100A10, S100A8, SAA1, SDC3, SEC14L3, SELE, TALDO1, TBC1D10C, TNFRSF11B, TNFRSF1B, TRA	52
Embryonic Development, Organismal Development	Development of head	9,67E-05		-0,323	ADGRB1, APP, ATP6V1B1, ATP8A2, BCL2L1, C2CD3, CD247, CDH2, CDK5R1, COL11A1, CRISPLD1, EFNA3, EPHB2, FTO, GPR143, GSC, HIRA, HOXB3, IL2, ITGA6, ITGA8, KCNQ1, LHX2, LMO7, LRP8, MAPK8, MARCKSL1, MITF, NDP, NPM1, NPY, NRG1, NTRK1, PCSK5, PHC1, PHC2, PTCH1, RELN, REST, ROBO2, SEMA3A, SIX1, SOX4, SUN2, TCF21, TGFBR1, TNFRSF11B, TNFRSF1B, TTC21B, TTPA, VEGFD, WNT2B	52
Cancer, Organismal Injury and Abnormalities, Reproductive System Disease	Genital tract cancer	6,14E-04			ABCB1, ADAMTS5, AGR2, ATP6V1B1, BCL2L1, C3, CDH2, CDKN2C, CFB, CHEK1, COCH, COL11A1, DEFB1, DHRS7, EIF3A, EPHB2, EYA2, FAS, FGD4, FGF18, FHL1, GPM6A, GSTM1, HSP90AB1, IL2, ITGA6, KLK10, LRP8, LTF, MAPK8IP1, NPM1, NT5E, PDE11A, PF4, PI3, PLP1, PTCH1, RASL12, RCBTB2, RNF181, S100A8, SAA1, SFRP1, SLC7A5, SLPI, SOX4, SSRP1, TCF21, TFF3, TGFBR1, TRA2A, WFDC2	52
Cancer, Organismal Injury and Abnormalities	Pelvic cancer	7,23E-04		-0,106	ABCB1, ADAMTS5, AGR2, ATP6V1B1, BCL2L1, BIRC7, C3, CDH2, CDKN2C, CFB, CHEK1, COCH, COL11A1, DEFB1, EIF3A, EPHB2, EYA2, FAS, FGF18, FHL1, GPM6A, GSTM1, HSP90AB1, IL2, ITGA6, KLK10, LRP8, LTF, MAPK8IP1, NPM1, NT5E, NTRK1, PDE11A, PF4, PI3, PLP1, PTCH1, RASAL1, RASL12, RCBTB2, S100A8, SAA1, SFRP1, SLC7A5, SLPI, SOX4, SSRP1, TCF21, TFF3, TGFBR1, TRA2A, WFDC2	52
Cellular Movement, Immune Cell Trafficking	Leukocyte migration	2,21E-06		1,604	APP, BLM, C2, C3, CAMK1D, CCL19, CCL28, CD247, CEACAM1, CFB, COCH, CXCR5, DEFB1, FAS, GNLY, HMGB1, IL2, IL37, ITGA6, LBP, LCP1, LTF, MAP3K8, MAPK8, MAT1A, MIF, MYADM, NPM1, NPY, NT5E, PF4, PLP1, PRKCA, PTMA, S100A10, S100A8, SAA1, SELE, SEMA3A, SFRP1, SFTPC, SLPI, SMPD2, STAP2, TGFBR1, TIAM1, TNFRSF11B, TNFRSF1B, TNK2, TRA, VEGFD	51
Cancer, Gastrointestinal Disease, Organismal Injury and Abnormalities	Large intestine neoplasm	1,43E-03		1,069	ABCB1, ACLY, AGR2, BCL2L1, CA1, CACYBP, CDH2, CDKN2C, CEACAM1, COCH, CRIP1, CRYBG1, EMP1, EPHB2, FAS, FSTL3, GLTP, GSTM1, HMGB1, HNF4A, HNRNPA2B1, HSP90AB1, IL2, ITGA6, LDHA, LEPR, LRP8, LTF, MAPK8, MAPK8IP1, MIF, NRG1, NTRK1, OSBPL1A, PDLIM1, PRSS23, PTMA, RAE1, SGK2, SLC7A5, SLPI, TAGLN2, TCF21, TFF3, THOC1, TLE6, TNFRSF11B, TNS4, TTC38, USP53, WDHD1	51
Organismal Development, Organismal Injury and Abnormalities	Abnormal morphology of head	7,39E-06			APP, ATP8A2, C2CD3, C3, CD247, CDK5R1, CDKN2C, CREB3L2, CUX2, EFNA3, ENTPD2, EPHB2, FTO, GPR143, GSC, HIRA, HOXB3, IGSF1, IL2, ITGA6, ITGA8, KCNQ1, LHX2, LMO7, LRP8, MAPK8, MAPK8IP1, MARCKSL1, MIF, MITF, NDP, PHC1, PHC2, PHYH, PINK1, PPARGC1A, PTCH1, REST, ROBO2, SEMA3A, SFRP1, SIX1, SLC26A4, SLC2A8, SOX4, SOX5, SUN2, TNFRSF11B, TNFRSF1B, TTPA	50
Connective Tissue Disorders, Inflammatory Disease, Inflammatory Response, Organismal Injury and Abnormalities, Skeletal and Muscular Disorders	Inflammation of joint	7,39E-06		0,820	ABCB1, ACLY, ADAMTS5, AHSG, C2, C3, CCL19, CD247, CDK2AP2, CDKN2D, CFB, COCH, COL11A1, COL4A5, COL9A3, CXCR5, ERH, FAS, GAR1, GNB2, GNLY, HMGB1, HNRNPA1, IL2, LBP, LCP1, LEPR, LTF, MAOB, MAPK8, MIF, NPY, NTRK1, PDE11A, PDGFD, PHC1, PTMA, PTPRE, RPL31, RPS3, S100A10, S100A8, SAA1, SDC3, SEC14L3, SELE, TALDO1, TNFRSF11B, TNFRSF1B, TRA	50
Inflammatory Disease	Chronic inflammatory disorder	1,44E-05		-0,537	ABCB1, ACLY, AHSG, BCL2L1, C2, C3, CA1, CA5B, CCL19, CD247, CDKN2D, CFB, COCH, COL4A5, CXCR5, ERH, FAS, GAR1, GNB2, GNLY, HMGB1, HNRNPA1, IL2, IL37, LBP, LCP1, LEPR, LPIN2, LTF, MAOB, MIF, NTRK1, PDE11A, PDLIM1, PI3, PTMA, PTPRE, RPL31, RPS3, S100A10, S100A8, SAA1, SDC3, SEC14L3, SELE, SLPI, TALDO1, TNFRSF11B, TNFRSF1B, TRA	50
Hereditary Disorder, Organismal Injury and Abnormalities	Autosomal dominant disease	1,72E-03			ACLY, ADNP, APP, BLM, C3, CA1, CALCR, CALM1 (includes others), CFB, COCH, COL11A1, COL9A3, CTNNA3, DIP2B, FAS, FHL1, GPD2, HNF4A, HNRNPA1, HNRNPA2B1, HNRNPDL, HNRNPU, KCNQ1, KIF5C, KLF1, LEMD3, MAPK8IP1, MAT1A, MATR3, MITF, MYOT, PDE11A, PNKD, POGZ, PRKCA, PRSS23, PTBP2, PTCH1, RELN, RPL35A, RPS28, RTN2, SDC3, SEMA3A, SFTPC, SIX1, SLC6A20, SLC9A3R1, SOX5, TGFBR1	50
Cancer, Gastrointestinal Disease, Organismal Injury and Abnormalities	Colorectal neoplasia	1,97E-03		1,069	ABCB1, ACLY, AGR2, BCL2L1, CA1, CACYBP, CDH2, CDKN2C, CEACAM1, CRIP1, CRYBG1, EMP1, EPHB2, FAS, FSTL3, GLTP, GSTM1, HMGB1, HNF4A, HNRNPA2B1, HSP90AB1, IL2, ITGA6, LDHA, LEPR, LRP8, LTF, MAPK8, MAPK8IP1, MIF, NRG1, NTRK1, OSBPL1A, PDLIM1, PRSS23, PTMA, RAE1, SGK2, SLC7A5, SLPI, TAGLN2, TCF21, TFF3, THOC1, TLE6, TNFRSF11B, TNS4, TTC38, USP53, WDHD1	50
Cellular Movement, Hematological System Development and Function, Immune Cell Trafficking	Cell movement of leukocytes	3,13E-07		1,763	APP, BLM, C2, C3, CAMK1D, CCL19, CCL28, CD247, CEACAM1, CFB, CXCR5, DEFB1, FAS, GNLY, HMGB1, IL2, IL37, ITGA6, LBP, LCP1, LTF, MAP3K8, MAT1A, MIF, MYADM, NPM1, NPY, NT5E, PF4, PLP1, PRKCA, PTMA, S100A10, S100A8, SAA1, SELE, SEMA3A, SFRP1, SFTPC, SLPI, SMPD2, STAP2, TGFBR1, TIAM1, TNFRSF11B, TNFRSF1B, TNK2, TRA, VEGFD	49
Cardiovascular System Development and Function, Organismal Development	Angiogenesis	6,84E-05		-0,136	ADGRB1, APP, ATP6V0A2, C3, CCL28, CDH2, CDKN2D, CEACAM1, CFB, CUL5, DDAH1, EFNA3, EMP1, EPHB2, FAS, FGF18, GSTM1, HIRA, HMGB1, HOXB3, IGF2R, IL2, KLF1, LDHA, LEMD3, LEPR, LRP8, LUZP1, MAPK8, NDP, NPPC, NPY, NRG1, NTRK1, PCSK5, PDGFD, PF4, PPARGC1A, PRKCA, PTCH1, S100A8, SAA1, SELE, SEMA3A, SFRP1, SLPI, TGFBR1, VEGFD, ZC3H13	49
Hematological System Development and Function, Tissue Morphology	Quantity of blood cells	4,07E-04		-0,521	ABCB1, ACAT1, AGR2, APP, BCL2A1, BCL2L1, BLM, C3, CCL19, CCL28, CD247, CDKN2C, CXCR5, DKC1, FAS, GIMAP1, GNLY, HCST, HMGB1, HOXB3, IGF2R, IL2, IL37, ITGA6, LEPR, LHX2, MAP3K8, MAPK8, MIF, NPM1, NPY, NTRK1, PF4, PHC1, PI3, PLAC8, PLP1, S100A8, SAA1, SELE, SLC39A10, SLCO1A2, SLPI, SOX4, TGFBR1, TNFRSF11B, TNFRSF13C, TNFRSF1B, TRA	49
Cancer, Gastrointestinal Disease, Organismal Injury and Abnormalities	Intestinal cancer	9,97E-04		0,747	ABCB1, ACLY, AGR2, BCL2L1, CA1, CACYBP, CDH2, CDKN2C, CEACAM1, COCH, CRIP1, CRYBG1, EMP1, EPHB2, FAS, FSTL3, GSTM1, HMGB1, HNF4A, HNRNPA2B1, HSP90AB1, IL2, ITGA6, LDHA, LRP8, LTF, MAPK8, MAPK8IP1, MIF, NRG1, NTRK1, OSBPL1A, PDLIM1, PRSS23, PTCH1, PTMA, RAE1, SGK2, SLC7A5, SLPI, TAGLN2, TCF21, TFF3, TLE6, TNFRSF11B, TNS4, TTC38, USP53, WDHD1	49
Cell-To-Cell Signaling and Interaction	Activation of cells	1,65E-04		0,698	APP, BCL2A1, BCL2L1, C3, CD247, CEACAM1, CXCR5, EIF3A, ENTPD2, EPHB2, FAS, FFAR2, GNLY, GP2, HMGB1, HNF4A, IGF2R, IL2, IL37, LBP, LEPR, LHX2, LTF, MAOB, MAP3K8, MAPK8, MIF, NPM1, NPY, NRG1, NT5E, PDE11A, PF4, PHC1, PLP1, PRKCA, PTPRE, S100A8, SAA1, SELE, SFRP1, SLPI, SMPD2, TBC1D10C, TNFRSF11B, TNFRSF13C, TNFRSF1B, TRA	48
Cancer, Gastrointestinal Disease, Organismal Injury and Abnormalities	Malignant neoplasm of large intestine	1,32E-03		1,069	ABCB1, ACLY, AGR2, BCL2L1, CA1, CACYBP, CDH2, CDKN2C, CEACAM1, COCH, CRIP1, CRYBG1, EMP1, EPHB2, FAS, FSTL3, GSTM1, HMGB1, HNF4A, HNRNPA2B1, HSP90AB1, IL2, ITGA6, LDHA, LRP8, LTF, MAPK8, MAPK8IP1, MIF, NRG1, NTRK1, OSBPL1A, PDLIM1, PRSS23, PTMA, RAE1, SGK2, SLC7A5, SLPI, TAGLN2, TCF21, TFF3, TLE6, TNFRSF11B, TNS4, TTC38, USP53, WDHD1	48
Cancer, Organismal Injury and Abnormalities	Tumorigenesis of malignant tumor	1,69E-03		-1,086	ABCB1, ACAT1, ACLY, BCL2L1, BLM, C3, CACYBP, CDH2, CDKN2C, CDKN2D, CEACAM1, COCH, COL11A1, DEFB1, FAS, FGF18, GSTM1, HMGB1, HNF4A, HSP90AB1, IGF2R, IL2, ITGA6, KLK10, LDHA, LMO7, LRP8, MAP3K8, MAPK8, MAPK8IP1, MIF, MITF, NPM1, NTRK1, OSBPL1A, PF4, PTCH1, PTMA, PTPRE, SFRP1, SLPI, SOX4, TNK2, TPR, TRA2A, TTC3, WDHD1, WFDC2	48
Cancer, Organismal Injury and Abnormalities	Growth of tumor	7,89E-06		0,972	ACAT1, ACLY, ADGRB1, BCL2L1, CACYBP, CARD10, CEACAM1, CHEK1, ELF5, EPHB2, FAS, FGF18, FHL1, GPC5, HCST, HMGB1, HNF4A, IL2, ILF3, LDHA, LEPR, MAP1LC3A, MAP3K8, MIF, NPM1, NPY, NRG1, NT5E, PDGFD, PPARGC1A, PRKCA, PTCH1, PTPRE, RPS4X, S100A10, SELE, SFRP1, SIX1, SLC39A6, SLC7A5, SLPI, TFF3, TGFBR1, TIAM1, TNFRSF11B, TPR, VEGFD	47
Cancer, Organismal Injury and Abnormalities, Reproductive System Disease	Tumorigenesis of reproductive tract	9,49E-04			ABCB1, ADAMTS5, AGR2, ATP6V1B1, BCL2L1, CDH2, CDKN2C, CDKN2D, CFB, CHEK1, COL11A1, EIF3A, EPHB2, EYA2, FAS, FGF18, FHL1, GPM6A, GSTM1, HSP90AB1, ITGA6, KLK10, LRP8, MAPK8IP1, MEGF9, NPM1, NRG1, NT5E, PF4, PI3, PLP1, PTCH1, RASL12, RPL9, SAA1, SFRP1, SLC7A5, SLPI, SOX4, SSRP1, TCF21, TFF3, TGFBR1, THOC1, TMC8, TRA2A, WFDC2	47
Organismal Injury and Abnormalities	Benign lesion	9,90E-04		0,062	ADGRL1, APP, BCL2L1, C3, CA1, CDH2, CDKN2C, CEACAM1, COL11A1, COL4A5, COL9A3, DKC1, FAS, FGF18, GLTP, GPM6A, GSC, GSTM1, HMGB1, HSP90AB1, ITGA6, KLK10, LEPR, LRP8, MAPK8, MAPK8IP1, MEGF9, OSBPL1A, PCSK2, PDE11A, PELP1, PISD, PLP1, PRKCA, PTCH1, PTPRE, RELN, ROBO2, RPL9, S100A8, SFRP1, SLC7A5, SLPI, SOX4, TNFRSF1B, TRA2A, WFDC2	47
Cancer, Organismal Injury and Abnormalities, Reproductive System Disease	Female genital neoplasm	1,11E-03			ABCB1, ADAMTS5, AGR2, ATP6V1B1, BCL2L1, CDH2, CDKN2C, CDKN2D, CFB, CHEK1, COL11A1, EIF3A, EPHB2, EYA2, FAS, FGF18, FHL1, GPM6A, GSTM1, HSP90AB1, ITGA6, KLK10, LRP8, MAPK8IP1, MEGF9, NPM1, NRG1, NT5E, PF4, PI3, PLP1, PTCH1, RASL12, RPL9, SAA1, SFRP1, SLC7A5, SLPI, SOX4, SSRP1, TCF21, TFF3, TGFBR1, THOC1, TMC8, TRA2A, WFDC2	47
Cancer, Gastrointestinal Disease, Organismal Injury and Abnormalities	Colorectal cancer	1,84E-03		1,069	ABCB1, ACLY, AGR2, BCL2L1, CA1, CACYBP, CDH2, CDKN2C, CEACAM1, CRIP1, CRYBG1, EMP1, EPHB2, FAS, FSTL3, GSTM1, HMGB1, HNF4A, HNRNPA2B1, HSP90AB1, IL2, ITGA6, LDHA, LRP8, LTF, MAPK8, MAPK8IP1, MIF, NRG1, NTRK1, OSBPL1A, PDLIM1, PRSS23, PTMA, RAE1, SGK2, SLC7A5, SLPI, TAGLN2, TCF21, TFF3, TLE6, TNFRSF11B, TNS4, TTC38, USP53, WDHD1	47
Hematological System Development and Function, Tissue Morphology	Quantity of leukocytes	1,65E-04		-0,408	ABCB1, ACAT1, AGR2, APP, BCL2A1, BCL2L1, BLM, C3, CCL19, CCL28, CD247, CDKN2C, CXCR5, DKC1, FAS, GIMAP1, GNLY, HCST, HMGB1, IGF2R, IL2, IL37, ITGA6, LEPR, MAP3K8, MAPK8, MIF, NPM1, NPY, NTRK1, PHC1, PI3, PLAC8, PLP1, S100A8, SAA1, SELE, SLC39A10, SLCO1A2, SLPI, SOX4, TGFBR1, TNFRSF11B, TNFRSF13C, TNFRSF1B, TRA	46
Cell Morphology, Cellular Assembly and Organization, Cellular Function and Maintenance	Formation of cellular protrusions	3,56E-04		-0,113	ADGRB1, APP, ARPC3, ATP8A2, C2CD3, C3, CAMK1D, CCL19, CDH2, CDK5R1, CRIP1, CUX2, DDAH1, EFNA3, EPHB2, FGD3, FGD4, GPM6A, HMGB1, HNF4A, ITGA6, LCP1, LRP8, MAPK8, MAPK8IP1, NPY, NRG1, NTRK1, PLEKHG4, PRKCA, PRSS12, PTPRE, RANBP1, RELN, ROBO2, SDC3, SEMA3A, SEPT11, SLC9A3R1, SMPD2, SRGAP2, TGFBR1, TIAM1, TNFRSF1B, TNK2, VEGFD	46
Lipid Metabolism, Molecular Transport, Small Molecule Biochemistry	Concentration of lipid	1,92E-05		1,264	ABCB1, ACAT1, ACLY, ACSL1, AHSG, ANGPTL6, ANXA6, APP, BCAT2, BCL2L1, C3, CDKN2C, CDKN2D, CEACAM1, CFB, FAS, FFAR2, GNLY, GPAT4, GPD2, HNF4A, IL2, KDM5B, LBP, LEPR, MAP3K8, MAPK8, MIF, NPY, NPY5R, NTRK1, PEX11A, PHYH, PLP1, PNPLA4, PPARGC1A, PRKCA, RDH16, S100A8, SAA1, SFTPC, SLC2A8, SLC9A3R1, SMPD2, TTPA	45
Nervous System Development and Function, Neurological Disease	Abnormal morphology of nervous system	2,31E-05			APP, ATP13A2, ATP8A2, C3, CD247, CDK5R1, CDKN2C, CLIP3, CUX2, EFNA3, EPHB2, FGD4, GPR143, GSC, HIRA, HNRNPA2B1, IL37, ITGA6, KCNQ1, LEPR, LHX2, LRP8, MAOB, MAPK8IP1, MARCKSL1, MIF, NDP, NTRK1, PHYH, PINK1, PLP1, PPARGC1A, PRSS12, PTCH1, REST, ROBO2, SEMA3A, SIX1, SLC26A4, SLC2A8, SOX4, SUN2, TNFRSF1B, TRA, TTPA	45
Cellular Development, Cellular Growth and Proliferation	Proliferation of blood cells	8,18E-05		-0,851	ABCB1, ACLY, BCL2A1, BCL2L1, BLM, C3, CCL19, CD247, CDKN2C, CDKN2D, CEACAM1, EPHB2, FAS, GIMAP1, GP2, HMGB1, HNRNPA2B1, HOXB3, IL2, LCP1, LEPR, LTF, MAP3K8, MAPK8, MIF, NPM1, NPY, NRG1, NT5E, PF4, PLP1, RPS3, SEMA3A, SLC39A10, SLPI, SOX5, STAP2, TALDO1, TBC1D10C, TGFBR1, TNFRSF11B, TNFRSF13C, TNFRSF1B, TRA, WNT2B	45
Cancer, Organismal Injury and Abnormalities	Tumorigenesis of carcinoma	1,04E-03		-0,383	ABCB1, ACAT1, ACLY, BCL2L1, CACYBP, CDH2, CDKN2C, CEACAM1, COCH, COL11A1, DEFB1, FAS, FGF18, GSTM1, HMGB1, HNF4A, HSP90AB1, IGF2R, IL2, ITGA6, KLK10, LDHA, LMO7, LRP8, MAPK8, MAPK8IP1, MIF, MITF, NPM1, NTRK1, OSBPL1A, PF4, PTCH1, PTMA, PTPRE, SFRP1, SLPI, SOX4, TNK2, TPR, TRA2A, TTC3, WDHD1, WFDC2	44
Connective Tissue Disorders, Organismal Injury and Abnormalities, Skeletal and Muscular Disorders	Non-traumatic arthropathy	6,42E-06			ABCB1, ACLY, ADAMTS5, AHSG, C2, CCL19, CD247, CDKN2D, CFB, COCH, COL11A1, COL4A5, CXCR5, ERH, FAS, GAR1, GNB2, GNLY, HMGB1, HNRNPA1, IL2, LBP, LCP1, LTF, MAOB, MIF, NT5E, NTRK1, PDGFD, PTMA, PTPRE, RPL31, RPS3, S100A10, S100A8, SAA1, SDC3, SEC14L3, SELE, TALDO1, TNFRSF11B, TNFRSF1B, TRA	43
Neurological Disease, Organismal Injury and Abnormalities, Psychological Disorders	Disorder of basal ganglia	7,56E-06		-1,387	ABCB1, ACAT1, ADCY2, APP, ATP13A2, BCL2L1, C3, CDH2, CDK5R1, CHAF1B, COCH, CPNE5, EPHB2, FAS, HNRNPDL, HNRNPU, KCNQ1, LDHA, LHX2, LTF, MAOB, NPM1, NPY, PDE11A, PDLIM1, PINK1, PNKD, PPARGC1A, PTBP2, PTPRE, RAN, RANBP1, RASL12, RGS14, RPL31, RPS4X, RTN2, S100A10, SCUBE2, SYNPR, TCERG1, TMEFF1, ZNF385B	43
Cardiovascular System Development and Function, Organismal Development	Vasculogenesis	2,54E-05		-0,240	ADGRB1, APP, ATP6V0A2, C3, CDH2, CDKN2D, CEACAM1, CFB, CUL5, DDAH1, EMP1, EPHB2, FAS, GSTM1, HIRA, HMGB1, HOXB3, IL2, KLF1, LDHA, LEMD3, LEPR, LRP8, LUZP1, MAPK8, NDP, NPPC, NPY, NRG1, PCSK5, PDGFD, PF4, PPARGC1A, PRKCA, PTCH1, S100A8, SAA1, SELE, SEMA3A, SFRP1, TGFBR1, VEGFD, ZC3H13	43
Cancer, Organismal Injury and Abnormalities	Head and neck neoplasia	1,11E-04		-1,932	ADAMTS5, BCL2L1, C3, CA1, CDKN2C, CIP2A, COCH, COL11A1, DKC1, EPHB2, FCGBP, FGD4, GSTM1, HSP90AB1, IL2, ITGA6, ITGA8, LDHA, LEPR, MAP3K8, MAPK8IP1, MAPKAP1, NPM1, NRG1, NTRK1, PDGFD, PISD, PRKCA, PTCH1, PTPRE, RAB25, RASAL1, RELN, REST, ROBO2, S100A8, SERPINB13, SFRP1, TFF3, TGFBR1, THOC1, TIAM1, TNK2	43
Cancer, Organismal Injury and Abnormalities	Abdominal carcinoma	1,13E-03		0,728	ABCB1, ACAT1, AGR2, BCL2L1, CDH2, CDK5R1, CDKN2C, CFB, CHEK1, COCH, COL11A1, DEFB1, EPHB2, FAS, FGF18, GPM6A, GSTM1, HMGB1, HSP90AB1, KLK10, LEPR, LRP8, MAPK8IP1, MITF, NPM1, NPY, NTRK1, OSBPL1A, PCSK2, PF4, PI3, PLP1, PTCH1, PTPRE, RPL9, SAA1, SFRP1, SLC7A5, SLPI, TCF21, TNS4, TRA2A, WFDC2	43
Cellular Movement	Invasion of tumor cell lines	7,82E-06		-0,141	ACAT1, AGR2, AJAP1, APP, ATP6V0A4, BCL2L1, BIRC7, CARD10, CCL19, CDH2, CDK5R1, CEACAM1, COL11A1, EIF3A, EPHB2, EYA2, FAS, HMGB1, HNRNPA2B1, ILF3, LCP1, LDHA, MAPK8, MIF, MITF, NPM1, NRG1, PDLIM1, PRKCA, RAB25, S100A10, SAA1, SFRP1, SLC9A3R1, SNAP23, SOX4, TAGLN2, TFF3, TIAM1, TNK2, TNS4, VEGFD	42
Cellular Development, Cellular Growth and Proliferation, Nervous System Development and Function, Tissue Development	Development of neurons	1,89E-04	Decreased	-2,436	ADGRB1, ADGRL1, ADNP, APP, ATP8A2, BCL2L1, C3, CAMK1D, CBLN2, CCL19, CDH2, CDK5R1, COL4A5, CRIP1, CUX2, DDAH1, EFNA3, EPHB2, FTO, GPM6A, HMGB1, LRP8, LRRC4B, MAPK8, MAPK8IP1, NPY, NRG1, NTRK1, PRKCA, PRSS12, PTPRE, RELN, ROBO2, SEMA3A, SEPT11, SIX1, SOX4, SRGAP2, SUN2, TIAM1, TNFRSF1B, TNK2	42
Cellular Development, Cellular Growth and Proliferation, Hematological System Development and Function, Hematopoiesis, Lymphoid Tissue Structure and Development, Tissue Development	Leukopoiesis	1,89E-04		0,861	APP, BCL2A1, BCL2L1, BLM, C3, CCL19, CD247, CDKN2D, CEACAM1, CHEK1, CXCR5, EMP1, FAS, GIMAP1, GNLY, HMGB1, IGF2R, IL2, LCP1, LEPR, LTF, MAP3K8, MAPK8, MAPKAP1, MIF, MXD3, NTRK1, PF4, PHC1, PLP1, PRKCA, SELE, SEMA3A, SFRP1, SOX4, SOX5, STAP2, TGFBR1, TNFRSF11B, TNFRSF13C, TNFRSF1B, TRA	42
Neurological Disease, Skeletal and Muscular Disorders	Neuromuscular disease	2,78E-04		-0,577	ABCB1, ACAT1, ADCY2, APP, ATP13A2, BCL2L1, C3, CDH2, CDK5R1, CFB, CHAF1B, COCH, CPNE5, EPHB2, FAS, HNRNPDL, HNRNPU, IL2, KCNQ1, LDHA, LTF, MAOB, MIF, NPM1, NPY, PDE11A, PDLIM1, PINK1, PPARGC1A, PTPRE, RAN, RANBP1, RASL12, RGS14, RPL31, RPS4X, RTN2, SCUBE2, SYNPR, TCERG1, TMEFF1, ZNF385B	42
Cancer, Organismal Injury and Abnormalities	Abdominal adenocarcinoma	4,53E-04		0,728	ABCB1, ACAT1, AGR2, BCL2L1, CDH2, CDK5R1, CDKN2C, CFB, COCH, COL11A1, DEFB1, EPHB2, FAS, FGF18, GPM6A, GSTM1, HMGB1, HSP90AB1, KLK10, LEPR, LRP8, MAPK8IP1, MITF, NPM1, NPY, NTRK1, OSBPL1A, PCSK2, PF4, PI3, PLP1, PTCH1, PTPRE, RPL9, SAA1, SFRP1, SLC7A5, SLPI, TCF21, TNS4, TRA2A, WFDC2	42
Cellular Development, Cellular Growth and Proliferation, Hematological System Development and Function, Lymphoid Tissue Structure and Development	Proliferation of immune cells	1,08E-04		-0,933	ACLY, BCL2A1, BCL2L1, BLM, C3, CCL19, CD247, CDKN2C, CDKN2D, CEACAM1, EPHB2, FAS, GIMAP1, GP2, HMGB1, HNRNPA2B1, IL2, LCP1, LEPR, LTF, MAP3K8, MAPK8, MIF, NPM1, NPY, NRG1, NT5E, PLP1, RPS3, SEMA3A, SLC39A10, SLPI, SOX5, STAP2, TALDO1, TBC1D10C, TGFBR1, TNFRSF11B, TNFRSF13C, TNFRSF1B, TRA	41
Cellular Growth and Proliferation, Lymphoid Tissue Structure and Development	Proliferation of lymphatic system cells	2,15E-04		-0,835	ACLY, APP, BCL2A1, BCL2L1, BLM, C3, CCL19, CD247, CDKN2C, CEACAM1, EPHB2, FAS, GIMAP1, GP2, HMGB1, HNRNPA2B1, HSP90AB1, IL2, LCP1, LEPR, LTF, MAP3K8, MAPK8, MIF, NPM1, NPY, NT5E, PF4, PHC1, PLP1, RPS3, SLC39A10, SLPI, SOX5, STAP2, TBC1D10C, TGFBR1, TNFRSF11B, TNFRSF13C, TNFRSF1B, TRA	41
Cell Death and Survival, Organismal Injury and Abnormalities	Necrosis of epithelial tissue	1,98E-07		0,193	APP, ATP13A2, BCL2A1, BCL2L1, CALCR, CDH2, CEACAM1, CHEK1, EMP1, EPHB2, FAS, GNLY, HMGB1, HNF4A, IL2, ITGA6, LDHA, MAP3K8, MAPK8, MIF, MITF, NPM1, NRG1, NTRK1, PINK1, PPARGC1A, PRKCA, PTCH1, S100A8, SAA1, SEMA3A, SFRP1, SIX1, SLC47A1, SSRP1, TFF3, TGFBR1, TIAM1, TNFRSF11B, TNFRSF1B	40
Cell Death and Survival	Neuronal cell death	2,63E-05		-0,960	ADNP, APP, ATP13A2, BCL2L1, CDH2, CDK5R1, CDKN2D, CHEK1, EFNA3, EPHB2, FAS, HMGB1, HSP90AB1, IL2, LDHA, MAOB, MAPK8, MAPK8IP1, MIF, MXD3, NDP, NPM1, NRG1, NTRK1, PINK1, PLP1, PPARGC1A, PRKCA, PTCH1, REST, RPS3, SEMA3A, SIX1, SMPD2, SOX4, TCERG1, TNFRSF1B, USP53, WNK3	39
Tissue Development	Growth of epithelial tissue	2,82E-05		-0,740	AGR2, ANGPTL6, APP, ATP6V0A2, BCL2A1, C3, CDH2, CDKN2C, CEACAM1, DDAH1, FAS, FGF18, HMGB1, HNF4A, HUNK, ITGA6, KDM5B, LEPR, LTF, MAPK8, NDP, NPM1, PDGFD, PELP1, PF4, PRKCA, PTCH1, S100A8, SAA1, SEMA3A, SFRP1, SIX1, SLC7A5, SOX4, TGFBR1, TMC8, TNFRSF1B, VEGFD, ZC3H13	39
Organismal Development, Reproductive System Development and Function	Development of reproductive system	3,69E-04		-1,633	AGRP, AHSG, AMPH, BCL2L1, BLM, CDKN2C, CHEK1, CIP2A, CLIP1, COL9A3, EIF2S2, FSTL3, GPAT4, HIRA, HSP90AB1, HUNK, KDM5B, LEPR, LRP8, MEI1, MIF, NDP, NPPC, NRG1, NTRK1, PELP1, PHC2, PTCH1, RANBP1, SFRP1, SPAG11B, SUN5, TCF21, TGFBR1, TTPA, WFDC2, WNT2B, XRN2, ZC3HC1	39
Cellular Movement	Migration of tumor cell lines	3,96E-04		-0,681	APP, BCL2L1, CARD10, CCL19, CDH2, CEACAM1, CIP2A, COL11A1, EPHB2, EYA2, HNRNPA2B1, IL2, ILF3, ITGA6, LDHA, LEPR, LMO7, MAP3K8, MAPK8, MIF, MITF, MYADM, NPM1, NRG1, PDLIM1, PRKCA, REST, S100A10, S100A8, SDC3, SEMA3A, SLC9A3R1, STAP2, TGFBR1, TIAM1, TLE6, TNFRSF11B, TNK2, VEGFD	39
Cellular Movement	Cell movement of myeloid cells	5,43E-07	Increased	2,156	APP, BLM, C2, C3, CAMK1D, CCL19, CCL28, CEACAM1, CFB, CXCR5, DEFB1, FAS, GNLY, HMGB1, IL2, ITGA6, LBP, LTF, MAP3K8, MIF, NPM1, NT5E, PF4, PLP1, PRKCA, PTMA, S100A10, S100A8, SAA1, SELE, SEMA3A, SFRP1, SFTPC, SLPI, STAP2, TNFRSF1B, TRA, VEGFD	38
Connective Tissue Disorders, Immunological Disease, Inflammatory Disease, Inflammatory Response, Organismal Injury and Abnormalities, Skeletal and Muscular Disorders	Rheumatoid arthritis	1,10E-05			ABCB1, ACLY, AHSG, C2, CCL19, CD247, CDKN2D, CFB, COCH, COL4A5, CXCR5, ERH, GAR1, GNB2, GNLY, HMGB1, HNRNPA1, IL2, LBP, LCP1, LTF, MAOB, MIF, NTRK1, PTMA, PTPRE, RPL31, RPS3, S100A10, S100A8, SAA1, SDC3, SEC14L3, SELE, TALDO1, TNFRSF11B, TNFRSF1B, TRA	38
Neurological Disease	Neurological signs	2,38E-05		-0,761	ABCB1, ACAT1, ADCY2, APP, BCL2L1, C3, CDH2, CDK5R1, CHAF1B, COCH, CPNE5, EPHB2, HNRNPA2B1, HNRNPDL, HNRNPU, KCNQ1, LDHA, LRP8, MAOB, NPM1, NPY, PDLIM1, PNKD, PPARGC1A, PTPRE, RANBP1, RASL12, RGS14, RTN2, S100A10, SCUBE2, SLC26A4, SYNPR, TCERG1, TMEFF1, TRA, VEGFD, ZNF385B	38
Cellular Development, Cellular Growth and Proliferation, Hematological System Development and Function, Lymphoid Tissue Structure and Development	Proliferation of mononuclear leukocytes	3,44E-04		-0,588	ACLY, BCL2A1, BCL2L1, BLM, C3, CCL19, CD247, CDKN2C, CEACAM1, EPHB2, FAS, GIMAP1, GP2, HMGB1, HNRNPA2B1, IL2, LCP1, LEPR, LTF, MAP3K8, MAPK8, MIF, NPM1, NPY, NT5E, PLP1, RPS3, SLC39A10, SLPI, SOX5, STAP2, TALDO1, TBC1D10C, TGFBR1, TNFRSF11B, TNFRSF13C, TNFRSF1B, TRA	38
Cancer, Organismal Injury and Abnormalities, Reproductive System Disease	Female genital tract cancer	1,54E-03			ABCB1, ADAMTS5, AGR2, ATP6V1B1, BCL2L1, CDH2, CDKN2C, CFB, CHEK1, COL11A1, EIF3A, EPHB2, EYA2, FAS, FGF18, FHL1, GPM6A, GSTM1, HSP90AB1, KLK10, LRP8, MAPK8IP1, NPM1, PF4, PI3, PLP1, PTCH1, RASL12, SAA1, SFRP1, SLC7A5, SLPI, SSRP1, TCF21, TFF3, TGFBR1, TRA2A, WFDC2	38
Inflammatory Response	Inflammatory response	1,58E-03		1,495	ABCB1, AHSG, APP, ART3, BCL2A1, C3, CAMK1D, CCL19, CCL28, CXCR5, DEFB1, GNLY, HMGB1, HNF4A, HNRNPA0, IL2, IL37, LBP, LCP1, LTF, MAOB, MAPK8, MIF, NPY, NRG1, NT5E, PF4, PLP1, PRKCA, S100A8, SAA1, SELE, SFRP1, SLPI, TIAM1, TNFRSF1B, TRA, VEGFD	38
Cell Death and Survival, Organismal Injury and Abnormalities	Cell death of epithelial cells	3,90E-08		0,423	APP, ATP13A2, BCL2A1, BCL2L1, CALCR, CDH2, CEACAM1, CHEK1, EMP1, EPHB2, FAS, GNLY, HMGB1, HNF4A, IL2, ITGA6, LDHA, MAP3K8, MAPK8, MIF, MITF, NPM1, NTRK1, PINK1, PPARGC1A, PRKCA, PTCH1, SAA1, SFRP1, SIX1, SLC47A1, SSRP1, TFF3, TGFBR1, TIAM1, TNFRSF11B, TNFRSF1B	37
Cellular Development, Connective Tissue Development and Function, Tissue Development	Differentiation of connective tissue cells	9,76E-05		-1,220	ANXA6, C3, CALCR, CEACAM1, CREB3L2, FAS, FFAR2, FGF18, FSTL3, HCST, HIRA, HNRNPU, ITGA6, LRP8, LTF, MAPK8, MITF, MYBBP1A, NPPC, NPY, NRG1, PEX11A, PLAC8, PPARGC1A, PRKCA, PTCH1, PTPRE, S100A8, SCUBE2, SEMA3A, SFRP1, SOX5, TCF21, TGFBR1, TNFRSF11B, VEGFD, WNT2B	37
Cell Death and Survival	Cell death of blood cells	1,13E-04		0,656	ABCB1, ACAT1, APP, BCL2A1, BCL2L1, BLM, C3, CCL19, CD247, CHEK1, EYA2, FAS, GIMAP1, GP2, HCST, HMGB1, HSP90AB1, IL2, LEPR, LTF, MAPK8, MIF, MXD3, NPM1, PF4, PRKCA, RAN, S100A8, SLC39A10, SLPI, SOX4, STAP2, TNFRSF11B, TNFRSF13C, TNFRSF1B, TPR, TRA	37
Cell-To-Cell Signaling and Interaction, Hematological System Development and Function	Activation of blood cells	4,28E-04		0,428	APP, BCL2L1, C3, CD247, CEACAM1, CXCR5, ENTPD2, EPHB2, FAS, GNLY, GP2, HMGB1, HNF4A, IGF2R, IL2, IL37, LBP, LTF, MAOB, MAP3K8, MAPK8, MIF, NPY, NRG1, NT5E, PF4, PLP1, PRKCA, PTPRE, S100A8, SAA1, SELE, SFRP1, SLPI, TBC1D10C, TNFRSF1B, TRA	37
Cellular Development, Cellular Growth and Proliferation, Hematological System Development and Function, Lymphoid Tissue Structure and Development	Proliferation of lymphocytes	5,20E-04		-0,717	ACLY, BCL2A1, BCL2L1, BLM, C3, CCL19, CD247, CDKN2C, CEACAM1, EPHB2, FAS, GIMAP1, GP2, HMGB1, HNRNPA2B1, IL2, LCP1, LEPR, LTF, MAP3K8, MAPK8, MIF, NPM1, NPY, NT5E, PLP1, RPS3, SLC39A10, SLPI, SOX5, STAP2, TBC1D10C, TGFBR1, TNFRSF11B, TNFRSF13C, TNFRSF1B, TRA	37
Organismal Survival	Survival of organism	5,99E-04		-1,906	ABCB1, APP, BCL2A1, BCL2L1, C3, CDKN2C, CEACAM1, CFB, CHEK1, COCH, EPN2, FAS, HMGB1, IGF2R, IL2, KLF1, LBP, LEPR, LTF, MAP3K8, MARCKSL1, MIF, NPM1, NRG1, NT5E, NTRK1, PHC1, PHC2, PINK1, REST, SELE, SEMA3A, SOX4, TGFBR1, THOC1, TNFRSF1B, WFDC2	37
Cellular Movement	Chemotaxis	2,99E-06	Increased	2,082	APP, C3, CAMK1D, CCL19, CCL28, CEACAM1, CXCR5, DEFB1, EPHB2, FAS, GNB2, GNLY, HMGB1, IGF2R, IL2, ITGA6, LBP, LCP1, MIF, NPY, NRG1, NT5E, PDGFD, PF4, PRKCA, ROBO2, S100A8, SAA1, SELE, SEMA3A, SLPI, TFF3, TGFBR1, TIAM1, TRA, VEGFD	36
Cellular Movement, Hematological System Development and Function, Immune Cell Trafficking, Inflammatory Response	Cell movement of phagocytes	4,08E-06		1,939	APP, BLM, C2, C3, CAMK1D, CCL19, CEACAM1, CFB, DEFB1, FAS, GNLY, HMGB1, IL2, ITGA6, LBP, MAP3K8, MIF, NPM1, NPY, NT5E, PF4, PLP1, PRKCA, PTMA, S100A10, S100A8, SAA1, SELE, SEMA3A, SFRP1, SFTPC, SLPI, STAP2, TNFRSF1B, TRA, VEGFD	36
Cell Death and Survival	Cell death of immune cells	6,80E-05		0,528	ACAT1, APP, BCL2A1, BCL2L1, BLM, C3, CCL19, CD247, CHEK1, EYA2, FAS, GIMAP1, GP2, HCST, HMGB1, HSP90AB1, IL2, LEPR, LTF, MAPK8, MIF, MXD3, NPM1, PF4, PRKCA, RAN, S100A8, SLC39A10, SLPI, SOX4, STAP2, TNFRSF11B, TNFRSF13C, TNFRSF1B, TPR, TRA	36
Cellular Development, Cellular Growth and Proliferation, Hematological System Development and Function, Hematopoiesis, Lymphoid Tissue Structure and Development, Tissue Development	Hematopoiesis of mononuclear leukocytes	5,60E-04		0,510	APP, BCL2A1, BCL2L1, BLM, C3, CCL19, CD247, CHEK1, CXCR5, FAS, GIMAP1, GNLY, HMGB1, IGF2R, IL2, LCP1, LEPR, LTF, MAPK8, MAPKAP1, MIF, MXD3, NTRK1, PF4, PHC1, PLP1, PRKCA, SFRP1, SOX4, SOX5, STAP2, TGFBR1, TNFRSF11B, TNFRSF13C, TNFRSF1B, TRA	36
Hematological System Development and Function, Lymphoid Tissue Structure and Development, Tissue Morphology	Quantity of lymphocytes	6,12E-04		0,468	ABCB1, APP, BCL2A1, BCL2L1, BLM, C3, CCL19, CD247, CDKN2C, CXCR5, DKC1, FAS, GIMAP1, GNLY, HCST, IGF2R, IL2, ITGA6, LEPR, MAP3K8, MAPK8, MIF, NPY, NTRK1, PHC1, PLP1, SAA1, SELE, SLC39A10, SLCO1A2, SOX4, TGFBR1, TNFRSF11B, TNFRSF13C, TNFRSF1B, TRA	36
Infectious Diseases	Infection of cells	2,00E-03		-1,451	ADAMTS5, AMPH, APP, ARPC3, C2, C3, CAMK1D, CLIP1, CLIP3, CUL5, DCBLD1, DEFB1, EIF3A, EPN2, FAS, GPD2, HMGB1, HNRNPDL, HNRNPU, IGF2R, IL2, ILF3, LTF, MKRN2, NUP155, PRKCA, RANBP1, RTN2, SEPT8, SNW1, TAGLN2, TNFRSF1B, TPPP, TTC3, ZCCHC17, ZNF292	36
Lipid Metabolism, Small Molecule Biochemistry	Fatty acid metabolism	2,22E-05		-1,700	ABCB1, ACAT1, ACLY, ACSL1, ANXA6, APP, ATP8A2, BCL2L1, CEACAM1, ELOVL6, FAS, GNLY, GPAT4, HNF4A, LBP, LEPR, LTF, MAP3K8, MAPK8, MIF, MITF, NRG1, OSBPL1A, PLP1, PPARGC1A, PRKCA, PTCH1, RELN, S100A8, SAA1, SEMA3A, SLC9A3R1, SLCO1A2, SMPD2, SPTSSB	35
Nervous System Development and Function	Morphology of central nervous system	2,77E-05			APP, C3, CD247, CDK5R1, CDKN2C, CUX2, EFNA3, EPHB2, FTO, GSC, HIRA, IGF2R, IL2, ITGA6, KIF5C, LEPR, LHX2, LRP8, MAPK8IP1, MARCKSL1, NTRK1, PHYH, PINK1, PLP1, PPARGC1A, PTCH1, RELN, REST, ROBO2, SDC3, SEMA3A, SLC2A8, SUN2, TNFRSF1B, TTPA	35
Cell-To-Cell Signaling and Interaction, Hematological System Development and Function, Immune Cell Trafficking, Inflammatory Response	Activation of leukocytes	4,33E-04		0,600	APP, BCL2L1, C3, CD247, CEACAM1, CXCR5, FAS, GNLY, GP2, HMGB1, HNF4A, IGF2R, IL2, IL37, LBP, LTF, MAOB, MAP3K8, MAPK8, MIF, NPY, NRG1, NT5E, PF4, PLP1, PRKCA, PTPRE, S100A8, SAA1, SELE, SFRP1, SLPI, TBC1D10C, TNFRSF1B, TRA	35
Cancer, Organismal Injury and Abnormalities	Head and neck cancer	6,02E-04			ADAMTS5, BCL2L1, CA1, CDKN2C, CIP2A, COCH, COL11A1, EPHB2, FCGBP, FGD4, GSTM1, HSP90AB1, IL2, ITGA6, ITGA8, LDHA, MAP3K8, MAPK8IP1, MAPKAP1, NPM1, NRG1, NTRK1, PDGFD, PTCH1, PTPRE, RAB25, RASAL1, REST, ROBO2, SERPINB13, SFRP1, TFF3, TGFBR1, TIAM1, TNK2	35
Digestive System Development and Function	Morphology of digestive system	6,83E-04			ABCB1, AGR2, APP, C3, CEACAM1, CREB3L2, CXCR5, ENTPD2, EPHB2, FAS, FGF18, FSTL3, GCNT3, GSC, IGF2R, IL2, ITGA6, KCNQ1, LEPR, LHX2, MAP3K8, MAPK8, MAPK8IP1, MAT1A, MIF, PCSK2, PEX11A, PPARGC1A, RDH16, SIX1, SLC9A3R1, TFF3, TNFRSF11B, TNFRSF1B, TRA	35
Cellular Function and Maintenance	Ion homeostasis of cells	4,17E-05		1,423	ANXA6, APP, ATP13A2, ATP2C2, ATP6V0A2, ATP6V1B1, C3, CALCR, CCL19, CCL28, CD247, CDK5R1, CXCR5, DEFB1, EPHB2, FAS, HMGB1, HNF4A, IL2, KCNQ1, MAPK8, NPPC, NPY, NRG1, PF4, PRKCA, RELN, SAA1, SLC26A4, SLC39A10, SLC39A6, SLC9A3R1, TNFRSF11B, TNK2	34
Cancer, Gastrointestinal Disease, Organismal Injury and Abnormalities	Gastrointestinal carcinoma	4,71E-04			ABCB1, ACLY, AJAP1, BCL2L1, CACYBP, CDH2, CEACAM1, CIP2A, COCH, COL11A1, FAS, FGD4, GSTM1, HMGB1, HSP90AB1, IGF2R, IL2, ITGA6, ITGA8, LRP8, MAPK8IP1, MIF, NPM1, NTRK1, OSBPL1A, PDGFD, PTCH1, PTMA, PTPRE, RASAL1, ROBO2, TIAM1, TTC3, WDHD1	34
Lipid Metabolism, Small Molecule Biochemistry	Synthesis of lipid	1,59E-03		-0,250	ABCB1, ACAT1, ACLY, ACSL1, APP, BCL2L1, C3, CEACAM1, ELOVL6, FAS, GNLY, GPAT4, HNF4A, ITGA6, LEPR, LTF, MAP3K8, MAPK8, MIF, MITF, NRG1, NTRK1, PISD, PLP1, PNPLA4, PPARGC1A, PRKCA, RDH16, REST, SEMA3A, SLC9A3R1, SMPD2, SPTSSB, TNFRSF1B	34
Inflammatory Response	Immune response of cells	6,74E-05		1,114	ABCB1, ADGRB1, AHSG, APP, BCL2L1, C3, CAMK1D, CCL19, CD247, CDK5R1, CEACAM1, CLIP1, COCH, FAS, HMGB1, IL2, LEPR, LTF, MAP3K8, MAPK8, MIF, NPM1, NPY, PF4, PLP1, PRKCA, S100A8, SAA1, SNAP23, TNFRSF11B, TNFRSF1B, TTC3, TTPA	33
Cell Death and Survival	Cell death of connective tissue cells	1,10E-04		0,724	ABCB1, APP, BCL2A1, BCL2L1, BLM, CDKN2C, CHEK1, CREB3L2, FAS, GNB2, HNRNPA1, IGF2R, ITGA6, MAP3K8, MAPK8, MAPKAP1, NTRK1, PDGFD, PINK1, PLAC8, PRKCA, RAB25, RAI14, S100A8, SAA1, SFRP1, SMPD2, SUN2, TGFBR1, THOC1, TIAM1, TNFRSF11B, TNFRSF1B	33
Cell Morphology, Nervous System Development and Function, Tissue Morphology	Morphology of neurons	2,25E-04			ADGRB1, APP, ATP13A2, BCL2L1, C3, CDH2, CDK5R1, CLIP3, EPHB2, HNRNPA2B1, IL37, KCNQ1, LEPR, LRP8, MAOB, MAPK8IP1, MIF, NRG1, NTRK1, PHYH, PINK1, PLP1, PPARGC1A, PRSS12, ROBO2, SEMA3A, SEPT11, SLC26A4, SOX4, SUN2, TIAM1, TRA, VEGFD	33
Cell Morphology, Cellular Assembly and Organization, Cellular Development, Cellular Function and Maintenance, Cellular Growth and Proliferation, Nervous System Development and Function, Organismal Development, Tissue Development	Neuritogenesis	6,75E-04		-1,064	ADGRB1, APP, ATP8A2, C3, CAMK1D, CCL19, CDH2, CDK5R1, CRIP1, CUX2, DDAH1, EFNA3, EPHB2, GPM6A, HMGB1, LRP8, MAPK8, MAPK8IP1, NPY, NRG1, NTRK1, PRKCA, PRSS12, PTPRE, RELN, ROBO2, SEMA3A, SEPT11, SRGAP2, TIAM1, TNFRSF1B, TNK2	32
Cell-To-Cell Signaling and Interaction, Cellular Assembly and Organization	Cell-cell contact	1,13E-03	Decreased	-2,601	ADGRB1, ADGRL1, ADNP, AMPH, APP, C3, CBLN2, CDH2, CDK5R1, CEACAM1, CLIP3, COL4A5, CTNNA3, CUX2, EPHB2, GPM6A, HNF4A, ITGA6, LRRC4B, MARCKSL1, NRG1, NT5E, NTRK1, PRKCA, RELN, SELE, SIX1, SOX4, SUN2, TGFBR1, TIAM1, TNFRSF11B	32
Connective Tissue Development and Function, Tissue Development	Growth of connective tissue	1,35E-03		-0,692	BCL2L1, BLM, CDKN2C, CEACAM1, CREB3L2, DKC1, FAS, FGF18, GP2, HNRNPA2B1, IL2, LEPR, LTF, MAPK8, MIF, NPM1, NPPC, NPY, PDGFD, PF4, PHC2, PHF14, PRKCA, PTCH1, SAA1, SFRP1, SOX4, TALDO1, TMC8, TNFRSF11B, TNK2, TPR	32
Nervous System Development and Function, Organ Morphology, Organismal Development	Morphology of brain	1,14E-04			APP, C3, CD247, CDK5R1, CDKN2C, CUX2, EFNA3, EPHB2, FTO, GSC, HIRA, IGF2R, IL2, ITGA6, KIF5C, LEPR, LHX2, LRP8, MAPK8IP1, MARCKSL1, PHYH, PINK1, PPARGC1A, PTCH1, RELN, REST, ROBO2, SEMA3A, SLC2A8, SUN2, TNFRSF1B	31
Neurological Disease	Dyskinesia	7,33E-04			ABCB1, ACAT1, ADCY2, BCL2L1, C3, CDH2, CDK5R1, CHAF1B, COCH, CPNE5, EPHB2, HNRNPDL, HNRNPU, LDHA, MAOB, NPM1, NPY, PDLIM1, PNKD, PPARGC1A, PTPRE, RANBP1, RASL12, RGS14, RTN2, S100A10, SCUBE2, SYNPR, TCERG1, TMEFF1, ZNF385B	31
Cellular Movement, Hematological System Development and Function, Immune Cell Trafficking	Cell movement of mononuclear leukocytes	2,18E-05		1,599	APP, C3, CCL19, CCL28, CD247, CEACAM1, CXCR5, DEFB1, FAS, GNLY, HMGB1, IL2, IL37, ITGA6, LCP1, MAT1A, MIF, MYADM, NT5E, PF4, SAA1, SELE, SEMA3A, SFTPC, SMPD2, STAP2, TGFBR1, TIAM1, TNFRSF1B, TNK2	30
Cancer, Endocrine System Disorders, Organismal Injury and Abnormalities, Reproductive System Disease	Gonadal tumor	2,01E-04		-0,130	ABCB1, AGR2, ATP6V1B1, BCL2L1, CDKN2C, CDKN2D, CFB, CHEK1, COL11A1, DHRS7, EYA2, FAS, FGD4, FGF18, GSTM1, HSP90AB1, KLK10, LRP8, MAPK8IP1, NRG1, NT5E, PF4, RNF181, SLPI, SSRP1, TFF3, TGFBR1, THOC1, TRA2A, WFDC2	30
Metabolic Disease	Amyloidosis	1,62E-03			ACLY, ADGRL1, AMPH, APP, ATAD2, BCL2L1, C3, CDK5R1, CFB, CNKSR2, CNKSR3, COCH, CTNNA3, HNRNPA1, HNRNPA2B1, HNRNPDL, HNRNPU, IL2, KCNQ1, LRP8, MAOB, MAPK8, MAPK8IP1, MIF, NTRK1, PRKCA, PTPRE, RAN, RELN, SAA1	30
Cellular Movement	Cellular infiltration by blood cells	1,38E-06		0,167	APP, BLM, C2, C3, CCL19, CFB, CXCR5, FAS, HMGB1, IL2, LBP, LTF, MAP3K8, MAT1A, MIF, NPM1, NT5E, PF4, PLP1, PRKCA, PTMA, S100A10, S100A8, SAA1, SELE, SFRP1, SFTPC, TGFBR1, TNFRSF1B	29
Cancer, Cell Death and Survival, Organismal Injury and Abnormalities	Cell death of tumor	2,44E-05		0,112	ACLY, APP, BCL2L1, BIRC7, CEACAM1, CHEK1, FAS, FGF18, HMGB1, HSP90AB1, IL2, LEPR, MAPK8, MIF, MITF, NTRK1, NUP155, RAN, RPL31, RPL35A, RPL9, RPS28, RPS3, SFRP1, TGFBR1, THOC1, TNFRSF11B, TNFRSF13C, TNFRSF1B	29
Free Radical Scavenging	Synthesis of reactive oxygen species	5,48E-05		-0,667	ABCB1, APP, BCL2L1, C3, CFB, FAS, FFAR2, HMGB1, HSP90AB1, IL2, ITGA6, LDHA, LEPR, LTF, MAOB, MAP3K8, MAPK8, MIF, NPY, NTRK1, PINK1, PPARGC1A, PRKCA, PRSS23, S100A8, SELE, SLC9A3R1, SNAP23, TNFRSF11B	29
Cell Cycle	Mitosis	1,25E-04		-1,751	AHSG, BLM, CEACAM1, CHEK1, CLIP1, HNF4A, HNRNPU, IL2, KDM5B, MIF, MITF, MYBBP1A, NRG1, NTRK1, PF4, POGZ, PRKCA, PTCH1, PTMA, RAE1, RAN, REST, RGS14, RPS3, SLC9A3R1, TCERG1, TGFBR1, VEGFD, ZC3HC1	29
Cellular Development, Cellular Growth and Proliferation, Nervous System Development and Function, Tissue Development	Proliferation of neuronal cells	6,90E-04	Decreased	-2,242	ADNP, APP, ARHGAP17, CDH2, CDK5R1, DOK5, EPHB2, FAS, FGF18, FTO, GPM6A, HMGB1, ITGA6, MAP3K8, MAPK8, NPY, NRG1, NTRK1, PRKCA, PTCH1, RELN, REST, ROBO2, SEMA3A, SIX1, SRGAP2, TIAM1, TNK2, TRA	29
Digestive System Development and Function, Gastrointestinal Disease	Abnormal morphology of digestive system	1,50E-03			ABCB1, AGR2, C3, CEACAM1, CREB3L2, CXCR5, ENTPD2, EPHB2, FSTL3, GCNT3, GSC, IGF2R, IL2, ITGA6, KCNQ1, LHX2, MAP3K8, MAPK8, MAPK8IP1, MAT1A, MIF, PCSK2, PEX11A, PPARGC1A, SLC9A3R1, TFF3, TNFRSF11B, TNFRSF1B, TRA	29
Cellular Movement, Hematological System Development and Function, Immune Cell Trafficking	Cell movement of granulocytes	1,27E-06		1,615	APP, BLM, C2, C3, CAMK1D, CCL19, CCL28, CEACAM1, CFB, CXCR5, DEFB1, FAS, HMGB1, IL2, ITGA6, LBP, LTF, MAP3K8, NT5E, PF4, PLP1, PRKCA, S100A8, SAA1, SELE, SFRP1, SLPI, TNFRSF1B	28
Cellular Movement, Hematological System Development and Function, Immune Cell Trafficking	Cellular infiltration by leukocytes	3,09E-06		0,328	APP, BLM, C2, C3, CCL19, CFB, CXCR5, FAS, HMGB1, IL2, LBP, LTF, MAP3K8, MAT1A, MIF, NT5E, PF4, PLP1, PRKCA, PTMA, S100A10, S100A8, SAA1, SELE, SFRP1, SFTPC, TGFBR1, TNFRSF1B	28
Cancer, Cell Death and Survival, Organismal Injury and Abnormalities, Tumor Morphology	Necrosis of tumor	5,72E-05		0,112	ACLY, APP, BCL2L1, BIRC7, CEACAM1, CHEK1, FAS, FGF18, HMGB1, HSP90AB1, IL2, LEPR, MAPK8, MIF, MITF, NTRK1, NUP155, RAN, RPL31, RPL35A, RPL9, RPS28, RPS3, SFRP1, THOC1, TNFRSF11B, TNFRSF13C, TNFRSF1B	28
Cancer, Gastrointestinal Disease, Organismal Injury and Abnormalities	Colon tumor	2,63E-04		0,747	ABCB1, ACLY, BCL2L1, CACYBP, CEACAM1, CRIP1, EPHB2, FAS, GSTM1, HMGB1, HNF4A, IL2, ITGA6, LRP8, MAPK8, MIF, NRG1, NTRK1, PRSS23, PTMA, RAE1, SGK2, SLC7A5, TFF3, THOC1, TNS4, TTC38, USP53	28
Cancer, Organismal Injury and Abnormalities	Connective tissue tumor	2,63E-04		-0,961	ABCB1, BCL2L1, BLM, CDKN2C, CDKN2D, CHEK1, COL11A1, COL4A5, COL9A3, EPHB2, FAS, HMGB1, HSP90AB1, IGF2R, IL2, LEPR, MIF, NPM1, NT5E, NTRK1, PDGFD, PINK1, PLAC8, PRKCA, PTCH1, S100A10, SFRP1, TNFRSF1B	28
Connective Tissue Disorders, Hereditary Disorder, Organismal Injury and Abnormalities	Hereditary connective tissue disorder	3,09E-04		-0,106	ADAMTSL2, ATP6V0A2, C2CD3, CALCR, COCH, COL11A1, COL4A5, COL9A3, CREB3L2, FTO, GSC, HCST, HNRNPA1, HNRNPA2B1, ITGA6, LEMD3, LEPR, MITF, NT5E, PHC1, PTCH1, RPS28, SIX1, SLC9A3R1, SOX5, TGFBR1, TNFRSF11B, TTC21B	28
Hematological System Development and Function, Lymphoid Tissue Structure and Development, Tissue Morphology	Quantity of T lymphocytes	1,05E-03		0,482	ABCB1, APP, BCL2A1, BCL2L1, BLM, CCL19, CD247, CDKN2C, DKC1, FAS, GNLY, HCST, IGF2R, IL2, ITGA6, LEPR, MAP3K8, MAPK8, MIF, NPY, PHC1, PLP1, SAA1, SELE, TGFBR1, TNFRSF11B, TNFRSF1B, TRA	28
Hereditary Disorder, Neurological Disease, Organismal Injury and Abnormalities, Psychological Disorders, Skeletal and Muscular Disorders	Huntington's Disease	1,70E-03			ACAT1, ADCY2, BCL2L1, C3, CDH2, CDK5R1, CHAF1B, COCH, CPNE5, EPHB2, HNRNPDL, HNRNPU, LDHA, MAOB, NPM1, NPY, PDLIM1, PPARGC1A, PTPRE, RANBP1, RASL12, RGS14, RTN2, SCUBE2, SYNPR, TCERG1, TMEFF1, ZNF385B	28
Cellular Movement, Hematological System Development and Function, Immune Cell Trafficking	Cell movement of lymphocytes	1,43E-05		1,819	APP, C3, CCL19, CCL28, CD247, CEACAM1, CXCR5, DEFB1, FAS, GNLY, IL2, IL37, ITGA6, LCP1, MIF, MYADM, NT5E, PF4, SAA1, SELE, SEMA3A, SMPD2, STAP2, TGFBR1, TIAM1, TNFRSF1B, TNK2	27
Cell-To-Cell Signaling and Interaction	Binding of blood cells	3,21E-05		1,240	ADGRB1, APP, C3, CCL19, CCL28, CEACAM1, FAS, HMGB1, IL2, ITGA6, LBP, LCP1, LRP8, LTF, MIF, MITF, MYADM, NPY, NT5E, PF4, S100A8, SAA1, SELE, SEMA3A, STAP2, TGFBR1, TNFRSF11B	27
Cellular Function and Maintenance	Engulfment of cells	5,44E-05		0,718	ADAMTS5, ADGRB1, AHSG, AMPH, APP, C3, CAMK1D, CCL19, CLIP1, CLIP3, EPN2, FAS, FGD4, HMGB1, IL2, LEPR, MAPK8, MIF, NPM1, NPY, NTRK1, PF4, PRKCA, S100A10, SAA1, SNAP23, TGFBR1	27
Cancer, Cell Death and Survival, Organismal Injury and Abnormalities, Tumor Morphology	Cell death of tumor cells	9,73E-05		0,112	ACLY, APP, BCL2L1, BIRC7, CEACAM1, CHEK1, FAS, FGF18, HMGB1, HSP90AB1, IL2, LEPR, MAPK8, MIF, MITF, NTRK1, NUP155, RAN, RPL31, RPL35A, RPL9, RPS28, RPS3, SFRP1, THOC1, TNFRSF11B, TNFRSF13C	27
Protein Synthesis	Synthesis of protein	1,11E-04		-1,598	APP, C3, CCL19, CDKL2, DKC1, EIF3A, FAS, IL2, ILF3, MAP3K8, MAPK8IP1, MYBBP1A, NPM1, NPPC, NPY, NRG1, PABPC4, PINK1, PPARGC1A, PRKCA, RBM4B, RELN, RPS3, RPS4X, SHMT1, SOX4, TPR	27
Cancer, Gastrointestinal Disease, Organismal Injury and Abnormalities	Colon cancer	1,48E-04		0,747	ABCB1, ACLY, BCL2L1, CACYBP, CEACAM1, CRIP1, EPHB2, FAS, GSTM1, HMGB1, HNF4A, IL2, ITGA6, LRP8, MAPK8, MIF, NRG1, NTRK1, PRSS23, PTMA, RAE1, SGK2, SLC7A5, TFF3, TNS4, TTC38, USP53	27
Cancer, Endocrine System Disorders, Organismal Injury and Abnormalities, Reproductive System Disease	Ovarian Cancer and Tumors	2,22E-04			ABCB1, AGR2, ATP6V1B1, BCL2L1, CDKN2C, CDKN2D, CFB, CHEK1, COL11A1, EYA2, FAS, FGF18, GSTM1, HSP90AB1, KLK10, LRP8, MAPK8IP1, NRG1, NT5E, PF4, SLPI, SSRP1, TFF3, TGFBR1, THOC1, TRA2A, WFDC2	27
Molecular Transport	Quantity of metal	3,93E-04		1,506	ANXA6, APP, ATP2C2, ATP6V1B1, BCL2L1, C3, CALCR, CCL19, CD247, CXCR5, ENTPD2, FAS, FFAR2, HNF4A, IL2, LTF, MARCKSL1, MXD3, NPPC, NPY, NTRK1, S100A8, SAA1, SELE, SLC39A10, SLC9A3R1, TNFRSF11B	27
Nervous System Development and Function, Neurological Disease	Abnormal morphology of central nervous system	5,89E-04			APP, C3, CD247, CDK5R1, CDKN2C, CUX2, EFNA3, EPHB2, GSC, HIRA, ITGA6, LHX2, LRP8, MAPK8IP1, MARCKSL1, PHYH, PINK1, PLP1, PPARGC1A, PTCH1, REST, ROBO2, SEMA3A, SLC2A8, SUN2, TNFRSF1B, TTPA	27
Cancer, Organismal Injury and Abnormalities	Head and neck carcinoma	6,86E-04			BCL2L1, CA1, CIP2A, COCH, COL11A1, FCGBP, GSTM1, HSP90AB1, IL2, ITGA6, ITGA8, LDHA, MAPK8IP1, MAPKAP1, NPM1, NRG1, NTRK1, PDGFD, PTCH1, PTPRE, RAB25, RASAL1, ROBO2, SERPINB13, TFF3, TGFBR1, TIAM1	27
Tissue Development	Development of epithelial tissue	1,28E-03		0,180	ADGRB1, APP, ATP6V0A2, C3, CDH2, CEACAM1, COL4A5, DDAH1, HMGB1, LEPR, LHX2, MAPK8, MITF, NDP, NRG1, NTRK1, PF4, PRKCA, RAB25, S100A8, SAA1, SEMA3A, TGFBR1, TNFRSF11B, TRA, VEGFD, ZC3H13	27
Infectious Diseases	Replication of virus	1,71E-03		-0,876	AMPH, ANXA6, BCL2L1, CEACAM1, EIF3A, EPHB2, HMGB1, HNF4A, HNRNPM, HSP90AB1, IL2, ILF3, MAP1LC3A, NPM1, PIK3R4, PINK1, PPARGC1A, PRKCA, RAE1, S100A8, SLC9A3R1, SLPI, SNW1, SSRP1, TNK2, TRA, UBE2E2	27
Free Radical Scavenging	Production of reactive oxygen species	4,53E-06		-0,426	ABCB1, APP, BCL2L1, C3, CFB, FAS, FFAR2, HMGB1, HSP90AB1, IL2, LDHA, LTF, MAOB, MAP3K8, MAPK8, NPY, NTRK1, PINK1, PPARGC1A, PRKCA, PRSS23, S100A8, SELE, SLC9A3R1, SNAP23, TNFRSF11B	26
Cell-To-Cell Signaling and Interaction	Adhesion of blood cells	9,62E-06		0,918	ADGRB1, APP, C3, CCL19, CCL28, CEACAM1, FAS, HMGB1, IL2, ITGA6, LBP, LCP1, LRP8, LTF, MIF, MITF, MYADM, NPY, NT5E, PF4, S100A8, SAA1, SELE, STAP2, TGFBR1, TNFRSF11B	26
Cancer, Cell Death and Survival, Organismal Injury and Abnormalities	Cell death of malignant tumor	1,18E-05		0,031	ACLY, APP, BCL2L1, CHEK1, FAS, FGF18, HMGB1, HSP90AB1, IL2, LEPR, MAPK8, MIF, MITF, NTRK1, NUP155, RAN, RPL31, RPL35A, RPL9, RPS28, RPS3, SFRP1, TGFBR1, TNFRSF11B, TNFRSF13C, TNFRSF1B	26
Cellular Function and Maintenance	Endocytosis	8,34E-04		0,030	ADAMTS5, ADGRB1, AMPH, ANXA6, APP, C3, CCL19, CLIP1, CLIP3, EPN2, FAS, FGD4, HMGB1, IGF2R, IL2, LEPR, LRP8, MIF, NPM1, NTRK1, PF4, PRKCA, S100A10, SAA1, SNAP23, TGFBR1	26
Cell Morphology, Nervous System Development and Function, Neurological Disease, Tissue Morphology	Abnormal morphology of neurons	1,38E-03			APP, ATP13A2, C3, CDK5R1, CLIP3, EPHB2, HNRNPA2B1, IL37, KCNQ1, LEPR, LRP8, MAOB, MAPK8IP1, MIF, NTRK1, PHYH, PINK1, PLP1, PPARGC1A, PRSS12, ROBO2, SEMA3A, SLC26A4, SOX4, SUN2, TRA	26
Nutritional Disease	Obesity	1,69E-03		0,401	AGRP, AHSG, ANGPTL6, APP, BCAT2, BCL2L1, C3, CA1, CA5B, CEACAM1, FTO, GPAT4, LBP, LEPR, LPIN2, MAOB, MAPK8, NPY, NPY5R, PDE11A, PEX11A, PPARGC1A, PTER, SDC3, SMPD2, TNFRSF1B	26
Nervous System Development and Function	Sensory system development	1,72E-03		-0,263	ATP8A2, CD247, CDH2, EPHB2, FTO, GPR143, HOXB3, ITGA6, KIF5C, LHX2, LMO7, LRP8, MAPK8, MARCKSL1, MIF, MITF, NDP, NPM1, NTRK1, PHC1, SIX1, SOX4, TNFRSF1B, TTPA, VEGFD, WNT2B	26
Cell Death and Survival, Organismal Injury and Abnormalities, Renal and Urological Disease	Cell death of kidney cells	7,34E-06		0,042	APP, ATP13A2, BCL2A1, BCL2L1, CALCR, CCNI, EMP1, EPHB2, FAS, GNB2, IL2, LDHA, MAP1LC3A, MAP3K8, MAPK8, MIF, NTRK1, PINK1, PRKCA, PTCH1, SFRP1, SLC47A1, SSRP1, TIAM1, TNFRSF1B	25
Cancer, Cell Death and Survival, Organismal Injury and Abnormalities, Tumor Morphology	Necrosis of malignant tumor	3,22E-05		0,031	ACLY, APP, BCL2L1, CHEK1, FAS, FGF18, HMGB1, HSP90AB1, IL2, LEPR, MAPK8, MIF, MITF, NTRK1, NUP155, RAN, RPL31, RPL35A, RPL9, RPS28, RPS3, SFRP1, TNFRSF11B, TNFRSF13C, TNFRSF1B	25
Cell Signaling, Molecular Transport, Vitamin and Mineral Metabolism	Quantity of Ca2+	5,83E-05		1,680	ANXA6, APP, ATP2C2, ATP6V1B1, BCL2L1, C3, CALCR, CCL19, CD247, CXCR5, ENTPD2, FAS, FFAR2, HNF4A, IL2, MARCKSL1, MXD3, NPPC, NPY, NTRK1, S100A8, SAA1, SELE, SLC9A3R1, TNFRSF11B	25
Cellular Development, Cellular Growth and Proliferation, Connective Tissue Development and Function	Proliferation of fibroblast cell lines	2,50E-04		-0,569	ACAT1, BCL2L1, BLM, CEACAM1, CHEK1, FGF18, HMGB1, HOXB3, IRS4, MAPK8, MIF, MITF, NPM1, NPY, NTRK1, PDGFD, PELP1, PLAC8, PRKCA, PTMA, RAN, SHMT1, SIX1, STAP2, TPR	25
Cancer, Organismal Injury and Abnormalities	Growth of malignant tumor	3,65E-04		1,159	BCL2L1, CACYBP, CEACAM1, CHEK1, EPHB2, FGF18, FHL1, GPC5, HMGB1, IL2, LDHA, LEPR, MIF, NPM1, NPY, NRG1, NT5E, PRKCA, PTCH1, RPS4X, S100A10, SFRP1, SIX1, TFF3, TGFBR1	25
Cell Death and Survival	Apoptosis of leukocytes	4,89E-04		0,426	APP, BCL2A1, BCL2L1, BLM, CCL19, CD247, CHEK1, FAS, GP2, HMGB1, HSP90AB1, IL2, LEPR, LTF, MAPK8, MIF, PF4, PRKCA, S100A8, SLC39A10, SLPI, SOX4, STAP2, TNFRSF1B, TPR	25
Behavior	Cognition	1,13E-03		-0,134	ACAT1, ADNP, AMPH, APP, ATP13A2, C3, CDK5R1, CUX2, EPHB2, FTO, IGF2R, ITGA8, LEPR, LRP8, NPY, NRG1, NT5E, NTRK1, PDE11A, PLP1, PPARGC1A, PRKCA, RELN, RGS14, TNFRSF1B	25
Cellular Movement	Infiltration by myeloid cells	2,80E-06		0,125	APP, BLM, C2, C3, CCL19, CFB, CXCR5, FAS, HMGB1, LBP, MAP3K8, MIF, NPM1, NT5E, PF4, PLP1, PRKCA, PTMA, S100A10, SAA1, SELE, SFRP1, SFTPC, TNFRSF1B	24
Cellular Movement, Hematological System Development and Function, Immune Cell Trafficking	Lymphocyte migration	2,86E-05		1,745	APP, C3, CCL19, CCL28, CD247, CEACAM1, CXCR5, DEFB1, FAS, GNLY, IL2, IL37, ITGA6, LCP1, MIF, MYADM, NT5E, SAA1, SELE, SEMA3A, SMPD2, STAP2, TNFRSF1B, TNK2	24
Cell-To-Cell Signaling and Interaction, Hematological System Development and Function, Immune Cell Trafficking, Inflammatory Response	Activation of phagocytes	4,84E-05		0,353	APP, C3, CXCR5, FAS, GNLY, HMGB1, HNF4A, IL2, IL37, LBP, LTF, MAOB, MIF, NPY, NRG1, PF4, PRKCA, PTPRE, S100A8, SAA1, SELE, SFRP1, SLPI, TNFRSF1B	24
Cancer, Cell Death and Survival, Organismal Injury and Abnormalities, Tumor Morphology	Cell death of cancer cells	7,97E-05		0,031	ACLY, APP, BCL2L1, CHEK1, FAS, FGF18, HMGB1, HSP90AB1, IL2, LEPR, MAPK8, MIF, MITF, NTRK1, NUP155, RAN, RPL31, RPL35A, RPL9, RPS28, RPS3, SFRP1, TNFRSF11B, TNFRSF13C	24
Cell-To-Cell Signaling and Interaction, Hematological System Development and Function	Interaction of leukocytes	1,04E-04		1,365	ADGRB1, APP, C3, CCL19, CCL28, FAS, HMGB1, IL2, ITGA6, LBP, LCP1, LTF, MIF, MITF, MYADM, NPY, NT5E, PF4, S100A8, SAA1, SELE, STAP2, TGFBR1, TNFRSF11B	24
DNA Replication, Recombination, and Repair	Metabolism of DNA	1,07E-04		-1,088	ABCB1, APP, BCL2L1, BIRC7, BLM, CACYBP, CHEK1, FAS, HMGB1, HNRNPA1, IL2, MAP1LC3A, MAPK8, NPM1, NPPC, NRG1, NT5E, PPARGC1A, RAN, SSRP1, TFF3, THOC1, TIAM1, XRN2	24
Endocrine System Development and Function, Molecular Transport, Small Molecule Biochemistry	Concentration of hormone	1,24E-04		-0,025	AGRP, AHSG, ANGPTL6, APP, BCAT2, C3, CDKN2C, CDKN2D, CEACAM1, FFAR2, FSTL3, FTO, GPD2, IGF2R, IGSF1, KDM5B, LEPR, MAPK8, NPY, PCSK2, PPARGC1A, PRKCA, SDC3, SLC2A8	24
Cancer, Organismal Injury and Abnormalities	Sarcoma	3,88E-04		-0,978	BCL2L1, BLM, CDKN2C, CDKN2D, CHEK1, EPHB2, FAS, HMGB1, HSP90AB1, IGF2R, IL2, LEPR, MIF, NPM1, NT5E, NTRK1, PDGFD, PINK1, PLAC8, PRKCA, PTCH1, S100A10, SFRP1, TNFRSF1B	24
Cell Death and Survival	Cell death of fibroblast cell lines	4,99E-04		1,083	ABCB1, APP, BCL2A1, BCL2L1, BLM, CHEK1, FAS, GNB2, HNRNPA1, ITGA6, MAP3K8, MAPK8, MAPKAP1, NTRK1, PINK1, PLAC8, PRKCA, RAB25, RAI14, SMPD2, SUN2, THOC1, TIAM1, TNFRSF1B	24
Behavior	Learning	6,51E-04		0,148	ACAT1, ADNP, AMPH, APP, ATP13A2, C3, CDK5R1, CUX2, EPHB2, FTO, IGF2R, ITGA8, LEPR, LRP8, NPY, NRG1, NT5E, NTRK1, PDE11A, PPARGC1A, PRKCA, RELN, RGS14, TNFRSF1B	24
Cell Death and Survival	Apoptosis of neurons	9,23E-04		-0,333	ADNP, APP, BCL2L1, CDK5R1, CDKN2D, EPHB2, FAS, HSP90AB1, MAPK8, MAPK8IP1, MIF, NDP, NPM1, NTRK1, PINK1, PPARGC1A, PTCH1, RPS3, SIX1, SMPD2, SOX4, TNFRSF1B, USP53, WNK3	24
Nervous System Development and Function, Neurological Disease, Organ Morphology, Organismal Development, Organismal Injury and Abnormalities	Abnormal morphology of brain	1,43E-03			APP, C3, CD247, CDK5R1, CDKN2C, CUX2, EFNA3, EPHB2, GSC, HIRA, ITGA6, LHX2, LRP8, MAPK8IP1, MARCKSL1, PHYH, PINK1, PPARGC1A, PTCH1, REST, ROBO2, SEMA3A, SLC2A8, SUN2	24
Cancer, Cellular Development, Cellular Growth and Proliferation, Organismal Injury and Abnormalities, Tumor Morphology	Proliferation of tumor cells	1,53E-03		1,274	ACLY, BCL2L1, CACYBP, CEACAM1, CHEK1, FAS, FGF18, FHL1, GPC5, HMGB1, IL2, LDHA, MIF, NPM1, NRG1, PRKCA, PTCH1, PTPRE, RPS4X, SFRP1, SIX1, SLPI, TFF3, TGFBR1	24
Lipid Metabolism, Molecular Transport, Small Molecule Biochemistry	Accumulation of lipid	6,58E-06		0,463	ACAT1, ACSL1, ANGPTL6, APP, BCL2L1, CCL19, CEACAM1, FAS, HMGB1, IGF2R, IL2, LEPR, LPIN2, MAPK8, MIF, NPPC, NPY, NRG1, PPARGC1A, SAA1, SFTPC, SLC2A8, SMPD2	23
Cellular Movement, Hematological System Development and Function, Immune Cell Trafficking, Inflammatory Response	Cell movement of neutrophils	7,42E-06		1,247	APP, BLM, C2, C3, CAMK1D, CCL19, CFB, DEFB1, FAS, HMGB1, ITGA6, LBP, MAP3K8, NT5E, PF4, PLP1, PRKCA, S100A8, SAA1, SELE, SFRP1, SLPI, TNFRSF1B	23
Organismal Development	Mass of organism	3,06E-05		0,335	AGRP, APP, BLM, C3, CA5B, FTO, GPAT4, GPD2, HMGB1, IGSF1, IL2, KDM5B, LEPR, MAOB, MAPK8, NPPC, NPY, NPY5R, PHYH, PTCH1, RDH16, SELE, TNFRSF1B	23
Cell-To-Cell Signaling and Interaction, Hematological System Development and Function, Immune Cell Trafficking	Adhesion of immune cells	5,80E-05		1,013	ADGRB1, APP, C3, CCL19, CCL28, FAS, HMGB1, IL2, ITGA6, LBP, LCP1, LTF, MIF, MITF, MYADM, NPY, NT5E, PF4, S100A8, SELE, STAP2, TGFBR1, TNFRSF11B	23
Cell-To-Cell Signaling and Interaction, Nervous System Development and Function	Neurotransmission	5,17E-04		0,822	ADNP, AMPH, APP, CALM1 (includes others), CD247, CDH2, EPHB2, FGD4, KCNQ1, KCNT2, LRP8, MAOB, MAPK8IP1, NPY, NPY5R, PCDH17, PHYH, PLP1, PNKD, PRKCA, RELN, TNFRSF1B, USP53	23
Cancer, Gastrointestinal Disease, Organismal Injury and Abnormalities	Tumorigenesis of digestive organ tumor	6,01E-04			ABCB1, ACLY, BCL2L1, CACYBP, CDH2, CEACAM1, FAS, GSTM1, HMGB1, HSP90AB1, IGF2R, IL2, ITGA6, LRP8, MAPK8, MAPK8IP1, MIF, NTRK1, OSBPL1A, PTCH1, PTMA, TTC3, WDHD1	23
Cancer, Endocrine System Disorders, Organismal Injury and Abnormalities, Reproductive System Disease	Ovarian cancer	9,52E-04			ABCB1, AGR2, ATP6V1B1, BCL2L1, CDKN2C, CFB, CHEK1, COL11A1, EYA2, FAS, FGF18, GSTM1, HSP90AB1, KLK10, LRP8, MAPK8IP1, PF4, SLPI, SSRP1, TFF3, TGFBR1, TRA2A, WFDC2	23
Hematological System Development and Function, Inflammatory Response, Tissue Morphology	Quantity of phagocytes	1,34E-03		-0,092	ABCB1, ACAT1, AGR2, BCL2A1, C3, CCL19, FAS, GNLY, HMGB1, IL2, IL37, LEPR, MIF, NPY, PI3, PLAC8, PLP1, S100A8, SELE, SLPI, TGFBR1, TNFRSF11B, TNFRSF1B	23
Cellular Movement, Hematological System Development and Function, Immune Cell Trafficking, Inflammatory Response	Cellular infiltration by phagocytes	2,48E-06		0,586	APP, BLM, C2, C3, CCL19, CFB, FAS, HMGB1, LBP, MAP3K8, MIF, NT5E, PF4, PLP1, PRKCA, PTMA, S100A10, SAA1, SELE, SFRP1, SFTPC, TNFRSF1B	22
Cell Death and Survival, Organismal Injury and Abnormalities	Cell death of epithelial cell lines	6,52E-06		0,222	APP, ATP13A2, BCL2A1, BCL2L1, CALCR, EMP1, EPHB2, FAS, LDHA, MAP3K8, MAPK8, MIF, NTRK1, PINK1, PTCH1, SFRP1, SLC47A1, SSRP1, TGFBR1, TIAM1, TNFRSF11B, TNFRSF1B	22
Cellular Movement, Hematological System Development and Function, Immune Cell Trafficking, Inflammatory Response	Chemotaxis of leukocytes	3,01E-04	Increased	2,348	APP, C3, CAMK1D, CCL19, CCL28, CXCR5, DEFB1, GNLY, HMGB1, IL2, LBP, LCP1, MIF, PF4, PRKCA, S100A8, SAA1, SELE, SLPI, TIAM1, TRA, VEGFD	22
DNA Replication, Recombination, and Repair	Synthesis of DNA	1,10E-03		0,821	ADCY2, APP, BCL2L1, CDKN2C, CDKN2D, CEACAM1, CHEK1, ELL3, HIRA, HNRNPA1, IL2, MAP3K8, MAPK8, MAPK8IP1, MIF, NPPC, NRG1, NTRK1, PDGFD, PRKCA, PTPRE, SMPD2	22
Cellular Development, Connective Tissue Development and Function, Tissue Development	Differentiation of bone cells	2,03E-03		-0,351	C3, CALCR, CEACAM1, FAS, FGF18, FSTL3, HCST, HIRA, HNRNPU, LRP8, LTF, MITF, MYBBP1A, NPPC, PTCH1, PTPRE, S100A8, SCUBE2, SEMA3A, SFRP1, TNFRSF11B, VEGFD	22
Cell Death and Survival, Organismal Injury and Abnormalities	Apoptosis of epithelial cells	1,54E-05		-0,009	APP, BCL2A1, BCL2L1, CDH2, CEACAM1, CHEK1, FAS, HMGB1, HNF4A, IL2, ITGA6, MAPK8, MIF, MITF, NPM1, PPARGC1A, PRKCA, SAA1, SFRP1, TFF3, TNFRSF1B	21
Molecular Transport	Export of molecule	1,88E-05		-1,707	ABCB1, ACAT1, ACSL1, ANXA6, APP, FAS, HNRNPA2B1, NPPC, NRG1, NUP155, PTCH1, RAE1, RAN, RELN, S100A8, SAA1, SLC26A4, SLC47A1, SLC7A5, THOC1, TPR	21
Cell Death and Survival, Organismal Injury and Abnormalities, Renal and Urological Disease	Cell death of kidney cell lines	5,22E-05		-0,358	APP, ATP13A2, BCL2A1, BCL2L1, CALCR, EMP1, EPHB2, FAS, GNB2, LDHA, MAP3K8, MAPK8, MIF, NTRK1, PINK1, PRKCA, PTCH1, SLC47A1, SSRP1, TIAM1, TNFRSF1B	21
Cell Death and Survival	Apoptosis of fibroblast cell lines	1,15E-04		0,647	ABCB1, APP, BCL2A1, BCL2L1, BLM, CHEK1, FAS, GNB2, HNRNPA1, ITGA6, MAP3K8, MAPK8, MAPKAP1, NTRK1, PINK1, PLAC8, PRKCA, RAI14, SUN2, THOC1, TIAM1	21
Nervous System Development and Function	Sensation	1,53E-04		0,853	ATP6V0A4, ATP6V1B1, CDK5R1, CDKN2D, COCH, COL11A1, ENTPD2, KCNQ1, KCNT2, LMO7, MIF, NDP, NPPC, NTRK1, PCSK2, SEMA3A, SIX1, SLC26A4, SLC9A3R1, TSPEAR, USP53	21
Behavior, Digestive System Development and Function	Feeding	1,08E-04		-0,973	AGRP, APP, ASL, ATP8A2, BCAT2, C3, EFNA3, FTO, GPD2, GSC, ILF3, LEPR, MAPK8, NPY, NPY5R, PPARGC1A, SDC3, SEMA3A, TNFRSF1B, VEGFD	20
Cell Death and Survival	Cell death of leukemia cell lines	2,78E-04		0,998	ABCB1, BCL2A1, BCL2L1, BIRC7, CD247, CEACAM1, FAS, GNLY, HCST, LEPR, MAPK8, MAPK8IP1, NPM1, PRKCA, PTPRE, S100A8, SMPD2, STAP2, TNFRSF11B, TRA	20
Cell-To-Cell Signaling and Interaction, Cellular Movement, Hematological System Development and Function, Immune Cell Trafficking	Recruitment of leukocytes	3,34E-04		-0,014	APP, C3, CCL19, CCL28, COCH, HMGB1, IL2, IL37, LTF, MAP3K8, MAPK8, MIF, S100A8, SELE, SEMA3A, SFRP1, SLPI, STAP2, TNFRSF1B, TRA	20
Tissue Development	Accumulation of cells	4,23E-04		1,348	AGRP, BCL2A1, C3, CCL28, CHEK1, CUL5, FAS, HMGB1, IL2, ITGA6, LRP8, MAP3K8, MAPK8, MIF, NT5E, PRKCA, S100A8, SELE, SLPI, TNFRSF1B	20
Cancer, Gastrointestinal Disease, Organismal Injury and Abnormalities	Intestinal carcinoma	5,18E-04			ABCB1, ACLY, BCL2L1, CACYBP, CEACAM1, COCH, FAS, GSTM1, HMGB1, HSP90AB1, IL2, ITGA6, LRP8, MAPK8IP1, MIF, NTRK1, OSBPL1A, PTCH1, PTMA, WDHD1	20
Cell-To-Cell Signaling and Interaction, Hematological System Development and Function	Activation of myeloid cells	6,66E-04		0,427	APP, C3, CXCR5, HMGB1, HNF4A, IL2, IL37, LBP, LTF, MAOB, MIF, NPY, NRG1, PF4, PTPRE, S100A8, SAA1, SELE, SFRP1, SLPI	20
Cell Death and Survival	Cell death of breast cancer cell lines	8,97E-04		0,023	BCL2L1, CD247, CEACAM1, CHEK1, ELF5, FAS, HCST, MAPK8, MIF, MYBBP1A, NRG1, PELP1, PI3, PINK1, PRKCA, SFRP1, SSRP1, TGFBR1, THOC1, TNS4	20
Cell Death and Survival, Embryonic Development	Cell death of embryonic cell lines	1,77E-03		-0,838	APP, ATP13A2, BCL2A1, BCL2L1, CALCR, EMP1, EPHB2, FAS, HNRNPA1, LDHA, MAP3K8, MAPK8, MIF, PINK1, PTCH1, SLC47A1, SSRP1, SUN2, THOC1, TNFRSF1B	20
Cell-mediated Immune Response, Cellular Movement, Hematological System Development and Function, Immune Cell Trafficking	T cell migration	4,77E-05	Increased	2,187	APP, C3, CCL19, CCL28, CD247, CEACAM1, CXCR5, DEFB1, FAS, GNLY, IL2, ITGA6, LCP1, MIF, SAA1, SELE, SEMA3A, SMPD2, TNK2	19
Behavior, Nervous System Development and Function	Memory	7,04E-05		-0,310	ACAT1, ADNP, APP, C3, CDK5R1, CUX2, FTO, IGF2R, ITGA8, LEPR, NPY, NRG1, NT5E, NTRK1, PDE11A, PPARGC1A, RELN, RGS14, TNFRSF1B	19
Cellular Movement, Hematological System Development and Function, Immune Cell Trafficking, Inflammatory Response	Migration of phagocytes	8,49E-05		1,238	APP, C3, CCL19, CEACAM1, DEFB1, FAS, HMGB1, IL2, ITGA6, MIF, NPM1, NPY, S100A10, S100A8, SAA1, SELE, SEMA3A, SLPI, STAP2	19
Cell-To-Cell Signaling and Interaction, Cellular Movement	Recruitment of myeloid cells	8,49E-05		-0,565	APP, C3, CCL19, COCH, HMGB1, IL2, IL37, LTF, MAP3K8, MAPK8, MIF, S100A8, SELE, SEMA3A, SFRP1, SLPI, STAP2, TNFRSF1B, TRA	19
Cellular Movement	Chemotaxis of myeloid cells	2,85E-04	Increased	2,122	APP, C3, CAMK1D, CCL19, CCL28, DEFB1, GNLY, HMGB1, IL2, LBP, MIF, PF4, PRKCA, S100A8, SAA1, SELE, SLPI, TRA, VEGFD	19
RNA Post-Transcriptional Modification	Processing of RNA	3,14E-04			APP, DKC1, HNRNPA0, HNRNPA1, HNRNPA2B1, HNRNPM, HNRNPU, NOL8, NPM1, PABPC4, PPARGC1A, RPL35A, RPS28, SNW1, TCERG1, THOC1, TRA2A, WDHD1, XRN2	19
Cellular Function and Maintenance, Inflammatory Response	Phagocytosis	7,50E-04		1,968	ADGRB1, AHSG, AMPH, APP, C3, CAMK1D, CLIP1, FAS, HMGB1, IL2, LEPR, MAPK8, MIF, NPM1, NPY, PF4, PRKCA, SAA1, SNAP23	19
Nutritional Disease	Weight gain	1,05E-03		1,049	AGRP, AHSG, APP, C3, CA1, CA5B, CDKN2C, EPN2, GPD2, IGF2R, IGSF1, IL2, LEPR, MAPK8, NPPC, NPY, PEX11A, PPARGC1A, RDH16	19
Organismal Injury and Abnormalities, Tissue Morphology	Size of lesion	1,67E-03			ACAT1, APP, C3, CCL19, FAS, FSTL3, HMGB1, IL2, LDHA, MIF, NT5E, PF4, PPARGC1A, SELE, SIX1, TGFBR1, TNFRSF11B, TNFRSF1B, VEGFD	19
Respiratory System Development and Function	Respiratory system development	1,80E-03			FAS, FGF18, GSC, IGF2R, ITGA6, ITGA8, LHX2, MAPK8, PCSK5, PHF14, PPARGC1A, PTCH1, SELE, SFTPC, SIX1, SOX4, TCF21, TGFBR1, TNFRSF1B	19
Cell Death and Survival	Cell death of phagocytes	6,72E-06	Decreased	-2,152	ACAT1, APP, BCL2A1, BCL2L1, CCL19, FAS, HMGB1, HSP90AB1, IL2, LEPR, LTF, MAPK8, MIF, PF4, RAN, S100A8, SLPI, TNFRSF1B	18
Cellular Movement	Cellular infiltration by myeloid cells	1,88E-05		-0,169	BLM, C2, C3, CCL19, CFB, CXCR5, FAS, HMGB1, LBP, MAP3K8, NPM1, NT5E, PF4, PLP1, PRKCA, SELE, SFRP1, TNFRSF1B	18
Cell-mediated Immune Response, Cellular Movement, Hematological System Development and Function, Immune Cell Trafficking	Cell movement of T lymphocytes	2,96E-05		1,959	APP, C3, CCL19, CCL28, CD247, CXCR5, DEFB1, FAS, GNLY, IL2, ITGA6, LCP1, MIF, SAA1, SELE, SEMA3A, SMPD2, TNK2	18
Digestive System Development and Function, Organ Morphology, Organismal Development	Morphology of intestine	5,38E-05			ABCB1, AGR2, APP, C3, CEACAM1, CXCR5, EPHB2, FGF18, GCNT3, IL2, ITGA6, MAP3K8, MAPK8, PPARGC1A, SLC9A3R1, TFF3, TNFRSF1B, TRA	18
Cell-To-Cell Signaling and Interaction, Cellular Movement, Hematological System Development and Function, Immune Cell Trafficking, Inflammatory Response	Recruitment of phagocytes	7,44E-05		-0,661	APP, CCL19, COCH, HMGB1, IL2, IL37, LTF, MAP3K8, MAPK8, MIF, S100A8, SELE, SEMA3A, SFRP1, SLPI, STAP2, TNFRSF1B, TRA	18
Cellular Assembly and Organization	Formation of cellular membrane	2,89E-04	Decreased	-3,275	ADGRB1, ADGRL1, ADNP, APP, CBLN2, CDH2, COL4A5, CUX2, EPHB2, GPM6A, ITGA6, LRRC4B, NRG1, NTRK1, PEX11A, PRKCA, SIX1, SUN2	18
Cell-To-Cell Signaling and Interaction, Cellular Function and Maintenance, Inflammatory Response	Phagocytosis of cells	5,35E-04		1,899	ADGRB1, AHSG, APP, C3, CAMK1D, CLIP1, FAS, HMGB1, IL2, LEPR, MAPK8, MIF, NPM1, NPY, PF4, PRKCA, SAA1, SNAP23	18
Cell Death and Survival	Cell death of brain	6,05E-04		-0,766	ADNP, APP, ATP13A2, BCL2L1, CDK5R1, CDKN2D, FAS, HMGB1, MAPK8, MIF, NPM1, NTRK1, PPARGC1A, REST, RPS3, SEMA3A, TCERG1, WNK3	18
Respiratory System Development and Function	Morphology of respiratory system	1,12E-03			CLIP3, FAS, FGF18, GSC, HOXB3, IGF2R, ILF3, ITGA6, ITGA8, MAPK8, PHF14, PPARGC1A, SELE, SFTPC, SIX1, SOX4, TCF21, TRA	18
Lipid Metabolism, Small Molecule Biochemistry	Synthesis of fatty acid	1,36E-03		-1,560	ACAT1, ACLY, ACSL1, APP, CEACAM1, ELOVL6, HNF4A, LEPR, LTF, MAP3K8, MAPK8, MIF, MITF, NRG1, PLP1, PPARGC1A, PRKCA, SEMA3A	18
Cancer, Gastrointestinal Disease, Organismal Injury and Abnormalities	Large intestine carcinoma	1,43E-03			ABCB1, ACLY, BCL2L1, CACYBP, CEACAM1, COCH, FAS, GSTM1, HMGB1, IL2, ITGA6, LRP8, MAPK8IP1, MIF, NTRK1, OSBPL1A, PTMA, WDHD1	18
Cell-To-Cell Signaling and Interaction, Hematological System Development and Function, Immune Cell Trafficking, Inflammatory Response	Activation of antigen presenting cells	1,72E-03		-0,025	APP, C3, CXCR5, FAS, GNLY, HMGB1, HNF4A, IL2, IL37, LBP, LTF, MAOB, MIF, NPY, NRG1, PRKCA, SLPI, TNFRSF1B	18
Cancer, Organismal Injury and Abnormalities	Incidence of tumor	1,77E-03		-0,297	BLM, CDH2, CDKN2C, CEACAM1, FAS, HCST, IL2, LMO7, LTF, MAP3K8, MAPK8, MIF, PCSK2, PPARGC1A, PRKCA, PTCH1, RAE1, TNFRSF1B	18
Organismal Development	Size of head	3,19E-05			APP, CDK5R1, CDKN2C, CUX2, EPHB2, FTO, GSC, IGF2R, KIF5C, LRP8, MARCKSL1, NPPC, PPARGC1A, PTCH1, SEMA3A, SIX1, TNFRSF1B	17
Cellular Movement, Hematological System Development and Function, Immune Cell Trafficking	Cellular infiltration by granulocytes	4,20E-05		0,053	BLM, C2, C3, CCL19, CFB, CXCR5, FAS, HMGB1, LBP, MAP3K8, NT5E, PF4, PLP1, PRKCA, SELE, SFRP1, TNFRSF1B	17
Cellular Movement	Migration of tumor cells	4,20E-05		-0,653	BIRC7, CCL19, CDH2, CEACAM1, CXCR5, EPHB2, HMGB1, MIF, PDGFD, PRKCA, SELE, SFRP1, SLPI, TGFBR1, TIAM1, TNK2, VEGFD	17
Cell Cycle	S phase	3,67E-04		-1,277	APP, BCL2L1, BLM, CDKN2C, CDKN2D, CHEK1, HIRA, IL2, ITGA6, MAP3K8, MAPK8, MXD3, NPM1, NRG1, SDC3, SSH2, SUN2	17
Cell Death and Survival	Cytolysis	3,93E-04		0,061	ABCB1, APP, BCL2L1, C3, CD247, CEACAM1, CFB, FAS, GNLY, HCST, HNF4A, IL2, KLF1, LBP, PF4, PTMA, TNFRSF1B	17
Cell-To-Cell Signaling and Interaction, Nervous System Development and Function	Potentiation of synapse	4,97E-04		-1,100	APP, C3, CD247, CDH2, CDK5R1, EPHB2, HMGB1, IGF2R, IL2, ITGA8, LRP8, NPY, NRG1, PINK1, PRKCA, RELN, RGS14	17
Cellular Assembly and Organization	Formation of plasma membrane	6,65E-04	Decreased	-3,275	ADGRB1, ADGRL1, ADNP, APP, CBLN2, CDH2, COL4A5, CUX2, EPHB2, GPM6A, ITGA6, LRRC4B, NRG1, NTRK1, PRKCA, SIX1, SUN2	17
Molecular Transport, Protein Synthesis, Protein Trafficking	Localization of protein	7,54E-04			ATP2C2, CALCR, CDH2, FAS, GCNT3, IL2, MAPK8, MIF, MYADM, NPM1, PTCH1, S100A10, SIX1, SLC26A4, SLC9A3R1, TNS4, WNK3	17
Cell Death and Survival	Apoptosis of breast cancer cell lines	1,76E-03		-0,564	BCL2L1, CEACAM1, CHEK1, ELF5, FAS, MAPK8, MIF, MYBBP1A, NRG1, PELP1, PI3, PINK1, PRKCA, SFRP1, TGFBR1, THOC1, TNS4	17
Cellular Development, Cellular Growth and Proliferation	Cell proliferation of colorectal cancer cell lines	1,76E-03		-0,229	APP, BCL2L1, CACYBP, CUL5, EIF3A, FAS, IGF2R, MAPK8, MIF, NRG1, SELE, SLC7A5, SOX4, TGFBR1, THOC1, TIAM1, TNS4	17
Cell-To-Cell Signaling and Interaction, Cellular Growth and Proliferation	Stimulation of cells	1,86E-03		0,430	APP, C3, CCL19, CDH2, FAS, FGD3, HMGB1, IL2, LTF, MIF, NPY, NRG1, PDGFD, PF4, REST, TNFRSF13C, TNFRSF1B	17
Cancer, Gastrointestinal Disease, Organismal Injury and Abnormalities	Colorectal carcinoma	2,01E-03			ABCB1, ACLY, BCL2L1, CACYBP, CEACAM1, FAS, GSTM1, HMGB1, IL2, ITGA6, LRP8, MAPK8IP1, MIF, NTRK1, OSBPL1A, PTMA, WDHD1	17
Cell Death and Survival	Cell death of neuroblastoma cell lines	2,02E-05		-0,318	ADNP, APP, ATP13A2, BCL2L1, CD247, CDKN2D, CREB3L2, FAS, HCST, MAPK8, MIF, NPY, NTRK1, PINK1, REST, TNFRSF1B	16
Cardiovascular System Development and Function, Cell-To-Cell Signaling and Interaction	Interaction of endothelial cells	3,04E-05		-1,230	APP, C3, CDH2, FAS, HMGB1, ITGA6, LEPR, MYADM, NPY, NT5E, PF4, PRKCA, S100A10, SELE, SLC7A5, TGFBR1	16
Cell Death and Survival	Necrosis of prostate cancer cell lines	4,94E-05		0,902	AGR2, BCL2A1, BCL2L1, CD247, CDK5R1, CHEK1, DEFB1, FAS, HCST, ITGA6, MAPK8, MAPK8IP1, PRKCA, SLPI, TNFRSF11B, TTPA	16
Cell Death and Survival	Cell death of myeloid cells	1,01E-04		-1,804	ABCB1, ACAT1, APP, BCL2A1, BCL2L1, FAS, HMGB1, LEPR, LTF, MAPK8, MIF, PF4, RAN, S100A8, SLPI, TNFRSF1B	16
Connective Tissue Disorders, Immunological Disease, Inflammatory Disease, Organismal Injury and Abnormalities, Skeletal and Muscular Disorders	Lupus erythematosus	1,06E-04			ABCB1, BCL2L1, C2, C3, CD247, CEACAM1, CEACAM8, FAS, HMGB1, IL2, LTF, MAP3K8, PRKCA, S100A8, SERPINB13, TBC1D10C	16
Digestive System Development and Function, Gastrointestinal Disease, Organ Morphology, Organismal Development, Organismal Injury and Abnormalities	Abnormal morphology of intestine	1,11E-04			ABCB1, AGR2, C3, CEACAM1, CXCR5, EPHB2, GCNT3, IL2, ITGA6, MAP3K8, MAPK8, PPARGC1A, SLC9A3R1, TFF3, TNFRSF1B, TRA	16
Cell Death and Survival	Killing of cells	1,11E-04	Increased	2,687	APP, BCL2L1, BIRC7, CCL28, CD247, CHEK1, DEFB1, FAS, GNLY, IL2, LTF, PHC1, PI3, PRKCA, SLPI, TRA	16
Cell-To-Cell Signaling and Interaction, Cellular Assembly and Organization, Cellular Development, Cellular Function and Maintenance, Cellular Growth and Proliferation, Nervous System Development and Function, Tissue Development	Developmental process of synapse	1,42E-04	Decreased	-3,130	ADGRB1, ADGRL1, ADNP, APP, CBLN2, CDH2, COL4A5, CUX2, EPHB2, GPM6A, LRRC4B, NRG1, NTRK1, PRKCA, SIX1, SUN2	16
Cell Death and Survival, Neurological Disease, Organismal Injury and Abnormalities	Cell death of cerebral cortex cells	2,39E-04		-1,190	ADNP, APP, ATP13A2, BCL2L1, CDK5R1, CDKN2D, FAS, HMGB1, MIF, NPM1, NTRK1, PPARGC1A, REST, RPS3, SEMA3A, WNK3	16
Cellular Function and Maintenance	Internalization of cells	3,00E-04		1,309	ADGRB1, APP, C3, CEACAM1, CLIP1, FAS, FGD4, HMGB1, IL2, LEPR, MIF, NPM1, PF4, PRKCA, SAA1, SNAP23	16
Cellular Movement	Cell movement of neurons	8,25E-04		0,706	CDK5R1, CDKN2C, CUL5, EPHB2, GPM6A, HMGB1, ITGA6, LRP8, MAPK8, NRG1, RELN, ROBO2, SDC3, SEMA3A, SPOCK1, TIAM1	16
Cellular Development	Maturation of blood cells	8,80E-04		0,878	APP, BCL2L1, CCL19, CD247, FAS, HMGB1, IL2, KLF1, LCP1, MITF, NPY5R, PHC1, PTMA, TGFBR1, TNFRSF13C, TNFRSF1B	16
Cell-To-Cell Signaling and Interaction, Nervous System Development and Function	Long-term potentiation	1,28E-03		-1,428	APP, C3, CD247, CDH2, CDK5R1, EPHB2, HMGB1, IGF2R, IL2, ITGA8, LRP8, NPY, NRG1, PINK1, RELN, RGS14	16
Cellular Movement, Hematological System Development and Function, Immune Cell Trafficking, Inflammatory Response	Infiltration by neutrophils	2,62E-05		0,056	BLM, C2, C3, CFB, FAS, HMGB1, LBP, MAP3K8, NT5E, PF4, PLP1, PRKCA, SELE, SFRP1, TNFRSF1B	15
DNA Replication, Recombination, and Repair	Degradation of DNA	3,80E-05		-0,473	ABCB1, APP, BCL2L1, BIRC7, FAS, HNRNPA1, IL2, MAP1LC3A, MAPK8, NPM1, NRG1, TFF3, THOC1, TIAM1, XRN2	15
Cell Death and Survival	Apoptosis of phagocytes	5,43E-05		-1,361	APP, BCL2A1, BCL2L1, CCL19, FAS, HMGB1, HSP90AB1, IL2, LEPR, LTF, MIF, PF4, S100A8, SLPI, TNFRSF1B	15
Organismal Functions	Energy homeostasis	6,93E-05		-0,234	AGRP, ANGPTL6, APP, BCAT2, C3, CEACAM1, FTO, GPAT4, GPD2, LEPR, LPIN2, MAPK8, NPY, PPARGC1A, SDC3	15
Cardiovascular System Development and Function, Cell-To-Cell Signaling and Interaction	Binding of endothelial cells	8,00E-05		-1,464	APP, C3, CDH2, FAS, HMGB1, ITGA6, LEPR, MYADM, NPY, NT5E, PF4, PRKCA, S100A10, SELE, SLC7A5	15
Nervous System Development and Function, Organ Morphology, Organismal Development	Morphology of cerebral cortex	6,06E-04			APP, C3, CDK5R1, CUX2, FTO, IL2, ITGA6, LHX2, LRP8, MARCKSL1, PINK1, PPARGC1A, RELN, SEMA3A, SLC2A8	15
Cardiovascular System Development and Function	Vascularization	8,61E-04		-0,484	ADGRB1, C3, CEACAM1, CFB, EPHB2, HIRA, IL2, LTF, MAPK8, NDP, NPY, PDGFD, S100A10, SEMA3A, SFRP1	15
Cell Death and Survival, Nervous System Development and Function	Cell viability of neurons	1,05E-03		-0,629	ADNP, APP, BCL2L1, CDK5R1, CHEK1, EFNA3, HMGB1, IL2, MXD3, NRG1, NTRK1, PINK1, PLP1, PRKCA, PTCH1	15
Cellular Movement, Nervous System Development and Function	Migration of neurons	1,50E-03		0,391	CDK5R1, CDKN2C, CUL5, EPHB2, GPM6A, HMGB1, ITGA6, LRP8, MAPK8, NRG1, RELN, SDC3, SEMA3A, SPOCK1, TIAM1	15
Cancer, Endocrine System Disorders, Organismal Injury and Abnormalities	Thyroid gland tumor	1,86E-03			BCL2L1, CDKN2C, COCH, FCGBP, HSP90AB1, IL2, MAP3K8, MAPKAP1, NRG1, NTRK1, PTCH1, PTPRE, TFF3, TGFBR1, THOC1	15
Cellular Movement	Cell movement of tumor cells	1,57E-04		0,000	CCL19, CDH2, CEACAM1, HMGB1, MIF, PDGFD, PRKCA, SELE, SFRP1, SLPI, TGFBR1, TIAM1, TNK2, VEGFD	14
Cellular Movement, Hematological System Development and Function, Immune Cell Trafficking, Inflammatory Response	Chemotaxis of granulocytes	2,57E-04	Increased	2,023	APP, C3, CAMK1D, CCL19, CCL28, DEFB1, HMGB1, IL2, LBP, PF4, PRKCA, S100A8, SELE, SLPI	14
Digestive System Development and Function	Ingestion by mice	2,93E-04		-1,808	AGRP, ASL, BCAT2, FTO, LEPR, MAPK8, NPPC, NPY, NPY5R, PPARGC1A, SDC3, SEMA3A, TNFRSF1B, VEGFD	14
Cell-To-Cell Signaling and Interaction, Hematological System Development and Function, Inflammatory Response	Binding of professional phagocytic cells	3,93E-04		1,677	ADGRB1, APP, C3, HMGB1, ITGA6, LBP, LCP1, MIF, MITF, NPY, PF4, S100A8, SELE, TGFBR1	14
Connective Tissue Development and Function, Tissue Morphology	Mass of adipose tissue	4,62E-04			AGR2, AGRP, BCAT2, C3, CEACAM1, FSTL3, FTO, GPD2, LEPR, MAPK8, NPY, NPY5R, PPARGC1A, RDH16	14
Amino Acid Metabolism, Post-Translational Modification, Small Molecule Biochemistry	Phosphorylation of L-amino acid	5,00E-04		-1,775	ADNP, CDK5R1, CHEK1, EPHB2, LRP8, MAPK8, MIF, NRG1, NTRK1, PDGFD, PRKCA, RELN, TGFBR1, TNK2	14
Cell-To-Cell Signaling and Interaction	Binding of myeloid cells	7,34E-04		1,112	ADGRB1, APP, C3, HMGB1, ITGA6, LBP, LCP1, LTF, MIF, MITF, PF4, S100A8, SELE, TGFBR1	14
Cell-To-Cell Signaling and Interaction, Hematological System Development and Function	Interaction of mononuclear leukocytes	8,20E-04		1,052	CCL19, CCL28, FAS, HMGB1, IL2, LBP, LCP1, MIF, MYADM, NPY, NT5E, SAA1, SELE, STAP2	14
Cellular Development, Hematological System Development and Function, Lymphoid Tissue Structure and Development	Maturation of leukocytes	1,44E-03		0,685	APP, CCL19, CD247, FAS, HMGB1, IL2, LCP1, MITF, NPY5R, PHC1, PTMA, TGFBR1, TNFRSF13C, TNFRSF1B	14
Cellular Development, Cellular Growth and Proliferation	Expansion of blood cells	1,70E-03		0,819	ABCB1, BCL2L1, C3, CDKN2C, FAS, HMGB1, IL2, LCP1, LEPR, MAPK8, PLP1, TGFBR1, TNFRSF13C, TNFRSF1B	14
Cell Death and Survival, Organismal Injury and Abnormalities	Apoptosis of epithelial cell lines	1,75E-03		0,800	APP, BCL2A1, BCL2L1, CALCR, FAS, MAP3K8, MAPK8, MIF, NTRK1, PTCH1, SFRP1, TGFBR1, TIAM1, TNFRSF11B	14
Cell Death and Survival	Cell death of sarcoma cell lines	2,06E-03		0,024	ATAD2, BCL2A1, BCL2L1, CD247, CHEK1, FAS, HCST, MAPK8, MIF, NTRK1, PRKCA, SFRP1, THOC1, TNFRSF1B	14
Organismal Functions	Energy expenditure	2,39E-05		0,936	AGRP, ANGPTL6, APP, BCAT2, C3, CEACAM1, FTO, GPAT4, LEPR, LPIN2, MAPK8, NPY, SDC3	13
Cell Death and Survival, DNA Replication, Recombination, and Repair	Fragmentation of DNA	1,21E-04		-0,771	ABCB1, APP, BCL2L1, BIRC7, FAS, IL2, MAP1LC3A, MAPK8, NPM1, NRG1, TFF3, THOC1, TIAM1	13
Auditory and Vestibular System Development and Function, Nervous System Development and Function	Hearing	1,28E-04			ATP6V0A4, ATP6V1B1, CDKN2D, COCH, COL11A1, KCNQ1, MIF, NDP, SIX1, SLC26A4, SLC9A3R1, TSPEAR, USP53	13
Cell Death and Survival	Cell death of antigen presenting cells	1,49E-04		-1,509	ACAT1, APP, BCL2L1, CCL19, FAS, HMGB1, HSP90AB1, IL2, MAPK8, MIF, PF4, RAN, TNFRSF1B	13
Cardiovascular System Development and Function	Neovascularization	1,65E-04		-0,718	ADGRB1, C3, CFB, HIRA, IL2, LTF, MAPK8, NDP, NPY, PDGFD, S100A10, SEMA3A, SFRP1	13
Cell Morphology, Cellular Assembly and Organization, Cellular Function and Maintenance	Formation of filopodia	1,73E-04		0,913	ARPC3, CRIP1, FGD3, FGD4, GPM6A, ITGA6, PLEKHG4, RELN, SDC3, SRGAP2, TGFBR1, TNK2, VEGFD	13
Nervous System Development and Function, Organ Morphology, Organismal Development	Size of brain	2,32E-04			APP, CDK5R1, CUX2, FTO, GSC, IGF2R, KIF5C, LRP8, MARCKSL1, PPARGC1A, PTCH1, SEMA3A, TNFRSF1B	13
Cellular Development, Cellular Growth and Proliferation, Hematological System Development and Function, Lymphoid Tissue Structure and Development	Expansion of lymphocytes	2,93E-04		0,614	BCL2L1, C3, CDKN2C, FAS, HMGB1, IL2, LCP1, LEPR, MAPK8, PLP1, TGFBR1, TNFRSF13C, TNFRSF1B	13
Connective Tissue Disorders, Inflammatory Disease, Inflammatory Response, Organismal Injury and Abnormalities, Skeletal and Muscular Disorders	Polyarthritis	3,07E-04		0,537	COCH, FAS, GNLY, HMGB1, HNRNPA1, IL2, PHC1, PTMA, PTPRE, S100A10, S100A8, SELE, TNFRSF1B	13
Cancer, Gastrointestinal Disease, Organismal Injury and Abnormalities	Colon carcinoma	5,42E-04			ABCB1, ACLY, BCL2L1, CACYBP, FAS, GSTM1, HMGB1, IL2, ITGA6, LRP8, MIF, NTRK1, PTMA	13
Cell-To-Cell Signaling and Interaction, Inflammatory Response	Immune response of antigen presenting cells	9,51E-04		0,688	APP, C3, CCL19, FAS, HMGB1, IL2, LEPR, MAP3K8, MIF, NPM1, PRKCA, SAA1, TNFRSF11B	13
Cell-To-Cell Signaling and Interaction, Hematological System Development and Function	Binding of mononuclear leukocytes	1,15E-03		0,817	CCL19, CCL28, FAS, HMGB1, IL2, LBP, LCP1, MIF, MYADM, NPY, NT5E, SELE, STAP2	13
Endocrine System Development and Function, Molecular Transport, Protein Synthesis, Small Molecule Biochemistry	Quantity of insulin in blood	1,15E-03		0,042	AHSG, ANGPTL6, BCAT2, C3, CEACAM1, FFAR2, FSTL3, GPD2, LEPR, PCSK2, PPARGC1A, SDC3, SLC2A8	13
Connective Tissue Disorders, Immunological Disease, Inflammatory Disease, Organismal Injury and Abnormalities, Skeletal and Muscular Disorders	Systemic lupus erythematosus	1,59E-03			ABCB1, BCL2L1, C2, CD247, CEACAM1, CEACAM8, FAS, HMGB1, IL2, LTF, MAP3K8, PRKCA, TBC1D10C	13
Lipid Metabolism, Molecular Transport, Small Molecule Biochemistry	Release of lipid	1,83E-03		-1,146	ABCB1, APP, C3, FAS, HMGB1, MIF, NPY, NRG1, PPARGC1A, PRKCA, S100A10, SAA1, SMPD2	13
Cell Death and Survival	Cell death of neuroglia	1,45E-05		1,072	APP, BCL2L1, FAS, HSP90AB1, IL2, LHX2, NRG1, NTRK1, PLP1, PRKCA, SDC3, SMPD2	12
Endocrine System Disorders, Organismal Injury and Abnormalities	Benign thyroid disease	6,54E-05		-0,816	AHSG, APP, CDKN2C, FAS, HSP90AB1, IGSF1, IL2, LEPR, NTRK1, PHC1, SLC26A4, TPR	12
Cellular Movement	Cell movement of cancer cells	1,75E-04		-0,302	CCL19, CDH2, CEACAM1, HMGB1, MIF, PRKCA, SELE, SFRP1, TGFBR1, TIAM1, TNK2, VEGFD	12
Lipid Metabolism, Molecular Transport, Small Molecule Biochemistry	Transport of steroid	3,59E-04		-1,395	ABCB1, ACAT1, ACSL1, ANXA6, APP, OSBPL1A, PTCH1, RELN, S100A8, SAA1, SLC9A3R1, SLCO1A2	12
Cellular Movement, Hematological System Development and Function, Immune Cell Trafficking, Inflammatory Response	Chemotaxis of neutrophils	5,99E-04		1,603	APP, C3, CAMK1D, CCL19, DEFB1, HMGB1, LBP, PF4, PRKCA, S100A8, SELE, SLPI	12
Energy Production	Consumption of oxygen	8,49E-04		-1,317	ACSL1, AGRP, ANGPTL6, APP, C3, CEACAM1, FTO, GPD2, LDHA, LEPR, NPPC, PPARGC1A	12
Cellular Movement, Hematological System Development and Function, Immune Cell Trafficking	Migration of antigen presenting cells	8,49E-04		1,645	APP, C3, CCL19, CEACAM1, DEFB1, HMGB1, MIF, NPM1, NPY, S100A10, SELE, STAP2	12
Nutritional Disease, Psychological Disorders	Eating Disorders	9,62E-04		-0,552	AGRP, C3, CA1, CA5B, CEACAM1, FTO, HMGB1, LEPR, MAOB, MAPK8, NPY, SDC3	12
Cell Morphology, Cellular Assembly and Organization, Cellular Function and Maintenance, Nervous System Development and Function	Extension of neurites	1,13E-03		0,334	ADNP, APP, CCL19, CDH2, CDK5R1, EFNA3, HMGB1, LHX2, LTF, RELN, SEMA3A, TIAM1	12
Hematological System Development and Function, Tissue Development	Accumulation of myeloid cells	1,33E-03		1,296	AGRP, BCL2A1, C3, FAS, HMGB1, ITGA6, MAP3K8, MIF, NT5E, S100A8, SLPI, TNFRSF1B	12
Amino Acid Metabolism	Quantity of amino acids	1,33E-03		-0,784	AGRP, APP, ASL, BCAT2, BCL2L1, DDAH1, GPD2, IGSF1, MAPK8, MAT1A, NPY, SLCO1A2	12
Cellular Movement, Hematological System Development and Function, Immune Cell Trafficking	Cellular infiltration by mononuclear leukocytes	1,74E-03		0,748	APP, C3, CCL19, FAS, IL2, MAT1A, MIF, PF4, SAA1, SELE, SFTPC, TGFBR1	12
Cellular Movement	Migration of myeloid cells	1,74E-03		0,201	APP, C3, CCL19, CEACAM1, FAS, HMGB1, ITGA6, LTF, S100A8, SAA1, SELE, SLPI	12
Cell-To-Cell Signaling and Interaction, Cellular Movement, Hematological System Development and Function, Immune Cell Trafficking, Inflammatory Response	Recruitment of neutrophils	1,94E-03		-1,112	CCL19, COCH, HMGB1, IL37, LTF, MAP3K8, MIF, S100A8, SELE, SFRP1, SLPI, TRA	12
Cell Death and Survival	Apoptosis of myeloid cells	2,01E-03		-1,723	APP, BCL2A1, BCL2L1, FAS, HMGB1, LEPR, LTF, MIF, PF4, S100A8, SLPI, TNFRSF1B	12
Cell-To-Cell Signaling and Interaction, Hematological System Development and Function, Immune Cell Trafficking, Inflammatory Response	Activation of granulocytes	3,86E-05		1,274	C3, HMGB1, IL2, LTF, MIF, NPY, PF4, SAA1, SELE, SFRP1, SLPI	11
Lipid Metabolism, Molecular Transport, Small Molecule Biochemistry	Transport of sterol	3,13E-04		-1,057	ABCB1, ACAT1, ACSL1, ANXA6, APP, OSBPL1A, PTCH1, RELN, S100A8, SAA1, SLC9A3R1	11
Embryonic Development, Organ Development, Organismal Development, Reproductive System Development and Function, Tissue Development	Formation of testis	3,49E-04			AHSG, BCL2L1, BLM, COL9A3, EIF2S2, FSTL3, NTRK1, SFRP1, TCF21, TGFBR1, WNT2B	11
Cancer, Organismal Injury and Abnormalities	Intraepithelial neoplasia	3,68E-04			C3, CDH2, CFB, ITGA6, LTF, PELP1, S100A8, SOX4, TFF3, TMC8, WFDC2	11
Dermatological Diseases and Conditions, Developmental Disorder, Hereditary Disorder, Metabolic Disease, Organismal Injury and Abnormalities	Premature aging	3,88E-04			ANGPTL6, ATP6V0A2, COCH, COL4A5, EYA2, LRP8, PTPRE, RAE1, RELN, SOX4, TNFRSF11B	11
Connective Tissue Development and Function, Organismal Development, Skeletal and Muscular System Development and Function, Tissue Development	Morphology of cranium	5,02E-04			EPHB2, GSC, HOXB3, KCNQ1, NPPC, PHC1, PHC2, SIX1, SLC26A4, SOX4, TNFRSF11B	11
Cellular Movement, Hematological System Development and Function, Immune Cell Trafficking	Migration of granulocytes	6,75E-04		0,711	C3, CCL19, CEACAM1, FAS, HMGB1, ITGA6, LTF, S100A8, SAA1, SELE, SLPI	11
Connective Tissue Disorders, Inflammatory Disease, Inflammatory Response, Organismal Injury and Abnormalities, Skeletal and Muscular Disorders	Experimentally-induced arthritis	9,35E-04		1,209	C3, CFB, FAS, HMGB1, IL2, MAPK8, MIF, PHC1, PTMA, SELE, TNFRSF1B	11
Cell-To-Cell Signaling and Interaction, Cellular Function and Maintenance, Inflammatory Response	Phagocytosis of phagocytes	1,22E-03		0,865	APP, C3, FAS, HMGB1, IL2, LEPR, MIF, NPM1, PF4, PRKCA, SAA1	11
Cellular Movement, Hematological System Development and Function, Immune Cell Trafficking, Lymphoid Tissue Structure and Development	Homing of lymphocytes	1,27E-03	Increased	2,569	CCL19, CCL28, CXCR5, DEFB1, GNLY, IL2, LCP1, MIF, PF4, SAA1, TIAM1	11
Cell-To-Cell Signaling and Interaction, Cellular Function and Maintenance, Hematological System Development and Function	Phagocytosis of myeloid cells	1,33E-03		0,719	APP, C3, FAS, HMGB1, IL2, LEPR, MIF, NPM1, PF4, PRKCA, SAA1	11
Cell-To-Cell Signaling and Interaction	Adhesion of myeloid cells	1,51E-03		-0,064	APP, C3, HMGB1, LCP1, LTF, MIF, MITF, PF4, S100A8, SELE, TGFBR1	11
Cell Morphology, Cellular Function and Maintenance	Autophagy of tumor cell lines	1,93E-03		-0,177	APP, BCL2L1, CDKN2D, CHEK1, CIP2A, FAS, KIF5C, MAP1LC3A, MAPK8, MITF, PINK1	11
Cell-To-Cell Signaling and Interaction, Hematological System Development and Function, Immune Cell Trafficking, Inflammatory Response	Activation of neutrophils	1,84E-05		1,136	C3, HMGB1, IL2, LTF, MIF, PF4, SAA1, SELE, SFRP1, SLPI	10
Inflammatory Response	Cytotoxic reaction of cells	7,64E-05		-1,964	ABCB1, APP, BCL2L1, CD247, CDK5R1, COCH, FAS, IL2, TTC3, TTPA	10
Nutritional Disease, Psychological Disorders	Hyperphagia	1,67E-04		0,119	AGRP, C3, CA1, CA5B, CEACAM1, FTO, LEPR, MAPK8, NPY, SDC3	10
Cellular Movement	Cell movement of central nervous system cells	3,35E-04		0,164	APP, CDK5R1, CUL5, EPHB2, NPM1, RELN, ROBO2, SDC3, SEMA3A, TIAM1	10
Organismal Injury and Abnormalities	Ulcer	7,34E-04			ABCB1, COL11A1, COL4A5, COL9A3, HMGB1, IL2, NTRK1, SELE, SERPINB13, TRA	10
Cellular Movement, Hematological System Development and Function, Immune Cell Trafficking, Inflammatory Response, Lymphoid Tissue Structure and Development	Chemotaxis of lymphocytes	8,15E-04	Increased	2,378	CCL19, CCL28, DEFB1, GNLY, IL2, LCP1, MIF, PF4, SAA1, TIAM1	10
Cell-To-Cell Signaling and Interaction, Nervous System Development and Function	Long-term potentiation of brain	9,02E-04		-0,995	APP, CD247, CDH2, EPHB2, HMGB1, IGF2R, LRP8, NRG1, PINK1, RELN	10
Cell-To-Cell Signaling and Interaction, Cellular Function and Maintenance, Hematological System Development and Function, Inflammatory Response	Phagocytosis by macrophages	9,02E-04		0,316	APP, C3, FAS, HMGB1, IL2, LEPR, MIF, NPM1, PRKCA, SAA1	10
Connective Tissue Development and Function, Connective Tissue Disorders, Organismal Development, Organismal Injury and Abnormalities, Skeletal and Muscular Disorders, Skeletal and Muscular System Development and Function, Tissue Development	Abnormal morphology of cranium	1,21E-03			EPHB2, GSC, HOXB3, KCNQ1, PHC1, PHC2, SIX1, SLC26A4, SOX4, TNFRSF11B	10
Cell Death and Survival	Cell viability of connective tissue cells	1,27E-03		0,555	APP, BLM, CALCR, COCH, FAS, LEPR, LTF, MAPK8, MIF, NTRK1	10
Cell Death and Survival	Apoptosis of antigen presenting cells	1,33E-03		-0,667	APP, BCL2L1, CCL19, FAS, HMGB1, HSP90AB1, IL2, MIF, PF4, TNFRSF1B	10
Cardiovascular System Development and Function, Organismal Development	Vascularization of absolute anatomical region	1,33E-03		-0,761	ADGRB1, C3, CFB, HIRA, MAPK8, NDP, NPY, PDGFD, SEMA3A, SFRP1	10
Cell Death and Survival	Apoptosis of neuroglia	1,29E-04		1,400	APP, BCL2L1, FAS, IL2, LHX2, NRG1, NTRK1, PLP1, PRKCA	9
Tissue Morphology	Degradation of connective tissue	2,73E-04		0,649	ADAMTS5, CFB, FGF18, HMGB1, PHC1, PTPRE, SLPI, TNFRSF11B, TNFRSF1B	9
Organismal Injury and Abnormalities, Renal and Urological Disease	Nephrosis	3,13E-04			CA1, CA5B, CMIP, GPC5, GSTM1, ITGA6, PDE11A, PDLIM1, TTC21B	9
Nutritional Disease	Body mass index	3,35E-04			AGRP, FTO, GPD2, LEPR, MARCKSL1, NPY, PPARGC1A, SDC3, TNFRSF1B	9
Cellular Movement	Cell movement of neuroglia	4,09E-04		-0,243	APP, EFNA3, HMGB1, ITGA6, MAPK8, NPM1, NRG1, SEMA3A, TIAM1	9
Connective Tissue Disorders, Organismal Injury and Abnormalities, Tissue Morphology	Degeneration of connective tissue	4,37E-04		0,047	ADAMTS5, APP, CFB, FGF18, HMGB1, NDP, PHC1, SLC26A4, TNFRSF11B	9
Cellular Movement, Reproductive System Development and Function	Cell movement of breast cell lines	4,66E-04		-0,271	APP, EYA2, LRP8, MARCKSL1, PRKCA, RELN, RNF20, TGFBR1, TNS4	9
Cardiovascular System Development and Function, Organismal Development, Visual System Development and Function	Neovascularization of eye	5,29E-04		-0,388	ADGRB1, C3, CFB, HIRA, MAPK8, NDP, PDGFD, SEMA3A, SFRP1	9
Cell Cycle, Gene Expression	Binding of NFkB binding site	5,63E-04		-0,448	APP, FAS, HMGB1, LTF, MIF, NRG1, SLPI, TFF3, TNFRSF1B	9
Cellular Movement	Cell movement of brain cells	5,63E-04		0,164	APP, CDK5R1, CUL5, EPHB2, RELN, ROBO2, SDC3, SEMA3A, TIAM1	9
Lipid Metabolism, Molecular Transport, Small Molecule Biochemistry	Export of cholesterol	9,55E-04		-0,302	ABCB1, ACAT1, ACSL1, ANXA6, APP, PTCH1, RELN, S100A8, SAA1	9
Cell-To-Cell Signaling and Interaction, Nervous System Development and Function	Long-term potentiation of hippocampus	1,01E-03		-0,762	APP, CD247, CDH2, EPHB2, HMGB1, IGF2R, LRP8, NRG1, RELN	9
Cell-To-Cell Signaling and Interaction, Hematological System Development and Function, Immune Cell Trafficking, Inflammatory Response	Activation of dendritic cells	1,07E-03		-0,294	C3, FAS, GNLY, HMGB1, IL2, IL37, PRKCA, SLPI, TNFRSF1B	9
Cell Death and Survival	Cell death of pheochromocytoma cell lines	1,13E-03		-0,691	ADNP, APP, BCL2L1, FAS, MAPK8, NPM1, NTRK1, REST, RPS3	9
Cell Death and Survival, Hematological System Development and Function	Cell viability of T lymphocytes	1,13E-03		0,348	BCL2L1, BLM, C3, FAS, GIMAP1, HMGB1, IL2, TNFRSF1B, TRA	9
Cancer, Cell Death and Survival, Organismal Injury and Abnormalities, Tumor Morphology	Cell viability of tumor cells	1,32E-03		-0,113	ACLY, APP, FAS, FGF18, HMGB1, MITF, SFRP1, TNFRSF11B, TNFRSF13C	9
Free Radical Scavenging	Production of superoxide	1,63E-03		-1,050	APP, FAS, FFAR2, LTF, MAPK8, PINK1, PRKCA, PRSS23, SLC9A3R1	9
Hematological System Development and Function, Lymphoid Tissue Structure and Development, Tissue Morphology	Quantity of regulatory T lymphocytes	1,89E-03		0,817	CCL19, IL2, LEPR, MIF, SAA1, SELE, TGFBR1, TNFRSF11B, TNFRSF1B	9
Cancer, Organismal Injury and Abnormalities	Glandular intraepithelial neoplasm	1,98E-03			C3, CDH2, CFB, ITGA6, LTF, S100A8, SOX4, TFF3, WFDC2	9
Cell-To-Cell Signaling and Interaction, Cellular Movement, Hematological System Development and Function, Immune Cell Trafficking	Recruitment of antigen presenting cells	1,98E-03		-0,564	APP, CCL19, COCH, HMGB1, IL2, IL37, MAP3K8, MAPK8, STAP2	9
Cellular Movement	Scattering of cells	1,66E-04		-0,075	CDK5R1, EPHB2, ITGA6, NRG1, RELN, TFF3, TIAM1, TPR	8
Cell Death and Survival	Cell death of dendritic cells	2,34E-04		-0,343	APP, BCL2L1, CCL19, FAS, HSP90AB1, IL2, PF4, TNFRSF1B	8
Molecular Transport	Nuclear export	5,09E-04			HNRNPA1, HNRNPA2B1, NPM1, NUP155, RAE1, RAN, THOC1, TPR	8
Cellular Movement	Invasion of colorectal cancer cell lines	6,75E-04		1,394	BCL2L1, MIF, NRG1, PDLIM1, S100A10, TFF3, TIAM1, TNS4	8
Cell Death and Survival	Cell death of lymphoblastoid cell lines	1,00E-03		0,130	BLM, CDKN2C, CHEK1, FAS, GPM6A, NPM1, NT5E, TRA	8
Cellular Growth and Proliferation, Organismal Development	Growth of yeast	1,00E-03		-0,216	ABCB1, BCL2A1, BLM, HSP90AB1, IL2, LCP1, OSBPL1A, RANBP1	8
Connective Tissue Disorders, Organismal Injury and Abnormalities	Damage of connective tissue	1,36E-03		0,649	ADAMTS5, APP, CFB, FGF18, HMGB1, MAPK8, PHC1, TNFRSF11B	8
Lipid Metabolism, Small Molecule Biochemistry	Synthesis of glycosphingolipid	1,63E-03		0,010	ABCB1, APP, BCL2L1, FAS, GNLY, LEPR, SMPD2, SPTSSB	8
Cellular Movement, Hematological System Development and Function, Humoral Immune Response, Immune Cell Trafficking	Cell movement of B lymphocytes	1,82E-03	Increased	2,221	APP, CCL19, CCL28, CXCR5, IL2, LCP1, MIF, TNFRSF1B	8
Tissue Development	Formation of epithelial tissue	2,03E-03		-1,532	CEACAM1, COL4A5, HIRA, NDP, PF4, PRKCA, SELE, SLPI	8
Cell Death and Survival	Cell death of oligodendrocytes	1,12E-04		0,377	APP, BCL2L1, HSP90AB1, IL2, NTRK1, PLP1, SMPD2	7
Cell Death and Survival	Apoptosis of dendritic cells	4,19E-04		-0,342	APP, BCL2L1, CCL19, FAS, HSP90AB1, IL2, PF4	7
Cellular Assembly and Organization, Cellular Function and Maintenance	Organization of mitotic spindle	5,43E-04			CHD3, RAE1, RAN, RANBP1, RGS14, SSRP1, SUN2	7
Lipid Metabolism, Small Molecule Biochemistry	Synthesis of ceramide	7,54E-04		0,212	APP, BCL2L1, FAS, GNLY, LEPR, SMPD2, SPTSSB	7
Molecular Transport, RNA Trafficking	Transport of RNA	7,54E-04			HNRNPA2B1, KIF5C, NUP155, RAE1, RAN, THOC1, TPR	7
Cellular Movement, Reproductive System Development and Function	Migration of breast cell lines	1,10E-03		0,126	APP, EYA2, LRP8, MARCKSL1, RELN, RNF20, TNS4	7
Cellular Movement, Nervous System Development and Function	Migration of neuroglia	1,10E-03		0,130	APP, EFNA3, HMGB1, MAPK8, NRG1, SEMA3A, TIAM1	7
Connective Tissue Disorders, Developmental Disorder, Organismal Injury and Abnormalities, Skeletal and Muscular Disorders	High bone mass disease	1,27E-03			CALCR, HCST, HNRNPA1, HNRNPA2B1, LEMD3, MITF, TNFRSF11B	7
Organismal Functions	Percentage body fat	1,27E-03		-0,128	BCAT2, GPM6A, MAPK8, NPPC, PPARGC1A, RDH16, SDC3	7
Cell-To-Cell Signaling and Interaction, Nervous System Development and Function	Auditory evoked potential	1,46E-03		0,168	COCH, KCNQ1, MIF, NDP, SLC26A4, TNFRSF11B, USP53	7
Carbohydrate Metabolism, Small Molecule Biochemistry	Synthesis of glycosaminoglycan	1,68E-03		-0,452	ADCY2, LTF, NPPC, NRG1, PF4, SFRP1, TGFBR1	7
Lipid Metabolism, Molecular Transport, Small Molecule Biochemistry	Accumulation of steroid	1,91E-03		0,116	ACAT1, APP, IGF2R, LEPR, NRG1, SAA1, SLC2A8	7
Cell Death and Survival	Cell death of nervous tissue cell lines	1,91E-03		0,600	APP, BCL2L1, FAS, MAPK8, NPM1, SMPD2, TNFRSF1B	7
Cellular Assembly and Organization	Accumulation of filaments	7,37E-06		-0,054	ACAT1, APP, CDK5R1, HMGB1, PPARGC1A, RELN	6
Lipid Metabolism, Small Molecule Biochemistry	Activation of lipid	1,07E-04		-0,827	ACSL1, CLIP1, HMGB1, MAPK8, MIF, SLPI	6
Embryonic Development, Organismal Development, Tissue Development	Formation of somites	2,75E-04			CDH2, EPN2, HIRA, PHC1, PHC2, SFRP1	6
Auditory Disease, Neurological Disease	Vestibular disorder	3,10E-04			COCH, EPHB2, KCNQ1, SIX1, SLC26A4, USP53	6
Organismal Injury and Abnormalities, Reproductive System Disease, Skeletal and Muscular Disorders	Pelvic organ prolapse	3,48E-04		-1,965	AGR2, BCL2L1, BLM, IL2, PI3, TRA	6
Respiratory System Development and Function	Development of upper respiratory tract	3,90E-04			GSC, LHX2, PCSK5, PTCH1, SIX1, TGFBR1	6
Cell-To-Cell Signaling and Interaction, Nervous System Development and Function	Long-term potentiation of hippocampal CA1 region	5,40E-04		0,064	APP, CDH2, HMGB1, LRP8, NRG1, RELN	6
Lipid Metabolism, Small Molecule Biochemistry	Esterification of lipid	5,99E-04		0,853	ABCB1, ACAT1, ACSL1, APP, C3, FAS	6
Cardiovascular Disease, Organismal Injury and Abnormalities	Formation of blood clot	8,06E-04			APP, C3, EPHB2, LRP8, PF4, TNFRSF1B	6
Neurological Disease	Memory deficits	9,72E-04		-0,059	APP, C3, EPHB2, HNRNPA2B1, NPY, VEGFD	6
Tissue Morphology	Loss of neurons in central nervous system	1,06E-03			APP, CDK5R1, IL37, MAOB, MAPK8IP1, MIF	6
Cellular Function and Maintenance, Cellular Movement	Localization of cells	1,16E-03	Increased	2,213	C3, CCL19, CDK5R1, SELE, TNFRSF11B, TNFRSF13C	6
Molecular Transport, RNA Trafficking	Export of RNA	1,27E-03			HNRNPA2B1, NUP155, RAE1, RAN, THOC1, TPR	6
Cell Death and Survival	Cell death of stomach cancer cell lines	1,38E-03		-0,882	BCL2L1, CD247, FAS, HCST, PRKCA, TFF3	6
Embryonic Development, Nervous System Development and Function, Organ Development, Organismal Development, Tissue Development	Formation of olfactory bulb	1,38E-03			CDK5R1, EFNA3, LHX2, LRP8, ROBO2, SEMA3A	6
Hereditary Disorder, Organismal Injury and Abnormalities, Renal and Urological Disease	Hereditary renal tubular disorder	1,77E-03			ATP6V0A4, ATP6V1B1, CA1, CA5B, HNF4A, SLC9A3R1	6
Cell-To-Cell Signaling and Interaction, Small Molecule Biochemistry	Metabolism of neurotransmitter	1,77E-03		-0,655	APP, GCHFR, MAOB, NPY, NTRK1, PNKD	6
Cellular Assembly and Organization, Neurological Disease	Accumulation of amyloid-beta plaques	3,46E-07		0,492	ACAT1, APP, CDK5R1, PPARGC1A, RELN	5
Inflammatory Response	Anti-tumor response	9,14E-05		1,109	CD247, FAS, GNLY, HCST, HMGB1	5
Cell Morphology, Cellular Function and Maintenance	Transmembrane potential of cells	9,14E-05		1,125	APP, BCL2L1, FAS, HNF4A, REST	5
Cell Death and Survival	Cell death of skin cancer cell lines	1,65E-04		0,555	CHEK1, FAS, HCST, HSP90AB1, S100A8	5
Cellular Assembly and Organization	Generation of filaments	2,78E-04		-0,562	ACAT1, APP, MYOT, SFRP1, SSRP1	5
Digestive System Development and Function, Gastrointestinal Disease, Organ Morphology, Organismal Development, Organismal Injury and Abnormalities, Tissue Morphology	Abnormal morphology of intestinal epithelium	3,26E-04			ABCB1, IL2, MAPK8, SLC9A3R1, TFF3	5
Cancer, Cell Death and Survival, Organismal Injury and Abnormalities, Tumor Morphology	Cell death of neuroblastoma cells	3,80E-04		-0,293	APP, BCL2L1, FAS, IL2, NTRK1	5
Cellular Assembly and Organization, Cellular Function and Maintenance	Release of granules	4,41E-04		0,937	CD247, CEACAM1, FAS, HCST, SNAP23	5
Digestive System Development and Function, Gastrointestinal Disease, Organ Morphology, Organismal Development, Organismal Injury and Abnormalities, Tissue Morphology	Abnormal morphology of intestinal mucosa	5,09E-04			ABCB1, AGR2, GCNT3, MAPK8, TRA	5
Cellular Movement, Nervous System Development and Function	Cell movement of Schwann cells	6,67E-04			EFNA3, ITGA6, MAPK8, NRG1, TIAM1	5
Cellular Movement, Hematological System Development and Function, Immune Cell Trafficking, Inflammatory Response	Cell movement of monocyte-derived dendritic cells	7,59E-04		0,658	CCL19, GNLY, HMGB1, NPY, PF4	5
Cell Death and Survival	Cell viability of pheochromocytoma cell lines	7,59E-04		0,462	ADNP, APP, BCL2L1, NTRK1, TNFRSF1B	5
Lipid Metabolism, Small Molecule Biochemistry	Esterification of cholesterol	8,60E-04		0,415	ABCB1, ACAT1, APP, C3, FAS	5
Gastrointestinal Disease, Hepatic System Disease, Inflammatory Disease, Organismal Injury and Abnormalities	Primary sclerosing cholangitis	9,71E-04			BCL2A1, BCL2L1, CCL28, PTCH1, WNT2B	5
Neurological Disease, Organismal Injury and Abnormalities	Damage of cerebral cortex	1,09E-03		0,128	APP, BCL2L1, LEPR, PPARGC1A, SEMA3A	5
Cellular Function and Maintenance	Respiration of mitochondria	1,09E-03		1,131	ACSL1, APP, BCL2L1, MAPK8, PPARGC1A	5
Cell Morphology, Cellular Function and Maintenance	Autophagy of mitochondria	1,22E-03			BCL2L1, MAP1LC3A, MITF, PINK1, USP30	5
Amino Acid Metabolism, Endocrine System Development and Function, Molecular Transport, Small Molecule Biochemistry	Quantity of L-triiodothyronine	1,22E-03		-0,133	AGRP, GPD2, IGSF1, MAPK8, NPY	5
Cell Death and Survival	Apoptosis of oligodendrocytes	1,37E-03		1,000	APP, BCL2L1, IL2, NTRK1, PLP1	5
Infectious Diseases	Dengue fever	1,52E-03			C3, FAS, IL2, PF4, TNFRSF1B	5
Cellular Movement, Hematological System Development and Function, Humoral Immune Response, Immune Cell Trafficking, Lymphoid Tissue Structure and Development	Homing of B lymphocytes	1,52E-03	Increased	2,190	CCL19, CCL28, CXCR5, IL2, MIF	5
Cell Death and Survival	Necrosis of brain cancer cell lines	1,69E-03		-0,975	APP, BCL2L1, NRG1, NTRK1, SEMA3A	5
Cell Death and Survival	Cytolysis of leukemia cell lines	1,72E-04		1,176	ABCB1, FAS, GNLY, IL2	4
Cell Death and Survival	Condensation of cells	2,91E-04			APP, BCL2L1, EMP1, NPPC	4
Cellular Compromise	Acidification of cells	3,68E-04			ABCB1, BCL2L1, FAS, SLC7A5	4
Neurological Disease, Organismal Injury and Abnormalities	Damage of hippocampus	3,68E-04		0,594	APP, BCL2L1, LEPR, PPARGC1A	4
Cell Death and Survival	Apoptosis of skin cancer cell lines	4,59E-04		0,152	FAS, HCST, HSP90AB1, S100A8	4
Digestive System Development and Function, Embryonic Development, Organ Development, Organismal Development, Respiratory System Development and Function, Tissue Development	Development of pharynx	4,59E-04			LHX2, PTCH1, SIX1, TGFBR1	4
Lipid Metabolism, Molecular Transport, Small Molecule Biochemistry	Accumulation of ceramide	5,65E-04		-0,520	APP, BCL2L1, FAS, SMPD2	4
Nervous System Development and Function	Maximal conduction velocity	5,65E-04	Increased	2,000	FGD4, PHYH, SEPT8, TRA	4
Lipid Metabolism, Molecular Transport, Small Molecule Biochemistry	Release of phospholipid	5,65E-04			ABCB1, APP, FAS, SAA1	4
Hereditary Disorder, Nutritional Disease, Organismal Injury and Abnormalities	Familial obesity	6,87E-04			AGRP, FTO, LEPR, SDC3	4
Cell Death and Survival	Apoptosis of monocytes	1,16E-03		-1,172	APP, FAS, PF4, S100A8	4
Cell Death and Survival, Embryonic Development	Apoptosis of mesenchymal cells	1,36E-03		0,152	BCL2L1, FAS, SIX1, SOX4	4
Cellular Movement	Cell movement of macrophage cancer cell lines	1,36E-03		1,188	C3, CLIP1, GNB2, HMGB1	4
Auditory Disease, Auditory and Vestibular System Development and Function, Connective Tissue Development and Function, Connective Tissue Disorders, Organ Morphology, Organismal Development, Organismal Injury and Abnormalities, Skeletal and Muscular Disorders, Skeletal and Muscular System Development and Function, Tissue Development	Abnormal morphology of semicircular canal	1,59E-03			EPHB2, KCNQ1, SIX1, SLC26A4	4
Auditory Disease, Auditory and Vestibular System Development and Function, Neurological Disease, Organ Morphology, Organismal Development, Organismal Injury and Abnormalities	Abnormal morphology of vestibule	1,59E-03			EPHB2, KCNQ1, SIX1, SLC26A4	4
Cellular Movement	Migration of sarcoma cells	1,59E-03		1,000	CCL19, HMGB1, MIF, VEGFD	4
Cell Death and Survival	Apoptosis of PBMCs	1,83E-03			FAS, GP2, MAPK8, S100A8	4
Cell Death and Survival	Apoptosis of osteoclasts	1,83E-03			BCL2L1, FAS, TGFBR1, TNFRSF11B	4
Cell Death and Survival	Killing of leukocyte cell lines	1,83E-03		1,982	BIRC7, CD247, FAS, IL2	4
Connective Tissue Development and Function, Skeletal and Muscular System Development and Function	Association of bone	7,64E-06			PHC1, PHC2, PTPRE	3
Embryonic Development, Organismal Development, Tissue Development	Development of tympanic ring	7,64E-06			GSC, PHC1, PHC2	3
Lipid Metabolism, Molecular Transport, Small Molecule Biochemistry	Release of glycosphingolipid	3,01E-05			ABCB1, APP, SMPD2	3
Cellular Assembly and Organization, Cellular Function and Maintenance	Release of cytotoxic granule	1,46E-04			CD247, FAS, HCST	3
Behavior	Animal rolling	2,52E-04			APP, KCNQ1, SELE	3
Cell Death and Survival	Apoptosis of memory T lymphocytes	2,52E-04			CCL19, FAS, IL2	3
Carbohydrate Metabolism, Lipid Metabolism, Molecular Transport, Small Molecule Biochemistry	Concentration of lipopolysaccharide	3,97E-04			C3, CFB, LBP	3
Cancer, Organismal Injury and Abnormalities, Tissue Morphology, Tumor Morphology	Size of tumor tissue	3,97E-04			CCL19, IL2, VEGFD	3
Organ Morphology, Organismal Injury and Abnormalities, Reproductive System Development and Function, Reproductive System Disease	Abnormal morphology of enlarged placenta	5,87E-04			CD247, HCST, IGF2R	3
Cardiovascular System Development and Function, Cell-To-Cell Signaling and Interaction, Nervous System Development and Function, Organ Development	Action potential of heart cells	5,87E-04			CALM1 (includes others), CDH2, KCNQ1	3
Cell Death and Survival, Embryonic Development	Apoptosis of mesenchymal stem cells	5,87E-04			BCL2L1, FAS, SOX4	3
Cellular Compromise, Connective Tissue Disorders, Organismal Injury and Abnormalities, Tissue Morphology	Degeneration of fibroblasts	5,87E-04			APP, NDP, SLC26A4	3
Nutritional Disease	Early-onset morbid obesity	5,87E-04			FTO, LEPR, PTER	3
Cell Death and Survival	Killing of Pseudomonas aeruginosa	5,87E-04			DEFB1, LTF, SLPI	3
Cancer, Organismal Injury and Abnormalities, Tumor Morphology	Transformation of tumor cells	5,87E-04			PTPRE, SFRP1, TFF3	3
Cell Death and Survival	Apoptosis of cytotoxic T cells	8,27E-04			FAS, IL2, TNFRSF1B	3
Connective Tissue Development and Function, Connective Tissue Disorders, Organ Morphology, Organismal Development, Organismal Injury and Abnormalities, Skeletal and Muscular Disorders, Skeletal and Muscular System Development and Function, Tissue Development	Abnormal morphology of exoccipital bone	1,12E-03			HOXB3, PHC1, PHC2	3
Cell Death and Survival, Organismal Injury and Abnormalities	Apoptosis of colonocytes	1,12E-03			CEACAM1, FAS, TFF3	3
Cell Death and Survival	Apoptosis of peripheral T lymphocyte	1,12E-03			FAS, GP2, MAPK8	3
Cellular Compromise, Skeletal and Muscular Disorders, Tissue Morphology	Disorganization of muscle cells	1,47E-03			ACSL1, MYOT, SIX1	3
Auditory and Vestibular System Development and Function, Organ Development	Growth of ear	1,47E-03			EPHB2, SIX1, SOX4	3
Cancer, Endocrine System Disorders, Organismal Injury and Abnormalities	Thyroid hyperplasia	1,47E-03			CDKN2C, NTRK1, TPR	3
Behavior	Bobbing of head	1,89E-03			EPHB2, KCNQ1, SLC26A4	3
Drug Metabolism	Catabolism of xenobiotic	1,89E-03			ACSL1, GSTM1, GSTM2	3
Neurological Disease, Organismal Injury and Abnormalities	Temporal lobe epilepsy	1,89E-03			CPA6, HMGB1, RELN	3
Hereditary Disorder, Ophthalmic Disease, Organismal Injury and Abnormalities	Age-related macular degeneration type 14	3,89E-04			C2, CFB	2
Cell-To-Cell Signaling and Interaction, Nervous System Development and Function	Aggregation of cortical neurons	3,89E-04			CDH2, CDK5R1	2
Connective Tissue Development and Function, Skeletal and Muscular System Development and Function	Association of C6 vertebra	3,89E-04			PHC1, PHC2	2
Connective Tissue Development and Function, Skeletal and Muscular System Development and Function	Association of rib	3,89E-04			PHC1, PHC2	2
Amino Acid Metabolism, Small Molecule Biochemistry	Catabolism of isoleucine	3,89E-04			ACAT1, BCAT2	2
Cellular Compromise, Connective Tissue Disorders, Organismal Injury and Abnormalities, Tissue Morphology	Degeneration of type I fibrocytes	3,89E-04			NDP, SLC26A4	2
Cell-To-Cell Signaling and Interaction, Dermatological Diseases and Conditions, Organismal Injury and Abnormalities	Detachment of corneocytes	3,89E-04			PI3, SLPI	2
Cancer, Endocrine System Disorders, Organismal Injury and Abnormalities	Hyperplasia of thyroid follicle	3,89E-04			NTRK1, TPR	2
Hereditary Disorder, Organismal Injury and Abnormalities, Skeletal and Muscular Disorders	Myotilinopathy	3,89E-04			MYOT, REST	2
Small Molecule Biochemistry	Quantity of 2-phenethylamine	3,89E-04			MAOB, NDP	2
Embryonic Development	Shrinkage of tail bud	3,89E-04			PHC1, PHC2	2
Auditory and Vestibular System Development and Function, Organ Morphology, Organismal Development	Size of endolymphatic duct	3,89E-04			EPHB2, SIX1	2
Cell Morphology, Cell-To-Cell Signaling and Interaction, Cellular Assembly and Organization, Nervous System Development and Function, Tissue Morphology	Structure of synapse	3,89E-04			APP, CDH2	2
Cell Morphology, Cellular Function and Maintenance	Transmembrane potential of tumor cell lines	3,89E-04			BCL2L1, HNF4A	2
Auditory Disease, Auditory and Vestibular System Development and Function, Cell Morphology, Developmental Disorder, Embryonic Development, Nervous System Development and Function, Organ Morphology, Organismal Development, Organismal Injury and Abnormalities, Tissue Morphology	Abnormal morphology of strial intermediate cells	1,15E-03			NDP, SLC26A4	2
Auditory Disease, Organismal Injury and Abnormalities	Abnormality of vestibular endolymph	1,15E-03			EPHB2, SLC26A4	2
Cellular Compromise, Reproductive System Development and Function	Acidification of gonadal cell lines	1,15E-03			ABCB1, SLC7A5	2
Lipid Metabolism, Small Molecule Biochemistry	Activation of glucocorticoid	1,15E-03			MAPK8, MIF	2
DNA Replication, Recombination, and Repair, RNA Post-Transcriptional Modification	Annealing of hnRNA	1,15E-03			HNRNPA1, HNRNPU	2
Cell Death and Survival	Apoptosis of recent thymic emigrants	1,15E-03			FAS, IL2	2
Hereditary Disorder, Ophthalmic Disease, Organismal Injury and Abnormalities	Atrophia bulborum hereditaria	1,15E-03			MAOB, NDP	2
Cell Death and Survival	Cytotoxicity of gemcitabine	1,15E-03			BCL2L1, CHEK1	2
Embryonic Development, Organismal Development, Tissue Development	Development of presphenoid bone	1,15E-03			PHC1, PHC2	2
Cellular Compromise, Skeletal and Muscular Disorders, Tissue Morphology	Disorganization of myofiber	1,15E-03			ACSL1, SIX1	2
Organismal Injury and Abnormalities	Edema of interstitial tissue	1,15E-03			HMGB1, NT5E	2
Neurological Disease, Organismal Injury and Abnormalities	Familial temporal lobe epilepsy	1,15E-03			CPA6, RELN	2
Connective Tissue Development and Function, Embryonic Development, Organ Development, Organismal Development, Skeletal and Muscular System Development and Function, Tissue Development	Formation of occipital bone	1,15E-03			PHC1, PHC2	2
Cell Cycle, Embryonic Development	Mitosis of embryonic stem cells	1,15E-03			CHEK1, KDM5B	2
Cell Morphology, Cellular Assembly and Organization, Nervous System Development and Function	Orientation of dendrites	1,15E-03			CDK5R1, RELN	2
Neurological Disease, Organismal Injury and Abnormalities	Pathogenesis of brain	1,15E-03			APP, HMGB1	2
