# Supplementary material for: Subclinical endometritis in dairy cattle is associated with distinct mRNA expression patterns in blood and endometrium
Source: PLoS One. 2019 Aug 2;14(8):e0220244. doi: 10.1371/journal.pone.0220244 (PMC6677313; doi:10.1371/journal.pone.0220244)
Supplement: S8 Table — (XLSX) [file pone.0220244.s014.xlsx]

## Sheet: Feuil1
Ingenuity Canonical Pathways	-log(p-value)	Ratio	z-score	Molecules	# Molecules
Hepatic Fibrosis / Hepatic Stellate Cell Activation	4.03	0.0695		PDGFD, TNFRSF1B, VEGFD, LHX2, MYL6B, COL4A5, LBP, LEPR, TNFRSF11B, COL9A3, COL11A1, TGFBR1, FAS	13
Hepatic Cholestasis	3.46	0.0688		TNFRSF11B, ABCB1, IL2, PRKCA, TNFRSF1B, SLCO1A2, ADCY2, LBP, HNF4A, MAPK8, IL37	11
Reelin Signaling in Neurons	3.32	0.087		RELN, CDK5R1, MAPK8IP1, PIK3R4, ITGA6, APP, MAPK8, LRP8	8
NF-κB Signaling	3.01	0.0608	-0.302	TNFRSF11B, TNFRSF1B, MAP3K8, PIK3R4, NTRK1, TRA, MAPK8, TGFBR1, IGF2R, CARD10, IL37	11
LPS/IL-1 Mediated Inhibition of RXR Function	2.79	0.0541	1.134	TNFRSF11B, ABCB1, GSTM1, ACSL1, PPARGC1A, TNFRSF1B, GSTM2, SLCO1A2, LBP, MAPK8, MAOB, IL37	12
Glioma Signaling	2.72	0.0702	-0.816	PDGFD, CALM1 (includes others), PRKCA, CDKN2C, CDKN2D, PIK3R4, CAMK1D, IGF2R	8
Acute Phase Response Signaling	2.68	0.0588	1.134	TNFRSF11B, SAA1, CFB, C2, C3, TNFRSF1B, LBP, MAPK8, AHSG, IL37	10
PPAR Signaling	2.56	0.0737	-0.378	TNFRSF11B, PDGFD, PPARGC1A, SNW1, TNFRSF1B, HSP90AB1, IL37	7
CCR5 Signaling in Macrophages	2.56	0.0737		CALM1 (includes others), PRKCA, TRA, MAPK8, FAS, CD247, GNB2	7
LXR/RXR Activation	2.55	0.0661	0	TNFRSF11B, SAA1, S100A8, C3, TNFRSF1B, LBP, AHSG, IL37	8
T Helper Cell Differentiation	2.5	0.0822		TNFRSF11B, IL2, TNFRSF1B, CXCR5, TRA, TGFBR1	6
EIF2 Signaling	2.33	0.0498	-2	RPS27L, RPL9, HNRNPA1, EIF2S2, EIF3A, PIK3R4, RPS28, RPL35A, RPL31, RPS4X, RPS3	11
HMGB1 Signaling	2.3	0.0602	-0.707	TNFRSF11B, IL2, HMGB1, TNFRSF1B, PIK3R4, MAPK8, SELE, RHOV	8
Regulation of IL-2 Expression in Activated and Anergic T Lymphocytes	2.3	0.075		IL2, CALM1 (includes others), TRA, MAPK8, TGFBR1, CD247	6
Type I Diabetes Mellitus Signaling	2.19	0.0631	0	TNFRSF11B, IL2, TNFRSF1B, TRA, MAPK8, FAS, CD247	7
mTOR Signaling	2.17	0.0498	-1	RPS27L, PRKCA, EIF3A, PIK3R4, VEGFD, RPS28, RPS4X, RHOV, MAPKAP1, RPS3	10
Induction of Apoptosis by HIV1	2.15	0.082	-0.447	TNFRSF11B, TNFRSF1B, BCL2L1, MAPK8, FAS	5
Apoptosis Signaling	2.05	0.0667	0	PRKCA, BCL2A1, TNFRSF1B, BCL2L1, MAPK8, FAS	6
Axonal Guidance Signaling	2.05	0.0376		ROBO2, PDGFD, ARPC3, PTCH1, ADAM23, PIK3R4, VEGFD, MYL6B, EPHB2, GNB2, WNT2B, PRKCA, ADAMTS5, SEMA3A, NTRK1, EFNA3, SRGAP2	17
PXR/RXR Activation	2.04	0.0769		ABCB1, GSTM1, PPARGC1A, GSTM2, HNF4A	5
Granulocyte Adhesion and Diapedesis	2.03	0.0503		TNFRSF11B, CCL19, PF4, CCL28, TNFRSF1B, ITGA6, SELE, SDC3, IL37	9
Osteoarthritis Pathway	2.01	0.0472	1.414	S100A8, PPARGC1A, HMGB1, TNFRSF1B, PTCH1, ADAMTS5, VEGFD, FGF18, TGFBR1, MYBBP1A	10
Type II Diabetes Mellitus Signaling	1.94	0.0519	-0.816	TNFRSF11B, IRS4, SMPD2, ACSL1, PRKCA, TNFRSF1B, PIK3R4, MAPK8	8
FXR/RXR Activation	1.9	0.0556		SAA1, PPARGC1A, C3, HNF4A, MAPK8, AHSG, IL37	7
Xenobiotic Metabolism Signaling	1.88	0.0414		ABCB1, GSTM1, PPARGC1A, PRKCA, SNW1, MAP3K8, PIK3R4, GSTM2, CAMK1D, MAPK8, HSP90AB1, MAOB	12
IL-6 Signaling	1.86	0.0547	-0.816	TNFRSF11B, ABCB1, TNFRSF1B, PIK3R4, LBP, MAPK8, IL37	7
Antiproliferative Role of TOB in T Cell Signaling	1.85	0.115		IL2, TGFBR1, PABPC4	3
Graft-versus-Host Disease Signaling	1.83	0.0833		IL2, TRA, FAS, IL37	4
CD28 Signaling in T Helper Cells	1.8	0.053	-0.447	IL2, CALM1 (includes others), ARPC3, PIK3R4, TRA, MAPK8, CD247	7
Role of Osteoblasts, Osteoclasts and Chondrocytes in Rheumatoid Arthritis	1.75	0.0429		WNT2B, TNFRSF11B, CALM1 (includes others), TNFRSF1B, CALCR, ADAMTS5, PIK3R4, SFRP1, MAPK8, IL37	10
Cdc42 Signaling	1.74	0.0479	-0.707	CLIP1, FGD3, ARPC3, MYL6B, TRA, MAPK8, CD247, TNK2	8
Docosahexaenoic Acid (DHA) Signaling	1.72	0.0769		BCL2A1, PIK3R4, APP, BCL2L1	4
Acetyl-CoA Biosynthesis III (from Citrate)	1.7	1		ACLY	1
Role of Macrophages, Fibroblasts and Endothelial Cells in Rheumatoid Arthritis	1.66	0.0385		WNT2B, TNFRSF11B, PDGFD, CALM1 (includes others), PRKCA, TNFRSF1B, PIK3R4, VEGFD, SFRP1, SELE, MIF, IL37	12
Germ Cell-Sertoli Cell Junction Signaling	1.66	0.0462		CDH2, EPN2, MAP3K8, PIK3R4, ITGA6, MAPK8, TGFBR1, RHOV	8
p53 Signaling	1.64	0.0541	0	ADGRB1, PIK3R4, BCL2L1, MAPK8, FAS, CHEK1	6
Telomerase Signaling	1.64	0.0541	0	IL2, ELF5, DKC1, PIK3R4, ELF2, HSP90AB1	6
Cytotoxic T Lymphocyte-mediated Apoptosis of Target Cells	1.61	0.0938		TRA, FAS, CD247	3
Epithelial Adherens Junction Signaling	1.58	0.0479		CDH2, EPN2, CLIP1, ARPC3, LMO7, MYL6B, TGFBR1	7
HGF Signaling	1.57	0.0522	-1	ELF5, PRKCA, MAP3K8, PIK3R4, ELF2, MAPK8	6
Leptin Signaling in Obesity	1.56	0.0581	-1	AGRP, PIK3R4, ADCY2, LEPR, NPY	5
α-Adrenergic Signaling	1.54	0.0575	0	CALM1 (includes others), PYGL, PRKCA, ADCY2, GNB2	5
Signaling by Rho Family GTPases	1.54	0.0397	-0.707	SEPT8, CDH2, CLIP1, ARPC3, SEPT11, PIK3R4, MYL6B, MAPK8, RHOV, GNB2	10
Isoleucine Degradation I	1.52	0.143		ACAT1, BCAT2	2
Altered T Cell and B Cell Signaling in Rheumatoid Arthritis	1.48	0.0556		IL2, TNFRSF13C, TRA, FAS, IL37	5
OX40 Signaling Pathway	1.47	0.0549	0.447	IL2, TRA, BCL2L1, MAPK8, CD247	5
Telomere Extension by Telomerase	1.46	0.133		HNRNPA1, HNRNPA2B1	2
Complement System	1.44	0.0811		CFB, C2, C3	3
Regulation of eIF4 and p70S6K Signaling	1.44	0.0446		RPS27L, EIF2S2, EIF3A, PIK3R4, RPS28, RPS4X, RPS3	7
Ceramide Signaling	1.43	0.0538	0	TNFRSF11B, SMPD2, TNFRSF1B, PIK3R4, MAPK8	5
Actin Cytoskeleton Signaling	1.43	0.0396	-1.633	PDGFD, FGD3, ARPC3, PIK3R4, TIAM1, MYL6B, LBP, FGF18, SSH2	9
Glucocorticoid Receptor Signaling	1.42	0.0354		IL2, HMGB1, PIK3R4, SLPI, KRT80, TRA, BCL2L1, MAPK8, TGFBR1, HSP90AB1, SELE, CD247	12
Production of Nitric Oxide and Reactive Oxygen Species in Macrophages	1.41	0.0412	0	TNFRSF11B, S100A8, PRKCA, TNFRSF1B, MAP3K8, PIK3R4, MAPK8, RHOV	8
Glutaryl-CoA Degradation	1.41	0.125		CA1, ACAT1	2
Glycine Biosynthesis I	1.41	0.5		SHMT1	1
Calcium-induced T Lymphocyte Apoptosis	1.38	0.0606		CALM1 (includes others), PRKCA, TRA, CD247	4
RAN Signaling	1.36	0.118		RAN, RANBP1	2
Clathrin-mediated Endocytosis Signaling	1.35	0.0402		S100A8, PDGFD, ARPC3, PIK3R4, VEGFD, AMPH, FGF18, EPHB2	8
Cardiac Hypertrophy Signaling	1.34	0.0381	-0.707	CALM1 (includes others), MAP3K8, PIK3R4, MYL6B, ADCY2, MAPK8, TGFBR1, RHOV, GNB2	9
CXCR4 Signaling	1.34	0.0424	-0.816	PRKCA, PIK3R4, MYL6B, ADCY2, MAPK8, RHOV, GNB2	7
GP6 Signaling Pathway	1.3	0.0448	-1.633	COL9A3, CALM1 (includes others), PRKCA, COL11A1, PIK3R4, COL4A5	6
Molecular Mechanisms of Cancer	1.3	0.033		CDKN2C, PTCH1, PIK3R4, WNT2B, PRKCA, CDKN2D, ADCY2, BCL2L1, MAPK8, TGFBR1, FAS, RHOV, CHEK1	13
