# Supplementary material for: Subclinical endometritis in dairy cattle is associated with distinct mRNA expression patterns in blood and endometrium
Source: PLoS One. 2019 Aug 2;14(8):e0220244. doi: 10.1371/journal.pone.0220244 (PMC6677313; doi:10.1371/journal.pone.0220244)
Supplement: S11 Table — (XLSX) [file pone.0220244.s017.xlsx]

## Sheet: Feuil1
Categories	Diseases or Functions Annotation	p-Value	Predicted Activation State	Activation z-score	Molecules	# Molecules
Tissue Development	Development of epithelial tissue	5.37e-09		0.852	ABCA3,ADAMTS2,ADGRB1,ATOH1,ATOH8,C3,CD36,CDH1,CFAP53,CSF1R,CXCL12,CXCL8,CYP4F2,ECM1,HEG1,HIF1AN,HRH1,IGF2,LHX2,MCAM,MITF,MYOF,NME1,NOTCH4,NRP2,PF4,SCARB1,SPRED1,STX2,THBS1,VCAM1	31
Gastrointestinal Disease, Organismal Injury and Abnormalities	Damage of intestine	2.33e-08		0.922	C2,C3AR1,CBLB,CFB,CFH,CSF1R,LTF,STX2,TLR2	9
Cardiovascular System Development and Function, Cellular Development, Cellular Function and Maintenance, Cellular Growth and Proliferation, Organismal Development, Tissue Development	Endothelial cell development	5.66e-08		-0.184	ADAMTS2,ADGRB1,ATOH8,C3,CD36,CSF1R,CXCL12,CXCL8,CYP4F2,ECM1,HEG1,HIF1AN,HRH1,IGF2,MCAM,MYOF,NOTCH4,NRP2,PF4,SCARB1,SPRED1,THBS1,VCAM1	23
Cellular Movement	Migration of cells	8.96e-08	Increased	3.271	ADGRB1,AHNAK,APLP2,AQP9,ATOH1,ATOH8,BBS4,C2,C3,C3AR1,CACNA1D,CARD10,CBLB,CCDC141,CD300LB,CD36,CDH1,CFB,CFH,COL6A1,COL7A1,CSF1R,CST6,CTNND1,CXCL12,CXCL8,CYGB,DCX,DOCK3,DOCK4,DUSP5,ECM1,EFEMP1,FCGR3A/FCGR3B,GALNT2,GPR183,HIF1AN,HRH1,ID3,IGF2,IGF2BP3,IL15RA,KIF20B,LTF,MCAM,MITF,MRAS,MTUS1,NME1,NOTCH4,NRP2,OSGIN1,OSMR,PARD6B,PF4,PIGR,PRKCI,RALBP1,SCARB1,SCPEP1,SEMA3C,SERPING1,SLIT3,SMURF1,SYNE2,THBS1…	71
Cancer, Organismal Injury and Abnormalities	Non-melanoma solid tumor	4.61e-07		-1.691	ADGRB1,AKR1B1,AQP9,ATOH1,C1R,C3,C3AR1,CACNA1D,CADPS,CALD1,CD1A,CD36,CDH1,CDHR5,CFB,CFH,CHRM5,COL6A1,COL7A1,CPA3,CSF1R,CST6,CTDSPL,CTNND1,CXCL12,CXCL8,CYB5R2,CYGB,DCX,DMTF1,DNAH7,DUSP5,ECI2,ECM1,EFEMP1,ETS2,FAM20C,FCGR3A/FCGR3B,GABRD,GADD45G,GSTM3,GUCY1A2,HSPB8,ID3,IGF2,IGF2BP3,IKBIP,IL15RA,ING5,ITPR2,KIF20B,KPNB1,LDLRAD3,LHX2,LTF,MCAM,MITF,MR1,MTUS1,NME1,NMT2,NOTCH4,NRP2,NUDT21,OAS1,OSMR,PBX1,PF4…	95
Cancer, Organismal Injury and Abnormalities	Cancer	4.96e-07		-0.476	ADGRB1,AFAP1L2,AKR1B1,ANK3,AQP9,ATOH1,C1R,C2,C3,C3AR1,CACNA1D,CADPS,CALD1,CD1A,CD36,CDH1,CDHR5,CEP55,CFB,CFH,CHRM5,COL6A1,COL7A1,COX6B1,CPA3,CSF1R,CST6,CTDSPL,CTNND1,CXCL12,CXCL8,CYB5R2,CYGB,DCX,DMTF1,DNAH7,DOCK4,DUSP5,ECI2,ECM1,EFEMP1,ETS2,FAM20C,FCGR3A/FCGR3B,GABRD,GADD45G,GPR183,GSTM3,HRH1,HSPB8,ID3,IGF2,IGF2BP3,IKBIP,IL15RA,ING5,IRAK2,ITPR2,KIF20B,KPNB1,LDLRAD3,LHX2,LTF,MCAM,MEIS1,MITF,MR1,MT…	116
Cellular Movement	Cell movement	5.84e-07	Increased	3.424	ADGRB1,AHNAK,AKR1B1,APLP2,AQP9,ATOH1,ATOH8,BBS4,C2,C3,C3AR1,CACNA1D,CARD10,CBLB,CCDC141,CD300LB,CD36,CDH1,CFB,CFH,COL6A1,COL7A1,CSF1R,CST6,CTNND1,CXCL12,CXCL8,CYGB,DCX,DOCK3,DOCK4,DUSP5,ECM1,EFEMP1,FCGR3A/FCGR3B,GALNT2,GPR183,HIF1AN,HRH1,ID3,IGF2,IGF2BP3,IL15RA,KIF20B,LTF,MCAM,MITF,MRAS,MTUS1,NME1,NOTCH4,NRP2,OSGIN1,OSMR,PARD3,PARD6B,PARVB,PF4,PIGR,PRKCI,RALBP1,SCARB1,SCPEP1,SEMA3C,SERPING1,SIVA1…	75
Cancer, Organismal Injury and Abnormalities	Malignant solid tumor	6.42e-07		-1.72	ADGRB1,AKR1B1,ANK3,AQP9,ATOH1,C1R,C2,C3,C3AR1,CADPS,CALD1,CD1A,CD36,CDH1,CDHR5,CEP55,CFB,CFH,CHRM5,COL6A1,COL7A1,COX6B1,CPA3,CSF1R,CST6,CTDSPL,CTNND1,CXCL12,CXCL8,CYB5R2,CYGB,DCX,DMTF1,DNAH7,DUSP5,ECI2,ECM1,EFEMP1,ETS2,FAM20C,FCGR3A/FCGR3B,GABRD,GADD45G,GPR183,GSTM3,HRH1,HSPB8,ID3,IGF2,IGF2BP3,IKBIP,IL15RA,ING5,ITPR2,KIF20B,KPNB1,LDLRAD3,LHX2,LTF,MCAM,MEIS1,MITF,MTUS1,NFYC,NME1,NMT2,NOTCH4,NRP2,N…	108
Cell-To-Cell Signaling and Interaction	Response of myeloid leukocytes	9.29e-07	Increased	2.288	C3,C3AR1,CD36,CFH,CLEC6A,CXCL8,FCGR3A/FCGR3B,SCARB1,THBS1,TLR2,VCAM1	11
Gastrointestinal Disease, Organismal Injury and Abnormalities	Injury of intestine	1.02e-06		0.73	C2,C3AR1,CFB,CFH,STX2,TLR2	6
Cell-To-Cell Signaling and Interaction, Cellular Compromise, Tumor Morphology	Adhesion of cancer cells	1.19e-06		-0.394	AKR1B1,CDH1,CXCL12,CXCL8,MCAM,THBS1,VCAM1	7
Immunological Disease	Systemic autoimmune syndrome	1.25e-06		-0.447	ACTL6A,APLP2,AQP9,C1R,C2,C3,C3AR1,CACNA1D,CALD1,CBLB,CD1A,CD36,CDH1,CFB,CFH,CHRM5,CLEC4D,CLEC6A,COL6A1,COL7A1,CXCL12,CXCL8,ECM1,FCGR3A/FCGR3B,GABRD,HRH1,HSPB8,KIR3DL2,LDLRAD3,LTF,MITF,MR1,NMT2,OAS1,SERPING1,THBS1,TLR2,TPM2,VCAM1,ZNF280B	40
Cardiovascular System Development and Function, Cellular Development, Cellular Function and Maintenance, Cellular Growth and Proliferation, Organismal Development, Tissue Development	Proliferation of endothelial cells	1.27e-06		-0.747	ADAMTS2,ATOH8,C3,CD36,CSF1R,CXCL12,CXCL8,CYP4F2,ECM1,HIF1AN,HRH1,IGF2,MCAM,MYOF,NRP2,PF4,SCARB1,SPRED1,THBS1	19
Cellular Movement	Cell movement of carcinoma cell lines	1.45e-06		1.135	CDH1,CTNND1,CXCL12,CXCL8,DOCK4,GALNT2,HIF1AN,IGF2BP3,MITF,MTUS1,NME1,NRP2,PRKCI,TLR2,VCAM1,ZMYND10	16
Cancer, Organismal Injury and Abnormalities	Nonhematologic malignant neoplasm	2.39e-06		-1.292	ADGRB1,AKR1B1,ANK3,AQP9,ATOH1,C1R,C2,C3,C3AR1,CADPS,CALD1,CD1A,CD36,CDH1,CDHR5,CEP55,CFB,CFH,CHRM5,COL6A1,COX6B1,CPA3,CSF1R,CST6,CTDSPL,CTNND1,CXCL12,CXCL8,CYGB,DCX,DNAH7,DUSP5,ECM1,EFEMP1,ETS2,FAM20C,FCGR3A/FCGR3B,GABRD,GPR183,GSTM3,HRH1,HSPB8,ID3,IGF2,IGF2BP3,IL15RA,ING5,KIF20B,LDLRAD3,LHX2,LTF,MCAM,MEIS1,MITF,MTUS1,NFYC,NME1,NMT2,NOTCH4,NRP2,NRXN1,NUDT21,NUP98,OAS1,OSMR,PBX1,PF4,PIGR,PKP4,POU6…	98
Cancer, Organismal Injury and Abnormalities	Tumorigenesis of tissue	2.92e-06		-0.879	AKR1B1,AQP9,ATOH1,C1R,C3,C3AR1,CACNA1D,CADPS,CALD1,CBLB,CD1A,CD36,CDH1,CDHR5,CFB,CFH,COL7A1,CPA3,CSF1R,CST6,CTDSPL,CTNND1,CXCL12,CXCL8,CYGB,DNAH7,DUSP5,ECM1,ETS2,FAM20C,FCGR3A/FCGR3B,GABRD,HSPB8,ID3,IGF2,IGF2BP3,IL15RA,ING5,IRAK2,KIF20B,LDLRAD3,LHX2,LTF,MCAM,MEIS1,MITF,MR1,MTUS1,NME1,NMT2,NOTCH4,NRP2,NUP98,OAS1,OSMR,PBX1,PF4,PIGR,PRKCI,RALBP1,SCAND1,SCG5,SELENOP,SEMA3C,SERPING1,SLC1A4,SLC45A3,SLI…	80
Embryonic Development, Hematological System Development and Function, Lymphoid Tissue Structure and Development, Organ Development, Organismal Development, Tissue Development	Lymphangiogenesis	3.26e-06		-1.446	ACVR2B,CXCL12,CXCL8,HEG1,IGF2,NRP2,SPRED1,VCAM1	8
Cardiovascular System Development and Function, Organismal Development	Vasculogenesis	3.28e-06		-0.134	ACVR2B,ADAMTS2,ADGRB1,AKR1B1,ATOH8,C3,C3AR1,CD36,CDH1,CFB,CSF1R,CXCL12,CXCL8,CYGB,CYP4F2,ECM1,HEG1,HIF1AN,HRH1,ID3,IGF2,KIF7,MCAM,MYOF,NOTCH4,NRP2,PBX1,PF4,SCARB1,SEMA3C,SLIT3,SPRED1,THBS1,VCAM1	34
Cellular Movement	Migration of carcinoma cell lines	3.92e-06		0.641	CDH1,CTNND1,CXCL12,CXCL8,GALNT2,HIF1AN,IGF2BP3,MITF,MTUS1,NRP2,PRKCI,TLR2,VCAM1,ZMYND10	14
Cancer, Organismal Injury and Abnormalities	Solid tumor	4.1e-06	Decreased	-2.064	ADGRB1,AKR1B1,ANK3,AQP9,ATOH1,C1R,C2,C3,C3AR1,CACNA1D,CADPS,CALD1,CD1A,CD36,CDH1,CDHR5,CEP55,CFB,CFH,CHRM5,COL6A1,COL7A1,COX6B1,CPA3,CSF1R,CST6,CTDSPL,CTNND1,CXCL12,CXCL8,CYB5R2,CYGB,DCX,DMTF1,DNAH7,DUSP5,ECI2,ECM1,EFEMP1,ETS2,FAM20C,FCGR3A/FCGR3B,GABRD,GADD45G,GPR183,GSTM3,GUCY1A2,HRH1,HSPB8,ID3,IGF2,IGF2BP3,IKBIP,IL15RA,ING5,ITPR2,KIF20B,KPNB1,LDLRAD3,LHX2,LTF,MCAM,MEIS1,MITF,MR1,MTUS1,NFYC,NME…	113
Cancer, Organismal Injury and Abnormalities, Reproductive System Disease	Prostate Cancer and Tumors	5.27e-06			AKR1B1,C1R,C3,CALD1,CDH1,CFB,CFH,CHRM5,COL7A1,CSF1R,CTDSPL,ETS2,FCGR3A/FCGR3B,GPR183,HRH1,ID3,IGF2,LTF,MTUS1,NFYC,NME1,NMT2,SERPING1,SLC45A3,SRD5A1,TLR2	26
Cell Death and Survival	Cell death of tumor cell lines	5.29e-06		-1.208	ABCA3,ACVR2B,AKR1B1,ARID3B,ARMC10,BBS4,CADPS,CDH1,CFH,COX6B1,CSF1R,CTNND1,CXCL12,CXCL8,CYGB,DYNC1H1,EFEMP1,ETS2,EVA1C,FETUB,GADD45G,GRK5,HSPB8,ID3,IGF2,IL15RA,IRAK2,ITPR2,KPNB1,MITF,MTUS1,NME1,NOTCH4,NRP2,OSGIN1,PBX1,PIGR,POLK,PRKCI,RALBP1,SALL2,SCARB1,SIVA1,SLC11A2,SLC28A3,SMURF1,SNX33,THBS1,TLR2,TRIM32,TRPM2,TTC5,ULK2,ZMYND10,ZNF280B	55
Cancer, Organismal Injury and Abnormalities, Reproductive System Disease	Male genital neoplasm	6.57e-06			AKR1B1,C1R,C3,CALD1,CDH1,CFB,CFH,CHRM5,COL7A1,CSF1R,CTDSPL,ETS2,FAM20C,FCGR3A/FCGR3B,GPR183,HRH1,ID3,IGF2,ING5,LTF,MTUS1,NFYC,NME1,NMT2,SERPING1,SLC45A3,SRD5A1,TLR2	28
Cell-To-Cell Signaling and Interaction, Cellular Assembly and Organization	Cell-cell contact	6.6e-06		-1.059	ADGRB1,ANK3,APLP2,ATOH1,C3,CACNA1D,CD36,CDH1,CDH10,CHRM5,CRISP2,CSF1R,CTNND1,CXCL12,CXCL8,GPR183,IGF2,MCAM,MYOF,NME1,NRXN1,PARD3,PARD6B,PKP4,PRKCI,SYNE2,THBS1,TLR2,VCAM1	29
Connective Tissue Disorders, Immunological Disease, Inflammatory Disease, Inflammatory Response, Organismal Injury and Abnormalities, Skeletal and Muscular Disorders	Rheumatoid arthritis	6.6e-06			ACTL6A,APLP2,AQP9,C1R,C2,C3AR1,CACNA1D,CALD1,CD1A,CD36,CDH1,CFB,CHRM5,CLEC4D,CXCL12,CXCL8,FCGR3A/FCGR3B,GABRD,HRH1,HSPB8,KIR3DL2,LDLRAD3,LTF,NMT2,THBS1,TLR2,TPM2,VCAM1,ZNF280B	29
Cellular Movement	Cell movement of tumor cell lines	6.75e-06	Increased	2.398	AHNAK,C3,CACNA1D,CARD10,CBLB,CD36,CDH1,CSF1R,CST6,CTNND1,CXCL12,CXCL8,DOCK4,DUSP5,ECM1,EFEMP1,GALNT2,HIF1AN,HRH1,IGF2,IGF2BP3,MCAM,MITF,MRAS,MTUS1,NME1,NRP2,OSGIN1,PARD3,PARVB,PRKCI,RALBP1,SEMA3C,SIVA1,THBS1,TLR2,VCAM1,ZMYND10	38
Cell-To-Cell Signaling and Interaction	Adhesion of lung cancer cell lines	7.55e-06		-0.563	CDH1,CFH,CXCL12,THBS1,VCAM1	5
Cellular Development, Cellular Growth and Proliferation, Hematological System Development and Function, Hematopoiesis, Lymphoid Tissue Structure and Development, Tissue Development	Proliferation of myeloid progenitor cells	9.4e-06		-0.816	ACTL6A,CSF1R,CXCL8,MEIS1,NUP98,PBX1,PF4	7
Digestive System Development and Function	Salivation	9.54e-06		-0.651	BBS4,CHRM5,GRK5,ID3,ITPR2	5
Cell-To-Cell Signaling and Interaction	Adhesion of blood cells	9.92e-06		1.655	ADGRB1,C3,CBLB,CD36,CDH1,CFH,CXCL12,CXCL8,FCGR3A/FCGR3B,GP5,LTF,MCAM,MITF,MRAS,PF4,SCARB1,SERPING1,THBS1,TLR2,VCAM1	20
Cell Death and Survival	Necrosis	1.02e-05		-0.365	ABCA3,ACVR2B,AFAP1L2,AKR1B1,ARID3B,ARMC10,ATOH1,BBS4,C3,C3AR1,CADPS,CAMK2A,CD300LB,CD36,CDH1,CFH,COL6A1,COX6B1,CSF1R,CTNND1,CXCL12,CXCL8,CYGB,DUSP5,DYNC1H1,EFEMP1,ETS2,EVA1C,FCGR3A/FCGR3B,FETUB,GABRD,GADD45G,GRK5,GUCY1A2,HIF1AN,HSPB8,HSPBAP1,ID3,IGF2,IL15RA,IRAK2,ITPR2,KIR3DL2,KPNB1,LTF,MCAM,MITF,MTUS1,NME1,NOTCH4,NRP2,OSGIN1,OSMR,PBX1,PF4,PIGR,POLK,POLR3E,PRKCI,RALBP1,RPL38,SALL2,SCARB1,SCG5,SEL…	81
Cell-To-Cell Signaling and Interaction	Response of granulocytes	1.03e-05	Increased	2.203	C3,CD36,CFH,CLEC6A,CXCL8,FCGR3A/FCGR3B,THBS1,TLR2,VCAM1	9
Cancer, Organismal Injury and Abnormalities	Advanced malignant tumor	1.06e-05		0.276	ANK3,C1R,C3,CALD1,CD36,CDH1,CFH,CHRM5,CSF1R,CTNND1,CXCL12,CXCL8,DOCK4,EFEMP1,FCGR3A/FCGR3B,GABRD,GSTM3,HRH1,ID3,IGF2,IL15RA,LTF,MCAM,MEIS1,MITF,MTUS1,NME1,NOTCH4,NRP2,PARD3,PRKCI,RALBP1,SEMA3C,SERPING1,SRD5A1,STX2,THBS1,TLR2,VCAM1	39
Cell-To-Cell Signaling and Interaction, Hematological System Development and Function, Immune Cell Trafficking	Adhesion of immune cells	1.07e-05		1.71	ADGRB1,C3,CBLB,CD36,CDH1,CFH,CXCL12,CXCL8,FCGR3A/FCGR3B,LTF,MCAM,MITF,MRAS,PF4,SCARB1,SERPING1,THBS1,TLR2,VCAM1	19
Cellular Function and Maintenance, Hematological System Development and Function	Engulfment of myeloid cells	1.13e-05	Increased	2.592	C3,C3AR1,CD36,CFH,CLEC6A,CSF1R,CTNND1,FCGR3A/FCGR3B,PF4,SCARB1,THBS1,TLR2	12
Cell-To-Cell Signaling and Interaction, Cellular Function and Maintenance, Hematological System Development and Function, Inflammatory Response	Phagocytosis by microglia	1.19e-05		0.728	C3,C3AR1,CD36,SCARB1,TLR2	5
Cancer, Organismal Injury and Abnormalities, Reproductive System Disease	Malignant neoplasm of male genital organ	1.23e-05			C1R,C3,CALD1,CDH1,CFB,CFH,CHRM5,COL7A1,CTDSPL,ETS2,FAM20C,FCGR3A/FCGR3B,GPR183,HRH1,ID3,IGF2,ING5,LTF,MTUS1,NFYC,NME1,NMT2,SERPING1,SLC45A3,SRD5A1,TLR2	26
Cancer, Hematological Disease, Organismal Injury and Abnormalities	Lymphohematopoietic neoplasia	1.44e-05		-1.554	ADGRB1,C1R,C3,CACNA1D,CALD1,CBLB,CD1A,CD36,CDH1,CHRM5,COL6A1,CSF1R,CTNND1,CXCL12,CXCL8,CYB5R2,DMTF1,DUSP5,ECI2,FCGR3A/FCGR3B,GABRD,GADD45G,ID3,IGF2,IKBIP,IRAK2,ITPR2,KPNB1,LDLRAD3,MCAM,MEIS1,MR1,NME1,NMT2,NUP98,OAS1,OSMR,PARD3,PBX1,PF4,PRKCI,SCARB1,SEMA3C,SLIT3,SYNE2,THBS1,TLR2,TOB1,VCAM1,ZNF280B	50
Cell-To-Cell Signaling and Interaction, Hematological System Development and Function, Inflammatory Response	Immune response of neutrophils	1.53e-05		1.97	C3,CD36,CFH,CLEC6A,CXCL8,FCGR3A/FCGR3B,THBS1,VCAM1	8
Cancer, Organismal Injury and Abnormalities	Neoplasia of epithelial tissue	1.55e-05		-1.143	AKR1B1,AQP9,ATOH1,C1R,C3,C3AR1,CACNA1D,CADPS,CALD1,CD1A,CDH1,CDHR5,CFB,CFH,COL7A1,CPA3,CSF1R,CST6,CTDSPL,CTNND1,CXCL12,CXCL8,CYGB,DNAH7,DUSP5,ECM1,ETS2,FAM20C,FCGR3A/FCGR3B,GABRD,HSPB8,ID3,IGF2,IGF2BP3,IL15RA,ING5,KIF20B,LDLRAD3,LHX2,LTF,MCAM,MITF,MTUS1,NME1,NMT2,NOTCH4,NRP2,OAS1,OSMR,PBX1,PF4,PIGR,PRKCI,RALBP1,SCAND1,SCG5,SELENOP,SEMA3C,SERPING1,SLC1A4,SLC45A3,SLIT3,SMYD2,SPAG17,SRM,STX2,TBC1D9,…	74
Cancer, Organismal Injury and Abnormalities	Cancer of secretory structure	1.59e-05		-1.945	C1R,C3,CALD1,CDH1,CFB,CFH,CHRM5,COL7A1,CSF1R,CTDSPL,CTNND1,CXCL12,ETS2,FCGR3A/FCGR3B,GABRD,GPR183,HRH1,ID3,IGF2,LDLRAD3,LTF,MTUS1,NFYC,NME1,NMT2,SERPING1,SLC45A3,SMYD2,SRD5A1,TBC1D9,THBS1,TLR2,ZNF280B	33
Cellular Growth and Proliferation, Lymphoid Tissue Structure and Development	Proliferation of lymphatic system cells	1.61e-05		-0.622	ACTL6A,AHNAK,C3,CBLB,CD36,CDH1,CLEC4D,CSF1R,CXCL12,CXCL8,DMTF1,DUSP14,DUSP5,ETS2,FCGR3A/FCGR3B,FKBP1B,GPR183,HRH1,ID3,IGF2,IL15RA,LTF,MEIS1,MRAS,NUP98,PBX1,PF4,SPRED1,THBS1,TLR2,TOB1,VCAM1,ZNF683	33
Cancer, Organismal Injury and Abnormalities, Reproductive System Disease	Prostate cancer	1.66e-05			C1R,C3,CALD1,CDH1,CFB,CFH,CHRM5,COL7A1,CTDSPL,ETS2,FCGR3A/FCGR3B,GPR183,HRH1,ID3,IGF2,LTF,MTUS1,NFYC,NME1,NMT2,SERPING1,SLC45A3,SRD5A1,TLR2	24
Cellular Function and Maintenance	Engulfment of phagocytes	1.67e-05	Increased	2.71	C3,C3AR1,CD36,CFH,CLEC6A,CSF1R,CTNND1,FCGR3A/FCGR3B,PF4,SCARB1,THBS1,TLR2	12
Connective Tissue Disorders, Organismal Injury and Abnormalities, Skeletal and Muscular Disorders	Non-traumatic arthropathy	1.83e-05			ACTL6A,ADAMTS2,APLP2,AQP9,C1R,C2,C3AR1,CACNA1D,CALD1,CD1A,CD36,CDH1,CFB,CHRM5,CLEC4D,CXCL12,CXCL8,FCGR3A/FCGR3B,GABRD,HRH1,HSPB8,KIR3DL2,LDLRAD3,LTF,NMT2,SLC1A4,THBS1,TLR2,TPM2,VCAM1,ZNF280B	31
Cellular Movement	Migration of tumor cell lines	1.94e-05		1.345	AHNAK,CACNA1D,CARD10,CBLB,CD36,CDH1,CSF1R,CST6,CTNND1,CXCL12,CXCL8,DUSP5,ECM1,EFEMP1,GALNT2,HIF1AN,IGF2,IGF2BP3,MCAM,MITF,MRAS,MTUS1,NME1,NRP2,OSGIN1,PRKCI,RALBP1,SEMA3C,THBS1,TLR2,VCAM1,ZMYND10	32
Cancer, Hematological Disease, Organismal Injury and Abnormalities	Hematopoietic neoplasm	2.02e-05		-1.314	ADGRB1,C1R,C3,CACNA1D,CALD1,CBLB,CD1A,CD36,CDH1,CHRM5,COL6A1,CSF1R,CXCL12,CXCL8,CYB5R2,DMTF1,DUSP5,ECI2,FCGR3A/FCGR3B,GABRD,GADD45G,ID3,IGF2,IKBIP,IRAK2,ITPR2,KPNB1,LDLRAD3,MCAM,MEIS1,MR1,NME1,NMT2,NUP98,OAS1,OSMR,PARD3,PBX1,PF4,PRKCI,SCARB1,SEMA3C,SLIT3,SYNE2,THBS1,TLR2,TOB1,VCAM1,ZNF280B	49
Cell Morphology	Polarity of hippocampal neurons	2.08e-05			ANK3,PARD3,PRKCI	3
Cellular Movement	Invasion of carcinoma cell lines	2.17e-05		-0.181	CARD10,CDH1,CFH,CTNND1,CXCL12,DOCK4,GALNT2,IGF2BP3,MITF,MTUS1,NME1,NRP2,PRKCI,ZMYND10	14
Cell Death and Survival	Cell death	2.26e-05		-0.759	ABCA3,ACVR2B,AFAP1L2,AKR1B1,ANK3,AQP9,ARID3B,ARMC10,ATOH1,BBS4,C3,C3AR1,CACNA1D,CADPS,CAMK2A,CBLB,CD300LB,CD36,CDH1,CFB,CFH,COL6A1,COX6B1,CSF1R,CSTB,CTNND1,CXCL12,CXCL8,CYGB,DUSP5,DYNC1H1,DYNLT1,EFEMP1,ETS2,EVA1C,FCGR3A/FCGR3B,FETUB,GABRD,GADD45G,GRK5,GUCY1A2,HIF1AN,HMGN5,HSPB8,HSPBAP1,ID3,IGF2,IL15RA,ING5,IRAK2,ITPR2,KIR3DL2,KPNB1,LHX2,LTF,MCAM,MITF,MTUS1,NME1,NOTCH4,NRP2,OAS1,OSBP2,OSGIN1,OSMR,…	97
Cancer, Hematological Disease, Organismal Injury and Abnormalities	Lymphohematopoietic cancer	2.56e-05		-1.236	ADGRB1,C1R,C3,CACNA1D,CALD1,CD1A,CD36,CDH1,CHRM5,COL6A1,CSF1R,CTNND1,CXCL12,CXCL8,CYB5R2,DMTF1,DUSP5,ECI2,FCGR3A/FCGR3B,GABRD,GADD45G,ID3,IGF2,IKBIP,IRAK2,ITPR2,KPNB1,LDLRAD3,MCAM,MEIS1,MR1,NME1,NMT2,NUP98,OAS1,OSMR,PARD3,PBX1,PF4,PRKCI,SCARB1,SLIT3,SYNE2,THBS1,TLR2,TOB1,VCAM1,ZNF280B	48
Cell-To-Cell Signaling and Interaction, Inflammatory Response	Response of phagocytes	2.63e-05	Increased	2.453	C3,C3AR1,CD36,CFH,CLEC6A,CSF1R,CXCL12,CXCL8,FCGR3A/FCGR3B,PF4,SCARB1,THBS1,TLR2,VCAM1	14
Cellular Movement	Cellular infiltration by blood cells	2.74e-05	Increased	2.554	AKR1B1,C2,C3,C3AR1,CBLB,CD36,CFB,CFH,CSF1R,CXCL12,CXCL8,IL15RA,LTF,MCAM,PF4,SERPING1,THBS1,TLR2,TRPM2,VCAM1	20
Cancer, Organismal Injury and Abnormalities	Pelvic tumor	2.81e-05			AKR1B1,C1R,C3,CALD1,CDH1,CFB,CFH,CHRM5,COL7A1,CPA3,CSF1R,CST6,CTDSPL,CXCL12,CXCL8,ETS2,FCGR3A/FCGR3B,GABRD,GPR183,HRH1,ID3,IGF2,IGF2BP3,KIF20B,LTF,MCAM,MTUS1,NFYC,NME1,NMT2,NOTCH4,PBX1,PF4,PRKCI,RALBP1,SEMA3C,SERPING1,SLC45A3,SLIT3,SRD5A1,THBS1,TLR2,TPM2	43
Cell-To-Cell Signaling and Interaction	Activation of cells	3.07e-05		0.269	AHNAK,ANK3,C3,C3AR1,CBLB,CD1A,CD300LB,CD36,CDH1,CDHR5,CFH,CSF1R,CTNND1,CXCL12,CXCL8,FCGR3A/FCGR3B,GABRD,GP5,HRH1,HSPB8,ID3,IGF2,IL15RA,LHX2,LTF,MR1,PBX1,PF4,PRKCI,SERPING1,SLIT3,SMURF1,THBS1,TLR2,TRIM32,TRPM2,VCAM1	37
Cellular Movement, Hematological System Development and Function, Immune Cell Trafficking, Inflammatory Response	Chemotaxis of antigen presenting cells	3.13e-05		1.713	C3AR1,CSF1R,CXCL12,GPR183,HRH1,NRP2,PF4,THBS1,TLR2,TRPM2,VCAM1	11
Cell-To-Cell Signaling and Interaction, Cellular Function and Maintenance, Inflammatory Response	Phagocytosis of phagocytes	3.13e-05	Increased	2.52	C3,C3AR1,CD36,CFH,CLEC6A,CSF1R,FCGR3A/FCGR3B,PF4,SCARB1,THBS1,TLR2	11
Cancer, Organismal Injury and Abnormalities, Reproductive System Disease	Breast or ovarian cancer	3.23e-05		-0.218	AKR1B1,C2,C3,C3AR1,CALD1,CDH1,CFB,CFH,CHRM5,COX6B1,CSF1R,CTDSPL,CTNND1,CXCL12,CXCL8,DNAH7,ECM1,ETS2,GPR183,HRH1,HSPB8,IGF2,IGF2BP3,LTF,MCAM,MTUS1,NFYC,NME1,NMT2,NOTCH4,NRP2,PBX1,PF4,PRKCI,RALBP1,SCAND1,SEMA3C,SERPING1,STX2,TBC1D9,THBS1,TPM2,TTC38,ZBTB40,ZNF280B	45
Cell-To-Cell Signaling and Interaction	Adhesion of bacteria	3.3e-05		-0.67	CFH,LTF,PIGR,THBS1	4
Cellular Assembly and Organization, Cellular Function and Maintenance	Microtubule dynamics	3.4e-05		1.346	ADGRB1,AHNAK,ANK3,ARHGAP32,ATXN10,BBS4,C3,CALD1,CAMK2A,CDH1,CEP162,CFAP53,CSF1R,CTNND1,CXCL12,CXCL8,DCX,DOCK4,DYNLT1,GRK5,KIF20B,KPNB1,LHX2,LTF,MAP7D3,MRAS,MTUS1,NME1,NRP2,NRXN1,PARD3,PARD6B,PARVB,PKP4,PRKCI,RGS6,SLC11A2,SLIT3,SMURF1,STX2,TACC2,TEX14,THBS1,ULK2	44
Cellular Function and Maintenance	Internalization of cells	3.42e-05		1.632	ADGRB1,C3,C3AR1,CD36,CFH,CLEC6A,CSF1R,CXCL12,ETS2,FCGR3A/FCGR3B,PF4,SCARB1,THBS1,TLR2	14
Cell-To-Cell Signaling and Interaction, Cellular Function and Maintenance, Hematological System Development and Function	Phagocytosis of myeloid cells	3.45e-05	Increased	2.393	C3,C3AR1,CD36,CFH,CLEC6A,CSF1R,FCGR3A/FCGR3B,PF4,SCARB1,THBS1,TLR2	11
Cancer, Hematological Disease, Organismal Injury and Abnormalities	Hematologic cancer	3.54e-05		-0.915	ADGRB1,C1R,C3,CACNA1D,CALD1,CD1A,CD36,CDH1,CHRM5,COL6A1,CSF1R,CXCL12,CXCL8,CYB5R2,DMTF1,DUSP5,ECI2,FCGR3A/FCGR3B,GABRD,GADD45G,ID3,IGF2,IKBIP,IRAK2,ITPR2,KPNB1,LDLRAD3,MCAM,MEIS1,MR1,NME1,NMT2,NUP98,OAS1,OSMR,PARD3,PBX1,PF4,PRKCI,SCARB1,SLIT3,SYNE2,THBS1,TLR2,TOB1,VCAM1,ZNF280B	47
Cancer, Organismal Injury and Abnormalities	Advanced malignant solid tumor	3.88e-05		-0.225	ANK3,C1R,C3,CALD1,CD36,CDH1,CFH,CSF1R,CTNND1,CXCL12,CXCL8,EFEMP1,FCGR3A/FCGR3B,GSTM3,IGF2,IL15RA,LTF,MCAM,MEIS1,MITF,MTUS1,NOTCH4,PRKCI,SEMA3C,SERPING1,SRD5A1,THBS1,TLR2,VCAM1	29
Cell-To-Cell Signaling and Interaction	Adhesion of Streptococcus pneumoniae	4.12e-05			CFH,PIGR,THBS1	3
Cell-To-Cell Signaling and Interaction, Inflammatory Response	Immune response of phagocytes	4.16e-05	Increased	2.73	C3,C3AR1,CD36,CFH,CLEC6A,CSF1R,CXCL8,FCGR3A/FCGR3B,PF4,SCARB1,THBS1,TLR2,VCAM1	13
Cancer, Organismal Injury and Abnormalities, Reproductive System Disease	Genital tract cancer	4.24e-05			C1R,C3,CALD1,CDH1,CFB,CFH,CHRM5,COL7A1,CPA3,CSF1R,CST6,CTDSPL,CXCL12,CXCL8,ETS2,FAM20C,FCGR3A/FCGR3B,GPR183,HRH1,ID3,IGF2,IGF2BP3,ING5,LTF,MCAM,MTUS1,NFYC,NME1,NMT2,NOTCH4,PBX1,PF4,PRKCI,RALBP1,SEMA3C,SERPING1,SLC45A3,SLIT3,SRD5A1,TLR2,TPM2	41
Cellular Movement	Cell movement of melanoma cell lines	4.25e-05		1.375	AHNAK,CD36,CDH1,CST6,CXCL12,MCAM,MITF,NME1,SIVA1,THBS1	10
Cancer, Organismal Injury and Abnormalities	Urogenital cancer	4.46e-05		-0.919	AQP9,C1R,C3,CALD1,CDH1,CFB,CFH,CHRM5,COL7A1,CPA3,CSF1R,CST6,CTDSPL,CXCL12,CXCL8,ETS2,FAM20C,FCGR3A/FCGR3B,GABRD,GPR183,HRH1,ID3,IGF2,IGF2BP3,ING5,KIF20B,LTF,MCAM,MITF,MTUS1,NFYC,NME1,NMT2,NOTCH4,PBX1,PF4,POU6F2,PRKCI,RALBP1,SEMA3C,SERPING1,SLC1A4,SLC45A3,SLIT3,SRD5A1,THBS1,TLR2,TPM2	48
Cancer, Organismal Injury and Abnormalities	Pelvic cancer	4.98e-05			C1R,C3,CALD1,CDH1,CFB,CFH,CHRM5,COL7A1,CPA3,CSF1R,CST6,CTDSPL,CXCL12,CXCL8,ETS2,FCGR3A/FCGR3B,GPR183,HRH1,ID3,IGF2,IGF2BP3,KIF20B,LTF,MCAM,MTUS1,NFYC,NME1,NMT2,NOTCH4,PBX1,PF4,PRKCI,RALBP1,SEMA3C,SERPING1,SLC45A3,SLIT3,SRD5A1,THBS1,TLR2,TPM2	41
Cancer, Organismal Injury and Abnormalities	Breast or pancreatic cancer	5.06e-05		-0.73	AKR1B1,C2,C3,C3AR1,CALD1,CDH1,CFB,CFH,CHRM5,COX6B1,CSF1R,CTDSPL,CTNND1,CXCL12,CXCL8,DNAH7,ECM1,ETS2,GABRD,GPR183,HRH1,HSPB8,IGF2,IGF2BP3,LTF,MCAM,MTUS1,NFYC,NME1,NMT2,NOTCH4,NRP2,PBX1,PF4,PRKCI,RALBP1,SCAND1,SEMA3C,SERPING1,SMYD2,STX2,TBC1D9,THBS1,TPM2,TTC38,ZBTB40,ZNF280B	47
Cell-To-Cell Signaling and Interaction	Binding of melanoma cell lines	5.38e-05	Increased	2.364	CDH1,CST6,LTF,NME1,SCARB1,THBS1	6
Cancer, Hematological Disease, Organismal Injury and Abnormalities	Lymphoid cancer	5.62e-05	Decreased	-2.219	ADGRB1,C1R,C3,CACNA1D,CALD1,CD1A,CD36,CDH1,CHRM5,COL6A1,CSF1R,CTNND1,CXCL12,CXCL8,CYB5R2,DMTF1,DUSP5,ECI2,FCGR3A/FCGR3B,GADD45G,ID3,IGF2,IKBIP,ITPR2,KPNB1,MCAM,MR1,NME1,NMT2,OAS1,OSMR,PARD3,PBX1,PRKCI,SCARB1,SLIT3,SYNE2,THBS1,TLR2,TOB1,VCAM1	41
Developmental Disorder, Hereditary Disorder, Immunological Disease, Organismal Injury and Abnormalities	Complement component deficiency	5.63e-05			C2,C3,CFB,SERPING1	4
Cardiovascular System Development and Function, Organismal Development	Angiogenesis	5.76e-05		0.108	ACVR2B,ADAMTS2,ADGRB1,AKR1B1,ATOH8,C3,C3AR1,CD36,CDH1,CFB,CSF1R,CXCL12,CXCL8,CYGB,CYP4F2,ECM1,HEG1,HIF1AN,HRH1,ID3,IGF2,KIF7,MCAM,MYOF,NOTCH4,NRP2,PBX1,PF4,SCARB1,SEMA3C,SLIT3,SPRED1,THBS1,TLR2,VCAM1,ZMYND10	36
Cell-To-Cell Signaling and Interaction	Aggregation of cells	5.95e-05		-0.175	AKR1B1,C3,CBLB,CD36,CDH1,CDHR5,CFH,CTNND1,CXCL12,DSC2,GP5,LTF,MRAS,MYL12B,THBS1,TLR2,VCAM1	17
Endocrine System Development and Function, Molecular Transport, Small Molecule Biochemistry	Abnormal quantity of hormone	6e-05			CADPS,CD36,ERFE,HIF1AN,IGF2,TLR2	6
Cancer, Organismal Injury and Abnormalities, Reproductive System Disease	Tumorigenesis of genital organ	6.16e-05			AKR1B1,C1R,C3,CALD1,CDH1,CFB,CFH,CHRM5,COL7A1,CPA3,CSF1R,CST6,CTDSPL,CTNND1,CXCL12,CXCL8,DCX,ETS2,FAM20C,FCGR3A/FCGR3B,GPR183,GUCY1A2,HRH1,ID3,IGF2,IGF2BP3,ING5,LTF,MCAM,MR1,MTUS1,NFYC,NME1,NMT2,NOTCH4,PBX1,PF4,PRKCI,RALBP1,SEMA3C,SERPING1,SLC45A3,SLIT3,SRD5A1,TLR2,TPM2	46
Cancer, Hematological Disease, Immunological Disease, Organismal Injury and Abnormalities	Lymphoproliferative malignancy	6.29e-05		-1.981	ADGRB1,C1R,C3,CACNA1D,CALD1,CD1A,CD36,CDH1,CHRM5,COL6A1,CSF1R,CXCL12,CXCL8,CYB5R2,DMTF1,DUSP5,ECI2,FCGR3A/FCGR3B,GADD45G,ID3,IKBIP,ITPR2,KPNB1,MCAM,MR1,NME1,NMT2,OAS1,OSMR,PARD3,PBX1,PRKCI,SCARB1,SLIT3,SYNE2,THBS1,TLR2,TOB1,VCAM1	39
Cardiovascular Disease, Organismal Injury and Abnormalities	Reperfusion injury of organ	6.68e-05	Increased	2.425	C3,C3AR1,CFB,SERPING1,THBS1,TLR2	6
Cancer, Organismal Injury and Abnormalities, Reproductive System Disease	Genital tumor	6.86e-05			AKR1B1,C1R,C3,CALD1,CDH1,CFB,CFH,CHRM5,COL7A1,CPA3,CSF1R,CST6,CTDSPL,CTNND1,CXCL12,CXCL8,DCX,ETS2,FAM20C,FCGR3A/FCGR3B,GPR183,GUCY1A2,HRH1,ID3,IGF2,IGF2BP3,ING5,LTF,MCAM,MR1,MTUS1,NFYC,NME1,NMT2,NOTCH4,PBX1,PF4,PRKCI,RALBP1,SEMA3C,SERPING1,SLC45A3,SLIT3,SRD5A1,TLR2,TPM2	46
Cardiovascular Disease	Reperfusion injury	6.98e-05	Increased	2.425	C3,C3AR1,CFB,GABRD,MR1,SERPING1,THBS1,TLR2	8
Cellular Movement, Hematological System Development and Function, Immune Cell Trafficking	Cellular infiltration by leukocytes	7.06e-05	Increased	2.758	C2,C3,C3AR1,CBLB,CD36,CFB,CFH,CSF1R,CXCL12,CXCL8,IL15RA,LTF,MCAM,PF4,SERPING1,THBS1,TLR2,TRPM2,VCAM1	19
Cardiovascular Disease, Cell Death and Survival, Connective Tissue Disorders, Hematological Disease, Hereditary Disorder, Organismal Injury and Abnormalities, Renal and Urological Disease	Familial hemolytic uremic syndrome	7.13e-05			C3,CFB,CFH	3
Cancer, Organismal Injury and Abnormalities	Genitourinary tumor	7.15e-05		-0.919	AKR1B1,AQP9,C1R,C3,CALD1,CDH1,CFB,CFH,CHRM5,COL7A1,CPA3,CSF1R,CST6,CTDSPL,CTNND1,CXCL12,CXCL8,DCX,ETS2,FAM20C,FCGR3A/FCGR3B,GABRD,GPR183,GUCY1A2,HRH1,ID3,IGF2,IGF2BP3,ING5,KIF20B,LTF,MCAM,MITF,MR1,MTUS1,NFYC,NME1,NMT2,NOTCH4,PBX1,PF4,POU6F2,PRKCI,RALBP1,SEMA3C,SERPING1,SLC1A4,SLC45A3,SLIT3,SRD5A1,THBS1,TLR2,TPM2	53
Gastrointestinal Disease, Organismal Injury and Abnormalities	Damage of large intestine	7.17e-05		0	CBLB,CFH,STX2,TLR2	4
Cancer, Hematological Disease, Organismal Injury and Abnormalities	Lymphocytic neoplasm	7.27e-05		-1.981	ADGRB1,C1R,C3,CACNA1D,CALD1,CD1A,CD36,CDH1,CHRM5,COL6A1,CSF1R,CXCL12,CXCL8,CYB5R2,DMTF1,DUSP5,ECI2,FCGR3A/FCGR3B,GADD45G,ID3,IGF2,IKBIP,ITPR2,KPNB1,MCAM,MR1,NME1,NMT2,OAS1,OSMR,PARD3,PBX1,PRKCI,SCARB1,SLIT3,SYNE2,THBS1,TLR2,TOB1,VCAM1	40
Tissue Development	Growth of epithelial tissue	7.35e-05		-0.028	ADAMTS2,ATOH1,ATOH8,C3,CD36,CDH1,CSF1R,CXCL12,CXCL8,CYGB,CYP4F2,ECM1,GADD45G,HIF1AN,HRH1,IGF2,LTF,MCAM,MYOF,NME1,NRP2,OSMR,PF4,SCARB1,SPRED1,THBS1,TLR2,TOB1	28
Cell-To-Cell Signaling and Interaction, Cellular Function and Maintenance, Hematological System Development and Function, Inflammatory Response	Phagocytosis of neutrophils	7.41e-05		1.455	C3,CD36,CFH,CLEC6A,FCGR3A/FCGR3B,THBS1	6
Hematological Disease, Immunological Disease	Lymphoproliferative disorder	7.87e-05		-1.981	ADGRB1,C1R,C3,CACNA1D,CALD1,CD1A,CD36,CDH1,CHRM5,COL6A1,CSF1R,CXCL12,CXCL8,CYB5R2,DMTF1,DUSP5,ECI2,FCGR3A/FCGR3B,GABRD,GADD45G,ID3,IKBIP,ITPR2,KPNB1,MCAM,MR1,NME1,NMT2,OAS1,OSMR,PARD3,PBX1,PRKCI,SCARB1,SLIT3,SYNE2,THBS1,TLR2,TOB1,VCAM1	40
Cardiovascular Disease, Organismal Injury and Abnormalities, Renal and Urological Disease	Reperfusion injury of kidney	8.11e-05	Increased	2.219	C3,C3AR1,CFB,THBS1,TLR2	5
Organismal Injury and Abnormalities, Tissue Morphology	Morphology of lesion	8.12e-05			C3,CAMK2A,CDH1,CTNND1,CXCL12,EFEMP1,ETS2,IGF2,OSMR,PANX2,PF4,PRKCI,SCARB1,SERPING1,SRR,THBS1,TLR2,VCAM1	18
Cell-To-Cell Signaling and Interaction, Hematological System Development and Function, Inflammatory Response	Binding of professional phagocytic cells	8.63e-05		1.987	ADGRB1,C3,CDH1,CFH,CXCL12,CXCL8,FCGR3A/FCGR3B,MITF,PF4,SCARB1,TLR2,VCAM1	12
Cancer, Organismal Injury and Abnormalities	Glandular intraepithelial neoplasm	9.17e-05			C1R,C3,CFB,CFH,COL7A1,FCGR3A/FCGR3B,LTF,SERPING1,SMYD2	9
Connective Tissue Disorders, Inflammatory Disease, Inflammatory Response, Organismal Injury and Abnormalities, Skeletal and Muscular Disorders	Inflammation of joint	9.22e-05		0.536	ACTL6A,ADAMTS2,APLP2,AQP9,C1R,C2,C3,C3AR1,CACNA1D,CALD1,CD1A,CD36,CDH1,CFB,CHRM5,CLEC4D,CSF1R,CXCL12,CXCL8,FCGR3A/FCGR3B,GABRD,HRH1,HSPB8,IL15RA,KIR3DL2,LDLRAD3,LTF,NMT2,SLC1A4,THBS1,TLR2,TPM2,VCAM1,ZNF280B	34
Cell-To-Cell Signaling and Interaction	Response of myeloid cells	9.73e-05	Increased	2.683	C3,C3AR1,CD36,CFH,CLEC6A,CSF1R,CXCL8,FCGR3A/FCGR3B,PF4,SCARB1,THBS1,TLR2,VCAM1	13
Cellular Function and Maintenance	Function of leukocytes	9.73e-05		0.243	AHNAK,C3,C3AR1,CBLB,CD36,CLEC6A,CSF1R,CXCL12,CXCL8,DMTF1,DUSP5,ECM1,GADD45G,ID3,IL15RA,IRAK2,PIGR,SPRED1,TLR2,TOB1,TRPM2	21
Cellular Movement, Hematological System Development and Function, Hypersensitivity Response, Immune Cell Trafficking	Migration of eosinophils	0.000107		0.655	C3,CXCL12,CXCL8,LTF,VCAM1	5
Organismal Survival	Morbidity or mortality	0.000107		-1.728	ABCA3,ACTL6A,ACVR2B,ANK3,APLP2,ARID3B,ATOH1,BBS4,C3,C3AR1,CADPS,CARD10,CBLB,CD36,CDH1,CFB,CFH,CLEC4D,CLEC6A,COL7A1,CPA3,CSF1R,CTNND1,CXCL12,CXCL8,CYGB,DMTF1,DYNC1H1,ECM1,EFEMP1,ETS2,FAM20C,FKBP1B,GABRD,HEG1,HRH1,HSPB8,ID3,IGF2,IGF2BP3,IL15RA,IRAK2,ITPR2,KIF7,LHX2,MITF,MTUS1,NOTCH4,NRP2,NRXN1,NUP98,PARD3,PBX1,PHF21A,PRKCI,SALL2,SCARB1,SCG5,SELENOP,SERPING1,SIVA1,SLC11A2,SMURF1,SPAG17,SPRED1,SYNE2,…	72
Cardiovascular Disease, Organismal Injury and Abnormalities, Renal and Urological Disease	Renal vascular disorder	0.000111		0	C2,CFB,THBS1,TLR2	4
Carbohydrate Metabolism, Lipid Metabolism, Molecular Transport, Small Molecule Biochemistry	Concentration of lipopolysaccharide	0.000113			C3,CFB,CFH	3
Carbohydrate Metabolism	Reduction of carbohydrate	0.000113			AKR1B1,C3,SELENOP	3
Cellular Movement, Hematological System Development and Function, Immune Cell Trafficking, Inflammatory Response	Cell movement of phagocytes	0.000116	Increased	3.784	AQP9,C2,C3,C3AR1,CD36,CDH1,CFB,CFH,CSF1R,CXCL12,CXCL8,GPR183,HRH1,IL15RA,MCAM,NRP2,PF4,PIGR,SERPING1,SLIT3,THBS1,TLR2,TRPM2,VCAM1	24
Cell Signaling, Molecular Transport, Small Molecule Biochemistry, Vitamin and Mineral Metabolism	Release of Ca2+	0.000117		1.395	C3,CD36,CSF1R,CXCL12,CXCL8,FKBP1B,GRK5,HRH1,ITPR2,SLIT3,TLR2,TRPM2	12
Cancer, Organismal Injury and Abnormalities	Breast or colorectal cancer	0.000121		0	AKR1B1,ANK3,C1R,C2,C3,C3AR1,CALD1,CD36,CDH1,CEP55,CFH,CHRM5,COL6A1,COX6B1,CSF1R,CTDSPL,CTNND1,CXCL12,CXCL8,DNAH7,DUSP5,ECM1,EFEMP1,ETS2,FCGR3A/FCGR3B,GPR183,HRH1,HSPB8,IGF2,LTF,MCAM,MEIS1,MTUS1,NFYC,NME1,NMT2,NRP2,NRXN1,PF4,PRKCI,RALBP1,SCAND1,SELENOP,SLIT3,SRD5A1,STX2,TBC1D9,THBS1,TLR2,TPM2,TTC38,VCAM1,ZBTB40,ZNF280B,ZNF420	55
Cellular Development, Cellular Growth and Proliferation, Lymphoid Tissue Structure and Development, Tissue Development	Proliferation of bone marrow cells	0.000133		-1.248	ACTL6A,CSF1R,CXCL12,CXCL8,MEIS1,MRAS,NUP98,PBX1,PF4	9
Cancer, Hematological Disease, Immunological Disease, Organismal Injury and Abnormalities	Lymphoma	0.000134		-1.987	C1R,C3,CALD1,CD1A,CD36,CDH1,CHRM5,COL6A1,CSF1R,CXCL12,CXCL8,CYB5R2,DMTF1,DUSP5,ECI2,FCGR3A/FCGR3B,GADD45G,ID3,IKBIP,ITPR2,KPNB1,MCAM,NME1,OAS1,OSMR,PBX1,PRKCI,SCARB1,SLIT3,THBS1,TLR2,TOB1,VCAM1	33
Cancer, Organismal Injury and Abnormalities	Metastasis	0.000134		0.276	ANK3,C1R,C3,CALD1,CD36,CDH1,CSF1R,CTNND1,CXCL12,CXCL8,DOCK4,EFEMP1,FCGR3A/FCGR3B,GSTM3,HRH1,ID3,IGF2,IL15RA,LTF,MCAM,MEIS1,MITF,MTUS1,NME1,NRP2,PARD3,PRKCI,RALBP1,SRD5A1,STX2,THBS1,TLR2,VCAM1	33
Infectious Diseases	Staphylococcal infection	0.000136			C3,CD36,FCGR3A/FCGR3B,TLR2	4
Inflammatory Disease, Neurological Disease, Skeletal and Muscular Disorders	Multiple Sclerosis	0.000146			C3,CBLB,CHRM5,CXCL12,FCGR3A/FCGR3B,GABRD,HRH1,MCAM,OAS1,SERPING1,SLC1A4,TLR2	12
Cellular Movement, Hematological System Development and Function, Immune Cell Trafficking	Cell movement of antigen presenting cells	0.000147	Increased	2.643	C3,C3AR1,CDH1,CSF1R,CXCL12,CXCL8,GPR183,HRH1,IL15RA,NRP2,PF4,PIGR,SERPING1,THBS1,TLR2,TRPM2,VCAM1	17
Cell Death and Survival	Apoptosis of tumor cell lines	0.000151		-0.995	ACVR2B,AKR1B1,ARID3B,ARMC10,BBS4,CDH1,CFH,COX6B1,CSF1R,CTNND1,CXCL12,CXCL8,CYGB,DYNC1H1,EFEMP1,ETS2,EVA1C,GADD45G,GRK5,HSPB8,ID3,IGF2,IL15RA,IRAK2,ITPR2,MITF,MTUS1,NME1,NOTCH4,OSGIN1,PBX1,PRKCI,SALL2,SCARB1,SIVA1,SMURF1,SNX33,THBS1,TLR2,TRIM32,TTC5,ULK2	42
Cell-To-Cell Signaling and Interaction, Hematological System Development and Function, Hematopoiesis	Binding of red blood cells	0.000156		1.413	CD36,CXCL8,FCGR3A/FCGR3B,LTF,SERPING1	5
Cell-To-Cell Signaling and Interaction	Binding of myeloid cells	0.000156		1.68	ADGRB1,C3,CFH,CXCL12,CXCL8,FCGR3A/FCGR3B,LTF,MITF,PF4,SCARB1,TLR2,VCAM1	12
Cellular Movement, Nervous System Development and Function	Guidance of axons	0.000157			ANK3,ATOH1,CSF1R,CXCL12,DCX,LHX2,NRP2,NRXN1,SEMA3C,SLIT3	10
Neurological Disease, Organismal Injury and Abnormalities, Psychological Disorders	Dementia	0.00016			APLP2,C1R,C3,CACNA1D,CAMK2A,CD36,CFB,CHRM5,CSF1R,CXCL12,CXCL8,DCX,ETS2,FCGR3A/FCGR3B,GABRD,HRH1,IGF2,NMT2,NOTCH4,NRXN1,OOEP,SCARB1,SCG5,SELENOP,ZNF280B	25
Cardiovascular System Development and Function	Development of vasculature	0.000163		0.108	ACVR2B,ADAMTS2,ADGRB1,AKR1B1,ARID3B,ATOH8,C3,C3AR1,CD36,CDH1,CFB,CFH,CSF1R,CXCL12,CXCL8,CYGB,CYP4F2,ECM1,HEG1,HIF1AN,HRH1,ID3,IGF2,KIF7,MCAM,MYOF,NOTCH4,NRP2,PBX1,PF4,SCARB1,SEMA3C,SLIT3,SPRED1,THBS1,TLR2,VCAM1,ZMYND10	38
Cellular Function and Maintenance	Endocytosis	0.000165		1.689	ADGRB1,C3,C3AR1,CD36,CDH1,CFH,CLEC6A,CSF1R,CTNND1,CXCL12,DCX,ETS2,FCGR3A/FCGR3B,LDLRAD3,OSBP2,PF4,RALBP1,SCARB1,SNX33,THBS1,TLR2	21
Hereditary Disorder, Ophthalmic Disease, Organismal Injury and Abnormalities	Age-related macular degeneration type 14	0.000166			C2,CFB	2
Cell Morphology, Cellular Assembly and Organization, Cellular Development, Cellular Function and Maintenance, Cellular Growth and Proliferation, Nervous System Development and Function, Organismal Development, Tissue Development	Branching of interneurons	0.000166			CXCL12,DCX	2
Cell Death and Survival, Hematological System Development and Function	Survival of peripheral blood monocytes	0.000166			NME1,PF4	2
Lipid Metabolism, Molecular Transport, Small Molecule Biochemistry	Uptake of myristic acid	0.000166			CD36,THBS1	2
Organismal Injury and Abnormalities	Edema	0.000166		0.618	C1R,C3,C3AR1,CHRM5,CXCL8,GABRD,HEG1,HRH1,KIF7,LHX2,LTF,MMACHC,PARD3,PBX1,SERPING1,SPAG17,SPRED1	17
Cell-To-Cell Signaling and Interaction, Cellular Movement, Hematological System Development and Function, Immune Cell Trafficking, Inflammatory Response	Recruitment of macrophages	0.000167		1.884	C3AR1,CD36,CSF1R,CXCL12,CXCL8,THBS1,TLR2,VCAM1	8
Cell-To-Cell Signaling and Interaction, Cellular Compromise, Tumor Morphology	Adhesion of melanoma cells	0.000168			CXCL8,MCAM,THBS1	3
Cell-To-Cell Signaling and Interaction	Recognition of bacteria	0.000168			CD36,SCARB1,TLR2	3
Cardiovascular Disease, Hematological Disease, Organismal Injury and Abnormalities, Renal and Urological Disease	Thrombosis of renal glomerulus	0.000168			C2,CFB,TLR2	3
Cell-To-Cell Signaling and Interaction	Binding of tumor cell lines	0.000169	Increased	2.365	ADGRB1,CD36,CDH1,CFH,CST6,CXCL12,CXCL8,EFEMP1,IGF2,LTF,NME1,PARD3,PARVB,SCARB1,SERPING1,THBS1,TLR2,VCAM1	18
Cellular Movement, Hematological System Development and Function, Immune Cell Trafficking, Inflammatory Response	Cell movement of dendritic cells	0.000172		1.3	C3,CDH1,CXCL12,CXCL8,GPR183,HRH1,NRP2,PF4,PIGR,TRPM2	10
Cell-To-Cell Signaling and Interaction	Binding of carcinoma cell lines	0.000174		0.077	CDH1,CFH,CXCL12,IGF2,THBS1,VCAM1	6
Cell-To-Cell Signaling and Interaction	Binding of bacteria	0.000176		-0.543	ADGRB1,CFH,LTF,PIGR,THBS1	5
Cellular Function and Maintenance	Function of blood cells	0.000176		0.243	AHNAK,AQP9,C3,C3AR1,CBLB,CD36,CLEC6A,CSF1R,CXCL12,CXCL8,DMTF1,DUSP5,ECM1,GADD45G,ID3,IL15RA,IRAK2,PIGR,SPRED1,TLR2,TOB1,TRPM2	22
Cancer, Organismal Injury and Abnormalities	Breast or ovarian carcinoma	0.000178		-0.218	C3,C3AR1,CALD1,CDH1,CFH,CTDSPL,CTNND1,CXCL12,CXCL8,DNAH7,ECM1,HSPB8,MCAM,NMT2,NOTCH4,NRP2,PBX1,PF4,PRKCI,RALBP1,SEMA3C,SERPING1,STX2,TBC1D9,THBS1	25
Cellular Development, Cellular Growth and Proliferation	Proliferation of blood cells	0.000183		-0.349	ACTL6A,AHNAK,C3,CBLB,CD36,CDH1,CLEC4D,CSF1R,CXCL12,CXCL8,DMTF1,DUSP14,DUSP5,ETS2,FCGR3A/FCGR3B,FKBP1B,GPR183,HRH1,ID3,IGF2,IL15RA,LTF,MEIS1,MRAS,NUP98,PBX1,PF4,THBS1,TLR2,TOB1,VCAM1,ZNF683	32
Hematological System Development and Function, Organismal Functions	Coagulation of blood	0.000186		-0.17	APLP2,C3,CD36,CXCL12,CXCL8,CYP4F2,GP5,PF4,STX2,THBS1,TLR2	11
Cell-To-Cell Signaling and Interaction, Hematological System Development and Function, Immune Cell Trafficking, Inflammatory Response	Binding of neutrophils	0.000187		1.614	C3,CFH,CXCL12,CXCL8,FCGR3A/FCGR3B,PF4,TLR2,VCAM1	8
Organismal Injury and Abnormalities	Benign lesion	0.000202	Decreased	-2.338	AHNAK,APLP2,ATOH1,C3,CACNA1D,CDH1,CFH,CHRM5,COL6A1,COL7A1,CSF1R,CTNND1,CXCL12,DCX,DMTF1,DUSP5,GUCY1A2,IGF2,MCAM,MR1,NOTCH4,PARD3,PBX1,PRKCI,SALL2,SELENOP,SEMA3C,SERPING1,SLIT3,SPAG17,SRD5A1,STX2,THBS1,TLR2,VCAM1,ZNF205	36
Cell-To-Cell Signaling and Interaction, Cellular Movement	Recruitment of myeloid cells	0.000213	Increased	2.243	C3,C3AR1,CD300LB,CD36,CSF1R,CXCL12,CXCL8,FCGR3A/FCGR3B,IL15RA,LTF,THBS1,TLR2,TRPM2,VCAM1	14
Cell Morphology, Cellular Assembly and Organization, Cellular Function and Maintenance	Formation of cellular protrusions	0.000217		1.723	ADGRB1,AHNAK,ANK3,ARHGAP32,ATXN10,BBS4,C3,CALD1,CAMK2A,CDH1,CEP162,CFAP53,CTNND1,CXCL12,CXCL8,DCX,DYNLT1,GRK5,KIF20B,MRAS,NME1,NRP2,NRXN1,PARD3,PARD6B,PARVB,PKP4,PRKCI,SLC11A2,SLIT3,STX2,TEX14,THBS1,ULK2	34
Cellular Movement, Hematological System Development and Function, Immune Cell Trafficking, Inflammatory Response	Cellular infiltration by phagocytes	0.000219	Increased	2.816	C2,C3,C3AR1,CD36,CFB,CFH,CSF1R,CXCL12,CXCL8,IL15RA,PF4,SERPING1,TLR2,TRPM2	14
Cell-To-Cell Signaling and Interaction, Hematological System Development and Function, Immune Cell Trafficking, Inflammatory Response	Activation of granulocytes	0.000221		1.277	C3,CFH,CXCL8,FCGR3A/FCGR3B,LTF,PF4,TLR2,VCAM1	8
Cellular Movement, Hematological System Development and Function, Immune Cell Trafficking, Inflammatory Response	Chemotaxis of phagocytes	0.000221	Increased	2.528	AQP9,C3,C3AR1,CSF1R,CXCL12,CXCL8,GPR183,HRH1,NRP2,PF4,PIGR,THBS1,TLR2,TRPM2,VCAM1	15
Cellular Function and Maintenance	Endocytosis by eukaryotic cells	0.000221	Increased	2.082	C3,C3AR1,CD36,CFH,CLEC6A,CSF1R,CTNND1,CXCL12,ETS2,FCGR3A/FCGR3B,OSBP2,PF4,SCARB1,THBS1,TLR2	15
Neurological Disease, Organismal Injury and Abnormalities, Psychological Disorders	Tauopathy	0.000223			APLP2,C1R,C3,CAMK2A,CD36,CFB,CHRM5,CXCL12,CXCL8,DCX,ETS2,FCGR3A/FCGR3B,GABRD,HRH1,IGF2,NMT2,NOTCH4,NRXN1,OOEP,SCARB1,SCG5,SELENOP,SLC1A4,ZNF280B	24
Cell-To-Cell Signaling and Interaction, Hematological System Development and Function, Immune Cell Trafficking, Inflammatory Response	Activation of neutrophils	0.00023		0.945	C3,CFH,CXCL8,FCGR3A/FCGR3B,LTF,PF4,TLR2	7
Cardiovascular Disease, Cell Death and Survival, Connective Tissue Disorders, Hematological Disease, Organismal Injury and Abnormalities, Renal and Urological Disease	Atypical hemolytic uremic syndrome	0.000238			C3,CFB,CFH	3
Cell-To-Cell Signaling and Interaction, Cellular Function and Maintenance, Inflammatory Response	Phagocytosis of connective tissue cells	0.000238			CD36,THBS1,TLR2	3
Carbohydrate Metabolism	Binding of polysaccharide	0.000243		0.391	CDH1,CXCL12,CXCL8,SERPING1,THBS1,TLR2	6
Cell Morphology	Polarity of cells	0.000243		0	ANK3,CDH1,CXCL12,DCX,PARD3,PRKCI	6
Cellular Movement	Invasion of cells	0.000244		0.583	AHNAK,ANK3,CARD10,CDH1,CFH,COL7A1,CST6,CTNND1,CXCL12,CXCL8,DOCK4,ECM1,EFEMP1,ETS2,GALNT2,IGF2,IGF2BP3,LTF,MCAM,MITF,MRAS,MTUS1,NME1,NRP2,PARD3,PARVB,PIGR,PRKCI,RALBP1,THBS1,TLR2,VCAM1,ZMYND10	33
Cell-To-Cell Signaling and Interaction, Hematological System Development and Function, Immune Cell Trafficking	Binding of granulocytes	0.00025		1.888	C3,CFH,CXCL12,CXCL8,FCGR3A/FCGR3B,LTF,PF4,TLR2,VCAM1	9
Cancer, Organismal Injury and Abnormalities	Carcinoma	0.000251		-0.576	AKR1B1,AQP9,C3,C3AR1,CADPS,CALD1,CD1A,CDH1,CDHR5,CFB,CFH,CPA3,CSF1R,CST6,CTDSPL,CTNND1,CXCL12,CXCL8,CYGB,DNAH7,ECM1,ETS2,FAM20C,GABRD,HSPB8,ID3,IGF2,IGF2BP3,IL15RA,ING5,KIF20B,LDLRAD3,LHX2,LTF,MCAM,MITF,MTUS1,NME1,NMT2,NOTCH4,NRP2,OAS1,OSMR,PBX1,PF4,PIGR,PRKCI,RALBP1,SCAND1,SCG5,SEMA3C,SERPING1,SLC1A4,SLC45A3,SLIT3,SMYD2,SPAG17,SRM,STX2,TBC1D9,THBS1,TLR2,TRIM32,ZMYND10,ZNF280B	65
Cancer, Hematological Disease, Immunological Disease, Organismal Injury and Abnormalities	Non-Hodgkin disease	0.000256			C1R,C3,CALD1,CD1A,CD36,CDH1,COL6A1,CSF1R,CXCL12,CXCL8,DMTF1,DUSP5,ECI2,FCGR3A/FCGR3B,ID3,IKBIP,ITPR2,MCAM,NME1,OAS1,OSMR,PBX1,PRKCI,SCARB1,TLR2,TOB1,VCAM1	27
Carbohydrate Metabolism	Quantity of carbohydrate	0.000258		0.701	ABCA3,ACVR2B,AQP9,C3,CD36,CFB,CFH,CPA3,CXCL12,CXCL8,CYP4F2,FKBP1B,GATM,HIF1AN,IGF2,ITPR2,LTF,MRAS,PBX1,SCARB1,SCG5,TLR2	22
Organismal Injury and Abnormalities, Tissue Morphology	Size of lesion	0.000265			C3,CAMK2A,CDH1,CXCL12,EFEMP1,ETS2,IGF2,OSMR,PANX2,PF4,PRKCI,SCARB1,SERPING1,SRR,TLR2,VCAM1	16
Cellular Function and Maintenance	Engulfment of cells	0.000265		1.685	ADGRB1,C3,C3AR1,CD36,CFH,CLEC6A,CSF1R,CTNND1,CXCL12,DCX,DOCK4,ETS2,FCGR3A/FCGR3B,OSBP2,PF4,PIGR,SCARB1,THBS1,TLR2	19
Connective Tissue Development and Function, Connective Tissue Disorders, Organ Morphology, Organismal Injury and Abnormalities, Skeletal and Muscular Disorders, Skeletal and Muscular System Development and Function, Tissue Development, Tissue Morphology	Abnormal morphology of xiphoid process	0.000276			ADAMTS2,EFEMP1,IGF2,KIF7	4
Cell-To-Cell Signaling and Interaction	Interaction of cancer cells	0.000276			CDH1,CXCL12,THBS1,VCAM1	4
Metabolic Disease	Amyloidosis	0.000285			APLP2,C1R,C3,CAMK2A,CD36,CFB,CHRM5,CXCL12,CXCL8,DCX,ETS2,FCGR3A/FCGR3B,GABRD,HRH1,IGF2,NMT2,NOTCH4,NRXN1,OOEP,OSMR,SCARB1,SCG5,SELENOP,ZNF280B	24
Ophthalmic Disease, Organismal Injury and Abnormalities	Macular degeneration	0.000285			C2,C3,CFB,CFH,EFEMP1,SERPING1	6
Cancer, Organismal Injury and Abnormalities, Reproductive System Disease	Prostatic intraepithelial neoplasia	0.000288			C1R,C3,CFB,CFH,COL7A1,FCGR3A/FCGR3B,LTF,SERPING1	8
Cardiovascular Disease, Organismal Injury and Abnormalities	Infarction	0.000292			C3,CACNA1D,CAMK2A,CD36,CSF1R,CXCL12,CXCL8,FCGR3A/FCGR3B,GUCY1A2,HRH1,OSMR,PANX2,SCARB1,SERPING1,SRR,TLR2	16
Cellular Function and Maintenance, Hematological System Development and Function	Function of myeloid cells	0.0003			C3AR1,CD36,CLEC6A,CSF1R,CXCL12,CXCL8,DUSP5,IRAK2,SPRED1,TLR2,TRPM2	11
Metabolic Disease, Neurological Disease, Organismal Injury and Abnormalities, Psychological Disorders	Alzheimer disease	0.000312			APLP2,C1R,C3,CAMK2A,CD36,CFB,CHRM5,CXCL12,CXCL8,DCX,ETS2,FCGR3A/FCGR3B,GABRD,HRH1,IGF2,NMT2,NOTCH4,NRXN1,OOEP,SCARB1,SCG5,SELENOP,ZNF280B	23
Cancer, Organismal Injury and Abnormalities	Adenocarcinoma	0.000313		-0.568	AQP9,C3,CALD1,CDH1,CFB,CFH,CPA3,CSF1R,CST6,CTDSPL,CTNND1,CXCL12,CXCL8,CYGB,ECM1,ETS2,GABRD,HSPB8,ID3,IGF2BP3,LDLRAD3,MCAM,MITF,NME1,NMT2,NOTCH4,OSMR,PBX1,PF4,PRKCI,RALBP1,SEMA3C,SERPING1,SLC1A4,SLIT3,SMYD2,SRM,STX2,THBS1,TLR2,ZNF280B	41
Inflammatory Disease	Chronic inflammatory disorder	0.000319		-1.123	ACTL6A,APLP2,AQP9,C1R,C2,C3,C3AR1,CACNA1D,CALD1,CD1A,CD36,CDH1,CFB,CFH,CHRM5,CLEC4D,CTNND1,CXCL12,CXCL8,FCGR3A/FCGR3B,GABRD,HRH1,HSPB8,KIR3DL2,LDLRAD3,LTF,MCAM,NMT2,THBS1,TLR2,TPM2,VCAM1,ZNF280B	33
Cell-To-Cell Signaling and Interaction	Aggregation of colorectal cancer cell lines	0.000324			CDH1,CTNND1,DSC2	3
Hematological Disease, Infectious Diseases, Neurological Disease, Organismal Injury and Abnormalities	Cerebral malaria	0.000324			C3,CD36,CFB	3
Cellular Movement, Hair and Skin Development and Function	Chemotaxis of skin cell lines	0.000324			CD36,CXCL8,THBS1	3
Gastrointestinal Disease, Organismal Injury and Abnormalities	Injury of colon	0.000324			CFH,STX2,TLR2	3
Cell-To-Cell Signaling and Interaction	Adhesion of carcinoma cell lines	0.000338		-0.319	CDH1,CFH,CXCL12,THBS1,VCAM1	5
Cancer, Organismal Injury and Abnormalities	Metastatic solid tumor	0.000349		-0.225	ANK3,C1R,C3,CALD1,CD36,CDH1,CSF1R,CTNND1,CXCL12,CXCL8,EFEMP1,FCGR3A/FCGR3B,GSTM3,IGF2,IL15RA,LTF,MEIS1,MITF,MTUS1,PRKCI,SRD5A1,THBS1,TLR2,VCAM1	24
Developmental Disorder, Organismal Injury and Abnormalities	Congenital malformation of genitourinary system	0.000387		0.64	ACVR2B,ADAMTS2,CALD1,CYGB,ETS2,FAM20C,GABRD,GADD45G,IGF2,KIF7,MMACHC,PBX1,PIGR,SALL2,SCG5,SEMA3C,SLIT3	17
Digestive System Development and Function, Organ Morphology, Organismal Development	Morphology of islets of Langerhans	0.000391			ACVR2B,CACNA1D,CADPS,IGF2,PBX1,PRKCI,SCG5,TLR2	8
Lipid Metabolism, Molecular Transport, Small Molecule Biochemistry	Concentration of fatty acid	0.000392	Decreased	-2.065	AKR1B1,C3,CD36,CXCL12,CXCL8,CYP4F2,ERFE,HRH1,IGF2,IL15RA,PRKCI,SCARB1,STARD10,TLR2	14
Cellular Movement	Invasion of tumor cell lines	0.000399		0.59	AHNAK,ANK3,CARD10,CDH1,CFH,CST6,CTNND1,CXCL12,CXCL8,DOCK4,ECM1,EFEMP1,ETS2,GALNT2,IGF2,IGF2BP3,MCAM,MITF,MTUS1,NME1,NRP2,PARD3,PARVB,PIGR,PRKCI,VCAM1,ZMYND10	27
Cell-To-Cell Signaling and Interaction, Cellular Function and Maintenance, Inflammatory Response	Phagocytosis of cells	0.000403	Increased	2.473	ADGRB1,C3,C3AR1,CD36,CFH,CLEC6A,CSF1R,ETS2,FCGR3A/FCGR3B,OSBP2,PF4,SCARB1,THBS1,TLR2	14
Ophthalmic Disease, Organismal Injury and Abnormalities	Age-related macular degeneration	0.000411			C2,C3,CFB,CFH,SERPING1	5
Cancer, Organismal Injury and Abnormalities	Abdominal neoplasm	0.000421	Decreased	-2.078	AKR1B1,ANK3,AQP9,ATOH1,C1R,C3,C3AR1,CACNA1D,CALD1,CD36,CDH1,CEP55,CFB,CFH,CHRM5,COL6A1,COL7A1,CPA3,CSF1R,CST6,CTDSPL,CTNND1,CXCL12,CXCL8,DCX,DUSP5,EFEMP1,ETS2,FCGR3A/FCGR3B,GABRD,GPR183,GUCY1A2,HRH1,ID3,IGF2,IGF2BP3,IL15RA,KIF20B,LDLRAD3,LTF,MCAM,MEIS1,MITF,MR1,MTUS1,NFYC,NME1,NMT2,NOTCH4,NRXN1,NUP98,OSMR,PARD3,PBX1,PF4,POU6F2,PRKCI,RALBP1,SELENOP,SEMA3C,SERPING1,SLC1A4,SLC45A3,SLIT3,SMYD2,SPAG17…	73
Cancer, Organismal Injury and Abnormalities, Reproductive System Disease	Mammary tumor	0.000422		-1.128	AKR1B1,C2,C3,C3AR1,CALD1,CDH1,CHRM5,COX6B1,CSF1R,CST6,CTDSPL,CTNND1,CXCL12,CXCL8,DMTF1,DNAH7,ECM1,ETS2,GPR183,HRH1,HSPB8,IGF2,LTF,MCAM,MTUS1,NFYC,NME1,NMT2,NOTCH4,NRP2,PARD3,PF4,PRKCI,RALBP1,SCAND1,STX2,TBC1D9,THBS1,TTC38,ZBTB40,ZNF280B	41
Cellular Movement, Nervous System Development and Function	Chemotaxis of nervous tissue cell lines	0.000427			CD36,CXCL12,TLR2	3
Cellular Assembly and Organization, Cellular Function and Maintenance	Organization of cytoskeleton	0.000429		1.531	ADGRB1,AHNAK,ANK3,ARHGAP32,ATXN10,BBS4,C3,CALD1,CAMK2A,CDH1,CEP162,CFAP53,CSF1R,CTNND1,CXCL12,CXCL8,DCX,DOCK4,DYNC1H1,DYNLT1,GRK5,KIF20B,KPNB1,LHX2,LTF,MAP7D3,MRAS,MTUS1,NME1,NRP2,NRXN1,PARD3,PARD6B,PARVB,PKP4,PRKCI,RALBP1,RGS6,SLC11A2,SLIT3,SMURF1,STX2,TACC2,TEX14,THBS1,ULK2	46
Lipid Metabolism, Molecular Transport, Small Molecule Biochemistry	Uptake of long chain fatty acid	0.000433		0.022	CD36,ERFE,SCARB1,THBS1	4
Cell-To-Cell Signaling and Interaction	Adhesion of breast cancer cell lines	0.000479		0.781	CDH1,CST6,CXCL12,NME1,PARVB,THBS1	6
Cellular Movement, Hematological System Development and Function, Immune Cell Trafficking	Cell movement of natural killer cells	0.000479		1.262	CXCL12,CXCL8,IL15RA,PF4,TLR2,VCAM1	6
Cancer, Organismal Injury and Abnormalities	Growth of tumor	0.000479		-0.029	ADGRB1,AFAP1L2,AKR1B1,C3AR1,CARD10,CD36,CDH1,CDHR5,CSF1R,CST6,CXCL12,CXCL8,CYGB,DOCK4,DSC2,EFEMP1,FCGR3A/FCGR3B,GALNT2,HIF1AN,ID3,IGF2,MCAM,NME1,PRKCI,SMYD2,TACC2,THBS1,TLR2,ULK2,ZMYND10	30
Cellular Function and Maintenance	Engulfment of antigen presenting cells	0.000481	Increased	2.581	C3,C3AR1,CD36,CLEC6A,CSF1R,CTNND1,SCARB1,THBS1,TLR2	9
Cardiovascular System Development and Function	Vascularization	0.000491		0.471	ADGRB1,C3,C3AR1,CFB,CXCL12,ID3,IGF2,LTF,NRP2,THBS1,TLR2,VCAM1	12
Cardiovascular Disease, Neurological Disease, Organismal Injury and Abnormalities	Acute phase ischemic stroke	0.000492			CD36,THBS1	2
Lipid Metabolism, Molecular Transport, Small Molecule Biochemistry	Delay in initiation of absorption of cholesterol	0.000492			CD36,SCARB1	2
Cellular Function and Maintenance	Engulfment of germ cells	0.000492			ADGRB1,SCARB1	2
Infectious Diseases, Organismal Injury and Abnormalities, Renal and Urological Disease	HIV associated nephropathy	0.000492			KLF15,TLR2	2
Developmental Disorder, Endocrine System Disorders, Gastrointestinal Disease, Organismal Injury and Abnormalities	Hypoplasia of exocrine region of pancreas	0.000492			PBX1,THBS1	2
Cellular Movement	Invasion by Streptococcus pneumoniae serotype 35A	0.000492			CFH,PIGR	2
Small Molecule Biochemistry	Metabolism of selenium	0.000492			SELENOP,SEPHS2	2
Embryonic Development, Organ Development, Organ Morphology, Organismal Development, Reproductive System Development and Function, Tissue Development	Morphogenesis of mammary alveolus	0.000492			CDH1,DSC2	2
Cell Morphology, Embryonic Development	Morphology of embryonic stem cell lines	0.000492			CDH1,SMYD2	2
Cell-To-Cell Signaling and Interaction, Cellular Function and Maintenance, Connective Tissue Development and Function, Inflammatory Response	Phagocytosis of fibroblasts	0.000492			CD36,THBS1	2
Cellular Function and Maintenance, Hematological System Development and Function, Hematopoiesis	Retention of hematopoietic progenitor cells	0.000492			CSF1R,CXCL12	2
Carbohydrate Metabolism, Lipid Metabolism, Molecular Transport, Small Molecule Biochemistry	Uptake of phosphatidylcholine	0.000492			ABCA3,SCARB1	2
Cellular Movement, Hematological System Development and Function, Immune Cell Trafficking, Inflammatory Response	Infiltration by neutrophils	0.0005	Increased	2.59	C2,C3,C3AR1,CD36,CFB,CFH,CXCL8,PF4,TLR2,TRPM2	10
Immunological Disease	Hypersensitive reaction	0.000504		1.342	AHNAK,C3,C3AR1,CD1A,CFH,CHRM5,CLEC4D,CST6,CXCL8,ECM1,GADD45G,HRH1,MCAM,OSMR,RAB11B,SRM,SYNE2,TLR2	18
Renal and Urological System Development and Function	Morphology of urinary system	0.000512			ACVR2B,AKR1B1,CD300LB,CD36,CFB,CFH,CLEC6A,DMTF1,EFEMP1,IGF2,MMACHC,PBX1,SALL2,SLIT3,THBS1	15
Organismal Injury and Abnormalities, Renal and Urological Disease	Injury of kidney	0.000522	Increased	2.185	C3,C3AR1,CAMK2A,CFB,CFH,SCARB1,THBS1,TLR2	8
Hematological System Development and Function, Tissue Development	Accumulation of myeloid cells	0.000538		1.18	C3,CD300LB,CXCL12,CXCL8,ETS2,FCGR3A/FCGR3B,SERPING1,THBS1,TLR2,VCAM1	10
Cellular Development, Cellular Growth and Proliferation	Proliferation of myeloid cells	0.000538		-0.912	ACTL6A,CSF1R,CXCL12,CXCL8,MEIS1,MRAS,NUP98,PBX1,PF4,TLR2	10
Cellular Development, Cellular Growth and Proliferation	Development of breast cancer cell lines	0.00055			CDH1,MCAM,TLR2	3
Metabolic Disease	Glucose metabolism disorder	0.000559		0.101	AKR1B1,C2,C3,C3AR1,CACNA1D,CBLB,CD36,CFB,CFH,CHRM5,CLEC6A,COL6A1,COL7A1,CXCL8,CYP4F2,ECM1,FCGR3A/FCGR3B,FKBP1B,GABRD,GUCY1A2,HRH1,IGF2,IL15RA,ITPR2,KLF15,MR1,NMT2,NOTCH4,OAS1,OSMR,PBX1,PRKCI,SCARB1,SCG5,SERPING1,THBS1,TLR2,VCAM1	38
Digestive System Development and Function, Organ Morphology, Organismal Development	Morphology of pancreas	0.000566			ACVR2B,CACNA1D,CADPS,IGF2,PBX1,PRKCI,SCG5,THBS1,TLR2	9
Dermatological Diseases and Conditions, Immunological Disease, Organismal Injury and Abnormalities	Angioedema	0.000568			C1R,CHRM5,HRH1,SERPING1	4
Cell Death and Survival	Cell viability of bone marrow cells	0.000568		0.22	ACTL6A,CXCL12,CXCL8,PF4	4
Cellular Compromise	Respiratory burst	0.000587		1.709	C3,CLEC4D,CXCL8,LTF,PF4,VCAM1	6
Neurological Disease, Psychological Disorders	Pervasive developmental disorder	0.00062			C3,CADPS,CHRM5,CORO2A,DCX,FCGR3A/FCGR3B,GABRD,HRH1,NRP2,SEMA3C	10
Organismal Survival	Organismal death	0.000627		-1.686	ABCA3,ACTL6A,ACVR2B,ANK3,APLP2,ARID3B,ATOH1,BBS4,C3,C3AR1,CADPS,CARD10,CBLB,CD36,CDH1,CFB,CFH,COL7A1,CPA3,CSF1R,CTNND1,CXCL12,CXCL8,CYGB,DMTF1,DYNC1H1,ECM1,EFEMP1,ETS2,FAM20C,FKBP1B,GABRD,HEG1,HRH1,HSPB8,ID3,IGF2,IGF2BP3,IL15RA,ITPR2,KIF7,LHX2,MITF,MTUS1,NOTCH4,NRP2,NRXN1,NUP98,PARD3,PBX1,PHF21A,PRKCI,SALL2,SCARB1,SCG5,SELENOP,SERPING1,SIVA1,SLC11A2,SMURF1,SPAG17,SPRED1,SYNE2,THBS1,TLR2,ULK2,VCAM…	68
Lipid Metabolism, Molecular Transport, Small Molecule Biochemistry	Uptake of fatty acid	0.000628		0.223	C3,CD36,ERFE,IL15RA,SCARB1,THBS1	6
Free Radical Scavenging	Metabolism of reactive oxygen species	0.000637		1.103	AKR1B1,C3,C3AR1,CD36,CFB,CFH,CSTB,CXCL12,CXCL8,CYGB,FCGR3A/FCGR3B,LTF,MTUS1,RGS6,SCARB1,SELENOP,TLR2,TRPM2,ULK2,VCAM1	20
Carbohydrate Metabolism, Molecular Transport, Small Molecule Biochemistry	Concentration of D-glucose	0.000648		0.467	ACVR2B,AQP9,C3,CD36,CYP4F2,FKBP1B,GATM,HIF1AN,IGF2,ITPR2,LTF,PBX1,SCARB1,SCG5,TLR2	15
Cancer, Organismal Injury and Abnormalities	Abdominal cancer	0.000653		-1.276	ANK3,AQP9,C1R,C3,C3AR1,CALD1,CD36,CDH1,CEP55,CFB,CFH,CHRM5,COL6A1,COL7A1,CPA3,CSF1R,CST6,CTDSPL,CTNND1,CXCL12,CXCL8,DUSP5,EFEMP1,ETS2,FCGR3A/FCGR3B,GABRD,GPR183,HRH1,ID3,IGF2,IGF2BP3,IL15RA,KIF20B,LDLRAD3,LTF,MCAM,MEIS1,MITF,MTUS1,NFYC,NME1,NMT2,NOTCH4,NRXN1,NUP98,OSMR,PBX1,PF4,POU6F2,PRKCI,RALBP1,SELENOP,SEMA3C,SERPING1,SLC1A4,SLC45A3,SLIT3,SMYD2,SPAG17,SRD5A1,THBS1,TLR2,TPM2,TTC38,VCAM1,ZNF420	66
Cardiovascular System Development and Function, Cell-To-Cell Signaling and Interaction	Adhesion of vascular endothelial cells	0.000662		-0.192	CD36,CXCL12,CXCL8,MCAM,PF4,THBS1,VCAM1	7
Hematological System Development and Function, Tissue Morphology	Quantity of mononuclear leukocytes	0.000664		0.343	C3,C3AR1,CBLB,CD36,CLEC4D,CSF1R,CXCL12,CXCL8,DMTF1,DUSP5,ETS2,GADD45G,GPR183,HRH1,ID3,IGF2,IL15RA,MR1,NOTCH4,NUP98,PBX1,PIGR,POLR3E,THBS1,TLR2,TOB1,VCAM1	27
Cell-To-Cell Signaling and Interaction, Cellular Assembly and Organization	Cell-cell adhesion	0.000668		-0.321	CDH1,CDH10,CRISP2,CTNND1,CXCL12,CXCL8,MCAM,NME1,NRXN1,PARD3,VCAM1	11
Organ Morphology, Renal and Urological System Development and Function	Morphology of kidney	0.000671			ACVR2B,AKR1B1,CD300LB,CD36,CFB,CFH,CLEC6A,EFEMP1,IGF2,MMACHC,PBX1,SALL2,SLIT3,THBS1	14
Cellular Assembly and Organization	Formation of plasma membrane	0.000677		-0.081	ADGRB1,ATOH1,CDH1,CHRM5,CSF1R,CXCL8,DOCK4,NRXN1,PARD3,PARD6B,PRKCI,THBS1,TLR2	13
Cell-To-Cell Signaling and Interaction, Hematological System Development and Function, Immune Cell Trafficking, Inflammatory Response	Activation of phagocytes	0.000684		1.43	C3,CD300LB,CD36,CFH,CSF1R,CXCL8,FCGR3A/FCGR3B,HRH1,HSPB8,LTF,PF4,PRKCI,SERPING1,THBS1,TLR2,TRPM2	16
Cancer, Cellular Movement, Organismal Injury and Abnormalities, Tumor Morphology	Invasion of melanoma cells	0.000694			CDH1,CXCL12,MCAM	3
Cardiovascular System Development and Function, Cellular Movement	Migration of endothelial cells	0.000694		-0.11	ADGRB1,ATOH8,CD36,CXCL12,CXCL8,HRH1,ID3,IGF2,MCAM,NRP2,PF4,SCARB1,SLIT3,THBS1,VCAM1	15
Immunological Disease	Immunodeficiency	0.000717			C2,C3,CFB,CFH,CSF1R,FCGR3A/FCGR3B,HRH1,LTF,OAS1,SERPING1,TLR2,ZNF280B	12
Cellular Movement	Positioning of cells	0.000731			ATOH1,DCX,GPR183,NRP2	4
Cell-To-Cell Signaling and Interaction, Hematological System Development and Function, Inflammatory Response, Organismal Functions	Activation of blood platelets	0.000773		-0.17	CD36,CXCL12,CXCL8,GP5,PF4,THBS1,TLR2	7
Cellular Movement	Cell movement of hepatoma cell lines	0.000773		-0.637	CXCL12,CXCL8,GALNT2,IGF2,IGF2BP3,NME1,VCAM1	7
Cell-To-Cell Signaling and Interaction, Hematological System Development and Function, Immune Cell Trafficking, Inflammatory Response	Activation of leukocytes	0.000776		1.094	AHNAK,C3,C3AR1,CBLB,CD1A,CD300LB,CD36,CFH,CSF1R,CXCL12,CXCL8,FCGR3A/FCGR3B,HRH1,HSPB8,IL15RA,LTF,MR1,PBX1,PF4,PRKCI,SERPING1,THBS1,TLR2,TRPM2,VCAM1	25
Cell-To-Cell Signaling and Interaction, Cellular Movement, Hematological System Development and Function, Immune Cell Trafficking	Recruitment of granulocytes	0.000779		1.994	C3,C3AR1,CD300LB,CXCL8,FCGR3A/FCGR3B,IL15RA,LTF,THBS1,TLR2,TRPM2,VCAM1	11
Hematological System Development and Function, Lymphoid Tissue Structure and Development, Tissue Morphology	Quantity of lymphocytes	0.000794		0.246	C3,C3AR1,CBLB,CD36,CLEC4D,CSF1R,CXCL12,DMTF1,DUSP5,ETS2,GADD45G,GPR183,HRH1,ID3,IGF2,IL15RA,MR1,NOTCH4,NUP98,PBX1,PIGR,POLR3E,THBS1,TLR2,TOB1,VCAM1	26
Cellular Movement, Hematological System Development and Function, Immune Cell Trafficking, Inflammatory Response	Chemotaxis of dendritic cells	0.00081		0.608	CXCL12,GPR183,HRH1,NRP2,PF4,TRPM2	6
Cardiovascular System Development and Function, Organismal Development, Visual System Development and Function	Neovascularization of eye	0.000813		0.896	ADGRB1,C3,C3AR1,CFB,IGF2,THBS1,VCAM1	7
Cell-To-Cell Signaling and Interaction, Cellular Function and Maintenance, Hematological System Development and Function, Inflammatory Response	Phagocytosis by macrophages	0.000816	Increased	2.182	C3,C3AR1,CD36,CLEC6A,CSF1R,SCARB1,THBS1,TLR2	8
Respiratory Disease	Respiratory failure	0.000816		-1.478	ABCA3,ATOH1,CADPS,GABRD,IGF2,LTF,SPAG17,SYNE2	8
Cell-To-Cell Signaling and Interaction	Binding of bone marrow cell lines	0.000823		1.154	CXCL12,MRAS,THBS1,VCAM1	4
Cell-To-Cell Signaling and Interaction, Cellular Assembly and Organization	Formation of intercellular junctions	0.000833		-0.539	ADGRB1,ATOH1,CDH1,CHRM5,CSF1R,CXCL8,NRXN1,PARD3,PARD6B,PKP4,PRKCI,THBS1,TLR2	13
Connective Tissue Disorders, Inflammatory Disease, Organismal Injury and Abnormalities, Skeletal and Muscular Disorders	Rheumatic Disease	0.000841		-0.026	ACTL6A,ADAMTS2,APLP2,AQP9,C1R,C2,C3,C3AR1,CACNA1D,CALD1,CD1A,CD36,CDH1,CFB,CHRM5,CLEC4D,CSF1R,CXCL12,CXCL8,FCGR3A/FCGR3B,GABRD,HRH1,HSPB8,IL15RA,KIR3DL2,LDLRAD3,LTF,NMT2,OAS1,SLC1A4,THBS1,TLR2,TPM2,VCAM1,ZNF280B	35
Cellular Movement	Cell movement of blood cells	0.000854	Increased	2.518	AKR1B1,AQP9,C2,C3,C3AR1,CBLB,CD300LB,CD36,CDH1,CFB,CFH,CSF1R,CXCL12,CXCL8,FCGR3A/FCGR3B,GPR183,HRH1,IGF2,IL15RA,LTF,MCAM,NOTCH4,NRP2,PF4,PIGR,SERPING1,SLIT3,THBS1,TLR2,TRPM2,VCAM1	31
Cellular Movement	Mobilization of stem cells	0.000859			CXCL12,CXCL8,PF4	3
Cell-To-Cell Signaling and Interaction	Adhesion of myeloid cells	0.000865		1.266	C3,CFH,CXCL12,CXCL8,LTF,MITF,PF4,TLR2,VCAM1	9
Cell Morphology	Morphology of blood cells	0.000889			ACVR2B,C3,CBLB,CD36,CPA3,CSF1R,CXCL8,ETS2,ID3,MITF,PBX1,PIGR,SCARB1,SLC11A2,THBS1,TLR2,TRPM2,VCAM1	18
Cellular Movement, Hematological System Development and Function, Immune Cell Trafficking, Inflammatory Response	Cell movement of neutrophils	0.000895	Increased	2.81	AQP9,C2,C3,C3AR1,CD36,CFB,CFH,CXCL12,CXCL8,PF4,PIGR,TLR2,TRPM2,VCAM1	14
Neurological Disease	Memory deficits	0.0009		0.447	C3,FKBP1B,IGF2,IL15RA,TRPM2	5
Cellular Movement, Hematological System Development and Function, Immune Cell Trafficking	Cell movement of leukocytes	0.000904	Increased	2.825	AQP9,C2,C3,C3AR1,CBLB,CD36,CDH1,CFB,CFH,CSF1R,CXCL12,CXCL8,FCGR3A/FCGR3B,GPR183,HRH1,IL15RA,LTF,MCAM,NOTCH4,NRP2,PF4,PIGR,SERPING1,SLIT3,THBS1,TLR2,TRPM2,VCAM1	28
Cancer, Organismal Injury and Abnormalities, Reproductive System Disease	Breast cancer	0.000911		-0.218	AKR1B1,C2,C3,C3AR1,CALD1,CDH1,CHRM5,COX6B1,CSF1R,CTDSPL,CTNND1,CXCL12,CXCL8,DNAH7,ECM1,ETS2,GPR183,HRH1,HSPB8,IGF2,LTF,MTUS1,NFYC,NME1,NMT2,NRP2,PF4,PRKCI,RALBP1,SCAND1,STX2,TBC1D9,THBS1,TTC38,ZBTB40,ZNF280B	36
Cellular Compromise	Injury of cells	0.000916		1.067	C3,CAMK2A,CFH,IGF2,STX2,THBS1	6
Protein Synthesis	Quantity of cytokine	0.00092		1.135	C3,C3AR1,CD36,CLEC4D,GATM,GPR183,HRH1,HSPB8,IRAK2,SCARB1,TLR2,TRPM2	12
Cellular Movement, Hematological System Development and Function	Mobilization of myeloid cells	0.000923		-0.064	C3AR1,CXCL12,CXCL8,PF4	4
Cellular Development, Cellular Growth and Proliferation, Organ Development, Skeletal and Muscular System Development and Function, Tissue Development	Proliferation of muscle cells	0.000939		-0.873	AKR1B1,ATOH8,C3AR1,CAMK2A,CXCL12,CXCL8,GRK5,ID3,IGF2,MEIS1,RALBP1,SCARB1,SYNE2,THBS1,TLR2,TRIM32	16
Cell-To-Cell Signaling and Interaction, Cellular Movement, Hematological System Development and Function, Immune Cell Trafficking, Inflammatory Response	Recruitment of phagocytes	0.000971	Increased	2.246	C3AR1,CD300LB,CD36,CSF1R,CXCL12,CXCL8,FCGR3A/FCGR3B,LTF,THBS1,TLR2,TRPM2,VCAM1	12
Cardiovascular System Development and Function, Cellular Movement	Chemotaxis of endothelial cells	0.000973		-0.507	CD36,CXCL12,CXCL8,IGF2,THBS1	5
Cancer, Cell-To-Cell Signaling and Interaction, Organismal Injury and Abnormalities	Activation of melanoma cells	0.000976			CXCL8,SLIT3	2
Cell-To-Cell Signaling and Interaction	Activation of skin cancer cell lines	0.000976			CDH1,THBS1	2
Respiratory Disease	Acute respiratory failure	0.000976			ABCA3,LTF	2
Cardiovascular System Development and Function, Cell-To-Cell Signaling and Interaction	Adhesion of endothelial progenitor cells	0.000976			CXCL12,MCAM	2
Cardiovascular System Development and Function, Cellular Movement	Chemotaxis of microvascular endothelial cells	0.000976			CXCL8,THBS1	2
Inflammatory Disease, Inflammatory Response, Organismal Injury and Abnormalities, Renal and Urological Disease	Inflammation of renal glomerulus	0.000976			CFB,TLR2	2
Cardiovascular Disease, Neurological Disease, Organismal Injury and Abnormalities	Recovery stage ischemic stroke	0.000976			CD36,THBS1	2
Carbohydrate Metabolism, Small Molecule Biochemistry	Reduction of D-glucose	0.000976			AKR1B1,C3	2
Immunological Disease	Abnormal quantity of cytokine	0.000992			C3,C3AR1,CD36,IRAK2,MCAM,TLR2,TRPM2	7
Dermatological Diseases and Conditions, Organismal Injury and Abnormalities	Chronic skin disorder	0.001			C3,CHRM5,CST6,CSTB,FCGR3A/FCGR3B,HRH1,KPNB1,MCAM,SRM	9
Cellular Function and Maintenance	Ion homeostasis of cells	0.00101		1.053	AKR1B1,APLP2,BDH2,C3,C3AR1,CACNA1D,CD36,CHRM5,CXCL12,CXCL8,ERFE,ETS2,FCGR3A/FCGR3B,FKBP1B,GPR183,HRH1,IGF2,PF4,SLC11A2,TLR2,TMTC2,TRPM2	22
Cell-To-Cell Signaling and Interaction, Hematological System Development and Function	Activation of blood cells	0.00102		0.85	AHNAK,C3,C3AR1,CBLB,CD1A,CD300LB,CD36,CFH,CSF1R,CXCL12,CXCL8,FCGR3A/FCGR3B,GP5,HRH1,HSPB8,IL15RA,LTF,MR1,PBX1,PF4,PRKCI,SERPING1,THBS1,TLR2,TRPM2,VCAM1	26
Cell Cycle, Connective Tissue Development and Function	Cell cycle progression of fibroblast cell lines	0.00103			ACTL6A,AHNAK,ARHGAP32,DMTF1,ID3,MITF	6
Visual System Development and Function	Homeostasis of retina	0.00103			BBS4,LTF,PIGR,SLC28A3	4
Infectious Diseases	Infection by cytomegalovirus	0.00103			C3,CXCL8,FCGR3A/FCGR3B,MR1	4
Dermatological Diseases and Conditions, Immunological Disease, Organismal Injury and Abnormalities	Pemphigus	0.00103			CDH1,CHRM5,CXCL8,HRH1	4
Organismal Injury and Abnormalities, Renal and Urological Disease	Injury of renal tubule	0.00105			C3,CFB,TLR2	3
Cellular Function and Maintenance, Cellular Movement	Localization of cells	0.00105		0.762	ATOH1,C3,CXCL12,IGF2,TLR2	5
Cell Death and Survival	Cell survival	0.00105		-0.36	ABCA3,ACTL6A,ACVR2B,AFAP1L2,C3,CARD10,CBLB,CDH1,CFH,CSF1R,CTDSPL,CXCL12,CXCL8,DUSP14,DUSP5,ECM1,ETS2,FCGR3A/FCGR3B,FKBP1B,HEATR1,HSPB8,HSPBAP1,IGF2,IGF2BP3,KIFC2,LTF,MCAM,MITF,MRAS,NME1,PBX1,PF4,POLK,POLR1D,PRKCI,RPL38,SCARB1,SCG5,SLC11A2,TBC1D9,THBS1,TLR2,TRPM2,VCAM1	44
Cardiovascular System Development and Function, Cell-To-Cell Signaling and Interaction	Binding of endothelial cells	0.00106		0.537	C3,CD36,CXCL12,CXCL8,MCAM,PF4,PIGR,SERPING1,THBS1,VCAM1	10
Cancer, Organismal Injury and Abnormalities	Tumorigenesis of malignant tumor	0.00107		-1.187	ANK3,AQP9,C3,C3AR1,CALD1,CDH1,CFH,CSF1R,CTDSPL,CTNND1,CXCL8,CYGB,DMTF1,ETS2,FCGR3A/FCGR3B,GABRD,GSTM3,IGF2,MCAM,MITF,NME1,NOTCH4,OSMR,PBX1,PF4,PRKCI,RALBP1,SEMA3C,SERPING1,SLC1A4,SRM,STX2,THBS1,TLR2,TRPM2	35
Cardiovascular System Development and Function	Neovascularization	0.00111		0.127	ADGRB1,C3,C3AR1,CFB,CXCL12,IGF2,LTF,THBS1,VCAM1	9
Psychological Disorders	Depressive disorder	0.00112			CACNA1D,CAMK2A,CHRM5,CXCL8,GABRD,GATM,HRH1,ITPR2,PF4,PRKCI,SLC1A4,SMURF1,TOB1	13
Developmental Disorder, Neurological Disease, Psychological Disorders	Autism	0.00116			C3,CHRM5,FCGR3A/FCGR3B,GABRD,HRH1,NRP2	6
Cell-To-Cell Signaling and Interaction, Hematological System Development and Function, Inflammatory Response	Binding of blood platelets	0.00116		0.876	C3,CD36,CXCL12,GP5,THBS1,TLR2	6
Lymphoid Tissue Structure and Development, Tissue Morphology	Quantity of lymphatic system cells	0.00117		-0.123	C3,C3AR1,CBLB,CD36,CLEC4D,CSF1R,CXCL12,DMTF1,DUSP5,ETS2,GADD45G,GPR183,HRH1,ID3,IGF2,IL15RA,MR1,NOTCH4,NUP98,PBX1,PIGR,POLR3E,SPRED1,THBS1,TLR2,TOB1,VCAM1	27
Protein Synthesis	Quantity of interleukin	0.00118		1.067	C3,C3AR1,CLEC4D,HSPB8,IRAK2,SCARB1,TLR2,TRPM2	8
Cellular Movement, Hematological System Development and Function, Immune Cell Trafficking, Inflammatory Response	Chemotaxis of macrophages	0.0012		1.698	C3AR1,CSF1R,CXCL12,PF4,THBS1,TLR2,VCAM1	7
Cellular Development, Cellular Growth and Proliferation, Lymphoid Tissue Structure and Development	Proliferation of lymphoid cells	0.0012		-0.241	AHNAK,C3,CBLB,CD36,CDH1,CLEC4D,CXCL12,DMTF1,DUSP14,DUSP5,ETS2,FCGR3A/FCGR3B,FKBP1B,GPR183,HRH1,ID3,IGF2,IL15RA,LTF,NUP98,SPRED1,THBS1,TLR2,TOB1,VCAM1,ZNF683	26
Cancer, Cellular Development, Cellular Growth and Proliferation, Organismal Injury and Abnormalities, Tumor Morphology	Proliferation of carcinoma cells	0.00122		0	AKR1B1,CDHR5,ID3,THBS1,ZMYND10	5
Cellular Movement	Cell movement of squamous cell carcinoma cell lines	0.00123		1	CDH1,CXCL12,GALNT2,HIF1AN,NME1,PRKCI	6
Cancer, Organismal Injury and Abnormalities	Blue round small cell tumor	0.00124			ATOH1,C3,DCX,FCGR3A/FCGR3B,IGF2,NME1,NOTCH4,PRKCI,THBS1,TRPM2,ZNF280B	11
Cellular Movement	Migration of melanoma cell lines	0.00126		0.728	AHNAK,CD36,CDH1,CST6,CXCL12,MCAM,MITF	7
Dermatological Diseases and Conditions, Organismal Injury and Abnormalities	Active stage psoriasis	0.00126			AQP9,CXCL8,DSC2	3
Cellular Function and Maintenance, Hematological System Development and Function, Hypersensitivity Response, Inflammatory Response	Function of eosinophils	0.00126			C3AR1,DUSP5,SPRED1	3
Infectious Diseases	Infection of leukocyte cell lines	0.00126			C1R,C2,C3	3
Hematological Disease, Hereditary Disorder, Immunological Disease, Metabolic Disease, Organismal Injury and Abnormalities	X-linked agammaglobulinemia	0.00126			C3,FCGR3A/FCGR3B,TLR2	3
Carbohydrate Metabolism	Uptake of carbohydrate	0.00127		1.236	ABCA3,AQP9,C3,CAMK2A,CD36,CSF1R,CXCL8,IGF2,KLF15,PARD3,PRKCI,SCARB1,TRIM32	13
Cell-To-Cell Signaling and Interaction, Hematological System Development and Function	Binding of leukocyte cell lines	0.00131		-0.277	ADGRB1,CXCL12,LTF,TLR2,VCAM1	5
Cell-To-Cell Signaling and Interaction, Cellular Movement, Hematological System Development and Function, Immune Cell Trafficking	Recruitment of leukocytes	0.00132	Increased	2.169	C3,C3AR1,CD300LB,CD36,CSF1R,CXCL12,CXCL8,FCGR3A/FCGR3B,IL15RA,LTF,THBS1,TLR2,TRPM2,VCAM1	14
Cellular Development, Cellular Growth and Proliferation, Hematological System Development and Function, Lymphoid Tissue Structure and Development	Proliferation of immune cells	0.00134		0.24	AHNAK,C3,CBLB,CD36,CDH1,CLEC4D,CSF1R,CXCL12,DMTF1,DUSP14,DUSP5,ETS2,FCGR3A/FCGR3B,FKBP1B,GPR183,HRH1,ID3,IGF2,IL15RA,LTF,MRAS,NUP98,THBS1,TLR2,TOB1,VCAM1,ZNF683	27
Organismal Injury and Abnormalities, Renal and Urological Disease, Renal and Urological System Development and Function	Abnormal morphology of urinary system	0.00136			ACVR2B,AKR1B1,CD300LB,CD36,CFB,CFH,CLEC6A,DMTF1,MMACHC,PBX1,SALL2,SLIT3	12
Cancer, Organismal Injury and Abnormalities	Serous adenocarcinoma	0.00139			CDH1,CFB,CFH,CPA3,CST6,CXCL12,CXCL8,IGF2BP3,LDLRAD3,MCAM,NMT2,NOTCH4,PBX1,SEMA3C,SERPING1,SLIT3,ZNF280B	17
Lipid Metabolism, Small Molecule Biochemistry	Esterification of cholesterol	0.00141			C3,CD36,SCARB1,STARD3	4
Cellular Movement, Hematological System Development and Function, Hematopoiesis	Mobilization of hematopoietic progenitor cells	0.00141		0.919	CXCL12,CXCL8,PF4,VCAM1	4
Embryonic Development, Organismal Development	Development of head	0.00141		1.082	ACVR2B,ADGRB1,ANK3,APLP2,ATOH1,BBS4,CFH,CSF1R,CSTB,CTNND1,CXCL12,CXCL8,DCX,EFEMP1,FAM20C,HSPB8,ID3,IGF2,LHX2,MITF,MMACHC,NRP2,PARD3,PRKCI,RALBP1,RPL38,SALL2,SELENOP,SLIT3,TACC2,THBS1,TLR2,TULP3,VCAM1	34
Cell-To-Cell Signaling and Interaction, Cellular Movement	Recruitment of cells	0.00142	Increased	2.302	C3,C3AR1,CD300LB,CD36,CSF1R,CXCL12,CXCL8,FCGR3A/FCGR3B,HRH1,IL15RA,LTF,THBS1,TLR2,TRPM2,VCAM1	15
Cellular Movement	Chemotaxis	0.00142	Increased	2.557	AQP9,C3,C3AR1,CD36,CSF1R,CXCL12,CXCL8,DOCK4,GPR183,HRH1,IGF2,NRP2,PARD3,PF4,PIGR,RALBP1,SLIT3,THBS1,TLR2,TRPM2,VCAM1	21
Cell-To-Cell Signaling and Interaction, Hematological System Development and Function, Inflammatory Response	Aggregation of blood platelets	0.00144		0.626	AKR1B1,C3,CBLB,CD36,CFH,CXCL12,GP5,MYL12B,THBS1,TLR2	10
Cellular Movement, Immune Cell Trafficking	Leukocyte migration	0.00144	Increased	2.711	AQP9,C2,C3,C3AR1,CBLB,CD300LB,CD36,CDH1,CFB,CFH,CSF1R,CXCL12,CXCL8,FCGR3A/FCGR3B,GPR183,HRH1,IGF2,IL15RA,LTF,MCAM,NOTCH4,NRP2,PF4,PIGR,SERPING1,SLIT3,THBS1,TLR2,TRPM2,VCAM1	30
Cellular Development, Cellular Growth and Proliferation, Hematological System Development and Function, Lymphoid Tissue Structure and Development	Proliferation of mononuclear leukocytes	0.00145		0.22	AHNAK,C3,CBLB,CD36,CDH1,CLEC4D,CSF1R,CXCL12,DMTF1,DUSP14,DUSP5,ETS2,FCGR3A/FCGR3B,FKBP1B,GPR183,HRH1,ID3,IGF2,IL15RA,LTF,NUP98,THBS1,TLR2,TOB1,VCAM1,ZNF683	26
Cell-To-Cell Signaling and Interaction, Cellular Assembly and Organization, Skeletal and Muscular System Development and Function	Fusion of myotube	0.0015			IGF2,MYOF,VCAM1	3
Inflammatory Response, Organismal Injury and Abnormalities, Respiratory Disease	Inflammation of airway	0.00151		1	C3,C3AR1,CXCL12,CXCL8,HRH1	5
Endocrine System Development and Function	Insulin sensitivity	0.00155		0	C3,CACNA1D,CADPS,HIF1AN,PBX1,PRKCI,SCARB1,TLR2	8
Cellular Movement	Cell movement of myeloid cells	0.00161	Increased	3.626	AQP9,C2,C3,C3AR1,CD36,CFB,CFH,CSF1R,CXCL12,CXCL8,IL15RA,LTF,MCAM,PF4,PIGR,SERPING1,SLIT3,THBS1,TLR2,TRPM2,VCAM1	21
Cell-To-Cell Signaling and Interaction, Reproductive System Development and Function	Activation of gonadal cell lines	0.00161			CXCL12,TLR2	2
Cell-To-Cell Signaling and Interaction	Adhesion of Candida albicans	0.00161			C3,CFH	2
Cellular Movement, Hematological System Development and Function, Hypersensitivity Response, Immune Cell Trafficking, Inflammatory Response	Chemotaxis of blood-derived mast cells	0.00161			CXCL12,CXCL8	2
Cellular Development, Cellular Growth and Proliferation, Digestive System Development and Function, Embryonic Development, Organ Development, Organismal Development, Tissue Development	Development of Paneth cells	0.00161			ATOH1,CSF1R	2
Infectious Diseases	Entrance of Hepatitis C virus	0.00161			LTF,SCARB1	2
Organ Development	Function of lacrimal gland	0.00161			FAM20C,THBS1	2
Cellular Function and Maintenance, Cellular Movement	Localization of myeloid cells	0.00161			C3,CXCL12	2
Developmental Disorder, Hereditary Disorder, Metabolic Disease, Organismal Injury and Abnormalities, Renal and Urological Disease	Methylmalonic acidemia and homocystinuria	0.00161			HCFC1,MMACHC	2
Cardiovascular System Development and Function, Tissue Morphology	Morphology of microvessel	0.00161			CYGB,NOTCH4	2
Cell Death and Survival, Organismal Survival	Survival of Staphylococcus aureus	0.00161			CFH,SCARB1	2
Organismal Survival	Survival of parasite	0.00161			ABCA3,TLR2	2
Cellular Movement, Hematological System Development and Function, Immune Cell Trafficking	Transendothelial migration of PBMCs	0.00161			CXCL12,CXCL8	2
Cellular Compromise, Inflammatory Response	Degranulation of leukocyte cell lines	0.00161		0.64	C3,C3AR1,DUSP5,GRK5,PRTG	5
Cellular Assembly and Organization, Cellular Function and Maintenance	Organization of cytoplasm	0.00164		1.531	ADGRB1,AHNAK,ANK3,ARHGAP32,ATXN10,BBS4,C3,CALD1,CAMK2A,CDH1,CEP162,CFAP53,CSF1R,CTNND1,CXCL12,CXCL8,DCX,DOCK4,DYNC1H1,DYNLT1,GRK5,KIF20B,KPNB1,LHX2,LTF,MAP7D3,MRAS,MTUS1,NME1,NRP2,NRXN1,PARD3,PARD6B,PARVB,PKP4,PRKCI,RALBP1,RGS6,SLC11A2,SLIT3,SMURF1,SNX33,STX2,TACC2,TEX14,THBS1,ULK2	47
Cell-To-Cell Signaling and Interaction, Cellular Assembly and Organization, Cellular Function and Maintenance	Assembly of intercellular junctions	0.00166		0.179	ADGRB1,ATOH1,CDH1,CHRM5,CXCL8,NRXN1,PARD3,PARD6B,PKP4,PRKCI,THBS1,TLR2	12
Cellular Development, Cellular Growth and Proliferation, Tissue Development	Development of epithelial cells	0.00167		1.982	ABCA3,ATOH1,CDH1,CFAP53,CSF1R,MITF,NME1,STX2	8
Cancer, Organismal Injury and Abnormalities, Reproductive System Disease	Breast carcinoma	0.0017		-0.218	C3,C3AR1,CALD1,CDH1,CTDSPL,CTNND1,CXCL12,CXCL8,DNAH7,ECM1,HSPB8,NMT2,NRP2,PF4,PRKCI,RALBP1,STX2,TBC1D9,THBS1	19
Cell-To-Cell Signaling and Interaction	Adhesion of melanoma cell lines	0.00171		1.982	CDH1,CST6,NME1,THBS1	4
Cardiovascular System Development and Function, Embryonic Development, Organismal Development, Tissue Development	Angiogenesis of extraembryonic tissue	0.00171		0.283	CDH1,ECM1,NRP2,THBS1	4
Lipid Metabolism, Small Molecule Biochemistry	Incorporation of lipid	0.00171		1.899	ABCA3,C3,CD36,SCARB1	4
Cell-To-Cell Signaling and Interaction, Hematological System Development and Function, Immune Cell Trafficking	Adhesion of granulocytes	0.00172		1.689	C3,CFH,CXCL8,LTF,PF4,TLR2,VCAM1	7
Hereditary Disorder, Organismal Injury and Abnormalities, Renal and Urological Disease	Autosomal dominant kidney disease	0.00172			ADAMTS2,C3,CALD1,CFB,PIGR,POU6F2,SEMA3C	7
Cellular Movement	Cell movement of connective tissue cells	0.00173		0.497	COL7A1,CSF1R,CXCL12,CXCL8,CYGB,GPR183,LTF,MRAS,PF4,SYNE2,THBS1	11
Cardiovascular System Development and Function, Cell-To-Cell Signaling and Interaction	Adhesion of endothelial cells	0.00174		0.056	CD36,CXCL12,CXCL8,MCAM,PF4,SERPING1,THBS1,VCAM1	8
Cancer, Cell-To-Cell Signaling and Interaction, Organismal Injury and Abnormalities	Binding of cancer cells	0.00176			CXCL12,THBS1,VCAM1	3
Cardiovascular System Development and Function, Cellular Movement, Immune Cell Trafficking	Migration of lymphatic endothelial cells	0.00176			CXCL12,CXCL8,IGF2	3
Cellular Movement, Nervous System Development and Function	Positioning of neurons	0.00176			ATOH1,DCX,NRP2	3
Cell-To-Cell Signaling and Interaction	Response of endothelial cells	0.00176			CD36,THBS1,TLR2	3
Lipid Metabolism, Molecular Transport, Small Molecule Biochemistry	Uptake of palmitic acid	0.00176			CD36,ERFE,SCARB1	3
Cancer, Organismal Injury and Abnormalities	Growth of carcinoma	0.0018		-0.371	AKR1B1,C3AR1,CDHR5,ID3,PRKCI,SMYD2,THBS1,ZMYND10	8
Cell-To-Cell Signaling and Interaction	Adhesion of tumor cell lines	0.00183		1.699	CDH1,CFH,CST6,CXCL12,CXCL8,EFEMP1,LTF,NME1,PARD3,PARVB,THBS1,TLR2,VCAM1	13
Cell Morphology, Cellular Assembly and Organization, Cellular Function and Maintenance, Nervous System Development and Function	Extension of neurites	0.00184			CDH1,CXCL12,DCX,DOCK4,LHX2,LTF,NRP2,SMURF1,ULK2	9
Cellular Function and Maintenance	Engulfment of bacteria	0.00184		-0.345	ADGRB1,C3,CFH,PIGR,TLR2	5
Hematological System Development and Function, Lymphoid Tissue Structure and Development, Tissue Morphology	Quantity of T lymphocytes	0.00185		0.71	C3AR1,CBLB,DMTF1,DUSP5,ETS2,GADD45G,HRH1,ID3,IGF2,IL15RA,MR1,NOTCH4,NUP98,PBX1,PIGR,POLR3E,THBS1,TLR2,TOB1,VCAM1	20
Cell-To-Cell Signaling and Interaction, Hematological System Development and Function, Immune Cell Trafficking, Inflammatory Response	Adhesion of phagocytes	0.00187		1.471	C3,CDH1,CFH,CXCL8,MITF,PF4,TLR2,VCAM1	8
Cellular Development, Cellular Growth and Proliferation	Cell proliferation of tumor cell lines	0.00187		-0.624	AHNAK,ATOH1,CACNA1D,CARD10,CDH1,CPSF4,CST6,CTNND1,CXCL12,CXCL8,DCX,DMTF1,DSC2,DUSP5,DYNC1H1,EFEMP1,ETS2,GADD45G,GALNT2,GRK5,HIF1AN,HSPB8,ID3,IGF2,IGF2BP3,IL15RA,MITF,MRAS,MTUS1,NME1,NOTCH4,NRP2,OSBP2,OSGIN1,PARVB,POLK,PRKCI,RALBP1,SCARB1,SLIT3,SMYD2,SRM,TACC2,THBS1,TLR2,TRPM2,ULK2,VCAM1	48
Cardiovascular Disease, Organismal Injury and Abnormalities, Skeletal and Muscular Disorders	Myocardial infarction	0.00188			C3,CACNA1D,CD36,CSF1R,CXCL12,CXCL8,FCGR3A/FCGR3B,GUCY1A2,SCARB1,TLR2	10
Infectious Diseases	Sepsis	0.00196		1.067	C3,CD36,CXCL8,FCGR3A/FCGR3B,GABRD,GUCY1A2,LTF,SCARB1,SERPING1	9
Cellular Movement	Invasion of squamous cell carcinoma cell lines	0.00197		-0.625	CARD10,CXCL12,GALNT2,NME1,PRKCI	5
Cellular Movement	Migration of breast cancer cell lines	0.00197		1.066	AHNAK,CDH1,CST6,CXCL12,CXCL8,DUSP5,ECM1,MCAM,MTUS1,NME1,OSGIN1,SEMA3C	12
Hematological System Development and Function, Tissue Morphology	Quantity of blood cells	0.00202		-0.05	C3,C3AR1,CBLB,CD36,CFH,CLEC4D,CSF1R,CXCL12,CXCL8,DMTF1,DUSP5,ETS2,GADD45G,GPR183,HRH1,ID3,IGF2,IL15RA,LHX2,MR1,NOTCH4,NUP98,PBX1,PF4,PIGR,POLR3E,SCARB1,SLC11A2,SPRED1,THBS1,TLR2,TOB1,VCAM1	33
Infectious Diseases	Parasitic Infection	0.00203		-0.896	AHNAK,AQP9,C3,CD36,CFB,CHRM5,PIGR,SELENOP,TLR2	9
Free Radical Scavenging	Production of superoxide	0.00203		0.415	AKR1B1,CD36,CXCL8,FCGR3A/FCGR3B,LTF,MTUS1,TLR2	7
Cell Morphology, Cellular Movement	Cell spreading of leukemia cell lines	0.00205			C3,CXCL12,VCAM1	3
Cardiovascular System Development and Function, Cellular Movement	Chemotaxis of endothelial cell lines	0.00205			CD36,CXCL8,THBS1	3
Cellular Development, Cellular Growth and Proliferation, Organismal Development, Tissue Development	Development of endocrine cells	0.00205			ATOH1,CACNA1D,THBS1	3
Hereditary Disorder, Immunological Disease, Organismal Injury and Abnormalities	Wiskott-Aldrich syndrome	0.00205			C3,FCGR3A/FCGR3B,OAS1	3
Organismal Injury and Abnormalities, Reproductive System Disease	Endometrioma	0.00206			PIGR,SCARB1,TBC1D2,TOB1	4
Cell-To-Cell Signaling and Interaction, Hematological System Development and Function	Aggregation of blood cells	0.00207		0.351	AKR1B1,C3,CBLB,CD36,CDH1,CFH,CXCL12,GP5,MYL12B,THBS1,TLR2	11
Hematological System Development and Function, Immune Cell Trafficking, Inflammatory Response, Tissue Development	Accumulation of phagocytes	0.00208		0.522	C3,CD300LB,CXCL12,CXCL8,ETS2,FCGR3A/FCGR3B,THBS1,VCAM1	8
Cell-To-Cell Signaling and Interaction, Hematological System Development and Function, Immune Cell Trafficking, Inflammatory Response	Adhesion of neutrophils	0.00208		1.453	C3,CFH,CXCL8,PF4,TLR2,VCAM1	6
Cellular Movement	Migration of hepatoma cell lines	0.00208		-0.973	CXCL12,CXCL8,GALNT2,IGF2,IGF2BP3,VCAM1	6
Endocrine System Disorders, Gastrointestinal Disease, Metabolic Disease, Organismal Injury and Abnormalities	Diabetes mellitus	0.00209		-0.391	AKR1B1,C2,C3,C3AR1,CACNA1D,CBLB,CD36,CFB,CFH,CHRM5,CLEC6A,COL6A1,COL7A1,CXCL8,CYP4F2,ECM1,FCGR3A/FCGR3B,GABRD,HRH1,IGF2,IL15RA,MR1,NMT2,NOTCH4,OAS1,PRKCI,SCARB1,SERPING1,TLR2,VCAM1	30
Free Radical Scavenging	Generation of reactive oxygen species	0.0021		0.096	AKR1B1,C3AR1,CD36,CFH,CSTB,LTF,RGS6,TLR2,ULK2,VCAM1	10
Hematological System Development and Function, Tissue Morphology	Quantity of leukocytes	0.00213		-0.272	C3,C3AR1,CBLB,CD36,CFH,CLEC4D,CSF1R,CXCL12,CXCL8,DMTF1,DUSP5,ETS2,GADD45G,GPR183,HRH1,ID3,IGF2,IL15RA,MR1,NOTCH4,NUP98,PBX1,PIGR,POLR3E,SCARB1,SPRED1,THBS1,TLR2,TOB1,VCAM1	30
Neurological Disease	Cognitive impairment	0.00217		1.134	ANK3,C3,CD36,CHRM5,CXCL8,CYGB,DCX,DYNC1H1,FKBP1B,GABRD,HCFC1,HRH1,IGF2,IL15RA,NRP2,SLC1A4,TRPM2	17
Cell-To-Cell Signaling and Interaction, Hematological System Development and Function	Activation of myeloid cells	0.00219		1.865	C3,CD300LB,CD36,CFH,CSF1R,CXCL8,FCGR3A/FCGR3B,LTF,PF4,SERPING1,THBS1,TLR2,TRPM2,VCAM1	14
Organ Morphology, Organismal Injury and Abnormalities, Renal and Urological Disease, Renal and Urological System Development and Function	Abnormal morphology of kidney	0.00223			ACVR2B,AKR1B1,CD300LB,CD36,CFB,CFH,CLEC6A,MMACHC,PBX1,SALL2,SLIT3	11
Cellular Function and Maintenance, Hematological System Development and Function	Function of granulocytes	0.00224			C3AR1,CXCL8,DUSP5,SPRED1	4
Cell Morphology, Cellular Assembly and Organization, Cellular Function and Maintenance	Extension of cellular protrusions	0.00228		0.589	CDH1,CXCL12,CXCL8,DCX,DOCK4,LHX2,LTF,NRP2,SMURF1,ULK2	10
Cancer, Organismal Injury and Abnormalities	Tumorigenesis of adenocarcinoma	0.00228			AQP9,CDH1,CFH,CSF1R,CTDSPL,CTNND1,CYGB,ETS2,GABRD,MCAM,MITF,NME1,NOTCH4,OSMR,PBX1,PF4,RALBP1,SEMA3C,SERPING1,SLC1A4,SRM,STX2,THBS1,TLR2	24
Cell Morphology, Cellular Assembly and Organization, Cellular Development, Cellular Function and Maintenance, Cellular Growth and Proliferation, Nervous System Development and Function, Organismal Development, Tissue Development	Neuritogenesis	0.00234		1.139	ADGRB1,ANK3,ARHGAP32,ATXN10,BBS4,C3,CALD1,CAMK2A,CXCL12,DCX,DYNLT1,KIF20B,MRAS,NRP2,NRXN1,PARD3,PARD6B,PKP4,PRKCI,SLC11A2,SLIT3,ULK2	22
Free Radical Scavenging	Synthesis of reactive oxygen species	0.00237		1.139	AKR1B1,C3,C3AR1,CD36,CFB,CFH,CSTB,CXCL12,CXCL8,FCGR3A/FCGR3B,LTF,MTUS1,RGS6,SCARB1,TLR2,TRPM2,ULK2,VCAM1	18
Cellular Assembly and Organization, Cellular Function and Maintenance	Localization of centrosome	0.00237			CCDC141,PARD3,SYNE2	3
Cardiovascular System Development and Function, Cellular Development, Cellular Function and Maintenance, Cellular Growth and Proliferation, Embryonic Development, Hematological System Development and Function, Lymphoid Tissue Structure and Development, Organ Development, Organismal Development, Tissue Development	Proliferation of lymphatic endothelial cells	0.00237			CXCL8,IGF2,SPRED1	3
Cellular Function and Maintenance	Retention of cells	0.00237			CSF1R,CXCL12,VCAM1	3
Organ Morphology	Size of endocrine gland	0.00237			ACVR2B,CACNA1D,IGF2,SCG5,TLR2	5
Free Radical Scavenging	Activation of reactive oxygen species	0.0024			CXCL8,VCAM1	2
Hereditary Disorder, Organismal Injury and Abnormalities, Skeletal and Muscular Disorders	Arthrogryposis, renal dysfunction, cholestasis	0.0024			PF4,THBS1	2
Cellular Movement	Chemotaxis of cervical cancer cell lines	0.0024			CXCL12,CXCL8	2
Dermatological Diseases and Conditions, Hereditary Disorder, Immunological Disease, Organismal Injury and Abnormalities	Hereditary angioedema	0.0024			C1R,SERPING1	2
Cancer, Organismal Injury and Abnormalities	Micrometastasis	0.0024			CDH1,VCAM1	2
Energy Production, Lipid Metabolism, Small Molecule Biochemistry	Oxidation of cholesterol	0.0024			CD36,SCARB1	2
Cellular Development, Cellular Growth and Proliferation	Proliferation of spleen cell lines	0.0024			IL15RA,PIGR	2
Nervous System Development and Function, Organ Morphology, Tissue Morphology	Quantity of dorsal root ganglion cells	0.0024			ATOH1,TRPM2	2
Cellular Movement	Release of hematopoietic progenitor cells	0.0024			CXCL12,VCAM1	2
Neurological Disease	Spatial memory impairment	0.0024			FKBP1B,TRPM2	2
Cell Death and Survival, Nervous System Development and Function	Survival of corticospinal neurons	0.0024			CXCL12,IGF2	2
Cell Death and Survival, Hematological System Development and Function	Survival of erythroblasts	0.0024			CXCL8,PF4	2
Ophthalmic Disease, Organismal Injury and Abnormalities	Susceptibility to age related macular degeneration	0.0024			C3,CFH	2
Cellular Function and Maintenance	Uptake of leukocytes	0.0024			C3,CD36	2
Cardiovascular Disease, Organismal Injury and Abnormalities	Acute coronary syndrome	0.00241			C3,CACNA1D,CD36,CSF1R,CXCL12,CXCL8,FCGR3A/FCGR3B,GABRD,GUCY1A2,SCARB1,TLR2	11
Cellular Assembly and Organization	Quantity of vesicles	0.00241		0.9	ABCA3,C3,CADPS,CAMK2A,SCARB1,SNX33	6
Cardiovascular Disease, Hematological Disease, Organismal Injury and Abnormalities	Thrombus	0.00241		0.73	C2,C3,CBLB,CD36,CFB,CFH,GP5,PF4,THBS1,TLR2	10
Embryonic Development, Organismal Development	Development of body axis	0.00243		1.082	ACVR2B,ADGRB1,ANK3,APLP2,ATOH1,BBS4,CFH,CSF1R,CSTB,CTNND1,CXCL12,CXCL8,DCX,EFEMP1,FAM20C,HSPB8,ID3,IGF2,LHX2,MITF,MMACHC,NRP2,PARD3,PBX1,PRKCI,RALBP1,RPL38,SALL2,SELENOP,SLIT3,TACC2,THBS1,TLR2,TULP3,VCAM1	35
Cellular Function and Maintenance, Small Molecule Biochemistry	Homeostasis of divalent cations	0.00244			APLP2,BDH2,CACNA1D,CXCL12,IGF2,PF4,SLC11A2,TMTC2,TRPM2	9
Neurological Disease	Neurological signs	0.00247		-0.378	ARHGAP32,C3,CACNA1D,CAMK2A,CD36,CHRM5,DUSP5,DYNLT1,FAM117A,FKBP1B,GABRD,HRH1,ID3,IGF2,IL15RA,NME1,NMT2,SCARB1,SLC1A4,SRD5A1,SRM,STARD10,TRPM2	23
Neurological Disease	Progressive neurological disorder	0.00247		-1	ANK3,C3,CACNA1D,CBLB,CD36,CHRM5,CSTB,CXCL12,ETS2,FCGR3A/FCGR3B,GABRD,GATM,HRH1,ITPR2,LTF,MCAM,OAS1,SERPING1,SLC1A4,TLR2	20
Cellular Development, Cellular Growth and Proliferation, Hematological System Development and Function, Lymphoid Tissue Structure and Development	Proliferation of lymphocytes	0.00249		-0.074	AHNAK,C3,CBLB,CD36,CDH1,CLEC4D,CXCL12,DMTF1,DUSP14,DUSP5,ETS2,FCGR3A/FCGR3B,FKBP1B,GPR183,HRH1,ID3,IGF2,IL15RA,LTF,NUP98,THBS1,TLR2,TOB1,VCAM1,ZNF683	25
Cell Morphology	Sprouting	0.00249		0.878	ADGRB1,ARHGAP32,C3,CALD1,CAMK2A,CDH1,CTNND1,CXCL12,DCX,DYNLT1,IGF2,NOTCH4,NRP2,PKP4,THBS1,ULK2	16
Cardiovascular System Development and Function, Cellular Development, Cellular Function and Maintenance, Cellular Growth and Proliferation, Organismal Development, Tissue Development	Cell proliferation of vascular endothelial cells	0.00256		-0.047	C3,CXCL12,CXCL8,HIF1AN,HRH1,MYOF,NRP2,THBS1	8
Cardiovascular System Development and Function, Cellular Development, Cellular Growth and Proliferation, Organ Development, Skeletal and Muscular System Development and Function, Tissue Development	Proliferation of vascular smooth muscle cells	0.00256		-0.239	AKR1B1,CAMK2A,CXCL12,CXCL8,ID3,SCARB1,SYNE2,TLR2	8
Neurological Disease	Progressive motor neuropathy	0.00261			C3,CACNA1D,CBLB,CD36,CHRM5,CXCL12,ETS2,FCGR3A/FCGR3B,GABRD,GATM,HRH1,ITPR2,LTF,MCAM,OAS1,SERPING1,SLC1A4,TLR2	18
Carbohydrate Metabolism, Small Molecule Biochemistry	Binding of glycosaminoglycan	0.00266		-1	CDH1,CXCL12,CXCL8,THBS1	4
Skeletal and Muscular System Development and Function	Length of skeleton	0.00266			ECM1,IGF2,OSMR,SMURF1	4
Cellular Movement, Hematological System Development and Function, Immune Cell Trafficking	Migration of leukocyte cell lines	0.00266		0.787	C3,CSF1R,CXCL12,CXCL8	4
Cellular Movement, Hematological System Development and Function	Mobilization of blood cells	0.00268		0.376	C3AR1,CXCL12,CXCL8,PF4,VCAM1	5
Cellular Function and Maintenance, Small Molecule Biochemistry	Homeostasis of metal ion	0.00269			APLP2,BDH2,CACNA1D,CXCL12,ERFE,IGF2,PF4,SLC11A2,TMTC2,TRPM2	10
Cellular Movement, Hematological System Development and Function, Immune Cell Trafficking	Cell movement of granulocytes	0.0027	Increased	2.933	AQP9,C2,C3,C3AR1,CD36,CFB,CFH,CXCL12,CXCL8,LTF,PF4,PIGR,TLR2,TRPM2,VCAM1	15
Cellular Development, Cellular Growth and Proliferation, Embryonic Development	Arrest in proliferation of embryonic cell lines	0.00272			AKR1B1,DMTF1,OSBP2	3
Cancer, Cell Death and Survival, Organismal Injury and Abnormalities, Tumor Morphology	Cell viability of chronic lymphocytic leukemia cells	0.00272			CXCL12,CXCL8,VCAM1	3
Digestive System Development and Function, Organismal Development	Secretion of saliva	0.00272			C3,ID3,ITPR2	3
Immunological Disease	Allergy	0.00272		1.387	AHNAK,C1R,C3,C3AR1,CD1A,CHRM5,CST6,CXCL8,ECM1,HRH1,IGF2,OSMR,RAB11B,SERPING1,SYNE2,TLR2	16
Cell Morphology, Inflammatory Response	Morphology of phagocytes	0.00274			C3,CPA3,CSF1R,CXCL8,ETS2,MITF,TLR2,TRPM2	8
Organismal Survival	Survival of organism	0.00275		1.453	ABCA3,C3,C3AR1,CDH1,CFB,CFH,CLEC4D,CTNND1,CXCL12,ETS2,FCGR3A/FCGR3B,IGF2,IL15RA,LTF,NME1,OSMR,RALBP1,RGS6,SCARB1,SCG5,SELENOP,SERPING1,THBS1,TLR2,ZNF420	25
Cell Morphology	Polarization of cells	0.00283		1.586	AQP9,CD36,CDH1,CXCL12,CXCL8,PARD3,PRKCI,SYNE2,TLR2	9
Connective Tissue Disorders, Immunological Disease, Inflammatory Disease, Organismal Injury and Abnormalities, Skeletal and Muscular Disorders	Lupus erythematosus	0.00283			C1R,C2,C3,CHRM5,FCGR3A/FCGR3B,HRH1,LTF,OAS1,TLR2,VCAM1	10
Organismal Injury and Abnormalities	Cytosis	0.00284		-0.885	C3,CSF1R,CXCL12,CXCL8,FCGR3A/FCGR3B,GRK5,IRAK2,ITPR2,LHX2,PF4,SCARB1,SEMA3C,SLC11A2,TLR2	14
Cell Morphology, Digestive System Development and Function, Endocrine System Disorders, Gastrointestinal Disease, Organ Morphology, Organismal Development, Organismal Injury and Abnormalities	Abnormal morphology of islet cells	0.00284			CACNA1D,CADPS,PBX1,SCG5,TLR2	5
Dermatological Diseases and Conditions, Immunological Disease, Inflammatory Disease, Inflammatory Response, Organismal Injury and Abnormalities	Atopic dermatitis	0.00286			AHNAK,C3,CD1A,CHRM5,CST6,CXCL8,HRH1,OSMR,RAB11B,SYNE2,TLR2	11
Immunological Disease	Immediate hypersensitivity	0.00288			AHNAK,C3,C3AR1,CD1A,CHRM5,CST6,CXCL8,ECM1,HRH1,OSMR,RAB11B,SYNE2,TLR2	13
Cellular Movement	Infiltration by myeloid cells	0.00288	Increased	3.091	C2,C3,C3AR1,CD36,CFB,CFH,CSF1R,CXCL8,IL15RA,PF4,SERPING1,TLR2,TRPM2	13
Organismal Injury and Abnormalities, Renal and Urological Disease	Damage of renal tubule	0.00288			C3,CFB,THBS1,TLR2	4
Endocrine System Disorders, Gastrointestinal Disease, Immunological Disease, Metabolic Disease, Organismal Injury and Abnormalities	Insulin-dependent diabetes mellitus	0.003			C3AR1,CBLB,CFB,CFH,CLEC6A,CXCL8,ECM1,MR1,NMT2,OAS1,SERPING1,TLR2,VCAM1	13
Cardiovascular Disease, Cardiovascular System Development and Function, Organ Morphology, Organismal Development, Organismal Injury and Abnormalities	Abnormal morphology of heart septum	0.00301			FKBP1B,HSPB8,IGF2,THBS1,VCAM1	5
Molecular Transport	Transport of molecule	0.00305	Increased	2.02	ABCA3,ANK3,APLP2,AQP9,BDH2,C3,C3AR1,CACNA1D,CADPS,CAMK2A,CBLB,CD36,CFH,CHRM5,CLEC6A,CXCL12,CXCL8,DYNLT1,ERFE,GABRD,IL15RA,ITPR2,KLF15,KPNB1,LTF,NRXN1,NUP98,OSBPL5,PIGR,PRKCI,RAB11B,RALBP1,SCARB1,SCG5,SELENOP,SLC11A2,SLC1A4,SLC28A3,SLC45A3,SMURF1,STARD3,STX2,THBS1,TLR2,TOB1,TRPM2	46
Cellular Development, Cellular Growth and Proliferation, Nervous System Development and Function, Tissue Development	Development of neurons	0.00306		0.816	ADGRB1,ANK3,ARHGAP32,ATOH1,ATXN10,BBS4,C3,CALD1,CAMK2A,CDH1,CHRM5,CXCL12,DCX,DYNLT1,KIF20B,MRAS,NRP2,NRXN1,PARD3,PARD6B,PKP4,PRKCI,SLC11A2,SLIT3,THBS1,TLR2,ULK2	27
Lipid Metabolism, Small Molecule Biochemistry	Synthesis of eicosanoid	0.00307		-0.554	AKR1B1,CD36,CXCL8,CYP4F2,HRH1,IGF2,LTF,MITF,PRKCI,TLR2	10
Organ Morphology	Morphology of gland	0.00307			ACVR2B,C3AR1,CACNA1D,CADPS,FAM20C,ID3,IGF2,ITPR2,PBX1,PRKCI,SCARB1,SCG5,SRD5A1,THBS1,TLR2	15
Cell Death and Survival	Apoptosis	0.0031		-0.779	ACVR2B,AFAP1L2,AKR1B1,ARID3B,ARMC10,ATOH1,BBS4,C3,C3AR1,CAMK2A,CBLB,CD36,CDH1,CFH,COX6B1,CSF1R,CSTB,CTNND1,CXCL12,CXCL8,CYGB,DUSP5,DYNC1H1,EFEMP1,ETS2,EVA1C,FCGR3A/FCGR3B,GADD45G,GRK5,HIF1AN,HMGN5,HSPB8,ID3,IGF2,IL15RA,ING5,IRAK2,ITPR2,LHX2,LTF,MCAM,MITF,MTUS1,NME1,NOTCH4,OAS1,OSBP2,OSGIN1,OSMR,PARD3,PARVB,PBX1,PF4,POLR3E,PRKCI,RALBP1,RGS6,RYBP,SALL2,SCARB1,SELENOP,SIVA1,SMURF1,SNX33,THBS1,TLR2,T…	70
Digestive System Development and Function, Embryonic Development, Endocrine System Development and Function, Organ Development, Organismal Development, Tissue Development	Formation of islets of Langerhans	0.0031			CACNA1D,PBX1,THBS1	3
Lipid Metabolism, Small Molecule Biochemistry	Incorporation of long chain fatty acid	0.0031			ABCA3,C3,CD36	3
Nervous System Development and Function	Regeneration of nerves	0.0031			CXCL12,DOCK3,IGF2	3
Psychological Disorders	Mood Disorders	0.00318			ANK3,CACNA1D,CAMK2A,CHRM5,CXCL8,GABRD,GATM,HRH1,ITPR2,NMT2,PF4,PRKCI,SLC1A4,SMURF1,TOB1	15
Cell Death and Survival, Hematological System Development and Function	Cell viability of myeloid cells	0.00318		0.766	ACTL6A,CSF1R,CXCL12,CXCL8,NME1,PF4	6
Cell Death and Survival	Apoptosis of mononuclear leukocytes	0.00318	Decreased	-2.079	C3AR1,CXCL12,DUSP5,ETS2,FCGR3A/FCGR3B,GRK5,ID3,IL15RA,ITPR2,PF4,POLR3E,SIVA1,THBS1,TLR2	14
Cell-To-Cell Signaling and Interaction, Reproductive System Development and Function	Binding of gonadal cell lines	0.00318		1.762	APLP2,CXCL12,LTF,PF4,VCAM1	5
Cell Morphology	Cell polarity formation	0.00318			OOEP,PARD3,PARD6B,PRKCI,SYNE2	5
Cellular Movement	Cell movement of breast cancer cell lines	0.00319		1.254	AHNAK,CDH1,CST6,CXCL12,CXCL8,DUSP5,ECM1,MCAM,MTUS1,NME1,OSGIN1,SEMA3C,SIVA1	13
Cell Death and Survival	Cell viability	0.00331		-0.601	ACTL6A,ACVR2B,AFAP1L2,C3,CARD10,CDH1,CSF1R,CTDSPL,CXCL12,CXCL8,DUSP14,DUSP5,ECM1,ETS2,FCGR3A/FCGR3B,FKBP1B,HEATR1,HSPB8,HSPBAP1,IGF2,IGF2BP3,KIFC2,LTF,MCAM,MITF,MRAS,NME1,PBX1,PF4,POLK,POLR1D,PRKCI,RPL38,SCARB1,SCG5,SLC11A2,TBC1D9,THBS1,TLR2,VCAM1	40
Cell-To-Cell Signaling and Interaction, Embryonic Development	Activation of embryonic cells	0.00333			CXCL12,IGF2	2
Cell-To-Cell Signaling and Interaction, Connective Tissue Development and Function	Adhesion of bone marrow stromal cells	0.00333			CXCL12,VCAM1	2
Developmental Disorder, Hereditary Disorder, Ophthalmic Disease, Organismal Injury and Abnormalities	Autosomal recessive ocular coloboma	0.00333			MITF,SALL2	2
Cell-To-Cell Signaling and Interaction, Reproductive System Development and Function	Binding of granulosa cells	0.00333			IGF2,SCARB1	2
Cell Morphology, Cellular Development, Cellular Growth and Proliferation, Embryonic Development	Branching of tumor cell lines	0.00333			CDH1,CTNND1	2
Cell-To-Cell Signaling and Interaction, Cellular Assembly and Organization	Cell-cell adhesion of pancreatic cancer cell lines	0.00333			CDH1,PARD3	2
Cellular Movement	Chemotaxis of germ cell tumor cell lines	0.00333			CXCL12,CXCL8	2
Cell Cycle, Cell-To-Cell Signaling and Interaction, Cellular Growth and Proliferation	Contact growth inhibition of cervical cancer cell lines	0.00333			NME1,TTC5	2
Immunological Disease, Organismal Injury and Abnormalities	Damage of spleen	0.00333			C3AR1,TLR2	2
Cell Morphology, Cellular Assembly and Organization, Cellular Development, Cellular Function and Maintenance, Cellular Growth and Proliferation, Nervous System Development and Function, Organismal Development, Tissue Development	Development of sensory projections	0.00333			NRP2,SLIT3	2
Developmental Disorder, Embryonic Development, Organismal Development, Tissue Morphology	Lack of heart tube	0.00333			ACVR2B,PRKCI	2
Cellular Movement, Hematological System Development and Function, Hematopoiesis	Mobilization of myeloid progenitor cells	0.00333			CXCL8,PF4	2
Free Radical Scavenging, Lipid Metabolism, Small Molecule Biochemistry	Modification of lipid peroxide	0.00333			CYGB,SELENOP	2
Cell Death and Survival, Hematological System Development and Function	Survival of megakaryocytes	0.00333			CXCL8,PF4	2
Endocrine System Development and Function, Lipid Metabolism, Small Molecule Biochemistry, Vitamin and Mineral Metabolism	Synthesis of dihydrotestosterone	0.00333			IGF2,SRD5A1	2
Cardiovascular System Development and Function, Cell Morphology, Cellular Development, Cellular Function and Maintenance, Cellular Growth and Proliferation, Organismal Development, Tissue Development	Morphogenesis of endothelial cells	0.00337			CXCL8,HEG1,NOTCH4,VCAM1	4
Cell-To-Cell Signaling and Interaction, Cellular Compromise, Cellular Function and Maintenance, Inflammatory Response	Respiratory burst of phagocytes	0.00337		1.951	C3,CXCL8,PF4,VCAM1	4
Cardiovascular System Development and Function, Organ Morphology, Organismal Development	Size of heart ventricle	0.00337			HSPB8,KLF15,TRPM2,VCAM1	4
Skeletal and Muscular System Development and Function	Size of skeleton	0.00337			ECM1,IGF2,OSMR,SMURF1	4
Cellular Function and Maintenance	Uptake of cells	0.00337		1.091	C3,CD36,CFH,TLR2	4
Cancer, Organismal Injury and Abnormalities	Head and neck neoplasia	0.00339			AKR1B1,ATOH1,C3,CACNA1D,CADPS,CDH1,CHRM5,CSF1R,CTDSPL,CTNND1,CXCL12,CXCL8,EFEMP1,IGF2,IL15RA,LDLRAD3,MTUS1,NME1,NMT2,SCG5,TBC1D9,THBS1,TLR2,TRIM32,VCAM1,ZMYND10,ZNF280B	27
Cell Death and Survival, Organismal Injury and Abnormalities	Apoptosis of vascular endothelial cells	0.00347		1.746	CD36,CXCL12,CXCL8,HIF1AN,MCAM,THBS1	6
Cellular Movement, Hematological System Development and Function, Immune Cell Trafficking, Inflammatory Response	Cell movement of Langerhans cells	0.00351			C3,CDH1,CXCL12	3
Cellular Development, Connective Tissue Development and Function, Tissue Development	Differentiation of connective tissue cells	0.00354		0.978	ACVR2B,BBS4,C3,C3AR1,COL6A1,CSF1R,CTNND1,CXCL8,ECM1,EFEMP1,FAM120B,FAM20C,GPR183,GRK5,ID3,IGF2,LTF,MITF,SCAND1,SMURF1,TLR2,TOB1,TRIM32	23
Cellular Movement	Migration of squamous cell carcinoma cell lines	0.00356		0.651	CDH1,CXCL12,GALNT2,HIF1AN,PRKCI	5
Cancer, Organismal Injury and Abnormalities	Tumorigenesis of epithelial neoplasm	0.00361		-1.42	AQP9,ATOH1,C3,C3AR1,CACNA1D,CALD1,CDH1,CFH,CSF1R,CTDSPL,CTNND1,CYGB,DUSP5,ETS2,GABRD,IGF2,MCAM,MITF,NME1,NOTCH4,OSMR,PBX1,PF4,PRKCI,RALBP1,SELENOP,SEMA3C,SERPING1,SLC1A4,SLIT3,SRM,STX2,THBS1,TLR2,VCAM1	35
Cell-mediated Immune Response, Cellular Movement, Hematological System Development and Function, Immune Cell Trafficking	NK cell migration	0.00363			CXCL12,CXCL8,TLR2,VCAM1	4
Cancer, Cellular Development, Cellular Growth and Proliferation, Organismal Injury and Abnormalities, Tumor Morphology	Proliferation of cancer cells	0.00363		-0.719	AFAP1L2,AKR1B1,CDH1,CDHR5,CST6,CXCL12,CXCL8,DOCK4,ID3,IGF2,MCAM,PRKCI,THBS1,ZMYND10	14
Cell Morphology	Shape change of tumor cell lines	0.00366		1.564	C3,CDH1,CTNND1,CXCL12,CXCL8,PARVB,THBS1,VCAM1	8
Neurological Disease	Frontotemporal lobar degeneration or amyotrophic lateral sclerosis	0.00367			CD36,CHRM5,CSF1R,ETS2,GABRD,GATM,HRH1,ITPR2,MCAM,SLC1A4	10
Neurological Disease, Psychological Disorders	Major depression	0.00367			CAMK2A,CHRM5,CXCL8,GABRD,GATM,HRH1,PRKCI,SLC1A4,SMURF1,TOB1	10
Cellular Development, Cellular Growth and Proliferation, Connective Tissue Development and Function	Proliferation of fibroblast cell lines	0.00376		0.402	AKR1B1,ARHGAP32,CSF1R,CXCL12,CYGB,DMTF1,GADD45G,GRK5,HSPB8,IGF2,KIF20B,MITF,PBX1,THBS1,TOB1,TRIM32	16
Organismal Injury and Abnormalities	Angiogenesis of lesion	0.00376		-0.443	C3,CD36,CDH1,CXCL12,PRKCI,THBS1,ZMYND10	7
Organismal Development	Development of genitourinary system	0.00377		0.104	ACVR2B,ADAMTS2,AKR1B1,BBS4,C3AR1,CDH1,CFAP53,CRISP2,CSF1R,CTNND1,CXCL12,DSC2,EFEMP1,GADD45G,GATM,HIF1AN,ID3,IGF2,NME1,NOTCH4,OSBP2,PBX1,SALL2,SCARB1,SELENOP,SMC1B,SRD5A1,STX2,TEX14,THBS1,TLR2,VCAM1	32
Cellular Development, Nervous System Development and Function, Tissue Development	Differentiation of neurons	0.00382		0.375	ANK3,ARHGAP32,ATOH1,CXCL12,DOCK4,ID3,IGF2,KIF7,LHX2,NRXN1,PANX2,PBX1,PRTG,RGS6,TLR2,TRIM32	16
Cellular Compromise, Inflammatory Response	Degranulation of cells	0.00385		1.957	C3,C3AR1,CDH1,CXCL8,DUSP5,FCGR3A/FCGR3B,GRK5,PF4,PRTG,TLR2	10
Cell Morphology, Cellular Development	Branching of cells	0.00386		1.427	ADGRB1,ARHGAP32,C3,CALD1,CAMK2A,CDH1,CTNND1,CXCL12,DCX,DYNLT1,NOTCH4,NRP2,PKP4,STX2,ULK2	15
Cardiovascular Disease, Cardiovascular System Development and Function, Organ Morphology, Organismal Development	Mass of heart	0.0039			FKBP1B,HSPB8,IGF2,KLF15,RGS6,SCARB1,TLR2	7
Humoral Immune Response, Inflammatory Response	Complement activation	0.0039			C2,C3,CFB,CFH	4
Inflammatory Response	Inflammation of absolute anatomical region	0.00392		0.22	C3,C3AR1,CBLB,CD36,CDH1,CFB,CFH,CHRM5,CLEC4D,CSF1R,CST6,CXCL12,CXCL8,DUSP14,ECM1,FCGR3A/FCGR3B,GABRD,GUCY1A2,HRH1,ID3,IGF2,IL15RA,MR1,NMT2,PF4,SCG5,STX2,THBS1,TLR2,TOB1,TRPM2,VCAM1	32
Inflammatory Response, Organismal Injury and Abnormalities	Inflammation of organ	0.00392		0.803	AHNAK,C3,C3AR1,CBLB,CD1A,CD36,CDH1,CFB,CFH,CHRM5,CLEC4D,CSF1R,CST6,CXCL12,CXCL8,DUSP14,ECM1,FCGR3A/FCGR3B,GABRD,GADD45G,GUCY1A2,HRH1,ID3,IGF2,IL15RA,MCAM,MR1,NMT2,OSMR,PF4,RAB11B,SCG5,STX2,SYNE2,THBS1,TLR2,TOB1,TRPM2,VCAM1	39
Cardiovascular System Development and Function, Cellular Movement	Chemotaxis of vascular endothelial cells	0.00395			CD36,CXCL8,THBS1	3
Organismal Development	Morphology of body cavity	0.00399			ABCA3,ACVR2B,ARID3B,ATOH1,C3,C3AR1,CACNA1D,CADPS,CD36,CLEC4D,CSF1R,CXCL12,DMTF1,DUSP5,EFEMP1,ETS2,FETUB,FKBP1B,GADD45G,GRK5,HEG1,HIF1AN,HSPB8,ID3,IGF2,KLF15,LHX2,MMACHC,OSMR,PARD3,PBX1,PIGR,PRKCI,RGS6,SCARB1,SCG5,SRD5A1,STARD10,THBS1,TLR2,TRPM2,VCAM1	42
Organismal Injury and Abnormalities	Pathological Cyst	0.00402			CDH1,GADD45G,PARD3,PIGR,SALL2,SCARB1,TBC1D2,TOB1	8
Cancer, Organismal Injury and Abnormalities, Tumor Morphology	Invasion of tumor	0.00405		-1.089	CDH1,COL7A1,CST6,CTNND1,CXCL12,MCAM,NME1,PARD3,RALBP1,THBS1	10
Inflammatory Response	Immune response of cells	0.00407	Increased	2.297	ADGRB1,C3,C3AR1,CD36,CFH,CLEC6A,CSF1R,CXCL8,ETS2,FCGR3A/FCGR3B,HRH1,LTF,OSBP2,PF4,RALBP1,SCARB1,THBS1,TLR2,TRIM32,VCAM1	20
Embryonic Development, Nervous System Development and Function, Organ Development, Organismal Development, Tissue Development, Visual System Development and Function	Development of retina	0.00412			BBS4,ID3,LHX2,MITF,PRKCI,THBS1	6
Cell Cycle	S phase	0.00414		0.727	CDH1,CSF1R,CSTB,CTNND1,CXCL12,DMTF1,ID3,ING5,OSGIN1,PBX1,POLK	11
Cancer, Organismal Injury and Abnormalities	Genitourinary carcinoma	0.00417			AQP9,C3,CDH1,CFH,CSF1R,CTDSPL,ETS2,FAM20C,GABRD,ID3,ING5,KIF20B,MCAM,MITF,MTUS1,NOTCH4,PBX1,PF4,PRKCI,RALBP1,SEMA3C,SERPING1,SLC1A4,SLC45A3,THBS1,TLR2	26
Developmental Disorder, Organismal Injury and Abnormalities, Renal and Urological Disease	Congenital anomalies of kidney and urinary tract	0.00418			ACVR2B,ADAMTS2,CALD1,CYGB,IGF2,KIF7,MMACHC,PBX1,PIGR,SALL2,SEMA3C,SLIT3	12
Cell Signaling, Cellular Function and Maintenance, Molecular Transport, Vitamin and Mineral Metabolism	Flux of Ca2+	0.00418		1.625	C3,CACNA1D,CHRM5,CXCL12,CXCL8,ETS2,FCGR3A/FCGR3B,FKBP1B,GPR183,HRH1,TLR2,TRPM2	12
Cell Death and Survival	Cytolysis	0.00433		-0.465	ABCA3,ACVR2B,AQP9,C3,CFB,CFH,FCGR3A/FCGR3B,IL15RA,KIR3DL2,NME1,PF4	11
Organismal Injury and Abnormalities, Renal and Urological Disease	Failure of kidney	0.00435			C3,CACNA1D,CFB,CXCL8,FCGR3A/FCGR3B,GABRD,GUCY1A2,MR1,THBS1,TLR2	10
Cardiovascular System Development and Function, Organ Morphology, Organismal Development	Morphology of heart ventricle	0.00436			CACNA1D,CXCL12,DUSP5,FKBP1B,HSPB8,IGF2,KLF15,PBX1,THBS1,TLR2,TRPM2,VCAM1	12
Nervous System Development and Function, Neurological Disease	Abnormal regeneration by peripheral nervous system	0.0044			C3,CD36	2
Inflammatory Response	Antibody mediated rejection	0.0044			C1R,MR1	2
Cellular Movement	Cell movement of chronic lymphocytic leukemia cells	0.0044			CXCL12,CXCL8	2
Cell-mediated Immune Response, Cellular Movement, Hematological System Development and Function, Immune Cell Trafficking, Inflammatory Response, Lymphoid Tissue Structure and Development	Chemotaxis of Th1 cells	0.0044			CXCL12,CXCL8	2
Dermatological Diseases and Conditions, Immunological Disease, Organismal Injury and Abnormalities	Chronic idiopathic urticaria	0.0044			CHRM5,HRH1	2
Cellular Development, Hepatic System Development and Function	Differentiation of liver cell lines	0.0044			NOTCH4,STX2	2
Cardiovascular System Development and Function, Cellular Development, Organismal Development, Tissue Development	Differentiation of lymphatic endothelial cells	0.0044			ACVR2B,SPRED1	2
