# Supplementary material for: Subclinical endometritis in dairy cattle is associated with distinct mRNA expression patterns in blood and endometrium
Source: PLoS One. 2019 Aug 2;14(8):e0220244. doi: 10.1371/journal.pone.0220244 (PMC6677313; doi:10.1371/journal.pone.0220244)
Supplement: S13 Table — (XLSX) [file pone.0220244.s019.xlsx]

## Sheet: Feuil1
Upstream Regulator	Expr Fold Change	Molecule Type	Predicted Activation State	Activation z-score	p-value of overlap	Target molecules in dataset	Mechanistic Network
TGFB1		growth factor		1.073	2.44e-08	ADAMTS2, ADGRB1, AHNAK, AQP9, C1R, C2, C3, C3AR1, CALD1, CD36, CDH1, CFB, CFH, COL6A1, COL7A1, CSF1R, CTNND1, CXCL12, CXCL8, DOCK4, DSC2, ECM1, FCGR3A/FCGR3B, FETUB, GABRD, GATM, ID3, IGF2, IRAK2, ITPR2, KLF15, MITF, MPP6, MYOF, NFYC, NME1, PBX1, RYBP, SALL2, SCARB1, SCG5, SLIT3, SMURF1, SRM, SRR, TACC2, THBS1, TLR2, TPM2, ULK2, VCAM1, ZFYVE9	126 (15)
methotrexate		chemical drug		0.598	1.49e-07	C1R, C2, C3, CDH1, CFB, CFH, CXCL12, CXCL8, DUSP14, MITF, PBX1, SELENOP, SERPING1, THBS1, TOB1, VCAM1	113 (17)
etodolac		chemical drug			2.23e-06	CD36, CDH1, THBS1
poly rI:rC-RNA		biologic drug		1.766	2.39e-06	C2, C3, CD36, CDH1, CFB, CXCL8, CYP4F2, DUSP5, IL15RA, IRAK2, LTF, MEIS1, MRAS, OAS1, PIGR, SCARB1, SERPING1, THBS1, TLR2, VCAM1	121 (18)
OSM		cytokine		0.648	2.48e-06	AQP9, C1R, CDH1, COL6A1, COX6B1, CST6, CXCL12, CXCL8, DSC2, ECM1, ETS2, FETUB, GADD45G, IL15RA, NMT2, OAS1, OSMR, PIGR, SERPING1, TLR2, TULP3, VCAM1	115 (11)
BQ-788		chemical drug		0.762	5.72e-06	AQP9, CDH1, CTNND1, MCAM
TP53		transcription regulator		-1.485	1.28e-05	ACTL6A, ADGRB1, AKR1B1, ASTN2, C2, CARD10, CDH1, CDH10, CEP55, CSF1R, CSTB, CXCL12, CXCL8, DUSP5, FKBP1B, GADD45G, GATM, ID3, IGF2, IKBIP, KPNB1, MCAM, MYOF, NME1, OAS1, OSGIN1, PARD6B, POLK, POLR3E, PPFIBP1, RALBP1, SALL2, SCPEP1, SEMA3C, SERPING1, SIVA1, SMURF1, TACC2, THBS1, TOB1, ULK2	97 (10)
mir-126		microrna		-1.103	1.6e-05	CDH1, CXCL12, MITF, SPRED1, VCAM1	77 (7)
PTGER2		g-protein coupled receptor		1.065	7.36e-05	CDH1, CEP55, CLEC4D, CLEC6A, CSF1R, CXCL8, ECM1, THBS1
CD24		other			8.99e-05	CXCL8, DUSP5, ECM1, HSPB8, MCAM, MTUS1, SYNE2, THBS1
TNF		cytokine		1.572	0.000107	AKR1B1, ANK3, AQP9, C3, C3AR1, CD163L1, CD1A, CD36, CDH1, CFB, CPA3, CSF1R, CTDSPL, CXCL12, CXCL8, DSC2, DUSP14, DUSP5, GADD45G, ID3, IGF2, IL15RA, IRAK2, ITPR2, MCAM, NME1, NOTCH4, NUP98, OAS1, OSMR, PIGR, PLXDC2, SCARB1, SELENOP, SEMA3C, SLC11A2, SLC1A4, SMURF1, STARD3, THBS1, TLR2, VCAM1	119 (16)
IFNG		cytokine		1.32	0.000159	AQP9, C1R, C2, C3, CD163L1, CD36, CDH1, CFB, CSF1R, CXCL12, CXCL8, DUSP5, ETS2, FCGR3A/FCGR3B, IL15RA, IRAK2, MITF, MRAS, NUP98, OAS1, PF4, PIGR, RRAGD, SCARB1, SCG5, SELENOP, SERPING1, SLC11A2, SMC1B, SMURF1, THBS1, TLR2, VCAM1, XIST	115 (16)
PRKCD		kinase		0.436	0.000181	ARHGAP32, ARID3B, CXCL12, CXCL8, ETS2, HRH1, OAS1, RYBP, TLR2, VCAM1	103 (13)
gefitinib		chemical drug			0.000259	BDH2, C3, CDH1, CXCL8, LTF, NRP2, OSMR, PF4, TLR2	78 (7)
lipid A		chemical toxicant	Activated	2.236	0.000268	C2, C3, CD36, CXCL8, THBS1	113 (13)
EDN1		cytokine		1.488	0.000287	CDH1, COL7A1, CTNND1, CXCL8, ITPR2, MCAM, MITF, THBS1, TPM2, VCAM1	117 (14)
LPL		enzyme		-1.179	0.000298	CD36, CXCL8, SCARB1, THBS1, VCAM1	73 (9)
TREM1		transmembrane receptor		-0.906	0.000299	CD1A, CFB, CXCL8, DUSP14, ETS2, IL15RA, OSGIN1, SCG5, THBS1, TLR2	100 (10)
WNT1		cytokine		-0.707	0.000307	ATOH1, CDH1, ETS2, GADD45G, IGF2, MRAS, NOTCH4, SEMA3C
estrogen receptor		group		0.696	0.000336	C3, CALD1, CDH1, CDH10, COL6A1, COL7A1, CXCL12, CXCL8, DSC2, IGF2BP3, LTF
CHI3L1		enzyme			0.000345	CALD1, CDH1, COL6A1, CXCL8
DICER1		enzyme		1.941	0.000349	ARID3B, CAMK2A, CDH1, CXCL8, ID3, IGF2, IGF2BP3, MCAM, MITF, OAS1, SEMA3C, THBS1	98 (11)
VEGFA		growth factor		-0.115	0.000478	CD1A, COX6B1, CSTB, CXCL12, CXCL8, DUSP5, ETS2, ID3, NME1, NOTCH4, THBS1, VCAM1	114 (16)
miR-376a-3p (and other miRNAs w/seed UCAUAGA)		mature microrna		-0.894	0.000498	ARMC10, CD36, CHRM5, EVA1C, GRTP1, KLF15, LY6G6D, NFYC, NME1, NRXN1, OR6A2, OSMR, PARD6B, PLEKHA5, PRKCI, RYBP, TLR2, ZNF420, ZNF667, ZNF814
C20-D3-vitamin A		chemical drug			0.00051	C3, CFB
cibacron blue F 3GA		chemical reagent			0.00051	CXCL8, THBS1
17-alpha-ethinylestradiol		chemical drug		0.727	0.000584	AQP9, C3, CDH1, CSF1R, DSC2, NME1, SCARB1, VCAM1	111 (12)
CUX1		transcription regulator			0.000642	ARHGAP32, CDH1, HIF1AN, LTF, THBS1
di(2-ethylhexyl) phthalate		chemical toxicant	Activated	2	0.000828	ACMSD, CD36, CDH1, CXCL8, IRAK2
miR-155-5p (miRNAs w/seed UAAUGCU)		mature microrna		-1.009	0.000846	ARMC10, C2orf80, CACUL1, CARD10, CD36, CPA3, CSF1R, CXCL8, DMTF1, DUSP14, GATM, IGF2, LDLRAD3, MEIS1, MITF, OOEP, PRKCI, SPRED1, SYNE2, TRIM32
U0126		chemical - kinase inhibitor		-1.577	0.000857	ALPK3, C3, CD36, CDH1, CSF1R, CXCL8, CYP4F2, DMTF1, DUSP5, OSMR, SCG5, THBS1, TLR2, TPM2, TULP3, VCAM1	114 (15)
miR-3678-5p (miRNAs w/seed CCGUACA)		mature microrna		1.667	0.000873	ATP6AP1L, CARD10, GALNT2, NFYC, PIGR, SELENOP, TTC5, VCAM1, ZSCAN12
CSF1		cytokine		0.447	0.000873	CD163L1, CD1A, CSF1R, DUSP5, ETS2, FCGR3A/FCGR3B, THBS1, TLR2, VCAM1	120 (17)
monensin		chemical - endogenous non-mammalian			0.000904	CXCL8, THBS1, TRPM2
miR-598-3p (miRNAs w/seed ACGUCAU)		mature microrna		-1.32	0.000929	ADAMTS2, CD1A, CLEC6A, FCGR3A/FCGR3B, GPR183, PPFIBP1, SCRN1, SEPHS2, TRAPPC13, ULK2
ERBB2		kinase		0.522	0.000975	AHNAK, APLP2, CD36, CDH1, COL6A1, COL7A1, CSF1R, CXCL12, CXCL8, HSPB8, IGF2, ITPR2, MITF, NOTCH4, PBX1, POLK, POLR1D, POLR3E, SCARB1, SCG5, THBS1	99 (11)
miR-1180-3p (miRNAs w/seed UUCCGGC)		mature microrna		0.905	0.000982	APLP2, DNAH7, DNAJC22, DOCK3, GGACT, HSPBAP1, ID3, PIGS, SLC1A4, SLIT3, TMTC2
KLF2		transcription regulator		-0.797	0.000993	CD1A, CD36, CXCL8, ECM1, ID3, IGF2, THBS1, VCAM1
P2RY6		g-protein coupled receptor			0.00101	CXCL8, VCAM1
MPP5		kinase			0.00101	CDH1, PARD3
cholesterol ester		chemical - endogenous mammalian			0.00101	CD36, SCARB1	27 (4)
SOX2		transcription regulator		-0.696	0.00101	CSF1R, CST6, DUSP5, EFEMP1, ETS2, LHX2, MEIS1, NOTCH4, NUDT21, PARD6B, TEAD3, TULP3
SB203580		chemical - kinase inhibitor	Inhibited	-2.223	0.00103	AQP9, C3, C3AR1, CD1A, CDH1, CXCL8, EFEMP1, ETS2, MITF, SERPING1, THBS1, TLR2, VCAM1	119 (17)
POU2F1		transcription regulator			0.0011	AOX1, CSF1R, CXCL8, GSTM3, SELENOP, SERPING1, VCAM1
GDF2		growth factor		0.1	0.00113	CXCL12, CXCL8, HSPB8, ID3, SEMA3C, VCAM1
miR-3689a-5p (and other miRNAs w/seed GUGAUAU)		mature microrna		-0.535	0.00113	AOX1, ARMC10, ASB11, CALD1, CD163L1, MPP6, NRXN1, ORC3, OSBPL6, OSMR, POLK, PTER, SPRED1, STX2
Akt		group		0.925	0.00114	CD36, CDH1, CXCL12, CXCL8, IGF2, MCAM, NRP2, SCARB1, THBS1, TLR2, VCAM1	96 (10)
D-glucose		chemical - endogenous mammalian		0.777	0.00116	AKR1B1, C3, CACNA1D, CALD1, CD36, CXCL8, ERFE, IGF2, ITPR2, MCAM, NRXN1, NUP98, SELENOP, SEPHS2, SRM, THBS1, TLR2, VCAM1	129 (17)
PDGF BB		complex		0.629	0.00119	C3, CALD1, CSF1R, CXCL8, DUSP5, ETS2, GPR183, ID3, IGF2, THBS1, TOB1, VCAM1	109 (12)
miR-6719-3p (miRNAs w/seed CUGACAU)		mature microrna		-1.546	0.00127	ARHGAP32, CACUL1, CLEC4D, CXCL12, FAM208B, FCGR3A/FCGR3B, GUCY1A2, HIST1H2AA, KRT80, PARD3, PDF, PRTG, SLC11A2, TEX29, TMEM232, ZNF667
tetrachlorodibenzodioxin		chemical toxicant		-1.941	0.00128	ACTL6A, ATOH8, CACNA1D, CD36, COL6A1, CXCL8, DSC2, ETS2, GABRD, IGF2, NME1, NMT2, PF4
vitamin E		chemical drug	Inhibited	-2.2	0.00132	CD36, CDH1, SCARB1, SLC11A2, VCAM1	92 (10)
miR-6886-3p (miRNAs w/seed GCCCUUC)		mature microrna		-0.218	0.00146	ALPK3, DCX, HMGN5, KIF7, KIFC2, KLF15, KRT80, LDLRAD3, MCAM, MRAS, OSBP2, POLR3E, RGS6, RGSL1, SALL2, SLIT3, SNX33, TMTC2, TTC38, ZNF205, ZNF280B
S100A4		other		1	0.00151	CDH1, PF4, THBS1, VCAM1	87 (9)
NEUROG1		transcription regulator		-0.447	0.00163	C3, CFH, DCX, THBS1, TMTC2
HTR4		g-protein coupled receptor			0.00167	CXCL12, VCAM1	66 (7)
miR-1273g-5p (miRNAs w/seed GUGGUUG)		mature microrna		0.277	0.0017	C2orf80, CALD1, CDHR5, CORO2A, EFEMP1, FCGR3A/FCGR3B, FKBP1B, HSPB8, HSPBAP1, IGF2, LHX2, MEIS1, MRAS
ATP-gamma-S		chemical reagent			0.00186	C3, CSF1R, CXCL8, IL15RA, THBS1	102 (10)
CSF3		cytokine		-0.579	0.00201	C3AR1, CXCL12, CXCL8, GADD45G, GPR183, LTF, TLR2, VCAM1	108 (13)
FANCC		other			0.00212	AQP9, CXCL12, MYOF, OAS1, TBC1D9
F10		peptidase			0.00216	CXCL8, DUSP14, VCAM1	43 (5)
SERPINA1		other			0.00219	CD36, CXCL8, SCARB1, TLR2	92 (9)
NFKB2		transcription regulator			0.00226	AKR1B1, CXCL12, CXCL8, GPR183, VCAM1	87 (7)
mir-29		microrna		0.739	0.00241	AOX1, CDH1, CTNND1, SCARB1, THBS1	77 (7)
VIPAS39		other			0.00248	PF4, THBS1
Fibrinogen		complex			0.00249	CXCL8, FCGR3A/FCGR3B, TLR2	77 (8)
EDN3		other			0.00249	CDH1, CTNND1, MCAM	39 (4)
tranilast		chemical drug			0.00249	CDH1, CXCL8, VCAM1	105 (12)
MYC		transcription regulator		-0.584	0.00259	ATOH1, CDH1, COX6B1, CST6, CSTB, CTDSPL, CXCL8, DUSP5, ECM1, EFEMP1, GADD45G, ID3, MITF, NME1, NUDT21, OAS1, PHF21A, SCARB1, SCPEP1, SEPHS2, SRD5A1, SRM, THBS1, TOB1, VCAM1, XIST	90 (9)
TICAM1		other		1.912	0.00274	CFB, CXCL8, ETS2, IL15RA, ITPR2, TLR2, VCAM1	100 (11)
CpG oligonucleotide		chemical drug		1.89	0.00274	C2, CD36, CLEC4D, CXCL8, ETS2, THBS1, TLR2	127 (15)
Creb		group		0.239	0.00282	ACVR2B, ANK3, C3AR1, CDH10, CSF1R, CXCL8, GSTM3, HSPB8, MCAM, MITF, PPFIBP1
TERF2IP		other			0.00286	CXCL8, IGF2, SLIT3
SMARCA4		transcription regulator		0.368	0.00287	AHNAK, CD163L1, CDH1, COL7A1, CYB5R2, DYNC1H1, ETS2, GADD45G, GPR183, ID3, IL15RA, NRP2, RALBP1, SCG5, SELENOP, STARD10, TLR2
PPARA		ligand-dependent nuclear receptor		0.198	0.00289	AQP9, C1R, C2, C3, CD36, CFH, CXCL12, ECI2, GSTM3, SCARB1, SRM, TLR2, TMTC2, VCAM1	106 (11)
Histone h3		group			0.00295	ADGRB1, ATOH1, CDH1, CSF1R, CXCL8, ING5, MEIS1, MTUS1, OSGIN1, SCARB1, SYNE2, TACC2, TLR2, ZNF420
PROC		peptidase		-1.131	0.00307	CXCL8, THBS1, TLR2, VCAM1	102 (11)
BMPR2		kinase			0.00325	CXCL12, CXCL8, SEMA3C	103 (11)
miR-142-3p (and other miRNAs w/seed GUAGUGU)		mature microrna		-0.5	0.00328	ABHD11, ANK3, CCDC94, CTNND1, DMTF1, ECI2, FAM208B, GRTP1, IKBIP, MON2, MTUS1, PARD6B, PTER, SEMA3C, SPRED1, STX2
miR-1299 (miRNAs w/seed UCUGGAA)		mature microrna		-1.279	0.0034	ACTL6A, C3AR1, CALD1, CD300LB, CDH1, CLEC4D, CTDSPL, CXCL8, CYP4F2, DCX, EFEMP1, GATM, IGF2BP3, MYL12B, NRP2, OAS1, OSGIN1, PIGS, POLR1D, PRTG, SELENOP, SLC28A3
LPAR2		g-protein coupled receptor			0.00345	CXCL8, SIVA1
15-E2-isoketal modified phosphatidylethanolamine		chemical reagent			0.00345	CXCL8, VCAM1
vinpocetine		chemical drug			0.00345	CXCL8, VCAM1	52 (6)
miR-1839-5p (and other miRNAs w/seed AGGUAGA)		mature microrna		0.447	0.00348	ACTL6A, AQP9, ARMC10, BBS4, C2, CCDC141, CEP55, CYP4F2, DMAC1, ERFE, GATM, GGACT, LHX2, MTUS1, RALBP1, SRD5A1, TEAD3, TMEM35B, TPM2, ZSCAN12
GPS2		transcription regulator	Inhibited	-2	0.00358	CXCL8, FAM20C, TBC1D2, VCAM1
ETV5		transcription regulator			0.00358	CDH1, CXCL12, KRT80, PKP4
dexamethasone phosphate		chemical drug			0.00368	GADD45G, ID3, THBS1
GRHL2		transcription regulator			0.00368	CDH1, NRP2, SEMA3C	5 (2)
PSMD10		transcription regulator			0.00368	CDH1, CXCL8, MRAS	75 (7)
MECOM		transcription regulator			0.00368	GADD45G, ITPR2, PBX1
TRPV4		ion channel			0.00368	THBS1, TLR2, VCAM1
ZEB1		transcription regulator			0.00386	ABCA3, CDH1, NRP2, OAS1
WT1		transcription regulator		-0.607	0.0041	APLP2, CDH1, CSF1R, IGF2, NME1, NUP98, SALL2, THBS1, ZNF280B
IKBKB		kinase		1.196	0.00414	C3, CBLB, CDH1, CSF1R, CXCL12, CXCL8, GRK5, SEMA3C, SMURF1, VCAM1	117 (16)
inosine		chemical - endogenous mammalian		1.067	0.00446	C2, C3, CFB, SERPING1
CAT		enzyme		-1	0.00446	CD36, CXCL8, THBS1, VCAM1	125 (15)
miR-3907 (miRNAs w/seed GGUGCUC)		mature microrna		-0.447	0.00454	AQP9, ARID3B, CCDC92, CFH, CPA3, CTDSPL, CYB5R2, FOXRED1, KNOP1, MCAM, MEIS1, OSBP2, OSGIN1, OSMR, PIGQ, SCRN1, SNX33, THBS1, YTHDC2, ZBTB40
ganglioside GM3		chemical - endogenous mammalian			0.00456	CD1A, VCAM1
SENP7		peptidase			0.00456	CDH1, CXCL8
IL1RL2		transmembrane receptor			0.00456	CD1A, CXCL8
PRMT6		enzyme			0.00456	CTNND1, THBS1
CYSLTR2		g-protein coupled receptor			0.00456	CXCL8, MITF
LPA		other			0.00456	CXCL8, VCAM1
FBLN5		other			0.00456	CDH1, CEP55
polymyxin B		biologic drug			0.00456	CXCL8, VCAM1	55 (5)
palmitoyl-Cys((RS)-2,3-di(palmitoyloxy)-propyl)-Ala-Gly-OH		chemical reagent			0.00456	CXCL8, TLR2	66 (7)
TWIST1		transcription regulator		1.327	0.0046	C3, CDH1, COL6A1, CXCL12, CXCL8, HEG1, SLC28A3
miR-513b-3p (miRNAs w/seed AAUGUCA)		mature microrna		-0.775	0.0046	ASTN2, CADPS, CCDC141, CDH10, CXCL12, CYP4F2, EFEMP1, GGACT, IKBIP, LDLRAD3, MEIS1, MYRFL, OSMR, PARD3, POLR1D
miR-708-3p (miRNAs w/seed AACUAGA)		mature microrna		0.577	0.0046	CYGB, DYNLT1, LDLRAD3, NME1, POLR1D, PTER, SCRN1, SERPING1, SMC1B, SPRED1, TLR2, ZNF280B
RCAN1		transcription regulator			0.00464	CD36, CXCL8, VCAM1	69 (7)
SGPP2		phosphatase			0.00464	CDH1, DNAJC22, HSPB8
miR-567 (miRNAs w/seed GUAUGUU)		mature microrna		-1.437	0.00476	ASB11, ATXN10, CEP162, CLEC4D, CXCL8, FCGR3A/FCGR3B, GATM, GPR183, IKBIP, KIR3DL2, MR1, NRXN1, SMC1B
Immunoglobulin		complex		-1.67	0.00482	AQP9, C3AR1, CDH1, CSF1R, CXCL8, ETS2, FCGR3A/FCGR3B, TLR2, VCAM1	115 (16)
TP73		transcription regulator		-0.829	0.00492	C1R, C3, CDH1, FKBP1B, GRK5, HSPB8, SERPING1, SYNE2, THBS1, TRIM32, ULK2
LDL		complex		0.989	0.00508	C3, CD36, CXCL8, GPR183, ITPR2, NME1, OSBPL6, SCARB1, VCAM1	112 (15)
miR-542-3p (miRNAs w/seed GUGACAG)		mature microrna		0.943	0.00515	ASB11, CACUL1, CPSF4, CST6, FKBP1B, HSPBAP1, NOTCH4, NRP2, OSMR, PLXDC2, POU6F2, PTER, RALBP1, SEMA3C, SPRED1, TMEM35B, ZCCHC17, ZSCAN12
PI3K (complex)		complex		0.853	0.00527	ATOH1, CDH1, CXCL8, HIF1AN, IGF2, MCAM, MITF, NME1, THBS1, VCAM1	105 (13)
miR-423-3p (miRNAs w/seed GCUCGGU)		mature microrna		-0.577	0.00531	CAMK2A, CCDC92, CPSF4, HCFC1, ING5, MEIS1, MYOF, PANX2, POLR1D, STARD3, TRPM2, ZNF667
miR-6772-3p (miRNAs w/seed UGCUCCU)		mature microrna		-0.229	0.00545	ATP6AP1L, CAMK2A, CDH1, CDH10, CYB5R2, DCX, DMTF1, ERFE, FAM208B, GABRD, GUCY1A2, IKBIP, IL15RA, ING5, KIAA2013, LY6G6D, MEIS1, NFYC, SEPHS2
sphingosine-1-phosphate		chemical - endogenous mammalian		-0.277	0.0055	CD36, CDH1, CXCL8, THBS1, VCAM1	116 (17)
IL7R		transmembrane receptor			0.0055	APLP2, ARHGAP32, CXCL8, ETS2, VCAM1
NFKBIA		transcription regulator		-0.432	0.00553	C3, CARD10, CDH1, CXCL12, CXCL8, GADD45G, GRK5, IGF2, IL15RA, MR1, SEMA3C, TLR2, VCAM1	104 (13)
SOD1		enzyme			0.00565	CD36, CSF1R, ETS2, GSTM3, HSPB8, SCG5, SLC11A2, VCAM1
miR-34a-5p (and other miRNAs w/seed GGCAGUG)		mature microrna		0.111	0.00568	ANK3, CSF1R, CTDSPL, DCX, ECHDC3, ERFE, FETUB, FKBP1B, GP5, HCFC1, IGF2BP3, IKBIP, IRAK2, KIR3DL2, KNOP1, LHX2, LTF, MRAS, MTUS1, NMT2, NOTCH4, PARD6B, PIGQ, PKP4, PLEKHA5, PTPN18, SLIT3, SRR, STARD3, TBC1D2, TEX264, TRIM32, TTC38, VCAM1, ZCCHC17
JAK2		kinase		1.131	0.00571	CD36, CDH1, CXCL8, OSMR, THBS1, XIST	100 (12)
DNMT3A		enzyme		-0.555	0.00571	CAMK2A, CDH1, CSF1R, EFEMP1, PRKCI, SLIT3
FBXO42		other			0.00581	CXCL8, VCAM1
TENM1		transmembrane receptor			0.00581	SCARB1, SLC1A4
PLA2G1B		enzyme			0.00581	CD36, CXCL8	75 (7)
CTNND1	1,309	other			0.00581	CDH1, CXCL8
IL4I1		enzyme			0.00581	CXCL8, TOB1
hexamethoxyflavone		chemical toxicant			0.00581	CXCL8, VCAM1	75 (7)
FN1		enzyme		1.967	0.00581	APLP2, CDH1, CXCL8, IGF2BP3, RRAGD, SCRN1, THBS1, TLR2	111 (15)
IL1B		cytokine		0.988	0.00581	AKR1B1, C1R, C3, CFB, CXCL12, CXCL8, DUSP5, ETS2, ID3, IL15RA, IRAK2, OSMR, PIGR, PLXDC2, SCARB1, SELENOP, SLC11A2, THBS1, TLR2, TOB1, VCAM1	115 (15)
miR-3558-3p (and other miRNAs w/seed CUGUGGA)		mature microrna		-0.218	0.00581	AKR1B1, AOX1, ATP6AP1L, BBS4, BDH2, CTDSPL, CXCL12, CXCL8, CYP4F2, DCX, DMAC1, HEG1, HSPB8, MTUS1, NRXN1, RALBP1, RGS6, SLC28A3, TBC1D2, TULP3, ZBTB40
miR-1973 (miRNAs w/seed CCGUGCA)		mature microrna		0	0.00586	ANK3, CACUL1, CXCL8, DCX, GALNT2, KPNB1, POLR3E, RAB11B, SEPHS2, TBC1D2, TMTC2, TOB1
ERBB3		kinase		-0.47	0.00605	CDH1, COL6A1, CXCL12, IGF2, THBS1	99 (12)
miR-4684-3p (miRNAs w/seed GUUGCAA)		mature microrna		-1.5	0.00609	CCDC141, CD36, CORO2A, FCGR3A/FCGR3B, HRH1, MYRFL, OSBP2, PARD6B, PLXDC2, POLK, SCARB1, SEPHS2, SLC28A3, SPRED1, ZCCHC17, ZNF667
simvastatin		chemical drug		-0.655	0.00615	ACMSD, CALD1, CDH1, CXCL8, MPP6, SCARB1, TLR2, VCAM1	114 (16)
CDX2		transcription regulator		-0.555	0.00617	ATOH1, CDH1, CDHR5, MTUS1, PARD3, PARD6B
CD14		transmembrane receptor		1.253	0.00623	CXCL12, CXCL8, TLR2, VCAM1	111 (17)
TCL1A		transcription regulator			0.00635	C3AR1, CLEC4D, CLEC6A, CPA3, LTF
KLF4		transcription regulator		0.189	0.0064	CDH1, CSF1R, CST6, CXCL8, DUSP5, EFEMP1, ID3, NOTCH4, NUDT21
camptothecin		chemical drug		0.239	0.00647	CTNND1, CXCL8, GADD45G, GRK5, ID3, IL15RA, PARD3, PBX1, PHF21A, PRKCI, RALBP1, RRAGD, SIVA1, TLR2, TOB1, VCAM1	61 (5)
AR		ligand-dependent nuclear receptor		-1.009	0.00652	C3, CAMK2A, CDH1, CXCL12, ETS2, IGF2, MRAS, PIGR, SLC45A3, SRD5A1, TACC2, TEAD3, THBS1	78 (7)
IRF1		transcription regulator		0.865	0.00663	C1R, CFB, CXCL8, OAS1, PF4, PIGR, VCAM1	69 (6)
ESR1		ligand-dependent nuclear receptor		-0.434	0.00671	ABCA3, AHNAK, ANK3, AQP9, C3, CACNA1D, CALD1, CDH1, CXCL12, CXCL8, DOCK4, DUSP5, EFEMP1, IGF2, IRAK2, KPNB1, LTF, MR1, NME1, PRKCI, SCARB1, SEMA3C, SLC1A4, SMURF1, SRM, STARD3, TOB1, TRPM2	112 (15)
TNFSF11		cytokine		1.97	0.00689	AQP9, C3AR1, CD1A, CSF1R, CXCL8, IL15RA, SLC11A2, TLR2, VCAM1	117 (17)
CARD9		other			0.00697	C3, CLEC6A, TLR2	56 (5)
CTBP1		enzyme			0.00697	CDH1, CSF1R, THBS1
miR-4755-3p (miRNAs w/seed GCCAGGC)		mature microrna		1	0.00716	ABHD11, ADGRB1, ALPK3, C2orf68, CCDC141, CDH1, CPSF4, CYGB, DNAH7, DNAJC22, ECHDC3, FOXRED1, GALNT2, GP5, HCFC1, HSPB8, ING5, IRAK2, KRT78, MCAM, MRAS, OSBP2, PARD3, PBX1, PIGQ, PIGR, POLR1D, PPFIBP1, SEMA3C, SNX33, STARD10, TEAD3, TRPM2, TTC5, TULP3, ZBTB40
6-mercaptopurine		chemical drug			0.0072	CXCL8, VCAM1
NFKBIE		transcription regulator			0.0072	CXCL8, VCAM1
HBB		transporter			0.0072	CXCL8, VCAM1
miR-291a-3p (and other miRNAs w/seed AAGUGCU)		mature microrna		-1.264	0.00744	AHNAK, C3, CACUL1, CDH1, CEP55, CLEC4D, CPA3, CXCL8, GSTM3, HIF1AN, IRAK2, MTUS1, MYL12B, POLK, RRAGD, SEMA3C, SMYD2, TBC1D2, TMTC2, TPM2, ZNF362
emodin		chemical drug			0.00749	CDH1, CSF1R, CXCL8, VCAM1	72 (7)
E. coli B5 lipopolysaccharide		chemical - endogenous non-mammalian		0.6	0.0076	CXCL8, ETS2, IL15RA, PF4, SELENOP, SEPHS2, SLC11A2, THBS1, TLR2	119 (17)
TNFSF14		cytokine			0.00765	CDH1, CXCL12, VCAM1	118 (17)
ETV4		transcription regulator			0.00765	ARID3B, CDH1, CXCL8
PAK1		kinase			0.00765	CDH1, CTNND1, SCARB1	76 (7)
F2		peptidase		1.239	0.00778	AKR1B1, CALD1, CXCL8, GABRD, IL15RA, SRM, THBS1, VCAM1, ZNF205	116 (14)
fluticasone propionate		chemical drug		1.813	0.00798	AQP9, C3, CD36, CFB, CXCL8, SELENOP, THBS1
resiquimod		chemical drug		1.506	0.00798	CSF1R, CXCL12, CXCL8, ETS2, IRAK2, TLR2, TRPM2	114 (16)
IL10RA		transmembrane receptor		0	0.00809	ATOH1, C3, CD36, CFB, ECM1, EFEMP1, IL15RA, PF4, TLR2, TRPM2
miR-875-3p (miRNAs w/seed CUGGAAA)		mature microrna		-1.414	0.00815	ACTL6A, CLEC4D, CTDSPL, CYP4F2, ECI2, GATM, GRTP1, MR1, MYL12B, NRP2, PF4, PIGS, PLEKHA5, PRTG, RYBP, SELENOP, SMURF1, STX2
mir-223		microrna		-0.239	0.00827	CD36, FAM20C, MYOF, SCARB1, SLC11A2, TOB1
miR-182-5p (and other miRNAs w/seed UUGGCAA)		mature microrna		-0.837	0.00832	ANK3, AQP9, ATOH8, CCDC92, CD1A, CDH1, CHRM5, CTDSPL, DCX, DOCK4, GADD45G, GPR183, HIF1AN, KLF15, MITF, OAS1, OOEP, PARD3, PHF21A, POU6F2, SEPHS2, SPAG17, SYNE2, THBS1, TOB1, ZNF280B
PRKCZ		kinase			0.00836	CXCL8, HIF1AN, VCAM1	98 (14)
RAD21		transcription regulator			0.00836	CXCL12, IGF2, THBS1
parthenolide		chemical drug			0.00836	CXCL8, MITF, VCAM1	56 (5)
TAZ		enzyme			0.00842	AOX1, MYOF, SCG5, SEMA3C
Mek		group		1.254	0.00852	CD36, CDH1, CSF1R, CXCL8, DUSP5, HRH1, SEMA3C, THBS1	94 (11)
F2R		g-protein coupled receptor		1.262	0.00869	CDH1, CXCL12, CXCL8, THBS1, VCAM1	119 (15)
Adaptor protein 2		complex			0.00872	CDH1, PIGR
trypsin		group			0.00872	CDH1, CXCL8	58 (7)
ABCA4		transporter			0.00872	C3, CFB
APOA2		transporter			0.00872	CXCL8, SCARB1
theophylline		chemical drug			0.00872	CXCL8, THBS1	45 (5)
Fgf		group			0.00911	CDH1, MITF, VCAM1	90 (10)
SMAD7		transcription regulator		-0.816	0.00918	ACVR2B, ADAMTS2, COL6A1, EFEMP1, ID3, TPM2
miR-627-3p (miRNAs w/seed CUUUUCU)		mature microrna		-0.5	0.0092	CDH1, CEP162, CEP55, CLEC4D, DCX, DMTF1, GGACT, GRK5, NMT2, NUDT21, OOEP, SLC11A2, SPRED1, TMEM232, TMEM35B, ZNF667
ACVRL1		kinase			0.00989	CXCL12, CXCL8, VCAM1
miR-4798-3p (miRNAs w/seed ACUCACG)		mature microrna		0.302	0.01	ARID3B, DYNLT1, GALNT2, LDLRAD3, MEIS1, ORC3, PANX2, PARD3, SCRN1, ZNF280B, ZSCAN12
miR-31-5p (and other miRNAs w/seed GGCAAGA)		mature microrna		0.239	0.0101	AKR1B1, ARHGAP32, C2orf80, CCDC92, CD1A, CHRM5, CXCL12, CXCL8, DCX, GP5, GPR183, HIF1AN, KRT80, OAS1, OSBPL5, OSMR, POLK, SALL2, SEPHS2, SLC1A4, SMC1B, SRD5A1, TACC2, TEAD3
TGM2		enzyme	Activated	2.157	0.0102	AQP9, C3, CD36, CXCL8, MPP6, OAS1, ORC3, THBS1
IL17A		cytokine		1.517	0.0102	C3, CXCL12, CXCL8, HSPB8, ITPR2, OSMR, TLR2, VCAM1
MGEA5		enzyme		1.155	0.0102	C3AR1, CADPS, CD36, CDH1, CSF1R, CXCL8, GADD45G, IGF2, IGF2BP3, MCAM, THBS1, ZMYND10
Il8r		group			0.0104	CDH1, CXCL8
CLEC1B		transmembrane receptor			0.0104	CXCL12, PF4
AURKA		kinase			0.0104	CDH1, XIST
mir-373		microrna			0.0104	CDH1, CXCL8
HSPB8	-2,099	kinase			0.0104	CXCL8, MITF
CXCL1		cytokine			0.0104	CLEC6A, MRAS
rhein		chemical - endogenous non-mammalian			0.0104	CXCL8, VCAM1
palmitic acid		chemical - endogenous mammalian		1.644	0.0104	CD36, CXCL8, CYP4F2, IRAK2, SCARB1, TLR2, VCAM1
FAS		transmembrane receptor			0.0104	COL6A1, CTNND1, CXCL8, GADD45G, GRK5, IL15RA, PRKCI, RALBP1, RRAGD, TLR2, VCAM1
triptolide		chemical drug			0.0105	CDH1, CXCL12, CXCL8, TLR2
IL4		cytokine	Activated	2.332	0.0108	AHNAK, C3, CD163L1, CD1A, CD36, CSF1R, CXCL8, DYNC1H1, FCGR3A/FCGR3B, GADD45G, GATM, GP5, HRH1, IL15RA, LDLRAD3, MYOF, PIGR, SRM, TLR2, VCAM1
caffeine		chemical drug		0.849	0.011	CDH1, CXCL8, MITF, THBS1
miR-1255b-5p (and other miRNAs w/seed GGAUGAG)		mature microrna		-1.789	0.0111	ABCA3, ARMC10, CADPS, CPSF4, CSF1R, CXCL12, CYGB, FKBP1B, HMGN5, IL15RA, KRT78, MYOF, SELENOP, SLC45A3, STX2, TEAD3, TPM2, TRPM2, ZNF420, ZNF667
miR-6882-3p (miRNAs w/seed GCUGCCU)		mature microrna		-0.408	0.0113	ARID3B, ART5, BBS4, C2, CAMK2A, CPSF4, DCX, EFEMP1, FCGR3A/FCGR3B, GATM, HEG1, HSPBAP1, KIAA1549L, KNOP1, KPNB1, MCAM, MR1, PBX1, PIGS, PRKCI, SNX33, SPRED1, ZCCHC17, ZNF362
miR-6798-3p (miRNAs w/seed UACCCCC)		mature microrna		0	0.0113	ANK3, C2orf68, CDH1, CEP162, CTDSPL, DCX, ETS2, FCGR3A/FCGR3B, HSPB8, LDLRAD3, MITF, MTUS1, PDF, POLR1D, SNX33, TTC5
methylprednisolone		chemical drug		1.45	0.0115	CACNA1D, CBLB, CDH1, DSC2, GATM, ID3, KLF15, NME1, PIGR, PTER, SEPHS2, TLR2, TOB1, VCAM1
miR-2117 (miRNAs w/seed GUUCUCU)		mature microrna		0	0.0115	BBS4, CADPS, CBLB, DNAJC22, EMC4, ERFE, GGACT, GPR183, MEIS1, POU6F2, PTER, SCARB1, SLC11A2, TMEM232, TMTC2, ZNF667
miR-7162-3p (miRNAs w/seed CUGAGGU)		mature microrna		0	0.0115	AQP9, ARID3B, COL6A1, CTNND1, CXCL12, DCX, DUSP5, ERFE, GALNT2, IRAK2, KIR3DL2, OSMR, TACC2, TEAD3, TPM2, TTC38
SAA		group			0.0116	CXCL8, TLR2, VCAM1
ROCK2		kinase			0.0116	CXCL8, DSC2, VCAM1
C3	2,128	peptidase		1.962	0.0116	C3, C3AR1, CDH1, CXCL8
F3		transmembrane receptor		1.954	0.0116	CXCL8, DOCK4, EFEMP1, VCAM1
PTPN11		phosphatase			0.0116	ABCA3, CSF1R, CXCL8, LTF
PARP1		enzyme	Activated	2.213	0.012	ATXN10, CDH1, CXCL12, HRH1, VCAM1
miR-2681-5p (miRNAs w/seed UUUUACC)		mature microrna		-0.447	0.012	HIST1H2AA, IKBIP, LHX2, RGS6, TRAPPC13
miR-4766-5p (and other miRNAs w/seed CUGAAAG)		mature microrna		-0.302	0.0121	ACTL6A, AQP9, CCDC141, CPA3, CSTB, GGACT, GUCY1A2, HMGN5, PRKCI, RYBP, ZNF667
ORMDL3		other			0.0122	CXCL8, OAS1
NBEAL2		other			0.0122	PF4, THBS1
spermine nitric oxide complex		chemical toxicant			0.0122	CXCL8, VCAM1
ethylenediaminetetraacetic acid		chemical drug			0.0122	CXCL8, MCAM
palmitoleic acid		chemical - endogenous mammalian			0.0122	MITF, VCAM1
cyclomaltodextrin		chemical drug			0.0122	MITF, SCARB1
auranofin		chemical drug			0.0122	C3, CXCL8
miR-491-5p (and other miRNAs w/seed GUGGGGA)		mature microrna		0.632	0.0122	ADGRB1, ARID3B, ASB11, ATOH8, CAMK2A, CD300LB, CHRM5, COL6A1, COX6B1, CYGB, ERFE, GALNT2, HEATR1, HRH1, IGF2, LHX2, MEIS1, MRAS, MRPS35, OSBP2, OSBPL5, PARVB, PRKCI, RAB11B, RALBP1, RGS6, SLC28A3, SLC45A3, SLIT3, SNX33, SRD5A1, TBC1D2, TEAD3, TPM2, TTC38, TULP3, ZNF280B, ZNF362, ZNF814, ZSCAN12
HTT		transcription regulator		-1.664	0.0122	ADAMTS2, C1R, CAMK2A, CDHR5, COL6A1, CSF1R, DUSP5, GABRD, GADD45G, GRK5, IGF2, LTF, MCAM, SELENOP, SERPING1, SRM, VCAM1
miR-3145-3p (miRNAs w/seed GAUAUUU)		mature microrna		0	0.0123	ACMSD, ARMC10, ASB11, CCDC141, CXCL8, DNAJC22, DOCK4, GUCY1A2, IKBIP, NRXN1, PPFIBP1, PRTG, SMC1B, TOB1
SMAD3		transcription regulator		1.231	0.0124	C3, CDH1, COL6A1, COL7A1, DOCK4, ID3, THBS1, TPM2
ONECUT1		transcription regulator			0.0125	ARHGAP32, C2, CACNA1D, CD36, CYGB, FAM117A, MEIS1, MYOF, PPFIBP1
PGF		growth factor			0.0125	CXCL8, ETS2, NRP2
LRP1		transmembrane receptor			0.0125	C1R, CDH1, SERPING1
TNFSF12		cytokine		1.039	0.0125	CLEC4D, CXCL8, KLF15, PF4, VCAM1
HNF4A		transcription regulator		-0.522	0.0126	ACMSD, ADGRB1, AHNAK, AKR1B1, AQP9, C2, C3, CCDC94, CDH1, CXCL8, CYP4F2, DSC2, ECI2, FAM117A, FETUB, FOXRED1, GADD45G, HIF1AN, KLF15, KPNB1, LTF, MRPS35, NME1, ORC3, OSMR, PANX2, PIGS, POLR3E, PPFIBP1, PTPN18, SCAND1, SCARB1, SEMA3C, SRR, STARD10, TEAD3, TRAPPC13, TTC38, ZNF133
miR-345-5p (and other miRNAs w/seed CUGACCC)		mature microrna		0	0.0126	ARMC10, BBS4, CTDSPL, DCX, DOCK3, DUSP5, ECM1, GALNT2, GSTM3, HRH1, KPNB1, POLR3E, SNX33, TEAD3, TMEM35B, TTC38
miR-451b (miRNAs w/seed AGCAAGA)		mature microrna		0.258	0.0129	AQP9, CCDC141, CPA3, CXCL12, CXCL8, CYGB, DSC2, FKBP1B, GSTM3, KIR3DL2, MITF, MMACHC, SEPHS2, TACC2, TEX264
propylthiouracil		chemical drug			0.013	ABCA3, CDH1, DCX, IGF2, ULK2
ricinoleic acid		chemical - endogenous non-mammalian			0.0131	VCAM1
Rp-8-CPT-cAMPS		chemical - kinase inhibitor			0.0131	SCARB1
colfosceril palmitate		chemical - endogenous mammalian			0.0131	CXCL8
cyanuric acid		chemical reagent			0.0131	CXCL8
bromodichloromethane		chemical toxicant			0.0131	CDH1
LTB4R/LTB4R2		group			0.0131	CXCL8
NDPK		group			0.0131	CXCL8
C17orf98		other			0.0131	XIST
NF279		chemical reagent			0.0131	CXCL8
ZNF426		other			0.0131	XIST
USP20		peptidase			0.0131	VCAM1
RNF165		enzyme			0.0131	XIST
LMTK3		kinase			0.0131	HSPB8
CMTM8		cytokine			0.0131	CDH1
CD3-TCR		complex			0.0131	TOB1
PCOLCE2		other			0.0131	SCARB1
SNAI3		transcription regulator			0.0131	CDH1
HDLBP		transporter			0.0131	CSF1R
PRG3		other			0.0131	CXCL8
FCN1		peptidase			0.0131	CXCL8
ZNF503		other			0.0131	CDH1
ZNF580		other			0.0131	CXCL8
LOXL3		enzyme			0.0131	CDH1
RPS6KA		group			0.0131	CXCL8
LAYN		other			0.0131	XIST
BAHD1		other			0.0131	IGF2
RGMB		other			0.0131	CDH1
FBXO8		other			0.0131	XIST
9530018H14Rik		other			0.0131	CDH1
rimantadine		chemical drug			0.0131	CXCL8
Oxi-4503		chemical drug			0.0131	CXCL12
TSIX		other			0.0131	XIST
ACBD3		other			0.0131	SLC11A2
PTPRM		phosphatase			0.0131	CTNND1
MKI67		other			0.0131	CDH1
PAIP2		translation regulator			0.0131	CAMK2A
EXOC8		other			0.0131	CDH1
F11R		other			0.0131	CDH1
KSR2		kinase			0.0131	CXCL8
CFI		peptidase			0.0131	C3
IQSEC1		other			0.0131	CDH1
GOLGA3		transporter			0.0131	SRR
RBBP9		other			0.0131	CDH1
FALEC		other			0.0131	ECM1
RNGTT		phosphatase			0.0131	SCARB1
TNPO2		transporter			0.0131	CXCL8
PARVA		other			0.0131	PARVB
TYMP		growth factor			0.0131	CXCL8
PPP1R3A		phosphatase			0.0131	THBS1
RRAS2		enzyme			0.0131	CDH1
FDCSP		other			0.0131	CDH1
CFD		peptidase			0.0131	C3
JAM2		other			0.0131	CXCL12
RARRES1		other			0.0131	GRK5
16:0 ceramide-1-phosphate		chemical - endogenous mammalian			0.0131	CXCL8
WASF3		other			0.0131	CDH1
GSTT1		enzyme			0.0131	GSTM3
Nedd4		enzyme			0.0131	THBS1
PRR13		other			0.0131	THBS1
RBP2		transporter			0.0131	CDH1
beractant		chemical drug			0.0131	CXCL8
dexamethasone/tobramycin		chemical drug			0.0131	TLR2
BMS-275183		chemical drug			0.0131	THBS1
nafoxidine		chemical drug			0.0131	C3
pustulan		chemical reagent			0.0131	CXCL8
L-threo-safingol		chemical drug			0.0131	CXCL8
mifobate		chemical drug			0.0131	CDH1
flunitrazepam		chemical drug			0.0131	CXCL8
tolrestat		chemical drug			0.0131	CXCL8
2-nitrophenyl EGTA		chemical reagent			0.0131	AHNAK
potassium iodide		chemical drug			0.0131	CXCL8
D-JNK inhibitor I		chemical drug			0.0131	CSF1R
(13S)-hydroperoxyoctadecadienoic acid		chemical - endogenous mammalian			0.0131	CD36
poractant alfa		chemical drug			0.0131	CXCL8
lactulose		chemical - endogenous mammalian			0.0131	CXCL8
V2+		chemical toxicant			0.0131	CXCL8
miR-4433a-5p (miRNAs w/seed GUCCCAC)		mature microrna		0.158	0.0132	ACVR2B, AKR1B1, AOX1, ASTN2, CACUL1, CORO2A, CTDSPL, CXCL8, CYP4F2, EFEMP1, FCGR3A/FCGR3B, GALNT2, HIF1AN, PIGS, SLIT3, ZNF362, ZNF420
PP1		chemical - kinase inhibitor			0.0134	CDH1, CXCL8, VCAM1
MBTD1		other			0.0134	AQP9, SELENOP, XIST
BSG		transporter			0.0134	CDH1, CXCL12, CXCL8
losartan potassium		chemical drug	Inhibited	-2.219	0.0135	CD36, CXCL8, GRK5, ITPR2, VCAM1
miR-640 (miRNAs w/seed UGAUCCA)		mature microrna		0	0.0139	CALD1, CD1A, CHRM5, CRISP2, DMAC1, IGF2BP3, ING5, OR6A2, PTPN18, SRR, THBS1, TPM2, ULK2, ZNF667
IL1		group	Activated	2.5	0.0139	C2, C3, CD1A, CFB, CSF1R, CXCL8, NRP2, PIGR, TLR2, VCAM1
cocaine		chemical drug		1.937	0.014	CAMK2A, CXCL8, DUSP14, DUSP5, GABRD, OAS1, THBS1
cyclosporin A		biologic drug		-1.506	0.014	AKR1B1, CBLB, CD1A, CDH1, CXCL8, GSTM3, ID3, ITPR2, NME1, PARD3, RAB11B, VCAM1
PECAM1		other			0.0141	CD36, THBS1
mir-451		microrna			0.0141	EMC4, ETS2
CSF3R		transmembrane receptor			0.0141	CXCL12, LTF
LAMC1		other			0.0141	ETS2, IGF2
VCP		enzyme			0.0141	CXCL8, VCAM1
MVP		other			0.0141	CD1A, CXCL8
gallic acid		chemical - endogenous non-mammalian			0.0141	CXCL8, VCAM1
PD98059		chemical - kinase inhibitor		-0.944	0.0141	C3, CD36, CDH1, CXCL8, DUSP5, ID3, IGF2, MITF, OSMR, SCARB1, SELENOP, THBS1, TLR2, VCAM1
miR-5087 (miRNAs w/seed GGUUUGU)		mature microrna		-0.632	0.0142	DCX, DSC2, KPNB1, MCAM, OSMR, PARD3, POLR1D, SCRN1, TMEM232, ZNF280B
Hsp27		group			0.0144	CD1A, CSF1R, CXCL8
MEOX2		transcription regulator			0.0144	CXCL8, ID3, VCAM1
miR-580-5p (miRNAs w/seed AAUGAUU)		mature microrna		0.707	0.0145	AOX1, BDH2, C2orf80, CCDC141, DUSP14, FMC1, MRPS35, SCPEP1
dextran sulfate		chemical drug			0.0145	C3, CD36, CFH, CXCL8, ID3, OSMR, THBS1, VCAM1
AHR		ligand-dependent nuclear receptor		-0.549	0.0147	ACTL6A, ADAMTS2, ATOH8, CD36, CDH1, COL6A1, EFEMP1, NMT2, SLC1A4, THBS1
miR-1900 (and other miRNAs w/seed GCCGCCC)		mature microrna	Activated	2.84	0.0152	CARD10, CCDC92, CYGB, DNAJC22, GABRD, GADD45G, GALNT2, ING5, OSBP2, PARVB, PHF21A, RAB11B, STARD10, TRPM2, ZNF362
EIF3E		other			0.0154	CD36, DYNC1H1, THBS1
AGT		growth factor		1.667	0.0155	ANK3, CD36, COL6A1, CXCL8, EFEMP1, GRK5, ID3, ITPR2, NOTCH4, PPFIBP1, SCARB1, VCAM1
oleic acid		chemical - endogenous mammalian		-0.8	0.0156	AQP9, CD36, CYP4F2, TLR2, VCAM1
resveratrol		chemical drug		-1.629	0.0157	CD36, CDH1, CSF1R, CXCL8, CYP4F2, DCX, IGF2, MITF, VCAM1
EGFR		kinase		0.116	0.0157	CDH1, COL6A1, CXCL12, CXCL8, DSC2, IGF2, IGF2BP3, KPNB1, OSMR, PBX1, THBS1
IL6		cytokine		0.773	0.0159	ADGRB1, AHNAK, C3, CD163L1, CD36, CDH1, CXCL8, ETS2, GADD45G, GP5, IGF2, LTF, MRAS, TBC1D9, THBS1, TLR2, VCAM1
leukotriene C4		chemical - endogenous mammalian			0.0161	CXCL8, VCAM1
C1q		complex			0.0161	CXCL8, VCAM1
Sod		group			0.0161	DSC2, VCAM1
THRAP3		transcription regulator			0.0161	APLP2, RYBP
SMC3		other			0.0161	CXCL12, THBS1
TNFAIP2		other			0.0161	IL15RA, LHX2
P2RY2		g-protein coupled receptor			0.0161	CXCL8, VCAM1
PTAFR		g-protein coupled receptor			0.0161	CDH1, CXCL8
10-nitrooleate		chemical - endogenous mammalian			0.0161	CXCL8, VCAM1
TNFSF9		cytokine			0.0161	CXCL8, VCAM1
CNR2		g-protein coupled receptor			0.0161	CXCL8, GRK5
RGS1		other			0.0161	IL15RA, LHX2
Go6983		chemical - kinase inhibitor			0.0161	CD36, SCARB1
deguelin		chemical drug			0.0161	CDH1, CXCL8
caffeic acid		chemical drug			0.0161	AKR1B1, CXCL8
let-7a-5p (and other miRNAs w/seed GAGGUAG)		mature microrna		0.294	0.0161	ACVR2B, ARID3B, ARMC10, C2, CPSF4, CXCL8, CYP4F2, DCX, GALNT2, GATM, IGF2BP3, KRT78, MTUS1, OSMR, PANX2, PARD6B, PARVB, PBX1, POU6F2, SLC1A4, TEAD3, THBS1, TPM2, TRAPPC13, TRIM32, ULK2, ZNF280B, ZNF362
HMOX1		enzyme	Inhibited	-2.186	0.0161	CXCL12, CXCL8, ID3, THBS1, VCAM1
forskolin		chemical toxicant		-1.419	0.0161	CARD10, CTNND1, DUSP14, ECM1, ERFE, GADD45G, GRK5, ID3, IGF2, ITPR2, LTF, MITF, RPL38, SCARB1, THBS1, TPM2
miR-331-3p (miRNAs w/seed CCCCUGG)		mature microrna		-1.058	0.0163	ALPK3, AQP9, ARID3B, ATOH8, CACNA1D, CADPS, CAMK2A, CHRM5, DUSP5, FCGR3A/FCGR3B, HEG1, ING5, MEIS1, NRP2, SNX33, TTC38
miR-4707-5p (miRNAs w/seed CCCCGGC)		mature microrna		1.155	0.0165	CDHR5, FCGR3A/FCGR3B, GABRD, GALNT2, GP5, GRK5, IGF2, MCAM, OSBP2, OSBPL5, OSGIN1, RAB11B
STK40		kinase			0.0165	CXCL8, MR1, PF4
LY294002		chemical - kinase inhibitor		-0.072	0.0167	CD36, CDH1, CXCL8, ETS2, GPR183, GSTM3, IGF2, MITF, SCARB1, SEMA3C, THBS1, TLR2, VCAM1
miR-126a-5p (and other miRNAs w/seed AUUAUUA)		mature microrna		-0.412	0.0167	CAMK2A, GGACT, HSPB8, MITF, MR1, OAS1, PRTG, SLC45A3, TOB1, ZNF814
miR-4317 (miRNAs w/seed CAUUGCC)		mature microrna		1.941	0.0169	ASB11, CLEC6A, CRISP2, DCX, GADD45G, MRPS35, NME1, PTER, RGS6, RGSL1, RRAGD, SCG5, SRR
isotretinoin		biologic drug		0	0.017	CXCL8, OAS1, TLR2, VCAM1
BMP2		growth factor		-1.026	0.0171	CDH1, CXCL12, ID3, MRAS, NFYC, RGS6, TOB1
miR-549a (miRNAs w/seed GACAACU)		mature microrna		-0.577	0.0172	AFAP1L2, AOX1, ATP6AP1L, C1R, CCDC141, CXCL8, DMTF1, HSPBAP1, MPP6, SEMA3C, SRD5A1, ZNF667
CSF2		cytokine		1.834	0.0175	C3, CD1A, CDH1, CFH, CLEC6A, CSF1R, CXCL8, ID3, OSMR, SLC11A2, THBS1, TLR2
miR-128-3p (and other miRNAs w/seed CACAGUG)		mature microrna		0.794	0.0177	C2orf80, CCDC92, CCDC94, CYP4F2, DCX, DMTF1, DUSP5, DYNLT1, ID3, ING5, LDLRAD3, MPP6, NRP2, PF4, PTER, PTPN18, RGS6, RYBP, TMTC2
miR-6830-3p (miRNAs w/seed GUCUUUC)		mature microrna		-0.577	0.0178	AOX1, AQP9, CD36, CLEC6A, CYP4F2, GATM, HSPBAP1, IKBIP, NRXN1, RYBP, SRR, THBS1
NR3C2		ligand-dependent nuclear receptor		-0.243	0.0179	CXCL8, FKBP1B, NRXN1, SEMA3C, TACC2
HIF1A		transcription regulator		0.715	0.0179	AQP9, CDH1, CXCL12, CXCL8, IGF2, KIFC2, MITF, SRD5A1, THBS1, TLR2, VCAM1
miR-516a-3p (and other miRNAs w/seed GCUUCCU)		mature microrna		-0.688	0.0181	ASTN2, CACUL1, CFAP100, CHRM5, CSF1R, CYGB, DUSP5, EVA1C, HEG1, HRH1, KRT78, LDLRAD3, MRAS, SCPEP1, SLIT3, SPRED1, TRIM32, TTC38, YTHDC2
miR-6827-5p (miRNAs w/seed GGGAGCC)		mature microrna		0.192	0.0182	ALPK3, CACUL1, CCDC141, CD300LB, CDHR5, CXCL12, DCX, DSC2, FAM20C, HCFC1, HEG1, HSPB8, ID3, KIR3DL2, KRT78, KRT80, LDLRAD3, MCAM, OSGIN1, SCARB1, SERPING1, SMURF1, SRR, TEX264, TULP3, ULK2, ZBTB40
PD 0325901		chemical drug			0.0182	CXCL8, VCAM1
CFB	1,743	peptidase			0.0182	C3, C3AR1
TNFRSF6B		transmembrane receptor			0.0182	CXCL8, VCAM1
mir-515		microrna			0.0182	CDH1, CXCL8
DDR1		kinase			0.0182	CDH1, VCAM1
IL17D		cytokine			0.0182	CXCL8, OAS1
erythromycin		chemical drug			0.0182	CXCL8, TLR2
D609		chemical reagent			0.0182	CXCL8, VCAM1
indole		chemical - endogenous mammalian			0.0182	CXCL8, PRKCI
IL6R		transmembrane receptor		-0.277	0.0186	CD36, CXCL8, IGF2, VCAM1
DNMT1		enzyme			0.0186	CDH1, IGF2, MYL6B, XIST
advanced glycation end-products		chemical - endogenous mammalian			0.0187	CXCL12, CXCL8, VCAM1
BAPTA-AM		chemical reagent			0.0187	CDH1, CXCL8, VCAM1
carrageenan		chemical - endogenous non-mammalian			0.0187	CXCL8, SELENOP, TRPM2
miR-4305 (miRNAs w/seed CUAGACA)		mature microrna		-0.577	0.0189	AKR1B1, CALD1, CCDC94, DCX, FCGR3A/FCGR3B, KLF15, POLR1D, RALBP1, SELENOP, SEMA3C, SRD5A1, TLR2
miR-4783-3p (miRNAs w/seed CCCGGUG)		mature microrna		0.905	0.0191	ADAMTS2, ARID3B, FETUB, PARVB, PIGQ, SIVA1, SRD5A1, STARD10, STX2, TBC1D2, TTC38
FLT1		kinase		1	0.0194	APLP2, IGF2BP3, SCRN1, THBS1
miR-9-5p (and other miRNAs w/seed CUUUGGU)		mature microrna		0.876	0.0197	AKR1B1, AOX1, ARID3B, ATOH8, CADPS, CDH1, EFEMP1, FAM117A, IGF2BP3, IKBIP, KIAA2013, LDLRAD3, MYRFL, PIGS, POU6F2, RYBP, ULK2
AMPK		complex	Inhibited	-2.177	0.0198	CDH1, CXCL12, CXCL8, CYP4F2, VCAM1
IFNLR1		transmembrane receptor			0.0199	CLEC4D, THBS1, TLR2
miR-202-3p (and other miRNAs w/seed GAGGUAU)		mature microrna		-0.258	0.02	ARID3B, CCDC141, CXCL8, CYP4F2, GALNT2, GATM, KRT78, PANX2, PARD6B, SEPHS2, TMEM232, TMEM35B, TRAPPC13, VCAM1, ZNF280B
miR-222-5p (miRNAs w/seed UCAGUAG)		mature microrna		-1.604	0.0201	CALD1, FCGR3A/FCGR3B, IKBIP, LTF, MPP6, POLK, PTER, SELENOP, SEMA3C, SLC11A2, SRR, STX2, TOB1, TRAPPC13
MAP2K1/2		group		1.944	0.0202	C3, CDH1, PRKCI, SCARB1
miR-199a-3p (and other miRNAs w/seed CAGUAGU)		mature microrna		-0.336	0.0202	APLP2, CALD1, CBLB, CCDC92, CXCL12, DNAJC22, DUSP5, FCGR3A/FCGR3B, MPP6, PTER, SEMA3C, SLC11A2, SRR, TACC2, ZCCHC17
miR-5196-3p (miRNAs w/seed CAUCCUC)		mature microrna		0.258	0.0205	ABHD11, ASTN2, C3AR1, CACUL1, CAMK2A, CDH1, CHRM5, CTDSPL, GALNT2, KPNB1, KRT78, PARD6B, POLR1D, SPAG17, SRR
ZC3H14		other			0.0205	IL15RA, LHX2
SLC9A3R1		other			0.0205	CDH1, SCARB1
FKBP4		enzyme			0.0205	C3, IL15RA
LBP		transporter			0.0205	CXCL8, TLR2
miR-3944-3p (miRNAs w/seed UCGGGCU)		mature microrna		1.897	0.0207	ARID3B, DUSP14, ERFE, GABRD, GALNT2, KRT80, PBX1, PTER, RAB11B, RALBP1
tretinoin		chemical - endogenous mammalian		0.606	0.021	AHNAK, AQP9, ATOH8, C3, C3AR1, CD36, CDH1, CSF1R, CTNND1, CXCL8, CYP4F2, DCX, ECI2, ID3, IGF2, ITPR2, KLF15, LTF, MEIS1, MPP6, MRAS, OAS1, ORC3, SCPEP1, SERPING1, STARD10, THBS1, TLR2, VCAM1, ZNF133
ciglitazone		chemical drug		0.747	0.0211	CD36, CXCL8, MITF, VCAM1
Alpha catenin		group		0.365	0.0211	ADAMTS2, COL6A1, CXCL12, IGF2, VCAM1
Collagen(s)		complex			0.0211	C3, C3AR1, THBS1
fenofibrate		chemical drug		-1.031	0.0214	ACMSD, CD36, CSF1R, CXCL8, ECI2, MITF, SCARB1, VCAM1
miR-3191-3p (miRNAs w/seed GGGGACG)		mature microrna		1.706	0.0216	AKR1B1, ALPK3, BBS4, C2, CAMK2A, CD300LB, CDHR5, CHRM5, COL6A1, DYNLT1, HSPB8, IGF2, KLF15, MEIS1, NOTCH4, PANX2, PDF, PIGQ, RAB11B, SCARB1, SCRN1, TTC38
salmonella minnesota R595 lipopolysaccharides		chemical - endogenous non-mammalian		1.095	0.0218	CXCL8, ETS2, ITPR2, TLR2, VCAM1
IL18		cytokine		0.185	0.0219	CDH1, CXCL12, CXCL8, FCGR3A/FCGR3B, GADD45G, VCAM1
FGF2		growth factor		-0.733	0.0221	AKR1B1, CDH1, CXCL12, ID3, IGF2, MCAM, MITF, NOTCH4, THBS1, VCAM1
MYD88		other		0.637	0.0223	C3, CXCL12, CXCL8, ETS2, ITPR2, SCARB1, TLR2, VCAM1
miR-27a-3p (and other miRNAs w/seed UCACAGU)		mature microrna		-0.218	0.0224	ANK3, AOX1, ASB11, ATXN10, C2orf80, CALD1, CBLB, CRISP2, DUSP5, DYNLT1, ID3, IGF2BP3, ING5, MITF, NRP2, NRXN1, PARD6B, PF4, RYBP, SRM, TRAPPC13
Hdac		group		-1.099	0.0225	ACVR2B, CSF1R, CXCL8, NOTCH4, PBX1, SEMA3C
miR-6742-5p (miRNAs w/seed GUGGGGU)		mature microrna		0.354	0.0225	APLP2, ARID3B, ATOH8, CAMK2A, CHRM5, CYGB, CYP4F2, DCX, ECM1, HRH1, HSPB8, HSPBAP1, ID3, IGF2, LHX2, MEIS1, MRPS35, OSBP2, OSBPL5, PARVB, PTPN18, RALBP1, RGS6, SCAND1, SLC28A3, SNX33, TBC1D2, TEAD3, TPM2, TTC38, TULP3, ZNF362
Ca2+		chemical - endogenous mammalian		0.077	0.0227	CDH1, CXCL8, GRK5, GUCY1A2, ID3, ITPR2, MCAM, SCARB1
FFAR3		g-protein coupled receptor		-1	0.0228	CLEC6A, DUSP14, GPR183, KLF15
maslinic acid		chemical - endogenous non-mammalian			0.0228	CDH1, ITPR2, PRKCI, THBS1
mannitol		chemical - endogenous mammalian			0.0228	AKR1B1, AQP9
IL36G		cytokine			0.0228	CD1A, CXCL8
CXCL3		cytokine			0.0228	CLEC6A, GRK5
ellagic acid		chemical - endogenous non-mammalian			0.0228	AKR1B1, SCARB1
WNT5A		cytokine		0.785	0.0232	CDH1, CXCL12, CXCL8, ID3, PRKCI
CLDN7		other		-0.351	0.0232	APLP2, C3, CXCL8, NUDT21, PANX2
cholesterol		chemical - endogenous mammalian	Activated	2.506	0.0232	AQP9, CXCL8, MITF, SCARB1, SLC28A3, THBS1, VCAM1
miR-3185 (miRNAs w/seed GAAGAAG)		mature microrna		0.277	0.0233	ASTN2, CCDC141, CCDC92, CD1A, DCX, EFEMP1, EMC6, FCGR3A/FCGR3B, GGACT, NME1, PLXDC2, SEMA3C, TBC1D2
GMNN		transcription regulator			0.0237	CDH1, DUSP5, EFEMP1, NUDT21
APP		other		1.409	0.0238	APLP2, C1R, C3, CDH1, CSF1R, CXCL12, CXCL8, DCX, ETS2, GSTM3, IGF2, KPNB1, NME1, NRP2, SCARB1, SCG5, SLC11A2, TLR2, VCAM1
SMARCB1		transcription regulator		1.342	0.0243	CDH1, DOCK4, DSC2, ETS2, IL15RA, OAS1
HRAS		enzyme		0.785	0.0244	CALD1, CDH1, CFB, CXCL12, CXCL8, DMTF1, EFEMP1, GADD45G, IGF2, MCAM, OSBP2, SIVA1, THBS1, ULK2
FGF1		growth factor		-1.406	0.0246	AKR1B1, CDH1, GADD45G, THBS1, VCAM1
miR-6771-5p (miRNAs w/seed UCGGGAG)		mature microrna		1.941	0.0246	ARID3B, CCDC92, CD300LB, CDHR5, FAM120B, HSPB8, IGF2, KIFC2, KRT80, MCAM, STX2, ZNF814, ZSCAN12
cycloheximide		chemical reagent		-0.327	0.0248	CAMK2A, CXCL8, GADD45G, IGF2, PIGR, SCARB1, SIVA1, THBS1, TOB1, VCAM1
Salmonella enterica serotype abortus equi lipopolysaccharide		chemical toxicant		0.97	0.0249	CFB, ETS2, IL15RA, OSGIN1, TEX14, THBS1
CBX7		other			0.0253	CDH1, CXCL8
mir-144		microrna			0.0253	EMC4, ETS2
TLR1		transmembrane receptor			0.0253	CXCL8, IL15RA
BID		other			0.0253	C3AR1, CXCL8
PTK2B		kinase			0.0253	CDH1, CXCL8
SUV39H1		enzyme			0.0253	CDH1, CSF1R
creatine		chemical - endogenous mammalian			0.0253	GATM, TLR2
lead		chemical toxicant			0.0253	CXCL8, GSTM3
miR-5691 (and other miRNAs w/seed UGCUCUG)		mature microrna		0	0.0257	ABHD11, CACUL1, DUSP5, EMC4, FAM117A, IGF2, LHX2, NMT2, PLEKHA5, POLR3E, SCRN1, SPRED1, TBC1D2, TMTC2, TULP3, ZNF667
miR-212-5p (miRNAs w/seed CCUUGGC)		mature microrna		1.414	0.0258	ATOH8, CXCL8, CYGB, ETS2, ID3, ITPR2, KNOP1, LDLRAD3, NFYC, NRP2, NRXN1, OSBP2, PDF, PIGS, SALL2, SCRN1, TPM2, ZMYND10
dihydrotestosterone		chemical - endogenous mammalian		-0.229	0.026	CD36, CDH1, COL6A1, CST6, MCAM, PHF21A, SELENOP, SLC11A2, SLC1A4, SRD5A1, TACC2, THBS1, VCAM1
Convulxin		complex			0.0261	CXCL8
hypoxanthine		chemical - endogenous mammalian			0.0261	CXCL8
tenofovir		chemical drug			0.0261	CXCL8
SB 220025		chemical - kinase inhibitor			0.0261	CXCL8
1,4-glucan		chemical - endogenous mammalian			0.0261	CXCL8
15-LOX		group			0.0261	CD36
OR51E2		g-protein coupled receptor			0.0261	CDH1
SLC39A6		transporter			0.0261	CDH1
ALX1		transcription regulator			0.0261	CDH1
GPR4		g-protein coupled receptor			0.0261	VCAM1
DUOX1		enzyme			0.0261	CXCL8
PYGO1		other			0.0261	XIST
SENP5		peptidase			0.0261	CXCL8
AFAP1L2	-1,648	other			0.0261	CXCL8
dibromoacetic acid		chemical toxicant			0.0261	IGF2
GNA14		enzyme			0.0261	CXCL8
IBSP		other			0.0261	THBS1
CCNC		kinase			0.0261	VCAM1
GSTM1		enzyme			0.0261	CXCL8
CNTN1		enzyme			0.0261	CDH1
CDK10		kinase			0.0261	ETS2
COL7A1	1,430	other			0.0261	THBS1
H19		other			0.0261	IGF2
NCKAP1		other			0.0261	KIR3DL2
TGFBI		other			0.0261	CDH1
PLPP3		phosphatase			0.0261	CTNND1
gedatolisib		chemical drug			0.0261	CXCL8
Tmsb4x (includes others)		other			0.0261	CDH1
GPR32		g-protein coupled receptor			0.0261	CXCL8
TMEM9B		other			0.0261	CXCL8
CBR1		enzyme			0.0261	CDH1
3-hydroxydodecanoic acid		chemical - endogenous mammalian			0.0261	CXCL8
6-n-octylaminouracil		chemical - kinase inhibitor			0.0261	CXCL8
DDX20		transcription regulator			0.0261	IGF2
FXYD5		ion channel			0.0261	CDH1
CLDN3		transmembrane receptor			0.0261	CDH1
ATAD3A		other			0.0261	CDH1
Sf1		other			0.0261	VCAM1
COL17A1		other			0.0261	CXCL8
Il17d		cytokine			0.0261	CXCL8
amprenavir		chemical drug			0.0261	CD36
desethylamiodarone		chemical - endogenous mammalian			0.0261	CXCL8
dioctyl adipate		chemical toxicant			0.0261	CD36
BIBX1522		chemical - kinase inhibitor			0.0261	CXCL8
miltefosine		chemical drug			0.0261	ABCA3
phenylhydrazine		chemical toxicant			0.0261	SLC11A2
SF 6847		chemical toxicant			0.0261	CXCL8
thiamine		chemical - endogenous mammalian			0.0261	AKR1B1
Z-YVAD-FMK		chemical reagent			0.0261	CXCL8
ingenol-dibenzoate		chemical reagent			0.0261	CD36
tetrahydropalmatine		chemical - endogenous non-mammalian			0.0261	CXCL8
KT 5926		chemical - kinase inhibitor			0.0261	VCAM1
dihydrolipoic acid		chemical - endogenous mammalian			0.0261	MITF
elaidic acid		chemical - endogenous mammalian			0.0261	VCAM1
polyinosinic acid		chemical reagent			0.0261	VCAM1
JTV519		chemical drug			0.0261	FKBP1B
L-canavanine		chemical - endogenous non-mammalian			0.0261	HSPB8
D-mannose		chemical - endogenous mammalian			0.0261	CXCL8
androsterone		chemical - endogenous mammalian			0.0261	SLC45A3
17-epiestriol		chemical - endogenous mammalian			0.0261	VCAM1
folic acid		chemical - endogenous mammalian			0.0264	CDH1, IGF2, VCAM1
TLR4		transmembrane receptor		1.759	0.0264	C3, CDH1, CFB, CXCL8, GADD45G, IL15RA, LHX2, SCARB1, TLR2, VCAM1
ERBB4		kinase		-1.732	0.0266	CDH1, CXCL12, IGF2, THBS1
mir-10		microrna			0.0266	CDH1, CTDSPL, IGF2, PTPN18
ionomycin		chemical reagent		0.248	0.0268	AHNAK, CXCL8, ERFE, ETS2, ITPR2, TLR2
miR-4264 (miRNAs w/seed CUCAGUC)		mature microrna		-0.832	0.027	ATOH1, CD300LB, DMAC1, ECHDC3, FCGR3A/FCGR3B, FETUB, IL15RA, MPP6, PBX1, RGSL1, SPRED1, STARD3, ZSCAN12
miR-1911-3p (miRNAs w/seed ACCAGGC)		mature microrna		-0.229	0.0271	CACNA1D, DMTF1, EMC4, ERFE, GATM, GGACT, HSPBAP1, IRAK2, KPNB1, MAP7D3, MRAS, NMT2, PBX1, SNX33, SPRED1, SRR, TTC38, ZBTB40, ZNF280B
NR4A1		ligand-dependent nuclear receptor		0.374	0.0275	CD36, COL6A1, CTNND1, CXCL12, STARD10, VCAM1
RHOA		enzyme			0.0276	CDH1, CXCL8, SCARB1, VCAM1
KIT		transmembrane receptor			0.0277	C3AR1, CPA3, IL15RA, MITF, PTPN18
miR-8088 (miRNAs w/seed CUCGGUA)		mature microrna		0.333	0.0278	ANK3, CAMK2A, CDH1, CTNND1, DCX, DMTF1, GABRD, RGS6, ZNF362
sunitinib		chemical drug			0.0278	COL6A1, COL7A1, ECM1
11,12-epoxyeicosatrienoic acid		chemical - endogenous mammalian			0.0279	NME1, VCAM1
Lymphotoxin		complex			0.0279	CXCL8, VCAM1
ERVW-1		other			0.0279	CXCL8, SLC1A4
HTATIP2		transcription regulator			0.0279	ADGRB1, CDH1
GPER1		g-protein coupled receptor			0.0279	CACNA1D, LTF
SP100		transcription regulator			0.0279	HSPB8, SRD5A1
LY6E		other			0.0279	CXCL8, IRAK2
7-ketocholesterol		chemical - endogenous mammalian			0.0279	CXCL8, SCARB1
finasteride		chemical drug			0.0279	GABRD, SRD5A1
DMD		other			0.0282	APLP2, DCX, GABRD, GATM, SELENOP, STARD10
FOS		transcription regulator		1.195	0.0284	ANK3, APLP2, C3AR1, CDH1, COL6A1, CTNND1, CXCL8, FETUB, HSPB8, NOTCH4, PARD6B, SMURF1, VCAM1
lipopolysaccharide		chemical drug		1.954	0.0285	ACVR2B, C3, C3AR1, CD163L1, CD1A, CD36, CDH1, CFB, CLEC4D, COL6A1, CSF1R, CSTB, CXCL12, CXCL8, CYP4F2, DUSP5, ETS2, GPR183, ID3, IL15RA, IRAK2, LTF, OAS1, OSMR, PF4, PIGR, SCARB1, SELENOP, STX2, THBS1, TLR2, VCAM1
hydrogen peroxide		chemical - endogenous mammalian		1.687	0.0286	CDH1, CXCL8, ETS2, GSTM3, ID3, MCAM, MITF, OSGIN1, PRKCI, RALBP1, SELENOP, VCAM1
Ifnar		group		1.982	0.0286	C3, OAS1, TLR2, VCAM1
BRAF		kinase			0.0286	CDH1, CSF1R, CXCL8, THBS1
miR-1273h-5p (and other miRNAs w/seed UGGGAGG)		mature microrna		1.543	0.0287	ABHD11, ARMC10, CD300LB, CDH1, COL6A1, CSF1R, CTDSPL, CTNND1, CXCL12, DCX, DNAH7, ERFE, FAM117A, FAM120B, FKBP1B, GALNT2, GGACT, GP5, GPR183, HCFC1, IRAK2, KLF15, KRT80, MTUS1, OSBP2, PARD6B, PDF, PIGR, PRKCI, PTPN18, RAB11B, RGS6, SLC1A4, SLIT3, SNX33, SRR, STARD3, STX2, THBS1, TMEM232, ZCCHC17, ZNF667
SPI1		transcription regulator		1.109	0.0288	C3AR1, CSF1R, ETS2, ID3, LTF, POLR1D, TLR2
miR-4524a-3p (miRNAs w/seed GAGACAG)		mature microrna		0.218	0.0292	ABHD11, AOX1, ARMC10, CDH10, CFAP100, CPSF4, DMAC1, DNAJC22, DSC2, DUSP5, FCGR3A/FCGR3B, GRK5, HRH1, KNOP1, LTF, MR1, SRM, TPM2, TTC38, TTC5, ZNF814
miR-4524a-5p (and other miRNAs w/seed UAGCAGC)		mature microrna		0.728	0.0292	ACVR2B, ARMC10, CACUL1, CDH10, COX6B1, CTDSPL, DMAC1, DMTF1, EMC4, IRAK2, OOEP, PARD6B, PLEKHA5, RYBP, SCRN1, SPRED1, ZNF362
Rock		group			0.0293	CDH1, CXCL8, VCAM1
FHL2		transcription regulator			0.0293	CXCL12, CXCL8, MITF
APOA1		transporter			0.0293	SCARB1, TLR2, VCAM1
miR-4256 (miRNAs w/seed UCUGACC)		mature microrna		-1.069	0.0293	CTDSPL, GALNT2, HIST1H2AA, HRH1, MCAM, PLEKHA5, PRKCI, PRTG, SCARB1, SNX33, SRD5A1, STARD3, TEX29, TMEM232
VCAN		other		-0.651	0.0294	C1R, C3, CXCL12, SERPING1, VCAM1
miR-6889-3p (and other miRNAs w/seed CUGUGCC)		mature microrna		-0.243	0.0295	ABCA3, ABHD11, ARID3B, CD300LB, CPA3, CXCL12, ERFE, ETS2, KRT80, MRAS, PARD3, PIGR, RYBP, SCPEP1, SNX33, TULP3, ZNF667
MAP2K1		kinase		0.6	0.0296	CXCL8, DUSP5, MITF, RRAGD, SCARB1, THBS1
ITGB1		transmembrane receptor		0.958	0.0297	CDH1, CXCL8, IGF2, THBS1
tamoxifen		chemical drug		0.863	0.0298	AHNAK, AQP9, C3, CD36, CDH1, CXCL12, CXCL8, IGF2
miR-4740-5p (miRNAs w/seed GGACUGA)		mature microrna		0.229	0.0302	ALPK3, ARID3B, CCDC141, DCX, DYNLT1, KRT80, LRRC28, MAP7D3, MEIS1, NRXN1, PARD3, PLXDC2, POLR1D, PTER, PTPN18, TPM2, TTC38, TTC5, ZNF667
IKK (complex)		complex			0.0305	CXCL8, VCAM1
CYP2J2		enzyme			0.0305	NME1, VCAM1
tosylphenylalanyl chloromethyl ketone		chemical - protease inhibitor			0.0305	CXCL8, VCAM1
miR-5004-3p (miRNAs w/seed UUGGAUU)		mature microrna		0.577	0.0306	C2orf80, CAMK2A, CFAP53, DCX, GPR183, HSPBAP1, LDLRAD3, OSBPL6, SEMA3C, SPRED1, TEX29, ULK2
beta-estradiol		chemical - endogenous mammalian		-0.703	0.0307	ABCA3, ACTL6A, ACVR2B, C3, CACNA1D, CDH1, CFB, CLEC4D, CSTB, CTNND1, CXCL12, CXCL8, GADD45G, GSTM3, HSPB8, IGF2, LTF, MYOF, NME1, NRP2, OSBPL5, PARD6B, PBX1, PIGR, RYBP, SCARB1, SCG5, SEMA3C, SLC11A2, SRD5A1, THBS1, TLR2, VCAM1
miR-4502 (and other miRNAs w/seed CUGAUGA)		mature microrna		-1	0.0307	CPA3, KIR3DL2, MRPS35, PARD3, SRR, TTC38, VCAM1, ZNF420, ZNF667
RASSF1		other		1	0.0308	EFEMP1, MRAS, MTUS1, SELENOP
DCN		other			0.0308	CDH1, THBS1, VCAM1
TCF7L2		transcription regulator		0.426	0.0312	AQP9, ID3, MCAM, PARVB, POLR1D, SMURF1, SRD5A1, STX2, TMEM163
miR-1245b-3p (miRNAs w/seed CAGAUGA)		mature microrna		0.258	0.0313	AFAP1L2, CCDC141, CLEC6A, CPSF4, CYB5R2, CYGB, DMTF1, ECM1, IKBIP, ITPR2, LY6G6D, NME1, POLR1D, SRD5A1, TMEM232
lysophosphatidic acid		chemical - other			0.0319	CD36, CXCL8, SCARB1, VCAM1
ritonavir		chemical drug			0.0319	CD36, CXCL8, CYP4F2, OSBP2, VCAM1
NR3C1		ligand-dependent nuclear receptor		-1.927	0.0321	C1R, CARD10, CORO2A, CXCL8, IL15RA, NOTCH4, NRXN1, PIGR, PRKCI, SCARB1, SELENOP, SEMA3C, THBS1, TLR2, VCAM1
MAPKAPK2		kinase			0.0323	CXCL8, HSPB8, VCAM1
E. coli B4 lipopolysaccharide		chemical toxicant		0.209	0.0326	CXCL8, ETS2, GADD45G, HSPB8, KIF20B, SCARB1, TLR2, VCAM1
miR-1287-5p (miRNAs w/seed GCUGGAU)		mature microrna		-1.5	0.0327	ABHD11, AOX1, C3AR1, CAMK2A, CTDSPL, EFEMP1, LRRC28, MYOF, NFYC, RGS6, SELENOP, SMURF1, TEAD3, TMEM232, TTC5, ZCCHC17
IRF8		transcription regulator		0.218	0.0328	CFB, CSF1R, ID3, LHX2, OAS1
L-tryptophan		chemical - endogenous mammalian			0.0333	CXCL8, SLC1A4
Tnf receptor		group			0.0333	C3, CXCL8
JUN/JUNB/JUND		group			0.0333	C3, COL7A1
IL36B		cytokine			0.0333	CD1A, CXCL8
Mt2		other			0.0333	ETS2, GSTM3
ilomastat		chemical drug			0.0333	CDH1, CXCL8
miR-339-3p (miRNAs w/seed GAGCGCC)		mature microrna	Activated	3	0.0333	ADGRB1, ERFE, GALNT2, GPR183, ING5, MCAM, MMACHC, RGS6, SCAND1
KRAS		enzyme		0.102	0.0335	AOX1, APLP2, CDH1, CXCL8, DUSP5, EFEMP1, IGF2, KPNB1, MCAM, OAS1, PPFIBP1, THBS1
miR-302c-3p (and other miRNAs w/seed AGUGCUU)		mature microrna		-0.229	0.0335	AFAP1L2, AQP9, CACUL1, CCDC141, CEP55, CLEC4D, CXCL8, DNAJC22, EFEMP1, IGF2, IGF2BP3, IRAK2, MTUS1, POLK, RRAGD, RYBP, SEMA3C, SPRED1, TTC5
SYVN1		transporter		0.447	0.0337	APLP2, IRAK2, MCAM, MYOF, NUDT21
miR-4326 (miRNAs w/seed GUUCCUC)		mature microrna		-1.604	0.0338	HRH1, HSPBAP1, IRAK2, KIR3DL2, LHX2, NME1, NRXN1, PARD3, PKP4, POLR3E, PPFIBP1, SNX33, SPRED1, THBS1
miR-3201 (and other miRNAs w/seed GGAUAUG)		mature microrna		0.302	0.0341	CCDC141, CHRM5, COL6A1, CXCL8, EFEMP1, ERFE, PARD3, PBX1, RYBP, SELENOP, TMEM35B
CALCA		other		1.131	0.0341	AHNAK, ANK3, CXCL8, PLXDC2
desmopressin		biologic drug			0.0341	AHNAK, AKR1B1, ANK3, PLXDC2
miR-8056 (miRNAs w/seed GUGGAUU)		mature microrna		0.832	0.0342	BDH2, CTDSPL, DCX, DMAC1, EFEMP1, ERFE, HSPBAP1, MRAS, NRXN1, OSBPL6, RYBP, SEMA3C, ZSCAN12
miR-5011-3p (and other miRNAs w/seed UGCAUGG)		mature microrna		1.897	0.0343	ASTN2, CCDC92, CXCL12, DNAH7, GP5, IGF2, MEIS1, NRXN1, SRR, TMEM35B
miR-3613-5p (miRNAs w/seed GUUGUAC)		mature microrna		0.333	0.035	AKR1B1, C2orf80, CHRM5, IKBIP, MITF, NME1, PIGS, RRAGD, TRIM32
POMC		other		-0.029	0.0353	IGF2, MITF, SCARB1, VCAM1
miR-4677-3p (miRNAs w/seed CUGUGAG)		mature microrna		-1.069	0.0354	ARID3B, ASB11, CPA3, CSF1R, CXCL8, DMAC1, ETS2, IGF2BP3, OSMR, POLK, PPFIBP1, TEX264, TPM2, TULP3
alefacept		biologic drug			0.0355	CBLB, CXCL8, FCGR3A/FCGR3B
oblimersen		biologic drug			0.0355	CXCL8, OAS1, SCG5
IL11		cytokine			0.0355	CXCL8, GP5, VCAM1
TRIM28		transcription regulator			0.0355	EFEMP1, MITF, ZNF420
glucagon		biologic drug			0.0355	AHNAK, ANK3, PLXDC2
EGR1		transcription regulator		1.572	0.0356	CDH1, CXCL8, IGF2, PF4, THBS1, VCAM1
CAV1		transmembrane receptor			0.0356	CD36, CSF1R, SCG5, THBS1, VCAM1
2-aminopurine		chemical reagent			0.0362	CXCL8, OAS1
Fibrin		complex			0.0362	CDH1, CXCL8
NfkB-RelA		complex			0.0362	CXCL8, VCAM1
SKI		transcription regulator			0.0362	CDH1, MITF
epicatechin gallate		chemical drug			0.0362	CXCL8, VCAM1
hydrochloric acid		chemical - endogenous non-mammalian			0.0362	CXCL8, VCAM1
9Z,11E-octadecadienoic acid		chemical - endogenous non-mammalian			0.0362	CD36, THBS1
miR-4763-5p (miRNAs w/seed GCCUGCC)		mature microrna		-0.2	0.0362	AFAP1L2, ARID3B, BDH2, CAMK2A, CCDC141, DNAJC22, FOXRED1, GABRD, GADD45G, HEG1, HRH1, ING5, KLF15, KNOP1, KRT80, NOTCH4, NUP98, PIGQ, SCRN1, STARD3, STX2, TMTC2, TTC38, ZBTB40, ZNF205
miR-3128 (and other miRNAs w/seed CUGGCAA)		mature microrna		0.243	0.0365	C2, C2orf80, CACNA1D, CACUL1, CAMK2A, CXCL8, DSC2, GPR183, IGF2BP3, KIR3DL2, KPNB1, NRXN1, PHF21A, SLC1A4, SLC45A3, TLR2, TMTC2
miR-297a-5p (and other miRNAs w/seed UGUAUGU)		mature microrna		-1.772	0.0366	ASB11, ATXN10, CLEC4D, CYP4F2, FCGR3A/FCGR3B, IKBIP, KIR3DL2, MR1, MRAS, NRP2, NRXN1, ZNF667
miR-3098-3p (and other miRNAs w/seed UCUGCUG)		mature microrna		-0.688	0.0368	ALPK3, AQP9, ATXN10, CLEC4D, CPA3, CTNND1, DSC2, HRH1, KIAA1549L, LDLRAD3, MRAS, NFYC, RALBP1, RGSL1, SCRN1, SNX33, TEX264, TMEM35B, ZCCHC17
miR-6756-5p (and other miRNAs w/seed GGGUGGG)		mature microrna		1.571	0.037	ALPK3, AQP9, ARHGAP32, ARID3B, ARMC10, C2orf68, CAMK2A, CARD10, CCDC141, CLEC4D, COL6A1, COX6B1, CSF1R, CYGB, DCX, DNAJC22, ECM1, ERFE, HCFC1, ID3, IGF2, KLF15, MEIS1, MYL12B, NME1, PANX2, PARVB, POLR1D, POU6F2, PPFIBP1, PTPN18, RAB11B, SCAND1, SCARB1, SLC11A2, SLC1A4, SLIT3, SMURF1, SNX33, SRM, STARD10, TEAD3, TEX29, THBS1, TPM2, TULP3, ZCCHC17, ZMYND10, ZNF362
miR-1972 (miRNAs w/seed CAGGCCA)		mature microrna		0.626	0.0371	AKR1B1, ALPK3, ATOH8, C2, C2orf68, CEP162, CLEC6A, CXCL12, ERFE, GABRD, GGACT, ID3, IGF2, IRAK2, MEIS1, MR1, POLR1D, SCARB1, SNX33, SRR, STARD3, TEX14, TRPM2
CYP1B1		enzyme			0.0372	ECI2, GSTM3, MCAM
GATA2		transcription regulator		0.816	0.0374	AQP9, CD36, CPA3, CSF1R, GP5, GRTP1, LTF, PBX1, THBS1, VCAM1
NFkB (complex)		complex	Activated	2.886	0.0374	C1R, C3, CARD10, CD36, CDH1, CFB, CXCL12, CXCL8, DUSP5, GRK5, IL15RA, SLC11A2, TLR2, VCAM1
miR-1178-3p (miRNAs w/seed UGCUCAC)		mature microrna		0	0.0383	C3AR1, CACUL1, CALD1, CCDC92, CYP4F2, ING5, NUDT21, PIGQ, PKP4, SCARB1, SLC45A3, STX2, TEAD3, VCAM1
adenine		chemical - endogenous mammalian			0.0388	CXCL8
ergosterol-5,8-peroxide		chemical - endogenous non-mammalian			0.0388	VCAM1
benfotiamine		chemical drug			0.0388	AKR1B1
Tropomyosin		group			0.0388	TPM2
TFIIH		complex			0.0388	COL6A1
Egfr-Erbb2		complex			0.0388	CXCL8
NIK		group			0.0388	CXCL8
DEFA1 (includes others)		other			0.0388	CXCL8
CpG ODN 1555		chemical reagent			0.0388	IL15RA
ISX		transcription regulator			0.0388	SCARB1
GLDN		other			0.0388	ANK3
POFUT1		enzyme			0.0388	ATOH1
NOP58		enzyme			0.0388	LTF
Il3r		complex			0.0388	CXCL8
ZNF300		transcription regulator			0.0388	CXCL8
DGKH		kinase			0.0388	CXCL8
ESRP2		other			0.0388	CDH1
bis(4-hydroxycinnamoyl)methane		chemical - endogenous non-mammalian			0.0388	TLR2
TH17 Cytokine		group			0.0388	CXCL8
pycnogenols		chemical drug			0.0388	CXCL8
Hnp alpha		group			0.0388	CXCL8
NCF2		enzyme			0.0388	VCAM1
DAPK1		kinase			0.0388	CXCL8
NRCAM		other			0.0388	ANK3
FLOT2		other			0.0388	CDH1
CLCN3		ion channel			0.0388	VCAM1
FH535		chemical reagent			0.0388	CDH1
EEF1D		translation regulator			0.0388	CDH1
PROS1		other			0.0388	CXCL8
HSPB3		other			0.0388	CXCL8
TPM1		other			0.0388	CALD1
LCOR		transcription regulator			0.0388	CDH1
VSX2		transcription regulator			0.0388	MITF
INPP5K		phosphatase			0.0388	IGF2
PIK3C3		kinase			0.0388	IGF2
CLDN4		transmembrane receptor			0.0388	CDH1
SLC12A6		transporter			0.0388	CDH1
IGF2BP3	-1,587	translation regulator			0.0388	IGF2
GP1BA		transmembrane receptor			0.0388	GP5
RNH1		other			0.0388	CDH1
ERC1		other			0.0388	CXCL8
IL20RA		transmembrane receptor			0.0388	CXCL8
AHCY		enzyme			0.0388	VCAM1
PCYT2		enzyme			0.0388	CD36
CDC6		other			0.0388	CDH1
CRIP2		other			0.0388	CXCL8
SCT		other			0.0388	CD36
CHTOP		other			0.0388	LTF
NKRF		transcription regulator			0.0388	CXCL8
CNTFR		transmembrane receptor			0.0388	CXCL8
anastrozole		chemical drug			0.0388	VCAM1
filipin		chemical - endogenous non-mammalian			0.0388	CXCL8
bongkrekic acid		chemical toxicant			0.0388	VCAM1
chlordecone		chemical toxicant			0.0388	LTF
adapalene		chemical drug			0.0388	TLR2
nickel subsulfide		chemical toxicant			0.0388	CXCL8
vapreotide		biologic drug			0.0388	CXCL8
myristoylated PKCzeta pseudosubstrate peptide inhibitor		chemical - kinase inhibitor			0.0388	VCAM1
TAPI		chemical - protease inhibitor			0.0388	CXCL8
15-hydroxyeicosatetraenoic acid		chemical - endogenous mammalian			0.0388	CD36
raffinose		chemical - endogenous mammalian			0.0388	AKR1B1
desogestrel		chemical drug			0.0388	SRD5A1
danazol		chemical drug			0.0388	CXCL8
IL12B		cytokine			0.0389	CXCL8, DUSP5, VCAM1
thioctic acid		chemical drug			0.0389	CXCL8, MITF, VCAM1
TFAP2A		transcription regulator			0.0389	CDH1, COL7A1, EFEMP1, IGF2
CEBPD		transcription regulator			0.0389	C3, CSF1R, CXCL8, MITF
miR-124-3p (and other miRNAs w/seed AAGGCAC)		mature microrna		-0.825	0.039	CACUL1, CPA3, CPSF4, CTDSPL, CTNND1, CXCL8, CYB5R2, DYNLT1, ECI2, FAM117A, HEATR1, HSPB8, KIAA2013, KLF15, LHX2, MITF, NRP2, RALBP1, RRAGD, SIVA1, SPRED1, STX2, TMEM35B, ULK2, ZNF420, ZNF667
NAMPT		cytokine			0.0391	ATXN10, CXCL8
methyl-beta-cyclodextrin		chemical drug			0.0391	CXCL8, SCARB1
Ni2+		chemical reagent			0.0391	CXCL8, VCAM1
decitabine		chemical drug		-1.313	0.0395	ADGRB1, CDH1, COL7A1, CXCL12, GADD45G, HSPB8, KIR3DL2, NME1, OAS1, SCARB1, THBS1, ULK2
miR-503-5p (miRNAs w/seed AGCAGCG)		mature microrna	Activated	2.183	0.0395	ACVR2B, ARMC10, CACUL1, COL6A1, DMTF1, EMC4, EMC6, GADD45G, IGF2, IRAK2, OOEP, PARD6B, PIGQ, RYBP, SCRN1, SPRED1, ZNF362
miR-4776-3p (miRNAs w/seed UUGCCAU)		mature microrna		-1.069	0.0396	ARMC10, CLEC6A, DOCK4, FCGR3A/FCGR3B, IGF2BP3, IKBIP, KIAA2013, MITF, MRPS35, PARD6B, PLXDC2, POLK, TMTC2, ZNF667
miR-4701-5p (and other miRNAs w/seed UGGCCAC)		mature microrna		1	0.0397	AKR1B1, CCDC141, CCDC92, CD36, CEP55, CTDSPL, EMC6, ERFE, ETS2, ING5, LDLRAD3, NOTCH4, RGS6, SRR, THBS1, TRPM2
PRKAA1		kinase		-1	0.0402	CXCL12, CXCL8, DOCK4, VCAM1
miR-1252-3p (miRNAs w/seed AAAUGAG)		mature microrna		-0.333	0.0402	ACMSD, CDH10, CLEC6A, CPA3, CXCL12, IGF2BP3, KIF7, POLR1D, SPRED1
miR-125b-5p (and other miRNAs w/seed CCCUGAG)		mature microrna		1.394	0.0403	ALPK3, ARID3B, ASB11, ATP6AP1L, C2, CD300LB, CHRM5, CORO2A, DCX, DOCK3, HIF1AN, ID3, MCAM, MTUS1, NRXN1, PIGR, PKP4, PTPN18, RYBP, SCARB1, SLC45A3, ZNF814
miR-3976 (miRNAs w/seed AUAGAGA)		mature microrna		0.277	0.0404	ACTL6A, C1R, CD36, CEP162, CPA3, CXCL12, EFEMP1, ID3, NRXN1, PRTG, SERPING1, TACC2, TRIM32
Tnf (family)		group		1.96	0.0405	C3AR1, CXCL12, CXCL8, TLR2, VCAM1
IFNAR1		transmembrane receptor			0.0405	CLEC4D, OAS1, THBS1, TLR2, VCAM1
ANGPT2		growth factor		0	0.0405	C1R, CFB, NME1, SERPING1, THBS1, VCAM1
DDX58		enzyme			0.0406	AHNAK, CXCL8, OAS1
CXCR4		g-protein coupled receptor			0.0406	CDH1, CXCL12, CXCL8
paclitaxel		chemical drug			0.0408	ALPK3, CXCL8, CYP4F2, DUSP5, OSMR, SCG5, THBS1, TULP3
miR-6080 (miRNAs w/seed CUAGUGC)		mature microrna		1	0.0409	ADAMTS2, CACNA1D, CXCL12, DMAC1, MON2, PTPN18, SALL2, SEMA3C, SPRED1
miR-3134 (miRNAs w/seed GAUGGAU)		mature microrna		1.155	0.041	AOX1, C2, C2orf68, CLEC6A, DCX, DMAC1, HSPB8, IGF2, NRXN1, OSBPL6, TOB1, ZNF814
miR-3082-5p (and other miRNAs w/seed ACAGAGU)		mature microrna		-0.378	0.041	ACTL6A, ASB11, CALD1, CD1A, DUSP14, FKBP1B, IKBIP
PLA2G10		enzyme		1.067	0.0414	CD36, ETS2, LHX2, SRM
miR-6082 (miRNAs w/seed AAUACGU)		mature microrna		-0.447	0.0415	ARMC10, CRISP2, FCGR3A/FCGR3B, GRK5, TULP3
miR-4299 (miRNAs w/seed CUGGUGA)		mature microrna		0.302	0.0417	ARHGAP32, ATOH8, CD163L1, PHF21A, SERPING1, SLC28A3, SLIT3, THAP7, TMEM232, TPM2, ZNF667
miR-6836-3p (miRNAs w/seed UGCCUCC)		mature microrna		0.218	0.0417	ABHD11, ALPK3, C2orf80, CD300LB, CXCL12, DMAC1, ECHDC3, EFEMP1, FAM20C, HSPBAP1, MEIS1, MMACHC, MR1, OSBPL5, PARD3, PIGS, RYBP, SCPEP1, SNX33, ZNF362, ZNF667
miR-6859-5p (and other miRNAs w/seed AGAGGAA)		mature microrna		-1.091	0.0417	AFAP1L2, AOX1, AQP9, ASB11, C1R, CD1A, CLEC6A, COX6B1, DCX, DYNLT1, GATM, HSPBAP1, KRT80, MCAM, MEIS1, MMACHC, MR1, MYL6B, PARD3, ZMYND10, ZNF280B
miR-1343-3p (and other miRNAs w/seed UCCUGGG)		mature microrna		0.392	0.042	ABCA3, ALPK3, C2orf68, CADPS, CAMK2A, COX6B1, CYB5R2, DNAJC22, DUSP14, ETS2, EVA1C, FOXRED1, GADD45G, KIAA2013, MITF, NFYC, NME1, PLXDC2, RAB11B, SPRED1, SRM, STARD3, TEAD3, TULP3, ULK2, ZNF362
FXR ligand-FXR-Retinoic acid-RXRα		complex			0.0422	FETUB, SCARB1
CDC73		other			0.0422	CDH1, IGF2
ACKR3		g-protein coupled receptor			0.0422	CFH, CXCL12
Mt1		other			0.0422	ETS2, GSTM3
ochratoxin A		chemical toxicant			0.0422	CDH1, DSC2
KN-62		chemical - kinase inhibitor			0.0422	CXCL8, VCAM1
FOXA2		transcription regulator			0.0423	ABCA3, C3, CDH1, DCX, GSTM3, MTUS1
FLI1		transcription regulator			0.0424	CSF1R, PF4, POLR1D
IL6ST		transmembrane receptor			0.0424	CSF1R, LTF, VCAM1
PTEN		phosphatase		1.424	0.0427	C3, CDH1, CST6, CTDSPL, CXCL8, ECI2, ETS2, IGF2, PF4, THBS1, VCAM1
CD28		transmembrane receptor		-0.412	0.0427	C2, CAMK2A, CBLB, CXCL8, DUSP14, IL15RA, THBS1, TOB1, ZFYVE9
miR-574-5p (miRNAs w/seed GAGUGUG)		mature microrna		-0.5	0.043	ARID3B, ASTN2, CACUL1, CADPS, CARD10, CSF1R, ECM1, EFEMP1, HEATR1, IGF2, KIR3DL2, LRRC28, POLR1D, SNX33, TEAD3, TMTC2
miR-6758-5p (and other miRNAs w/seed AGAGAGG)		mature microrna		-1.094	0.0435	ABCA3, AFAP1L2, C2, CAMK2A, CD300LB, CFAP100, CLEC6A, CTNND1, ERFE, FCGR3A/FCGR3B, GP5, KIR3DL2, LRRC28, MEIS1, MRAS, MYL6B, PARD6B, PIGS, SLC45A3, TRIM32, TULP3, ZNF280B, ZNF362
ciprofibrate		chemical drug		-0.463	0.0436	CD36, CSTB, CXCL12, ETS2, SCARB1
phorbol myristate acetate		chemical drug	Activated	3.02	0.0437	ARHGAP32, ARID3B, C3, CD36, CDH1, CSF1R, CXCL8, DUSP5, ECM1, ETS2, GRK5, HRH1, ID3, IGF2, MITF, OAS1, PF4, RYBP, SLC28A3, THBS1, TLR2, VCAM1
miR-6835-5p (and other miRNAs w/seed GGGGGUA)		mature microrna		0.354	0.0437	ADGRB1, AQP9, ARHGAP32, ARID3B, C2orf68, CAMK2A, CDHR5, COL7A1, CSF1R, CTDSPL, CXCL12, DCX, DMTF1, FCGR3A/FCGR3B, GUCY1A2, ID3, IGF2, KPNB1, KRT78, MCAM, MRAS, NFYC, ORC3, OSBP2, OSBPL5, PDF, PTPN18, SCPEP1, SLC45A3, TEAD3, TPM2, TTC5
DUSP1		phosphatase		-0.305	0.044	CXCL8, LTF, TLR2, VCAM1
tacrolimus		chemical drug			0.0441	CD36, CXCL8, DCX, GABRD, ID3, NME1
RNF2		transcription regulator			0.0442	ATOH1, RYBP, SMC1B
MUC1		other			0.0442	CD1A, CDH1, CXCL8
CTNNB1		transcription regulator	Activated	2.218	0.0443	ATOH1, CDH1, CPSF4, CTDSPL, CXCL12, CXCL8, ECM1, GADD45G, ID3, IGF2, LHX2, MITF, NRP2, SCRN1, SEMA3C, VCAM1
UTP		chemical - endogenous mammalian			0.0453	THBS1, VCAM1
NfkB1-RelA		complex			0.0453	CXCL8, VCAM1
mir-23		microrna			0.0453	CDH1, GATM
benzyl isothiocyanate		chemical - endogenous non-mammalian			0.0453	CDH1, VCAM1
irbesartan		chemical drug			0.0453	CD36, VCAM1
MALP-2s		chemical reagent			0.0453	IL15RA, TLR2
tripterine		chemical - endogenous non-mammalian			0.0453	HRH1, VCAM1
rifampin		chemical drug		-0.577	0.0457	CD36, COL6A1, OSBP2, TBC1D9, TLR2
miR-6809-3p (miRNAs w/seed UUCUCUU)		mature microrna		0.775	0.046	ARMC10, ATP6AP1L, CADPS, CLEC4D, DCX, IKBIP, ITPR2, LY6G6D, MYRFL, ORC3, PTER, SMC1B, SRR, TEX29, TMEM232
miR-4744 (miRNAs w/seed CUAAAGA)		mature microrna		-1	0.046	ANK3, CLEC4D, CXCL12, DCX, DUSP14, EFEMP1, HMGN5, LHX2, PRTG
RHO		g-protein coupled receptor			0.046	CSF1R, SELENOP, SERPING1
benzyloxycarbonyl-Leu-Leu-Leu aldehyde		chemical - protease inhibitor		-0.826	0.0464	AKR1B1, CAMK2A, CDH1, CFB, CXCL8, ITPR2, MITF, VCAM1
miR-1255b-2-3p (miRNAs w/seed ACCACUU)		mature microrna		-0.905	0.0467	AQP9, CADPS, DOCK4, DYNC1H1, EMC6, HSPB8, LDLRAD3, PLXDC2, POLK, TMEM163, ZNF133
ATP		chemical - endogenous mammalian		1.932	0.0468	CDH1, CXCL8, THBS1, VCAM1
miR-6841-3p (miRNAs w/seed CCUUGCA)		mature microrna		-0.243	0.0468	ART5, CLEC4D, CXCL12, DOCK3, DSC2, EFEMP1, FAM120B, HCFC1, HSPB8, IL15RA, PHF21A, POU6F2, SCRN1, SLC28A3, TMEM232, TOB1, TTC38
deferoxamine		chemical drug		0.547	0.0468	CDH1, CXCL8, DUSP5, ECM1, FAM20C, VCAM1
miR-4428 (miRNAs w/seed AAGGAGA)		mature microrna		-0.471	0.0473	ADAMTS2, ASB11, BDH2, CARD10, CCDC92, CTNND1, CXCL8, DCX, DYNLT1, EMC4, GATM, GRK5, KIFC2, KRT78, LTF, NFYC, RYBP, SNX33
miR-181a-2-3p (and other miRNAs w/seed CCACUGA)		mature microrna		-1	0.0473	ACTL6A, ACVR2B, ARHGAP32, CALD1, FCGR3A/FCGR3B, GGACT, GRK5, HEG1, HIF1AN, NMT2, PARD6B, PRKCI, SLC28A3, TEX264, ZMYND10, ZNF280B, ZNF420, ZNF667
miR-3611 (miRNAs w/seed UGUGAAG)		mature microrna		0.277	0.0473	ARID3B, CBLB, CCDC92, CDH10, CLEC6A, DMTF1, GGACT, OOEP, PTER, RYBP, SCG5, TMTC2, VCAM1
Lh		complex		-0.577	0.0474	CARD10, CTNND1, CXCL8, DUSP14, GRK5, THBS1, TPM2
miR-1269a (and other miRNAs w/seed UGGACUG)		mature microrna		0.5	0.0474	AFAP1L2, CACUL1, CLEC4D, DCX, DYNLT1, FAM117A, IKBIP, LRRC28, MEIS1, NRXN1, OR6A2, PARD6B, PHF21A, PTPN18, SRR, TPM2
miR-1290 (miRNAs w/seed GGAUUUU)		mature microrna		0.302	0.0479	ACMSD, ARMC10, CAMK2A, CSTB, ITPR2, OSBPL6, PARD3, PTER, RPL38, SPRED1, TEAD3
CIP2A		other			0.0479	CFB, DSC2, GPR183
TNFSF13B		cytokine			0.0479	CXCL8, DUSP5, GPR183
SMARCA2		transcription regulator			0.0479	CD36, CDH1, NME1
Y 27632		chemical drug			0.0479	CDH1, THBS1, VCAM1
ACTL6A	-1,403	other			0.0485	CDH1, ETS2
mir-135		microrna			0.0485	CDH1, CXCL12
ARRB1		transporter			0.0485	CXCL8, SCARB1
ATOH1	1,480	transcription regulator			0.0485	ATOH1, NOTCH4
NFE2L2		transcription regulator		0.461	0.0486	AOX1, CD36, CDH1, CXCL8, GADD45G, KIFC2, OSGIN1, SCARB1, SLC1A4, VCAM1
miR-6752-3p (miRNAs w/seed CCCUGCC)		mature microrna		1.095	0.0487	ABCA3, ARID3B, ATOH8, CAMK2A, CSF1R, CYGB, DMTF1, FCGR3A/FCGR3B, HCFC1, HIF1AN, ID3, IGF2, ING5, LDLRAD3, LTF, MCAM, MRAS, NRP2, PBX1, PHF21A, POLR1D, RYBP, SCRN1, SNX33, TTC38, ZNF362
miR-1204 (miRNAs w/seed CGUGGCC)		mature microrna	Activated	2.309	0.0489	ADGRB1, CAMK2A, CCDC92, CD300LB, CPSF4, ERFE, GABRD, IGF2BP3, KIFC2, PHF21A, POU6F2, SCARB1
miR-202-5p (miRNAs w/seed UCCUAUG)		mature microrna		0.632	0.0493	CD300LB, CRISP2, FMC1, HRH1, LTF, MITF, PIGS, SALL2, TMEM163, TMEM232
IL10		cytokine		-0.28	0.0494	CD163L1, CD1A, CSF1R, CXCL12, CXCL8, ETS2, FCGR3A/FCGR3B, TLR2, VCAM1
PI3K (family)		group		0.507	0.0496	CDH1, CXCL12, CXCL8, SCARB1
miR-215-3p (miRNAs w/seed CUGUCAU)		mature microrna		-0.302	0.0497	CLEC4D, CLEC6A, FKBP1B, IKBIP, ITPR2, NME1, PTER, SCG5, SCPEP1, SEMA3C, SIVA1
rosiglitazone		chemical drug		1.977	0.0512	C3, CD36, CDH1, CXCL8, IGF2, MR1, OAS1, SCARB1, SEMA3C, THBS1
progesterone		chemical - endogenous mammalian	Activated	2.058	0.0527	C3, CD36, CDH1, CFB, CTDSPL, CXCL12, CXCL8, GABRD, ID3, LTF, PHF21A, PIGR, SRD5A1
N-acetyl-L-cysteine		chemical drug	Inhibited	-2.366	0.0537	C3, CD36, CDH1, CXCL8, OSGIN1, VCAM1
miR-1291 (and other miRNAs w/seed GGCCCUG)		mature microrna	Activated	2.117	0.0549	ADGRB1, ARID3B, CARD10, CCDC94, COL6A1, DCX, ERFE, GADD45G, GGACT, HIF1AN, IL15RA, KLF15, KRT80, MCAM, MRPS35, NRP2, OSBPL5, RYBP, SNX33, STARD3, TEX264, TMTC2, TRIM32, TTC38, ULK2, ZMYND10, ZNF205
miR-4424 (miRNAs w/seed GAGUUAA)		mature microrna	Inhibited	-2.309	0.056	CALD1, CFAP53, DYNLT1, FOXRED1, GGACT, IKBIP, LDLRAD3, MAP7D3, SLC11A2, SLC28A3, SPRED1, TEX14
SRC		kinase		1.951	0.0617	CDH1, CTNND1, CXCL8, VCAM1
AKT1		kinase		1.942	0.064	CDH1, CXCL8, GATM, IGF2, KLF15, SIVA1, THBS1
miR-450b-3p (and other miRNAs w/seed UUGGGGA)		mature microrna	Activated	3.024	0.0664	AKR1B1, ALPK3, ARID3B, ARMC10, ATOH8, BBS4, CD300LB, CPA3, DCX, ERFE, HCFC1, HRH1, HSPB8, IGF2, IGF2BP3, KRT80, LRRC28, LTF, MMACHC, ORC3, OSBP2, PANX2, PDF, PTER, PTPN18, SELENOP, SLC45A3, TMEM35B
miR-648 (miRNAs w/seed AGUGUGC)		mature microrna		-1.941	0.0675	AQP9, CARD10, CD36, CHRM5, DMTF1, IGF2, LRRC28, PARD3, PBX1, PIGS, PRKCI, THBS1, TRAPPC13
miR-3190-5p (miRNAs w/seed CUGGCCA)		mature microrna		1.789	0.0724	AKR1B1, ARID3B, CD300LB, CST6, DCX, EMC6, ERFE, GALNT2, HEG1, HSPB8, ING5, KLF15, KRT80, NME1, OR6A2, OSMR, PTPN18, RAB11B, TPM2, ZNF362
miR-1247-5p (miRNAs w/seed CCCGUCC)		mature microrna		1.897	0.073	CCDC96, ERFE, ETS2, FAM20C, ING5, NRP2, PHF21A, RAB11B, SALL2, SIVA1
miR-3659 (miRNAs w/seed GAGUGUU)		mature microrna	Inhibited	-2.53	0.0756	CADPS, CAMK2A, CARD10, DOCK4, ECM1, EFEMP1, EVA1C, FAM208B, PIGS, PPFIBP1
estrogen		chemical drug	Inhibited	-2.38	0.079	CXCL12, IGF2, LTF, NME1, RAB11B, SCARB1, SRM
miR-1248 (miRNAs w/seed CCUUCUU)		mature microrna		-1.941	0.0862	ASB11, ATP6AP1L, ECHDC3, EVA1C, HCFC1, HMGN5, HRH1, IKBIP, KRT78, NRXN1, POLK, SEMA3C, SLIT3
STAT1		transcription regulator	Activated	2.401	0.0867	C1R, C3, CFB, CXCL8, IL15RA, OAS1, PF4, SERPING1
miR-6755-5p (miRNAs w/seed AGGGUAG)		mature microrna		1.807	0.0899	AKR1B1, ARMC10, C2orf68, CCDC141, CYP4F2, FETUB, FOXRED1, ING5, LDLRAD3, MRPS35, MTUS1, NRXN1, RGS6, ZNF420, ZSCAN12
curcumin		chemical drug	Inhibited	-2.021	0.0957	CD36, CDH1, CXCL8, SCARB1, TACC2, TLR2, TOB1, VCAM1
miR-3713 (miRNAs w/seed GUAUCCG)		mature microrna	Activated	2	0.102	HSPB8, PDF, SCG5, TOB1
mibolerone		chemical drug	Inhibited	-2	0.104	AHNAK, GADD45G, NME1, SRM
miR-769-5p (miRNAs w/seed GAGACCU)		mature microrna		1.897	0.109	CD300LB, CYGB, DCX, FAM20C, HIF1AN, ID3, IKBIP, MRPS35, PARD6B, ZSCAN12
miR-646 (miRNAs w/seed AGCAGCU)		mature microrna	Activated	2.5	0.119	ACVR2B, ARMC10, C2orf68, CACUL1, COL7A1, CSTB, DMAC1, EMC4, FKBP1B, MRPS35, NFYC, OOEP, PARD6B, SCRN1, SPRED1, TTC38
Interferon alpha		group	Activated	2.178	0.123	C3, C3AR1, CXCL8, DYNLT1, IL15RA, OAS1, SMC1B, TLR2, VCAM1
miR-1249-3p (and other miRNAs w/seed CGCCCUU)		mature microrna		1.89	0.123	FKBP1B, ING5, OSBP2, POLR3E, RGS6, SERPING1, ZNF205
miR-431-5p (and other miRNAs w/seed GUCUUGC)		mature microrna	Activated	2.111	0.127	ABHD11, AKR1B1, ARMC10, ATOH8, CRISP2, DOCK4, IGF2BP3, IKBIP, OSBP2, SCG5, THAP7
miR-4300 (and other miRNAs w/seed GGGAGCU)		mature microrna		1.877	0.127	CCDC141, CD300LB, CDH1, CDHR5, CTDSPL, CYGB, DCX, GP5, HSPB8, ID3, KIFC2, KRT80, LDLRAD3, MCAM, OSGIN1, PIGQ, POU6F2, SLC1A4, SNX33, SRR, TEAD3, TRIM32, ZCCHC17
miR-1296-5p (miRNAs w/seed UAGGGCC)		mature microrna		1.941	0.133	ATOH8, CD300LB, CDH1, COL6A1, CTDSPL, CTNND1, CYP4F2, FAM117A, HIF1AN, KNOP1, MTUS1, SCRN1, SRD5A1
EZH2		transcription regulator		1.857	0.14	ATOH1, C3, CDH1, CXCL8, CYB5R2, MYL6B, NME1
SP600125		chemical - kinase inhibitor	Inhibited	-2.172	0.143	COL7A1, CSF1R, CXCL8, THBS1, VCAM1
miR-1285-3p (and other miRNAs w/seed CUGGGCA)		mature microrna		1.955	0.15	ALPK3, AQP9, ASTN2, ATOH8, C2orf68, CAMK2A, CBLB, CDH1, CDHR5, CSF1R, CYGB, DUSP14, ERFE, GABRD, GRK5, HSPB8, MRAS, MYL12B, PARD6B, PHF21A, PTPN18, RYBP, SLIT3, SRR, TEAD3, TRPM2, TULP3, ZNF362
CST5		other	Inhibited	-2.449	0.158	AHNAK, ANK3, CDH1, EVA1C, ID3, NUP98
miR-4470 (miRNAs w/seed GGCAAAC)		mature microrna		1.897	0.162	ATXN10, CHRM5, CORO2A, CXCL12, DCX, IGF2BP3, PHF21A, PTER, RYBP, TULP3
miR-3140-5p (miRNAs w/seed CCUGAAU)		mature microrna	Inhibited	-2.333	0.167	CDH10, DOCK4, IGF2BP3, IL15RA, MITF, PPFIBP1, PRKCI, THBS1, ZNF280B
miR-4503 (miRNAs w/seed UUAAGCA)		mature microrna		1.897	0.173	AFAP1L2, ARMC10, DMAC1, MRPS35, OSBP2, POU6F2, PTER, SPRED1, VCAM1, ZCCHC17
miR-4720-3p (miRNAs w/seed GCUUAAG)		mature microrna		-1.89	0.173	AOX1, CDH10, DMTF1, ECHDC3, EFEMP1, IGF2BP3, SPRED1
miR-3151-3p (miRNAs w/seed CUGAUCC)		mature microrna	Activated	2.333	0.174	BBS4, DNAH7, GABRD, GGACT, IGF2BP3, PARD6B, PHF21A, PLXDC2, SCRN1
miR-1343-5p (and other miRNAs w/seed GGGGAGC)		mature microrna		1.8	0.175	ADGRB1, ARID3B, CAMK2A, CD300LB, CDH1, CDHR5, CXCL12, CYGB, DUSP14, FAM20C, IGF2, KRT78, LTF, MCAM, NFYC, NUP98, OSBP2, RAB11B, SCARB1, SELENOP, SLC1A4, SLC45A3, SNX33, TTC5, ZNF814
miR-132-5p (miRNAs w/seed CCGUGGC)		mature microrna	Activated	2.333	0.177	ADGRB1, CCDC92, FKBP1B, GABRD, IGF2, ING5, PHF21A, RAB11B, ZNF667
miR-3685 (miRNAs w/seed UUCCUAC)		mature microrna		1.89	0.183	AFAP1L2, KIFC2, NME1, POLR1D, ULK2, ZNF420, ZSCAN12
TLR2	1,342	transmembrane receptor		1.935	0.185	CD1A, CXCL8, IL15RA, TLR2
RELA		transcription regulator		1.991	0.185	C3, CFB, CXCL8, GRK5, IL15RA, SMC1B, TLR2, VCAM1
miR-1273d (miRNAs w/seed AACCCAU)		mature microrna	Inhibited	-2	0.201	CEP55, CXCL8, LDLRAD3, TEAD3
miR-4636 (miRNAs w/seed ACUCGUG)		mature microrna	Activated	2.236	0.201	CXCL12, IGF2, NRXN1, PARD6B, PDF
miR-4435 (miRNAs w/seed UGGCCAG)		mature microrna	Activated	2.236	0.205	ABHD11, AFAP1L2, ALPK3, ATOH8, CACUL1, CD300LB, CDH1, DNAJC22, FAM117A, HRH1, ID3, KRT80, MMACHC, NME1, NMT2, OSBPL5, PARD3, PIGS, POLR1D, SPRED1
miR-3171 (miRNAs w/seed GAUGUAU)		mature microrna	Inhibited	-2.333	0.206	AQP9, ARMC10, GATM, MEIS1, MPP6, POLK, PRKCI, RGSL1, ZNF667
bleomycin		chemical drug		1.963	0.206	C3, KLF15, THBS1, TLR2
miR-651-5p (miRNAs w/seed UUAGGAU)		mature microrna		1.89	0.214	ACMSD, COX6B1, CPSF4, CSTB, GATM, SIVA1, TMEM163
miR-4772-3p (and other miRNAs w/seed CUGCAAC)		mature microrna		1.89	0.216	ASTN2, CBLB, CPSF4, EMC4, FKBP1B, HEATR1, SERPING1
miR-6878-5p (miRNAs w/seed GGGAGAA)		mature microrna	Activated	2.746	0.235	ALPK3, ARMC10, CAMK2A, CCDC141, COX6B1, CTDSPL, CTNND1, DCX, DUSP14, FAM117A, IGF2, KIFC2, KRT78, LDLRAD3, NFYC, NME1, NRXN1, OSBP2, PDF, POLR1D, POU6F2, PTER, PTPN18, RAB11B, STARD10, TPM2
miR-4437 (miRNAs w/seed GGGCUCA)		mature microrna		1.857	0.237	ARID3B, ARMC10, CCDC96, CDHR5, DNAJC22, ECHDC3, FCGR3A/FCGR3B, FETUB, GALNT2, HSPBAP1, IL15RA, KIAA1549L, LDLRAD3, OSBPL5, PBX1, PTER, RGS6, SALL2, SEPHS2, SPRED1, ZNF362
miR-3194-3p (miRNAs w/seed GCUCUGC)		mature microrna		1.807	0.237	ARID3B, BBS4, CACUL1, DNAJC22, EMC4, FAM117A, GSTM3, ID3, NMT2, OSMR, PLEKHA5, SCRN1, SEPHS2, SPRED1, ZMYND10
miR-22-3p (miRNAs w/seed AGCUGCC)		mature microrna		1.923	0.242	ALPK3, AQP9, ARID3B, ATOH8, CACUL1, CDH1, CHRM5, CPSF4, CSF1R, DNAH7, FAM117A, GATM, GGACT, HIF1AN, KRT80, MON2, PBX1, ULK2
miR-6758-3p (miRNAs w/seed CUCAUUC)		mature microrna		-1.912	0.243	CACUL1, CADPS, EFEMP1, FCGR3A/FCGR3B, KPNB1, PPFIBP1, ZNF667
miR-6510-5p (miRNAs w/seed AGCAGGG)		mature microrna	Activated	2.982	0.25	AKR1B1, ARHGAP32, ASTN2, COX6B1, CPSF4, ETS2, ID3, LTF, PBX1, PHF21A, PIGQ, POLR1D, PTPN18, RAB11B, SERPING1, SRD5A1, TEAD3, TEX264, TPM2
miR-101-5p (miRNAs w/seed AGUUAUC)		mature microrna	Inhibited	-2.236	0.256	CLEC6A, IKBIP, MEIS1, SPRED1, ZNF667
miR-5088-5p (miRNAs w/seed AGGGCUC)		mature microrna	Activated	2.84	0.263	AKR1B1, CPSF4, FAM117A, FETUB, GABRD, GALNT2, GGACT, OSBPL5, PTER, SALL2, SLC1A4, SLIT3, SNX33, SRD5A1, ZBTB40
miR-4783-5p (miRNAs w/seed GCGCGCC)		mature microrna	Activated	2	0.268	CDHR5, ING5, PANX2, TTC38
miR-4796-3p (miRNAs w/seed AAAGUGG)		mature microrna		1.89	0.271	C1R, CDH1, OSBPL5, RYBP, SERPING1, SRD5A1, TMEM35B
miR-4283 (miRNAs w/seed GGGGCUC)		mature microrna	Activated	2.236	0.273	ATOH8, COL6A1, GRK5, HRH1, IGF2, KIAA1549L, LDLRAD3, MCAM, MYOF, NUP98, OSBP2, OSBPL5, PANX2, PBX1, PIGR, POU6F2, PTPN18, SRM, STARD10, ZMYND10
miR-6776-5p (miRNAs w/seed CUGGGUG)		mature microrna	Activated	3	0.289	CD300LB, FAM117A, HEG1, HSPB8, IGF2, IGF2BP3, KIAA2013, NME1, OSBPL5, PIGR, POU6F2, RAB11B, SRM, TEAD3, TEX264, ZMYND10
miR-337-3p (and other miRNAs w/seed CAGCUCC)		mature microrna	Activated	2.138	0.292	AOX1, CCDC141, CD300LB, CTDSPL, CXCL12, FAM117A, FKBP1B, HSPB8, ING5, NME1, RYBP, SCG5, SLC45A3, ZNF205
miR-2116-5p (miRNAs w/seed GUUCUUA)		mature microrna	Inhibited	-2	0.294	CHRM5, CTDSPL, SLC11A2, ZNF667
miR-642b-5p (miRNAs w/seed GUUCCCU)		mature microrna		1.89	0.31	ATXN10, DMTF1, DNAJC22, LY6G6D, OOEP, PBX1, SCRN1
NKX2-3		transcription regulator		1.993	0.321	CD36, CEP55, CXCL8, VCAM1
miR-290b-3p (and other miRNAs w/seed AGUGCCC)		mature microrna	Activated	2.111	0.328	C3AR1, CACNA1D, CARD10, CCDC94, CST6, CXCL12, GPR183, OAS1, PHF21A, SLC1A4, ZSCAN12
miR-3144-5p (miRNAs w/seed GGGGACC)		mature microrna	Activated	3.771	0.331	AKR1B1, ALPK3, CDHR5, COL6A1, CXCL12, CYGB, DCX, DNAH7, FAM117A, GUCY1A2, HSPB8, IGF2, PDF, PIGR, RAB11B, RGS6, SLC45A3, TTC38
miR-548av-3p (miRNAs w/seed AAACUGC)		mature microrna	Inhibited	-2.121	0.332	DMTF1, DSC2, GRTP1, LDLRAD3, MTUS1, SELENOP, SEMA3C, SPRED1
miR-4760-5p (and other miRNAs w/seed UUAGAUU)		mature microrna	Inhibited	-2.449	0.339	DYNLT1, IKBIP, PF4, SEPHS2, TRAPPC13, ZNF280B
miR-4513 (and other miRNAs w/seed GACUGAC)		mature microrna	Inhibited	-2.333	0.342	AQP9, ARHGAP32, BBS4, CLEC4D, PARD3, SLC28A3, TEAD3, TPM2, ZNF667
miR-4270 (and other miRNAs w/seed CAGGGAG)		mature microrna		1.877	0.349	BBS4, CD300LB, CDH1, CEP55, CFAP53, CLEC6A, CPSF4, CYGB, DCX, IGF2, KRT80, NME1, NRXN1, PIGQ, PIGR, RAB11B, SALL2, SERPING1, SLIT3, TEAD3, TPM2, TRPM2, ZNF362
miR-224-3p (and other miRNAs w/seed AAAUGGU)		mature microrna		-1.89	0.35	AQP9, ARMC10, ASB11, KIF7, OAS1, PRKCI, SELENOP
miR-3589 (and other miRNAs w/seed AGGAAAC)		mature microrna	Activated	2	0.356	CPSF4, NFYC, SMYD2, SRR
miR-193a-3p (and other miRNAs w/seed ACUGGCC)		mature microrna	Activated	2.138	0.366	ARID3B, ATOH8, C2orf80, CST6, ERFE, HEG1, ING5, KIAA2013, NME1, OSMR, SLC1A4, TPM2, TTC5, ZSCAN12
ethanol		chemical - endogenous mammalian		1.99	0.367	C3AR1, CXCL8, GABRD, SLC11A2, TLR2, VCAM1
miR-6075 (miRNAs w/seed CGGCCCA)		mature microrna	Activated	2.333	0.368	ADGRB1, APLP2, CARD10, CST6, CYGB, ETS2, NFYC, NME1, ZMYND10
miR-6918-5p (and other miRNAs w/seed GCUGAGG)		mature microrna	Activated	2.357	0.369	ARID3B, CD300LB, DCX, EMC4, IRAK2, LDLRAD3, LTF, PANX2, PARD6B, PIGQ, PIGR, POLR3E, POU6F2, PPFIBP1, PTPN18, SCG5, SERPING1, STX2
miR-4722-3p (and other miRNAs w/seed CCUGCCA)		mature microrna		1.942	0.394	ABHD11, ALPK3, CSTB, CYGB, DNAJC22, ETS2, FCGR3A/FCGR3B, FKBP1B, GADD45G, KIFC2, KNOP1, LTF, NME1, NMT2, PARVB, PBX1, RAB11B, RGSL1, SCRN1, STARD3, TEAD3, TMEM232, TTC38, TULP3
miR-3960 (and other miRNAs w/seed GCGGCGG)		mature microrna	Activated	2.449	0.397	CDHR5, CXCL12, FETUB, GALNT2, ING5, RGS6
miR-5002-3p (miRNAs w/seed GACUGCC)		mature microrna	Inhibited	-2.333	0.411	ABCA3, ALPK3, CLEC4D, CSF1R, DOCK3, ITPR2, KIF7, KPNB1, KRT78
miR-4278 (miRNAs w/seed UAGGGGG)		mature microrna	Activated	2.138	0.421	CAMK2A, CYGB, GGACT, IGF2BP3, NOTCH4, OAS1, PTER, PTPN18, SALL2, SLIT3, SRD5A1, ZNF362, ZNF814, ZSCAN12
miR-5107-3p (and other miRNAs w/seed AACCUGU)		mature microrna		-1.89	0.423	CD36, DCX, DMTF1, IKBIP, KLF15, SPRED1, TRAPPC13
miR-936 (miRNAs w/seed CAGUAGA)		mature microrna		-1.897	0.423	CALD1, CBLB, CEP55, FCGR3A/FCGR3B, MPP6, PTER, SELENOP, SLC11A2, SPRED1, SRR
TLR3		transmembrane receptor		1.954	0.425	C3, CFB, CXCL8, OAS1
miR-6765-3p (miRNAs w/seed CACCUGG)		mature microrna	Activated	2.121	0.43	AKR1B1, CXCL12, DNAJC22, HIF1AN, KNOP1, MCAM, SLC11A2, THAP7
miR-214-3p (and other miRNAs w/seed CAGCAGG)		mature microrna	Activated	2.357	0.436	ALPK3, ARID3B, BBS4, CAMK2A, CPSF4, CYGB, ERFE, KIF7, KIFC2, KRT78, LTF, MRPS35, PTER, PTPN18, SLC1A4, SRD5A1, TPM2, TTC38
miR-665 (and other miRNAs w/seed CCAGGAG)		mature microrna		1.886	0.436	APLP2, CACUL1, CCDC92, CD300LB, CFAP53, CFH, CXCL8, CYGB, DCX, GP5, ID3, IGF2, KNOP1, OSBPL5, PARD6B, STARD3, ZCCHC17, ZSCAN12
miR-6516-5p (miRNAs w/seed UUGCAGU)		mature microrna	Inhibited	-2.646	0.438	APLP2, CALD1, CD36, MITF, MPP6, PRKCI, ZNF667
SP1		transcription regulator		1.969	0.442	CDH1, COL7A1, CXCL12, CXCL8, IGF2, SCARB1, SLC11A2, TLR2
CEBPB		transcription regulator		1.964	0.449	C3, CSF1R, CXCL8, DYNLT1, SCARB1, XIST
miR-943 (miRNAs w/seed UGACUGU)		mature microrna		-1.89	0.465	AQP9, CHRM5, CSF1R, CXCL8, OAS1, SLC11A2, SRR
testosterone		chemical - endogenous mammalian	Inhibited	-2.182	0.469	CDH1, ID3, SRD5A1, THBS1, VCAM1
miR-3682-3p (miRNAs w/seed GAUGAUA)		mature microrna		1.89	0.469	CRISP2, CXCL12, PANX2, POLR1D, RGS6, SCARB1, TMEM35B
miR-6741-5p (and other miRNAs w/seed UGGGUGC)		mature microrna	Activated	2.121	0.475	CD300LB, FOXRED1, HEATR1, OSBPL5, PIGR, RAB11B, SMC1B, ZCCHC17
miR-4312 (miRNAs w/seed GCCUUGU)		mature microrna	Inhibited	-2	0.477	AHNAK, AQP9, CXCL8, SPRED1
miR-615-5p (and other miRNAs w/seed GGGGUCC)		mature microrna	Activated	2.309	0.479	ASTN2, CCDC94, CYP4F2, ID3, IGF2, ING5, KNOP1, KPNB1, MRAS, PTPN18, RYBP, SCAND1
miR-26a-5p (and other miRNAs w/seed UCAAGUA)		mature microrna		1.89	0.48	GRTP1, KIAA2013, SLC28A3, SMYD2, SRD5A1, TOB1, ULK2
miR-3667-5p (miRNAs w/seed AAGACCC)		mature microrna		1.89	0.488	ASTN2, ATOH8, CARD10, EMC4, GALNT2, MYOF, OSBP2
miR-5624-3p (and other miRNAs w/seed UAAGGCA)		mature microrna	Activated	2	0.489	CPSF4, CTDSPL, FKBP1B, HEATR1, HRH1, LHX2, MITF, OSBPL5, OSBPL6, PTER, RRAGD, RYBP, SRD5A1, TACC2, ULK2, ZNF362
miR-4762-5p (miRNAs w/seed CAAAUCU)		mature microrna	Inhibited	-2.236	0.497	AOX1, CLEC4D, LDLRAD3, SELENOP, ZNF814
